# Supplementary material for: Antifouling polymeric nanocomposite membrane based on interfacial polymerization of polyamide enhanced with green TiO2nanoparticles for water desalination
Source: PeerJ journal article supplement (doi:10.7717/peerj-achem.26), 2023-06-14
Supplement: Suplementary_Raw_Data_Figures.xlsx [file Suplementary_Raw_Data_Figures.xlsx]

## Sheet: Raw_Data_Figure_1_a_b
Raw_Data_Figure1_a (absorption spectrum)				Raw_Data_Figure1_b (Tauc plot)
λ nm	Absorbance			Energy (ev)	(ahv)^2
200	0.129			6.2	3.39274
200.5	0.162			6.18454	5.32393
201	0.136			6.16915	3.73351
201.5	0.155667			6.15385	4.86712
202	0.173667			6.13861	6.02784
202.5	0.186667			6.12346	6.9297
203	0.220667			6.10837	9.63635
203.5	0.227			6.09337	10.1474
204	0.258333			6.07843	13.0777
204.5	0.277			6.06357	14.9625
205	0.289333			6.04878	16.245
205.5	0.304333			6.03406	17.8857
206	0.313333			6.01942	18.8673
206.5	0.327			6.00484	20.4497
207	0.337667			5.99034	21.7004
207.5	0.343667			5.9759	22.3702
208	0.346667			5.96154	22.6532
208.5	0.343333			5.94724	22.1132
209	0.346667			5.93301	22.4369
209.5	0.351			5.91885	22.8917
210	0.357			5.90476	23.5683
210.5	0.354667			5.89074	23.1509
211	0.35			5.87678	22.4389
211.5	0.355333			5.86288	23.0188
212	0.358667			5.84906	23.3422
212.5	0.360667			5.83529	23.4923
213	0.361333			5.8216	23.4686
213.5	0.357333			5.80796	22.8445
214	0.357333			5.79439	22.7379
214.5	0.359667			5.78089	22.9286
215	0.361			5.76744	22.9916
215.5	0.361			5.75406	22.885
216	0.362			5.74074	22.9056
216.5	0.360667			5.72748	22.6322
217	0.363333			5.71429	22.8624
217.5	0.367667			5.70115	23.3035
218	0.366333			5.68807	23.0288
218.5	0.370333			5.67506	23.4269
219	0.367667			5.6621	22.9854
219.5	0.371333			5.6492	23.3394
220	0.376333			5.63636	23.8633
220.5	0.376667			5.62358	23.7973
221	0.38			5.61086	24.1109
221.5	0.382667			5.59819	24.3403
222	0.387333			5.58559	24.8253
222.5	0.393			5.57303	25.4423
223	0.396667			5.56054	25.8032
223.5	0.4			5.5481	26.1214
224	0.402667			5.53571	26.3528
224.5	0.408667			5.52339	27.0232
225	0.413333			5.51111	27.5212
225.5	0.419			5.49889	28.1557
226	0.422667			5.48673	28.524
226.5	0.428667			5.47461	29.2102
227	0.431667			5.46256	29.4901
227.5	0.436333			5.45055	29.9989
228	0.442333			5.4386	30.6945
228.5	0.446667			5.4267	31.162
229	0.449667			5.41485	31.4443
229.5	0.454333			5.40305	31.9606
230	0.46			5.3913	32.6205
230.5	0.464333			5.37961	33.094
231	0.469667			5.36797	33.7122
231.5	0.474333			5.35637	34.2371
232	0.478			5.34483	34.6187
232.5	0.482333			5.33333	35.0978
233	0.487333			5.32189	35.6756
233.5	0.491667			5.31049	36.1576
234	0.497333			5.29915	36.8379
234.5	0.499333			5.28785	36.9766
235	0.505333			5.2766	37.7096
235.5	0.510333			5.26539	38.2963
236	0.515			5.25424	38.8349
236.5	0.518667			5.24313	39.2234
237	0.523333			5.23207	39.7641
237.5	0.529			5.22105	40.459
238	0.533			5.21008	40.9008
238.5	0.540333			5.19916	41.858
239	0.544667			5.18828	42.3543
239.5	0.548667			5.17745	42.7994
240	0.554333			5.16667	43.5062
240.5	0.556667			5.15593	43.691
241	0.564			5.14523	44.6638
241.5	0.568333			5.13458	45.1651
242	0.570667			5.12397	45.3488
242.5	0.574333			5.1134	45.7442
243	0.580667			5.10288	46.5664
243.5	0.582			5.0924	46.5886
244	0.587			5.08197	47.1985
244.5	0.591333			5.07157	47.7022
245	0.596			5.06122	48.2605
245.5	0.600333			5.05092	48.7656
246	0.604667			5.04065	49.2712
246.5	0.610333			5.03043	49.9956
247	0.614333			5.02024	50.4482
247.5	0.619333			5.0101	51.0658
248	0.622667			5	51.409
248.5	0.627667			4.98994	52.0279
249	0.631667			4.97992	52.4818
249.5	0.636333			4.96994	53.0468
250	0.639			4.96	53.2786
250.5	0.645667			4.9501	54.1792
251	0.647333			4.94024	54.2425
251.5	0.651			4.93042	54.6408
252	0.653667			4.92063	54.871
252.5	0.657667			4.91089	55.3248
253	0.660667			4.90119	55.6103
253.5	0.662667			4.89152	55.727
254	0.667667			4.88189	56.3486
254.5	0.668333			4.8723	56.2396
255	0.671			4.86275	56.4672
255.5	0.672			4.85323	56.4141
256	0.672333			4.84375	56.2498
256.5	0.673667			4.83431	56.2531
257	0.676333			4.8249	56.4789
257.5	0.677667			4.81553	56.4819
258	0.677333			4.8062	56.2078
258.5	0.680333			4.79691	56.4877
259	0.681333			4.78764	56.4353
259.5	0.683			4.77842	56.4934
260	0.683			4.76923	56.2764
260.5	0.683			4.76008	56.0605
261	0.682667			4.75096	55.7914
261.5	0.683333			4.74187	55.6869
262	0.683667			4.73282	55.5287
262.5	0.684			4.72381	55.3713
263	0.683			4.71483	54.9998
263.5	0.682667			4.70588	54.7378
264	0.681			4.69697	54.2647
264.5	0.680667			4.68809	54.0069
265	0.678667			4.67925	53.4875
265.5	0.676667			4.67043	52.9727
266	0.675667			4.66165	52.6178
266.5	0.674667			4.65291	52.2655
267	0.672333			4.64419	51.7104
267.5	0.670667			4.63551	51.2622
268	0.667			4.62687	50.5142
268.5	0.665667			4.61825	50.1252
269	0.664667			4.60967	49.7891
269.5	0.659333			4.60111	48.8117
270	0.657667			4.59259	48.3855
270.5	0.655			4.5841	47.8167
271	0.651			4.57565	47.0603
271.5	0.647333			4.56722	46.3604
272	0.643667			4.55882	45.6684
272.5	0.639			4.55046	44.8435
273	0.636667			4.54212	44.3537
273.5	0.634			4.53382	43.8223
274	0.630333			4.52555	43.1589
274.5	0.625667			4.5173	42.3675
275	0.622667			4.50909	41.8097
275.5	0.619333			4.50091	41.2133
276	0.614667			4.49275	40.4476
276.5	0.611333			4.48463	39.8655
277	0.606667			4.47653	39.1176
277.5	0.6			4.46847	38.1248
278	0.596			4.46043	37.483
278.5	0.591			4.45242	36.7245
279	0.586667			4.44444	36.0583
279.5	0.582667			4.43649	35.4412
280	0.577333			4.42857	34.6712
280.5	0.572333			4.42068	33.9519
281	0.568333			4.41281	33.3599
281.5	0.564667			4.40497	32.814
282	0.559333			4.39716	32.083
282.5	0.556			4.38938	31.5896
283	0.551			4.38163	30.9145
283.5	0.546333			4.3739	30.2859
284	0.541333			4.3662	29.6295
284.5	0.538333			4.35852	29.1991
285	0.532667			4.35088	28.4874
285.5	0.529333			4.34326	28.0335
286	0.524333			4.33566	27.4103
286.5	0.519333			4.3281	26.7963
287	0.515333			4.32056	26.2932
287.5	0.511333			4.31304	25.7967
288	0.505667			4.30556	25.1406
288.5	0.501333			4.29809	24.6259
289	0.495			4.29066	23.9247
289.5	0.491667			4.28325	23.5221
290	0.485			4.27586	22.8097
290.5	0.480333			4.2685	22.2959
291	0.475667			4.26117	21.7897
291.5	0.471			4.25386	21.291
292	0.465667			4.24658	20.7403
292.5	0.460667			4.23932	20.228
293	0.456667			4.23208	19.8105
293.5	0.452667			4.22487	19.3987
294	0.449			4.21769	19.0208
294.5	0.444667			4.21053	18.5922
295	0.440333			4.20339	18.1698
295.5	0.435667			4.19628	17.7266
296	0.432			4.18919	17.3706
296.5	0.426667			4.18212	16.8873
297	0.423333			4.17508	16.5685
297.5	0.419333			4.16807	16.2023
298	0.415333			4.16107	15.8414
298.5	0.411333			4.1541	15.4857
299	0.408667			4.14716	15.2345
299.5	0.407			4.14023	15.06
300	0.403667			4.13333	14.765
300.5	0.401			4.12646	14.5222
301	0.397667			4.1196	14.2343
301.5	0.395333			4.11277	14.0211
302	0.392333			4.10596	13.7635
302.5	0.390333			4.09917	13.5785
303	0.388			4.09241	13.3724
303.5	0.386667			4.08567	13.2369
304	0.383667			4.07895	12.9895
304.5	0.382333			4.07225	12.857
305	0.380333			4.06557	12.6812
305.5	0.381			4.05892	12.6841
306	0.378667			4.05229	12.4883
306.5	0.376333			4.04568	12.2946
307	0.372			4.03909	11.974
307.5	0.373			4.03252	11.9994
308	0.371333			4.02597	11.8538
308.5	0.370333			4.01945	11.7519
309	0.368			4.01294	11.5667
309.5	0.368333			4.00646	11.5503
310	0.366333			4	11.3883
310.5	0.366333			3.99356	11.3517
311	0.364333			3.98714	11.192
311.5	0.362333			3.98074	11.034
312	0.361333			3.97436	10.938
312.5	0.36			3.968	10.8227
313	0.359333			3.96166	10.7482
313.5	0.357667			3.95534	10.6148
314	0.357			3.94904	10.5416
314.5	0.356			3.94277	10.4494
315	0.355667			3.93651	10.3967
315.5	0.354333			3.93027	10.2862
316	0.352667			3.92405	10.1575
316.5	0.351			3.91785	10.0299
317	0.350667			3.91167	9.97934
317.5	0.349			3.90551	9.85359
318	0.349667			3.89937	9.86019
318.5	0.347333			3.89325	9.69852
319	0.347667			3.88715	9.6867
319.5	0.346667			3.88106	9.60094
320	0.345			3.875	9.47915
320.5	0.342667			3.86895	9.32221
321	0.342			3.86293	9.25707
321.5	0.341333			3.85692	9.19235
322	0.337667			3.85093	8.96801
322.5	0.338667			3.84496	8.99325
323	0.337667			3.83901	8.91256
323.5	0.337			3.83308	8.84998
324	0.336333			3.82716	8.78782
324.5	0.333667			3.82126	8.62239
325	0.331333			3.81538	8.47607
325.5	0.331333			3.80952	8.45005
326	0.33			3.80368	8.35649
326.5	0.328667			3.79786	8.26373
327	0.329			3.79205	8.2552
327.5	0.325667			3.78626	8.06409
328	0.325			3.78049	8.00664
328.5	0.325			3.77473	7.98228
329	0.323667			3.769	7.89288
329.5	0.323			3.76328	7.83656
330	0.322			3.75758	7.76453
330.5	0.32			3.75189	7.64519
331	0.319667			3.74622	7.60624
331.5	0.317667			3.74057	7.48872
332	0.316			3.73494	7.38804
332.5	0.314667			3.72932	7.30381
333	0.314			3.72372	7.25107
333.5	0.313			3.71814	7.18337
334	0.313			3.71257	7.16188
334.5	0.312333			3.70703	7.1101
335	0.310333			3.70149	6.9984
335.5	0.308333			3.69598	6.88791
336	0.308333			3.69048	6.86742
336.5	0.305667			3.68499	6.7291
337	0.305667			3.67953	6.70915
337.5	0.306			3.67407	6.70388
338	0.304667			3.66864	6.62594
338.5	0.302667			3.66322	6.51993
339	0.302			3.65782	6.47211
339.5	0.301333			3.65243	6.4246
340	0.301			3.64706	6.39155
340.5	0.3			3.6417	6.33052
341	0.298333			3.63636	6.24203
341.5	0.298			3.63104	6.20987
342	0.296333			3.62573	6.12266
342.5	0.294333			3.62044	6.02267
343	0.294667			3.61516	6.01873
343.5	0.294			3.6099	5.9741
344	0.293667			3.60465	5.94325
344.5	0.292667			3.59942	5.88572
345	0.292667			3.5942	5.86867
345.5	0.291667			3.589	5.81177
346	0.290333			3.58382	5.74213
346.5	0.289333			3.57864	5.68619
347	0.287333			3.57349	5.59171
347.5	0.287667			3.56835	5.58857
348	0.286667			3.56322	5.53385
348.5	0.285333			3.55811	5.46677
349	0.284667			3.55301	5.42567
349.5	0.283			3.54793	5.34699
350	0.282667			3.54286	5.31918
350.5	0.283667			3.5378	5.34161
351	0.282			3.53276	5.26399
351.5	0.280667			3.52774	5.19951
352	0.280333			3.52273	5.17244
352.5	0.280667			3.51773	5.17005
353	0.28			3.51275	5.13095
353.5	0.278333			3.50778	5.05572
354	0.276667			3.50282	4.98125
354.5	0.277			3.49788	4.97919
355	0.275667			3.49296	4.91749
355.5	0.275333			3.48805	4.89181
356	0.274			3.48315	4.83095
356.5	0.274			3.47826	4.81741
357	0.271333			3.47339	4.71087
357.5	0.271333			3.46853	4.6977
358	0.271			3.46369	4.67309
358.5	0.268333			3.45886	4.5688
359	0.268333			3.45404	4.55608
359.5	0.268333			3.44924	4.54342
360	0.269667			3.44444	4.57594
360.5	0.266667			3.43967	4.46229
361	0.265			3.4349	4.39449
361.5	0.264333			3.43015	4.36032
362	0.264333			3.42541	4.34828
362.5	0.263667			3.42069	4.31445
363	0.262333			3.41598	4.25917
363.5	0.261333			3.41128	4.21514
364	0.260667			3.40659	4.18215
364.5	0.262			3.40192	4.21346
365	0.259333			3.39726	4.11682
365.5	0.258333			3.39261	4.07397
366	0.258667			3.38798	4.07333
366.5	0.259			3.38336	4.0727
367	0.259			3.37875	4.06161
367.5	0.257333			3.37415	3.99861
368	0.255667			3.36957	3.93626
368.5	0.254667			3.36499	3.89494
369	0.255667			3.36043	3.91495
369.5	0.255			3.35589	3.88403
370	0.254333			3.35135	3.85331
370.5	0.252333			3.34683	3.78272
371	0.251			3.34232	3.73277
371.5	0.249667			3.33782	3.68328
372	0.249667			3.33333	3.67339
372.5	0.25			3.32886	3.67332
373	0.249			3.3244	3.63423
373.5	0.248333			3.31995	3.60512
374	0.248333			3.31551	3.59549
374.5	0.247			3.31108	3.54749
375	0.247			3.30667	3.53804
375.5	0.245667			3.30226	3.49063
376	0.245333			3.29787	3.47191
376.5	0.245			3.29349	3.45329
377	0.245333			3.28912	3.45352
377.5	0.244333			3.28477	3.41635
378	0.243333			3.28042	3.37949
378.5	0.243			3.27609	3.36134
379	0.242333			3.27177	3.3341
379.5	0.242333			3.26746	3.32532
380	0.242			3.26316	3.30746
380.5	0.241333			3.25887	3.28062
381	0.240667			3.25459	3.25397
381.5	0.240667			3.25033	3.24544
382	0.239333			3.24607	3.20119
382.5	0.238			3.24183	3.15735
383	0.238			3.2376	3.14911
383.5	0.238333			3.23338	3.14971
384	0.239			3.22917	3.15911
384.5	0.237667			3.22497	3.11584
385	0.236667			3.22078	3.08165
385.5	0.236			3.2166	3.05637
386	0.235			3.21244	3.02268
386.5	0.234333			3.20828	2.99778
387	0.234667			3.20413	2.99856
387.5	0.234667			3.2	2.99082
388	0.233667			3.19588	2.95775
388.5	0.233			3.19176	2.93333
389	0.232333			3.18766	2.90908
389.5	0.231333			3.18357	2.87669
390	0.231667			3.17949	2.87759
390.5	0.232			3.17542	2.87849
391	0.231667			3.17136	2.86289
391.5	0.231667			3.16731	2.85558
392	0.231			3.16327	2.83193
392.5	0.230333			3.15924	2.80844
393	0.229667			3.15522	2.78511
393.5	0.229			3.15121	2.76193
394	0.228667			3.14721	2.74691
394.5	0.228333			3.14322	2.73197
395	0.228333			3.13924	2.72506
395.5	0.228			3.13527	2.71024
396	0.227			3.13131	2.67974
396.5	0.227			3.12736	2.67299
397	0.227			3.12343	2.66626
397.5	0.226333			3.1195	2.64395
398	0.224			3.11558	2.58322
398.5	0.224			3.11167	2.57674
399	0.224			3.10777	2.57029
399.5	0.223333			3.10388	2.54862
400	0.222333			3.1	2.51954
400.5	0.221333			3.09613	2.49069
401	0.221333			3.09227	2.48448
401.5	0.221667			3.08842	2.48577
402	0.221333			3.08458	2.47214
402.5	0.221333			3.08075	2.466
403	0.221			3.07692	2.45248
403.5	0.219667			3.07311	2.41698
404	0.22			3.06931	2.41832
404.5	0.218667			3.06551	2.38319
405	0.218667			3.06173	2.37731
405.5	0.218333			3.05795	2.36423
406	0.217667			3.05419	2.34403
406.5	0.217333			3.05043	2.33111
407	0.217333			3.04668	2.32539
407.5	0.216			3.04294	2.29131
408	0.216			3.03922	2.2857
408.5	0.215667			3.0355	2.27307
409	0.215667			3.03178	2.26752
409.5	0.215			3.02808	2.24802
410	0.215			3.02439	2.24254
410.5	0.214333			3.02071	2.22323
411	0.214			3.01703	2.21093
411.5	0.213667			3.01337	2.1987
412	0.213			3.00971	2.1797
412.5	0.213			3.00606	2.17442
413	0.212			3.00242	2.14883
413.5	0.211667			2.99879	2.1369
414	0.211			2.99517	2.11834
414.5	0.211333			2.99156	2.11991
415	0.211667			2.98795	2.12149
415.5	0.210667			2.98436	2.09643
416	0.21			2.98077	2.07818
416.5	0.21			2.97719	2.07319
417	0.209667			2.97362	2.06166
417.5	0.209667			2.97006	2.05673
418	0.209333			2.96651	2.04529
418.5	0.208667			2.96296	2.02743
419	0.207333			2.95943	1.99683
419.5	0.207333			2.9559	1.99207
420	0.206667			2.95238	1.97457
420.5	0.207333			2.94887	1.98261
421	0.207			2.94537	1.97155
421.5	0.206333			2.94187	1.95423
422	0.206333			2.93839	1.9496
422.5	0.205333			2.93491	1.92618
423	0.205			2.93144	1.91539
423.5	0.205667			2.92798	1.92332
424	0.205667			2.92453	1.91879
424.5	0.205			2.92108	1.90188
425	0.204333			2.91765	1.88509
425.5	0.203			2.91422	1.8562
426	0.202667			2.9108	1.84577
426.5	0.203			2.90739	1.8475
427	0.203667			2.90398	1.85531
427.5	0.203			2.90058	1.83887
428	0.202333			2.8972	1.82255
428.5	0.202			2.89382	1.81231
429	0.201333			2.89044	1.79617
429.5	0.200667			2.88708	1.78015
430	0.201			2.88372	1.78191
430.5	0.200333			2.88037	1.766
431	0.201			2.87703	1.77365
431.5	0.200667			2.8737	1.76368
432	0.199667			2.87037	1.74211
432.5	0.198667			2.86705	1.72072
433	0.198667			2.86374	1.71674
433.5	0.198333			2.86044	1.70704
434	0.198333			2.85714	1.70311
434.5	0.197667			2.85386	1.68779
435	0.197667			2.85057	1.68391
435.5	0.197			2.8473	1.66874
436	0.197			2.84404	1.66491
436.5	0.197333			2.84078	1.66672
437	0.196333			2.83753	1.6461
437.5	0.196			2.83429	1.63677
438	0.196			2.83105	1.63303
438.5	0.195667			2.82782	1.62377
439	0.195			2.8246	1.60906
439.5	0.194667			2.82139	1.59991
440	0.194333			2.81818	1.59082
440.5	0.194			2.81498	1.58177
441	0.194333			2.81179	1.58361
441.5	0.194333			2.80861	1.58003
442	0.194			2.80543	1.57105
442.5	0.193333			2.80226	1.55675
443	0.192333			2.7991	1.53721
443.5	0.192333			2.79594	1.53374
444	0.191667			2.79279	1.5197
444.5	0.191667			2.78965	1.51629
445	0.192			2.78652	1.51815
445.5	0.191333			2.78339	1.50424
446	0.191			2.78027	1.49564
446.5	0.191			2.77716	1.4923
447	0.19			2.77405	1.47341
447.5	0.189667			2.77095	1.46496
448	0.189667			2.76786	1.4617
448.5	0.190333			2.76477	1.46871
449	0.189333			2.76169	1.45008
449.5	0.188333			2.75862	1.43162
450	0.188333			2.75556	1.42844
450.5	0.188			2.7525	1.42023
451	0.188333			2.74945	1.42211
451.5	0.188333			2.7464	1.41896
452	0.188333			2.74336	1.41582
452.5	0.187667			2.74033	1.40271
453	0.186667			2.73731	1.38474
453.5	0.185667			2.73429	1.36692
454	0.186			2.73128	1.36882
454.5	0.185667			2.72827	1.36092
455	0.186333			2.72527	1.3677
455.5	0.186			2.72228	1.35982
456	0.184333			2.7193	1.33263
456.5	0.183667			2.71632	1.32011
457	0.184			2.71335	1.32201
457.5	0.184333			2.71038	1.3239
458	0.184667			2.70742	1.3258
458.5	0.185667			2.70447	1.33727
459	0.184667			2.70153	1.32003
459.5	0.183333			2.69859	1.2982
460	0.182667			2.69565	1.28598
460.5	0.182333			2.69273	1.27851
461	0.182			2.6898	1.27108
461.5	0.182333			2.68689	1.27298
462	0.182667			2.68398	1.27487
462.5	0.182333			2.68108	1.26748
463	0.182			2.67819	1.26012
463.5	0.180667			2.6753	1.23905
464	0.180333			2.67241	1.23182
464.5	0.180333			2.66954	1.22917
465	0.181			2.66667	1.23561
465.5	0.181333			2.6638	1.23751
466	0.181			2.66094	1.23032
466.5	0.180333			2.65809	1.21865
467	0.179667			2.65525	1.20707
467.5	0.178667			2.65241	1.19112
468	0.179			2.64957	1.19301
468.5	0.179			2.64674	1.19047
469	0.179			2.64392	1.18793
469.5	0.178667			2.64111	1.18099
470	0.178333			2.6383	1.17409
470.5	0.177667			2.63549	1.16285
471	0.177333			2.6327	1.15603
471.5	0.177			2.6299	1.14925
472	0.176667			2.62712	1.1425
472.5	0.176333			2.62434	1.13579
473	0.177			2.62156	1.14197
473.5	0.177333			2.6188	1.14386
474	0.176667			2.61603	1.13288
474.5	0.176333			2.61328	1.12623
475	0.175333			2.61053	1.11115
475.5	0.175			2.60778	1.1046
476	0.174667			2.60504	1.09809
476.5	0.175			2.60231	1.09997
477	0.174667			2.59958	1.09349
477.5	0.174			2.59686	1.08289
478	0.173667			2.59414	1.07649
478.5	0.173667			2.59143	1.07424
479	0.173667			2.58873	1.072
479.5	0.174			2.58603	1.07387
480	0.174333			2.58333	1.07575
480.5	0.173			2.58065	1.05715
481	0.172667			2.57796	1.05089
481.5	0.172667			2.57529	1.04871
482	0.172333			2.57261	1.0425
482.5	0.172667			2.56995	1.04437
483	0.172667			2.56729	1.04221
483.5	0.172333			2.56463	1.03604
484	0.171			2.56198	1.01796
484.5	0.170667			2.55934	1.01191
485	0.170667			2.5567	1.00982
485.5	0.170667			2.55407	1.00774
486	0.170667			2.55144	1.00567
486.5	0.170333			2.54882	0.999689
487	0.169333			2.5462	0.985958
487.5	0.169667			2.54359	0.987814
488	0.169667			2.54098	0.985791
488.5	0.17			2.53838	0.987643
489	0.169333			2.53579	0.977909
489.5	0.169			2.5332	0.972074
490	0.168667			2.53061	0.966268
490.5	0.168333			2.52803	0.960491
491	0.168			2.52546	0.954744
491.5	0.168333			2.52289	0.956587
492	0.167333			2.52033	0.943335
492.5	0.167			2.51777	0.937674
493	0.167			2.51521	0.935773
493.5	0.166667			2.51266	0.930153
494	0.167333			2.51012	0.935712
494.5	0.167333			2.50758	0.933821
495	0.166333			2.50505	0.92083
495.5	0.166			2.50252	0.915293
496	0.165			2.5	0.902476
496.5	0.165			2.49748	0.900659
497	0.165333			2.49497	0.902484
497.5	0.165			2.49246	0.897042
498	0.165			2.48996	0.895242
498.5	0.164667			2.48746	0.889841
499	0.164667			2.48497	0.888058
499.5	0.164333			2.48248	0.882697
500	0.164			2.48	0.877362
500.5	0.164			2.47752	0.87561
501	0.164333			2.47505	0.877419
501.5	0.164			2.47258	0.872122
502	0.162667			2.47012	0.85629
502.5	0.163			2.46766	0.858093
503	0.163			2.46521	0.856388
503.5	0.162667			2.46276	0.851196
504	0.162333			2.46032	0.84603
504.5	0.162			2.45788	0.84089
505	0.162			2.45545	0.839225
505.5	0.162333			2.45302	0.841016
506	0.161333			2.45059	0.829046
506.5	0.161667			2.44817	0.830832
507	0.161667			2.44576	0.829194
507.5	0.161333			2.44335	0.824152
508	0.161333			2.44094	0.822531
508.5	0.161			2.43854	0.817525
509	0.161			2.43615	0.81592
509.5	0.160667			2.43376	0.810951
510	0.16			2.43137	0.802659
510.5	0.16			2.42899	0.801087
511	0.159667			2.42661	0.796192
511.5	0.159667			2.42424	0.794636
512	0.16			2.42188	0.7964
512.5	0.159333			2.41951	0.788237
513	0.159			2.41715	0.783413
513.5	0.159333			2.4148	0.78517
514	0.159			2.41245	0.780368
514.5	0.158333			2.41011	0.772334
515	0.158			2.40777	0.767593
515.5	0.158			2.40543	0.766105
516	0.158			2.4031	0.764621
516.5	0.158			2.40077	0.763141
517	0.158			2.39845	0.761666
517.5	0.157333			2.39614	0.753793
518	0.157			2.39382	0.749154
518.5	0.156667			2.39151	0.744538
519	0.156333			2.38921	0.739945
519.5	0.156333			2.38691	0.738522
520	0.155333			2.38462	0.727703
520.5	0.155667			2.38232	0.729426
521	0.155667			2.38004	0.728026
521.5	0.155333			2.37776	0.723522
522	0.155333			2.37548	0.722137
522.5	0.155			2.37321	0.717665
523	0.155333			2.37094	0.719378
523.5	0.155			2.36867	0.714926
524	0.154667			2.36641	0.710497
524.5	0.153667			2.36416	0.700003
525	0.154333			2.3619	0.704745
525.5	0.153333			2.35966	0.694319
526	0.153			2.35741	0.68999
526.5	0.153333			2.35518	0.691684
527	0.153333			2.35294	0.690372
527.5	0.153333			2.35071	0.689064
528	0.153333			2.34848	0.687759
528.5	0.153			2.34626	0.683477
529	0.152667			2.34405	0.679217
529.5	0.152333			2.34183	0.674977
530	0.152			2.33962	0.670759
530.5	0.152			2.33742	0.669495
531	0.151333			2.33522	0.662386
531.5	0.151667			2.33302	0.664056
532	0.151667			2.33083	0.662809
532.5	0.151667			2.32864	0.661565
533	0.152			2.32645	0.66323
533.5	0.151			2.32427	0.653305
534	0.150667			2.3221	0.649207
534.5	0.151333			2.31993	0.65374
535	0.150333			2.31776	0.643923
535.5	0.150333			2.31559	0.642722
536	0.149667			2.31343	0.635846
536.5	0.15			2.31128	0.637491
537	0.150333			2.30912	0.639136
537.5	0.149667			2.30698	0.632302
538	0.149			2.30483	0.625517
538.5	0.149			2.30269	0.624356
539	0.149			2.30056	0.623198
539.5	0.148667			2.29842	0.619264
540	0.149			2.2963	0.620892
540.5	0.148667			2.29417	0.616974
541	0.148			2.29205	0.610324
541.5	0.147667			2.28994	0.606456
542	0.147333			2.28782	0.602608
542.5	0.147333			2.28571	0.601497
543	0.147667			2.28361	0.60311
543.5	0.147667			2.28151	0.602001
544	0.147			2.27941	0.595481
544.5	0.147			2.27732	0.594388
545	0.146667			2.27523	0.59061
545.5	0.146333			2.27314	0.586852
546	0.146333			2.27106	0.585777
546.5	0.146333			2.26898	0.584706
547	0.146			2.26691	0.580982
547.5	0.146333			2.26484	0.582572
548	0.146			2.26277	0.578863
548.5	0.146			2.26071	0.577808
549	0.145333			2.25865	0.571501
549.5	0.145333			2.2566	0.570461
550	0.145			2.25455	0.566816
550.5	0.145667			2.2525	0.571001
551	0.144667			2.25045	0.562167
551.5	0.145			2.24841	0.563737
552	0.144667			2.24638	0.560132
552.5	0.145			2.24434	0.561698
553	0.144333			2.24231	0.555539
553.5	0.144333			2.24029	0.554535
554	0.143667			2.23827	0.548433
554.5	0.144			2.23625	0.549988
555	0.144			2.23423	0.548997
555.5	0.143667			2.23222	0.545475
556	0.143667			2.23022	0.544495
556.5	0.142667			2.22821	0.535977
557	0.142667			2.22621	0.535015
557.5	0.143			2.22422	0.536554
558	0.143			2.22222	0.535593
558.5	0.143333			2.22023	0.53713
559	0.143			2.21825	0.533678
559.5	0.142667			2.21626	0.530244
560	0.142333			2.21429	0.526827
560.5	0.142			2.21231	0.523428
561	0.141667			2.21034	0.520045
561.5	0.142			2.20837	0.521565
562	0.142333			2.20641	0.523085
562.5	0.141667			2.20444	0.517275
563	0.141333			2.20249	0.51393
563.5	0.141333			2.20053	0.513018
564	0.141333			2.19858	0.512109
564.5	0.141333			2.19663	0.511202
565	0.140667			2.19469	0.505495
565.5	0.140667			2.19275	0.504601
566	0.140667			2.19081	0.50371
566.5	0.140333			2.18888	0.500441
567	0.14			2.18695	0.497189
567.5	0.140333			2.18502	0.498679
568	0.139667			2.1831	0.493083
568.5	0.14			2.18118	0.494568
569	0.139667			2.17926	0.491351
569.5	0.139667			2.17735	0.490489
570	0.139333			2.17544	0.487295
570.5	0.139333			2.17353	0.486441
571	0.139333			2.17163	0.485589
571.5	0.139			2.16973	0.482423
572	0.138667			2.16783	0.479273
572.5	0.139			2.16594	0.48074
573	0.138333			2.16405	0.475309
573.5	0.138333			2.16216	0.47448
574	0.138667			2.16028	0.475939
574.5	0.138333			2.1584	0.47283
575	0.138			2.15652	0.469736
575.5	0.137667			2.15465	0.466657
576	0.137333			2.15278	0.463594
576.5	0.137667			2.15091	0.46504
577	0.137667			2.14905	0.464234
577.5	0.137			2.14719	0.458953
578	0.136667			2.14533	0.455933
578.5	0.136667			2.14347	0.455145
579	0.137			2.14162	0.456578
579.5	0.136667			2.13978	0.453575
580	0.136667			2.13793	0.452794
580.5	0.136667			2.13609	0.452014
581	0.136333			2.13425	0.449038
581.5	0.136			2.13242	0.446077
582	0.135667			2.13058	0.44313
582.5	0.136			2.12876	0.444547
583	0.135667			2.12693	0.441612
583.5	0.135333			2.12511	0.438691
584	0.135333			2.12329	0.43794
584.5	0.135333			2.12147	0.437192
585	0.135333			2.11966	0.436445
585.5	0.134667			2.11785	0.431417
586	0.134333			2.11604	0.428552
586.5	0.134333			2.11424	0.427822
587	0.133667			2.11244	0.422865
587.5	0.134			2.11064	0.424253
588	0.134			2.10884	0.423532
588.5	0.133667			2.10705	0.420712
589	0.133333			2.10526	0.417906
589.5	0.133333			2.10348	0.417197
590	0.133333			2.10169	0.41649
590.5	0.133333			2.09992	0.415785
591	0.133333			2.09814	0.415082
591.5	0.133			2.09637	0.412311
592	0.132667			2.09459	0.409554
592.5	0.132667			2.09283	0.408863
593	0.132333			2.09106	0.406126
593.5	0.132333			2.0893	0.405442
594	0.132			2.08754	0.402723
594.5	0.131333			2.08579	0.397995
595	0.131667			2.08403	0.399346
595.5	0.131667			2.08228	0.398675
596	0.131667			2.08054	0.398007
596.5	0.131667			2.07879	0.39734
597	0.131			2.07705	0.392668
597.5	0.131333			2.07531	0.394008
598	0.131			2.07358	0.391356
598.5	0.130667			2.07185	0.388716
599	0.130333			2.07012	0.38609
599.5	0.130333			2.06839	0.385446
600	0.130333			2.06667	0.384804
600.5	0.130333			2.06495	0.384164
601	0.13			2.06323	0.381565
601.5	0.13			2.06151	0.380931
602	0.13			2.0598	0.380299
602.5	0.130333			2.05809	0.381617
603	0.129333			2.05638	0.375161
603.5	0.129333			2.05468	0.37454
604	0.129333			2.05298	0.37392
604.5	0.129333			2.05128	0.373301
605	0.129			2.04959	0.370766
605.5	0.129			2.04789	0.370154
606	0.129			2.0462	0.369543
606.5	0.129			2.04452	0.368934
607	0.129			2.04283	0.368327
607.5	0.128333			2.04115	0.36393
608	0.128667			2.03947	0.365221
608.5	0.128333			2.0378	0.362735
609	0.128			2.03612	0.36026
609.5	0.127667			2.03445	0.357799
610	0.127333			2.03279	0.35535
610.5	0.127333			2.03112	0.354768
611	0.127667			2.02946	0.356044
611.5	0.127333			2.0278	0.353608
612	0.127333			2.02614	0.353031
612.5	0.127			2.02449	0.350612
613	0.127333			2.02284	0.35188
613.5	0.127			2.02119	0.34947
614	0.126667			2.01954	0.347072
614.5	0.127			2.0179	0.348333
615	0.126667			2.01626	0.345944
615.5	0.127			2.01462	0.347202
616	0.126667			2.01299	0.344822
616.5	0.126			2.01135	0.340648
617	0.126			2.00972	0.340096
617.5	0.126			2.0081	0.339546
618	0.126			2.00647	0.338997
618.5	0.125667			2.00485	0.33666
619	0.126			2.00323	0.337902
619.5	0.125667			2.00161	0.335574
620	0.125			2	0.331488
620.5	0.125			1.99839	0.330954
621	0.125			1.99678	0.330421
621.5	0.125			1.99517	0.32989
622	0.125			1.99357	0.32936
622.5	0.125			1.99197	0.328831
623	0.125			1.99037	0.328303
623.5	0.125			1.98877	0.327777
624	0.125			1.98718	0.327252
624.5	0.124667			1.98559	0.324988
625	0.124333			1.984	0.322735
625.5	0.124333			1.98241	0.322219
626	0.124333			1.98083	0.321705
626.5	0.124			1.97925	0.319472
627	0.123667			1.97767	0.31725
627.5	0.123			1.9761	0.313339
628	0.123667			1.97452	0.31624
628.5	0.123667			1.97295	0.315737
629	0.123667			1.97138	0.315236
629.5	0.123667			1.96982	0.314735
630	0.124			1.96825	0.315932
630.5	0.123333			1.96669	0.312048
631	0.123333			1.96513	0.311554
631.5	0.123			1.96358	0.309382
632	0.122667			1.96203	0.307221
632.5	0.122667			1.96047	0.306735
633	0.122333			1.95893	0.304588
633.5	0.121667			1.95738	0.300802
634	0.122			1.95584	0.301976
634.5	0.122667			1.95429	0.304804
635	0.122667			1.95276	0.304325
635.5	0.122333			1.95122	0.302197
636	0.121667			1.94969	0.298442
636.5	0.122			1.94815	0.299608
637	0.121333			1.94662	0.295878
637.5	0.121333			1.9451	0.295414
638	0.121667			1.94357	0.296574
638.5	0.121667			1.94205	0.29611
639	0.121333			1.94053	0.294029
639.5	0.121333			1.93901	0.293569
640	0.121			1.9375	0.291502
640.5	0.120667			1.93599	0.289446
641	0.121			1.93448	0.290594
641.5	0.120333			1.93297	0.286952
642	0.12			1.93146	0.28492
642.5	0.120333			1.92996	0.28606
643	0.121			1.92846	0.288789
643.5	0.120333			1.92696	0.285171
644	0.12			1.92547	0.283154
644.5	0.12			1.92397	0.282714
645	0.12			1.92248	0.282276
645.5	0.12			1.92099	0.281839
646	0.119333			1.9195	0.278285
646.5	0.119333			1.91802	0.277855
647	0.119			1.91654	0.275878
647.5	0.119			1.91506	0.275452
648	0.118667			1.91358	0.273488
648.5	0.119			1.9121	0.274603
649	0.119			1.91063	0.27418
649.5	0.119333			1.90916	0.275294
650	0.119			1.90769	0.273337
650.5	0.118333			1.90623	0.269868
651	0.119			1.90476	0.272498
651.5	0.118667			1.9033	0.270558
652	0.118667			1.90184	0.270143
652.5	0.118667			1.90038	0.269729
653	0.118			1.89893	0.266299
653.5	0.118333			1.89748	0.267396
654	0.118			1.89602	0.265485
654.5	0.117667			1.89458	0.263584
655	0.118			1.89313	0.264675
655.5	0.117333			1.89169	0.261294
656	0.117667			1.89024	0.26238
656.5	0.117333			1.8888	0.260498
657	0.117333			1.88737	0.260102
657.5	0.117333			1.88593	0.259706
658	0.117			1.8845	0.257841
658.5	0.117			1.88307	0.257449
659	0.117			1.88164	0.257059
659.5	0.117			1.88021	0.256669
660	0.116667			1.87879	0.254822
660.5	0.116667			1.87737	0.254436
661	0.116333			1.87595	0.252602
661.5	0.116333			1.87453	0.25222
662	0.115667			1.87311	0.248961
662.5	0.115667			1.8717	0.248586
663	0.115667			1.87029	0.248211
663.5	0.115333			1.86888	0.24641
664	0.115667			1.86747	0.247464
664.5	0.115333			1.86606	0.245669
665	0.115333			1.86466	0.2453
665.5	0.115			1.86326	0.243518
666	0.115667			1.86186	0.24598
666.5	0.115			1.86047	0.242788
667	0.116			1.85907	0.246658
667.5	0.115333			1.85768	0.243466
668	0.114667			1.85629	0.240299
668.5	0.115333			1.8549	0.242738
669	0.114667			1.85351	0.239582
669.5	0.114667			1.85213	0.239224
670	0.114667			1.85075	0.238867
670.5	0.114333			1.84937	0.237126
671	0.114333			1.84799	0.236773
671.5	0.114333			1.84661	0.23642
672	0.114333			1.84524	0.236069
672.5	0.114333			1.84387	0.235718
673	0.114333			1.8425	0.235368
673.5	0.113667			1.84113	0.232286
674	0.113667			1.83976	0.231941
674.5	0.114			1.8384	0.232958
675	0.113333			1.83704	0.2299
675.5	0.113333			1.83568	0.22956
676	0.113333			1.83432	0.22922
676.5	0.113			1.83296	0.227537
677	0.113333			1.83161	0.228544
677.5	0.113667			1.83026	0.229551
678	0.113333			1.82891	0.22787
678.5	0.112667			1.82756	0.224865
679	0.112667			1.82622	0.224534
679.5	0.112667			1.82487	0.224204
680	0.112667			1.82353	0.223874
680.5	0.112667			1.82219	0.223545
681	0.112333			1.82085	0.221898
681.5	0.112667			1.81952	0.22289
682	0.112333			1.81818	0.221248
682.5	0.112			1.81685	0.219615
683	0.111333			1.81552	0.216691
683.5	0.112			1.81419	0.218973
684	0.112			1.81287	0.218653
684.5	0.112			1.81154	0.218334
685	0.111667			1.81022	0.216719
685.5	0.111667			1.8089	0.216403
686	0.111667			1.80758	0.216088
686.5	0.112			1.80626	0.217063
687	0.111333			1.80495	0.214175
687.5	0.111333			1.80364	0.213863
688	0.111333			1.80233	0.213553
688.5	0.111			1.80102	0.211968
689	0.111333			1.79971	0.212933
689.5	0.111333			1.7984	0.212624
690	0.111333			1.7971	0.212316
690.5	0.111			1.7958	0.210741
691	0.111333			1.7945	0.211702
691.5	0.111			1.7932	0.210132
692	0.110667			1.79191	0.20857
692.5	0.111			1.79061	0.209526
693	0.110333			1.78932	0.206718
693.5	0.110333			1.78803	0.20642
694	0.11			1.78674	0.204879
694.5	0.11			1.78546	0.204584
695	0.110333			1.78417	0.20553
695.5	0.11			1.78289	0.203996
696	0.110333			1.78161	0.20494
696.5	0.110333			1.78033	0.204646
697	0.109667			1.77905	0.20189
697.5	0.109667			1.77778	0.201601
698	0.110333			1.7765	0.203767
698.5	0.109333			1.77523	0.199804
699	0.109333			1.77396	0.199518
699.5	0.109333			1.77269	0.199233
700	0.108667			1.77143	0.19653
700.5	0.109			1.77016	0.197455
701	0.108667			1.7689	0.195969
701.5	0.108667			1.76764	0.19569
702	0.108333			1.76638	0.194214
702.5	0.108333			1.76512	0.193938
703	0.108333			1.76387	0.193662
703.5	0.108333			1.76262	0.193387
704	0.108			1.76136	0.191926
704.5	0.108667			1.76011	0.194027
705	0.108333			1.75887	0.192565
705.5	0.108667			1.75762	0.193477
706	0.108667			1.75637	0.193203
706.5	0.108			1.75513	0.19057
707	0.108			1.75389	0.190301
707.5	0.107667			1.75265	0.18886
708	0.108333			1.75141	0.190936
708.5	0.108			1.75018	0.189496
709	0.107667			1.74894	0.188062
709.5	0.107667			1.74771	0.187797
710	0.107667			1.74648	0.187533
710.5	0.107333			1.74525	0.186111
711	0.107333			1.74402	0.185849
711.5	0.107667			1.7428	0.186743
712	0.107333			1.74157	0.185328
712.5	0.107333			1.74035	0.185068
713	0.106667			1.73913	0.18252
713.5	0.106667			1.73791	0.182264
714	0.107			1.73669	0.183148
714.5	0.106667			1.73548	0.181754
715	0.106667			1.73427	0.1815
715.5	0.107			1.73305	0.182381
716	0.106667			1.73184	0.180993
716.5	0.107333			1.73064	0.183007
717	0.107333			1.72943	0.182752
717.5	0.106667			1.72822	0.180237
718	0.106			1.72702	0.177744
718.5	0.106333			1.72582	0.178614
719	0.106667			1.72462	0.179486
719.5	0.106333			1.72342	0.178118
720	0.107			1.72222	0.180108
720.5	0.106667			1.72103	0.17874
721	0.106			1.71983	0.176268
721.5	0.105			1.71864	0.172718
722	0.105333			1.71745	0.173576
722.5	0.105667			1.71626	0.174434
723	0.105667			1.71508	0.174193
723.5	0.105667			1.71389	0.173952
724	0.106			1.71271	0.17481
724.5	0.105667			1.71153	0.173472
725	0.106			1.71034	0.174328
725.5	0.106			1.70917	0.174088
726	0.105667			1.70799	0.172756
726.5	0.105333			1.70681	0.171432
727	0.105667			1.70564	0.172281
727.5	0.105333			1.70447	0.170961
728	0.105667			1.7033	0.171808
728.5	0.105			1.70213	0.169415
729	0.104333			1.70096	0.167041
729.5	0.105			1.69979	0.16895
730	0.105			1.69863	0.168719
730.5	0.105			1.69747	0.168488
731	0.104333			1.69631	0.166128
731.5	0.104667			1.69515	0.166963
732	0.104333			1.69399	0.165674
732.5	0.105			1.69283	0.167569
733	0.105			1.69168	0.167341
733.5	0.105			1.69052	0.167113
734	0.104667			1.68937	0.165827
734.5	0.104667			1.68822	0.165602
735	0.104667			1.68707	0.165376
735.5	0.105			1.68593	0.166205
736	0.104			1.68478	0.162833
736.5	0.104			1.68364	0.162612
737	0.104			1.6825	0.162391
737.5	0.103667			1.68136	0.161133
738	0.103333			1.68022	0.159882
738.5	0.103333			1.67908	0.159666
739	0.103667			1.67794	0.16048
739.5	0.103333			1.67681	0.159234
740	0.103333			1.67568	0.159019
740.5	0.102667			1.67454	0.156762
741	0.102			1.67341	0.154524
741.5	0.102333			1.67229	0.155326
742	0.102333			1.67116	0.155116
742.5	0.103			1.67003	0.156932
743	0.102667			1.66891	0.155709
743.5	0.102333			1.66779	0.154491
744	0.102333			1.66667	0.154284
744.5	0.102667			1.66555	0.155082
745	0.102667			1.66443	0.154874
745.5	0.102333			1.66331	0.153663
746	0.102667			1.6622	0.154459
746.5	0.102333			1.66109	0.153252
747	0.102333			1.65997	0.153047
747.5	0.102333			1.65886	0.152842
748	0.101333			1.65775	0.149669
748.5	0.101333			1.65665	0.149469
749	0.101667			1.65554	0.150254
749.5	0.102			1.65444	0.151039
750	0.101667			1.65333	0.149853
750.5	0.102			1.65223	0.150636
751	0.101667			1.65113	0.149454
751.5	0.101333			1.65003	0.148278
752	0.101			1.64894	0.147109
752.5	0.101			1.64784	0.146913
753	0.101			1.64675	0.146718
753.5	0.101667			1.64565	0.148464
754	0.101333			1.64456	0.147297
754.5	0.101			1.64347	0.146135
755	0.101667			1.64238	0.147875
755.5	0.101			1.6413	0.145749
756	0.100667			1.64021	0.144597
756.5	0.1			1.63913	0.1425
757	0.0996667			1.63804	0.141364
757.5	0.100667			1.63696	0.144025
758	0.100333			1.63588	0.142884
758.5	0.100333			1.63481	0.142696
759	0.100667			1.63373	0.143456
759.5	0.100333			1.63265	0.14232
760	0.100667			1.63158	0.143079
760.5	0.100333			1.63051	0.141946
761	0.1			1.62943	0.140819
761.5	0.1			1.62837	0.140634
762	0.0996667			1.6273	0.139515
762.5	0.1			1.62623	0.140266
763	0.0993333			1.62516	0.13822
763.5	0.099			1.6241	0.137115
764	0.099			1.62304	0.136935
764.5	0.0993333			1.62198	0.137679
765	0.0993333			1.62092	0.137499
765.5	0.0996667			1.61986	0.138242
766	0.0993333			1.6188	0.13714
766.5	0.099			1.61774	0.136043
767	0.0986667			1.61669	0.134953
767.5	0.099			1.61564	0.135689
768	0.1			1.61458	0.138264
768.5	0.0993333			1.61353	0.136249
769	0.0993333			1.61248	0.136072
769.5	0.0996667			1.61144	0.136809
770	0.0996667			1.61039	0.136631
770.5	0.0996667			1.60934	0.136454
771	0.0993333			1.6083	0.135367
771.5	0.0993333			1.60726	0.135192
772	0.099			1.60622	0.134112
772.5	0.098			1.60518	0.131246
773	0.0986667			1.60414	0.132866
773.5	0.0986667			1.6031	0.132694
774	0.0983333			1.60207	0.131629
774.5	0.0976667			1.60103	0.129682
775	0.0983333			1.6	0.131289
775.5	0.0973333			1.59897	0.128467
776	0.098			1.59794	0.130065
776.5	0.0976667			1.59691	0.129015
777	0.097			1.59588	0.127096
777.5	0.0973333			1.59486	0.127807
778	0.0973333			1.59383	0.127642
778.5	0.0976667			1.59281	0.128353
779	0.0973333			1.59178	0.127315
779.5	0.0973333			1.59076	0.127152
780	0.0976667			1.58974	0.12786
780.5	0.0976667			1.58873	0.127696
781	0.097			1.58771	0.125798
781.5	0.097			1.58669	0.125637
782	0.097			1.58568	0.125476
782.5	0.097			1.58466	0.125316
783	0.0966667			1.58365	0.124297
783.5	0.0966667			1.58264	0.124139
784	0.0973333			1.58163	0.125696
784.5	0.0973333			1.58062	0.125536
785	0.0963333			1.57962	0.122813
785.5	0.0963333			1.57861	0.122657
786	0.0966667			1.57761	0.12335
786.5	0.096			1.57661	0.1215
787	0.0963333			1.5756	0.12219
787.5	0.096			1.5746	0.121192
788	0.0966667			1.5736	0.122725
788.5	0.0963333			1.57261	0.121725
789	0.0956667			1.57161	0.119894
789.5	0.097			1.57061	0.123104
790	0.0963333			1.56962	0.121264
790.5	0.0966667			1.56863	0.12195
791	0.0963333			1.56764	0.120957
791.5	0.096			1.56665	0.11997
792	0.0956667			1.56566	0.118988
792.5	0.0953333			1.56467	0.118011
793	0.0946667			1.56368	0.11622
793.5	0.0956667			1.5627	0.118538
794	0.096			1.56171	0.119215
794.5	0.0956667			1.56073	0.11824
795	0.0956667			1.55975	0.118091
795.5	0.0953333			1.55877	0.117123
796	0.095			1.55779	0.116159
796.5	0.095			1.55681	0.116013
797	0.0946667			1.55583	0.115056
797.5	0.0946667			1.55486	0.114912
798	0.0946667			1.55388	0.114768
798.5	0.0946667			1.55291	0.114624
799	0.095			1.55194	0.115288
799.5	0.095			1.55097	0.115144
800	0.0943333			1.55	0.113392

## Sheet: Raw_Data_Figure_2_a_b
Raw Data_Figure 2_b									Raw_Data_Figure 2_a
λ (cm-1)	PES (Transmittance)	TFC(Transmittance)	TFN(Transmittance)						λ (cm-1)	TiO2 NPs (Transmittance)	Oil Extract (Transmittance)
4996.91	1.00432	0.99797	0.99915						4997.76	0.99918	0.99117
4994.98	1.00432	0.99797	0.99915						4995.83	0.99918	0.99117
4993.05	1.00432	0.99797	0.99915						4993.9	0.99918	0.99117
4991.12	1.00432	0.99797	0.99915						4991.97	0.99918	0.99117
4989.2	1.00432	0.99797	0.99915						4990.04	0.99918	0.99117
4987.27	1.00432	0.99797	0.99915						4988.11	0.99918	0.99117
4985.34	1.00432	0.99797	0.99915						4986.18	0.99918	0.99117
4983.41	1.00432	0.99797	0.99915						4984.26	0.99918	0.99117
4981.48	1.00432	0.99797	0.99915						4982.33	0.99918	0.99117
4979.55	1.00432	0.99797	0.99915						4980.4	0.99918	0.99117
4977.62	1.00432	0.99797	0.99915						4978.47	0.99918	0.99117
4975.7	1.00432	0.99797	0.99915						4976.54	0.99918	0.99117
4973.77	1.00432	0.99797	0.99915						4974.61	0.99918	0.99117
4971.84	1.00429	0.99798	0.99911						4972.68	0.99925	0.99119
4969.91	1.00426	0.99799	0.99907						4970.75	0.99933	0.99118
4967.98	1.00422	0.998	0.99903						4968.82	0.99938	0.99118
4966.05	1.00419	0.99801	0.999						4966.9	0.99941	0.99118
4964.12	1.00415	0.99803	0.99899						4964.97	0.99942	0.99117
4962.2	1.00411	0.99804	0.99901						4963.04	0.99941	0.99119
4960.27	1.00408	0.99806	0.99904						4961.11	0.9994	0.99125
4958.34	1.00405	0.99808	0.99906						4959.18	0.99939	0.99136
4956.41	1.00401	0.99809	0.99905						4957.25	0.99937	0.99148
4954.48	1.00397	0.99811	0.99902						4955.32	0.99935	0.99157
4952.55	1.00394	0.99811	0.999						4953.39	0.99933	0.99163
4950.62	1.0039	0.99812	0.99899						4951.46	0.99933	0.99168
4948.7	1.00387	0.99813	0.999						4949.54	0.99932	0.99175
4946.77	1.00385	0.99814	0.99901						4947.61	0.99932	0.99182
4944.84	1.00384	0.99815	0.99906						4945.68	0.99934	0.99187
4942.91	1.00383	0.99816	0.99912						4943.75	0.99939	0.99188
4940.98	1.00382	0.99817	0.9992						4941.82	0.99942	0.9919
4939.05	1.00382	0.99818	0.99928						4939.89	0.99943	0.9919
4937.12	1.00382	0.99819	0.99934						4937.96	0.99945	0.99189
4935.2	1.00382	0.9982	0.99936						4936.03	0.99949	0.99188
4933.27	1.00383	0.99821	0.99934						4934.1	0.99954	0.99189
4931.34	1.00383	0.99821	0.9993						4932.18	0.99958	0.99194
4929.41	1.00384	0.99823	0.99925						4930.25	0.99963	0.992
4927.48	1.00385	0.99824	0.99924						4928.32	0.99967	0.99203
4925.55	1.00387	0.99825	0.99923						4926.39	0.9997	0.99205
4923.62	1.0039	0.99827	0.99923						4924.46	0.99969	0.99208
4921.7	1.00392	0.99829	0.99921						4922.53	0.99967	0.99212
4919.77	1.00395	0.99831	0.99921						4920.6	0.99966	0.99216
4917.84	1.00397	0.99833	0.99925						4918.67	0.99966	0.99221
4915.91	1.00399	0.99836	0.99934						4916.74	0.99966	0.99226
4913.98	1.004	0.99838	0.99942						4914.82	0.99964	0.99229
4912.05	1.004	0.99839	0.99948						4912.89	0.99959	0.99232
4910.13	1.004	0.99841	0.99951						4910.96	0.99954	0.99233
4908.2	1.00399	0.99842	0.99951						4909.03	0.99951	0.99234
4906.27	1.00399	0.99844	0.99947						4907.1	0.99947	0.99232
4904.34	1.00399	0.99846	0.99945						4905.17	0.99943	0.9923
4902.41	1.004	0.99848	0.99946						4903.24	0.99942	0.99233
4900.48	1.004	0.9985	0.99951						4901.31	0.99945	0.99239
4898.55	1.004	0.99851	0.99955						4899.38	0.9995	0.99245
4896.63	1.004	0.99851	0.99956						4897.46	0.99953	0.99248
4894.7	1.00399	0.9985	0.99954						4895.53	0.99953	0.99248
4892.77	1.00398	0.99848	0.99955						4893.6	0.99955	0.99247
4890.84	1.00398	0.99846	0.99956						4891.67	0.9996	0.99249
4888.91	1.00397	0.99844	0.99954						4889.74	0.99962	0.99253
4886.98	1.00397	0.99841	0.9995						4887.81	0.99962	0.99258
4885.05	1.00397	0.99839	0.99944						4885.88	0.99963	0.99263
4883.13	1.00398	0.99837	0.99941						4883.95	0.99966	0.99269
4881.2	1.00399	0.99835	0.99939						4882.02	0.99968	0.99274
4879.27	1.00401	0.99833	0.99936						4880.09	0.99967	0.9928
4877.34	1.00402	0.99831	0.99933						4878.17	0.99965	0.99285
4875.41	1.00403	0.9983	0.99932						4876.24	0.99961	0.99289
4873.48	1.00404	0.99829	0.99933						4874.31	0.99955	0.99293
4871.55	1.00404	0.99829	0.99934						4872.38	0.9995	0.99296
4869.63	1.00403	0.99828	0.99936						4870.45	0.99948	0.99295
4867.7	1.00403	0.99828	0.99941						4868.52	0.99948	0.99291
4865.77	1.00403	0.9983	0.99945						4866.59	0.99947	0.99289
4863.84	1.00403	0.99832	0.99948						4864.66	0.99942	0.99288
4861.91	1.00403	0.99835	0.99951						4862.73	0.99934	0.99286
4859.98	1.00402	0.99838	0.99954						4860.81	0.99926	0.99282
4858.05	1.00401	0.99841	0.99959						4858.88	0.99923	0.99277
4856.13	1.00398	0.99844	0.99966						4856.95	0.99924	0.99275
4854.2	1.00394	0.99845	0.99971						4855.02	0.99925	0.99274
4852.27	1.00389	0.99846	0.99972						4853.09	0.99924	0.99273
4850.34	1.00384	0.99847	0.99971						4851.16	0.99923	0.99271
4848.41	1.00379	0.99847	0.99971						4849.23	0.99923	0.99269
4846.48	1.00374	0.99846	0.99971						4847.3	0.99926	0.99269
4844.55	1.00369	0.99846	0.99968						4845.37	0.99929	0.99268
4842.63	1.00364	0.99845	0.99963						4843.45	0.99932	0.99266
4840.7	1.00361	0.99845	0.9996						4841.52	0.99934	0.99262
4838.77	1.00359	0.99845	0.99961						4839.59	0.99937	0.99261
4836.84	1.00359	0.99846	0.99962						4837.66	0.9994	0.99261
4834.91	1.0036	0.99847	0.99962						4835.73	0.9994	0.99262
4832.98	1.00361	0.99848	0.9996						4833.8	0.9994	0.99265
4831.05	1.00364	0.9985	0.99956						4831.87	0.99937	0.99269
4829.13	1.00367	0.99851	0.99953						4829.94	0.99933	0.99275
4827.2	1.00371	0.99852	0.99951						4828.01	0.9993	0.9928
4825.27	1.00375	0.99854	0.99952						4826.09	0.99932	0.99286
4823.34	1.00379	0.99855	0.99958						4824.16	0.99936	0.99293
4821.41	1.00384	0.99858	0.99966						4822.23	0.99938	0.99301
4819.48	1.00389	0.99861	0.99972						4820.3	0.99936	0.99309
4817.55	1.00393	0.99864	0.99977						4818.37	0.99931	0.99312
4815.63	1.00396	0.99866	0.9998						4816.44	0.99924	0.99309
4813.7	1.00398	0.99868	0.9998						4814.51	0.99919	0.99305
4811.77	1.00398	0.99869	0.99978						4812.58	0.99916	0.99302
4809.84	1.00397	0.99869	0.99977						4810.65	0.99911	0.99303
4807.91	1.00394	0.99869	0.99975						4808.73	0.99903	0.99306
4805.98	1.00391	0.99867	0.99972						4806.8	0.99897	0.99307
4804.05	1.00386	0.99865	0.99969						4804.87	0.99894	0.9931
4802.13	1.00381	0.99862	0.99965						4802.94	0.99895	0.99313
4800.2	1.00376	0.99859	0.99961						4801.01	0.99896	0.99315
4798.27	1.0037	0.99856	0.99955						4799.08	0.99899	0.99317
4796.34	1.00365	0.99853	0.9995						4797.15	0.99902	0.99318
4794.41	1.0036	0.99851	0.99946						4795.22	0.99907	0.9932
4792.48	1.00356	0.99848	0.99942						4793.29	0.99912	0.99321
4790.55	1.00353	0.99846	0.99939						4791.37	0.99916	0.99322
4788.63	1.0035	0.99843	0.99936						4789.44	0.99919	0.99324
4786.7	1.00348	0.9984	0.99935						4787.51	0.99922	0.99327
4784.77	1.00347	0.99837	0.99935						4785.58	0.99926	0.9933
4782.84	1.00346	0.99834	0.99939						4783.65	0.99931	0.99332
4780.91	1.00346	0.99831	0.99942						4781.72	0.99936	0.99335
4778.98	1.00347	0.99828	0.99942						4779.79	0.99942	0.9934
4777.05	1.0035	0.99827	0.99941						4777.86	0.99945	0.99345
4775.13	1.00353	0.99826	0.9994						4775.93	0.99945	0.99349
4773.2	1.00357	0.99826	0.9994						4774.01	0.99942	0.99349
4771.27	1.00361	0.99826	0.9994						4772.08	0.99936	0.99346
4769.34	1.00364	0.99826	0.99939						4770.15	0.99929	0.99342
4767.41	1.00366	0.99826	0.99937						4768.22	0.99924	0.99338
4765.48	1.00368	0.99827	0.99937						4766.29	0.99918	0.99336
4763.55	1.00368	0.99828	0.99939						4764.36	0.9991	0.99336
4761.63	1.00368	0.99828	0.99942						4762.43	0.99903	0.99337
4759.7	1.00366	0.99828	0.99944						4760.5	0.999	0.99338
4757.77	1.00363	0.99828	0.99946						4758.57	0.99897	0.99341
4755.84	1.0036	0.99829	0.99947						4756.65	0.99892	0.99345
4753.91	1.00356	0.9983	0.99945						4754.72	0.99885	0.99349
4751.98	1.00351	0.99831	0.99943						4752.79	0.99879	0.99354
4750.05	1.00347	0.99832	0.99942						4750.86	0.99875	0.99358
4748.13	1.00343	0.99835	0.99942						4748.93	0.99872	0.99362
4746.2	1.00339	0.99837	0.99944						4747	0.99872	0.99366
4744.27	1.00337	0.99839	0.99944						4745.07	0.99873	0.9937
4742.34	1.00335	0.99841	0.99943						4743.14	0.99879	0.99373
4740.41	1.00334	0.99843	0.99942						4741.21	0.99889	0.99375
4738.48	1.00335	0.99844	0.99942						4739.29	0.999	0.99376
4736.55	1.00338	0.99846	0.99944						4737.36	0.99907	0.99378
4734.63	1.00342	0.99848	0.99944						4735.43	0.99913	0.9938
4732.7	1.00347	0.9985	0.99944						4733.5	0.99917	0.99382
4730.77	1.00354	0.99853	0.99944						4731.57	0.99919	0.99385
4728.84	1.00362	0.99855	0.99946						4729.64	0.99922	0.99385
4726.91	1.0037	0.99857	0.99948						4727.71	0.99927	0.99382
4724.98	1.00377	0.99858	0.99949						4725.78	0.99935	0.99377
4723.05	1.00383	0.99859	0.9995						4723.85	0.99942	0.99372
4721.13	1.00389	0.99858	0.99953						4721.93	0.99946	0.9937
4719.2	1.00393	0.99857	0.99959						4720	0.99946	0.9937
4717.27	1.00396	0.99854	0.99964						4718.07	0.99945	0.9937
4715.34	1.00398	0.99851	0.99971						4716.14	0.99942	0.99368
4713.41	1.00398	0.99846	0.99978						4714.21	0.9994	0.99366
4711.48	1.00397	0.99842	0.99983						4712.28	0.99937	0.99364
4709.55	1.00394	0.99837	0.99985						4710.35	0.99934	0.99363
4707.63	1.00391	0.99833	0.99983						4708.42	0.99931	0.99365
4705.7	1.00388	0.99829	0.99982						4706.49	0.99929	0.99368
4703.77	1.00383	0.99826	0.99982						4704.57	0.9993	0.99372
4701.84	1.00379	0.99823	0.9998						4702.64	0.99933	0.99376
4699.91	1.00375	0.9982	0.99978						4700.71	0.99934	0.9938
4697.98	1.00371	0.99818	0.99978						4698.78	0.99933	0.99384
4696.05	1.00367	0.99816	0.99981						4696.85	0.99933	0.99389
4694.13	1.00363	0.99815	0.99986						4694.92	0.99934	0.99394
4692.2	1.0036	0.99815	0.99988						4692.99	0.99934	0.99397
4690.27	1.00357	0.99816	0.99989						4691.06	0.99933	0.99399
4688.34	1.00355	0.99818	0.99988						4689.13	0.99933	0.99401
4686.41	1.00354	0.99822	0.99984						4687.21	0.99935	0.99403
4684.48	1.00352	0.99825	0.99981						4685.28	0.99937	0.99405
4682.55	1.00351	0.99828	0.99978						4683.35	0.99938	0.99408
4680.63	1.00349	0.99831	0.99978						4681.42	0.99939	0.99411
4678.7	1.00346	0.99833	0.9998						4679.49	0.9994	0.99414
4676.77	1.00344	0.99835	0.99984						4677.56	0.9994	0.99417
4674.84	1.00342	0.99835	0.9999						4675.63	0.99939	0.99421
4672.91	1.00339	0.99836	0.99993						4673.7	0.99936	0.99425
4670.98	1.00336	0.99836	0.99994						4671.77	0.99933	0.99424
4669.05	1.00334	0.99835	0.99993						4669.85	0.99929	0.99419
4667.13	1.00332	0.99835	0.99991						4667.92	0.99927	0.99414
4665.2	1.00331	0.99835	0.99986						4665.99	0.99927	0.99409
4663.27	1.0033	0.99835	0.99981						4664.06	0.99926	0.99404
4661.34	1.0033	0.99834	0.99977						4662.13	0.99923	0.99397
4659.41	1.0033	0.99834	0.99976						4660.2	0.9992	0.9939
4657.48	1.00331	0.99835	0.99975						4658.27	0.99919	0.99382
4655.55	1.00333	0.99835	0.99975						4656.34	0.99918	0.99375
4653.63	1.00334	0.99836	0.99977						4654.41	0.99916	0.99372
4651.7	1.00336	0.99836	0.9998						4652.49	0.99916	0.9937
4649.77	1.00339	0.99837	0.99981						4650.56	0.99919	0.99371
4647.84	1.00342	0.99838	0.99979						4648.63	0.99923	0.99373
4645.91	1.00345	0.9984	0.99975						4646.7	0.99931	0.99376
4643.98	1.00348	0.99842	0.9997						4644.77	0.99939	0.9938
4642.05	1.00351	0.99844	0.99966						4642.84	0.99946	0.99387
4640.13	1.00354	0.99847	0.99964						4640.91	0.99952	0.99395
4638.2	1.00356	0.99849	0.99964						4638.98	0.99956	0.99403
4636.27	1.00357	0.9985	0.99966						4637.05	0.9996	0.99411
4634.34	1.00357	0.9985	0.99969						4635.13	0.99964	0.99418
4632.41	1.00356	0.9985	0.99971						4633.2	0.99968	0.99423
4630.48	1.00354	0.99849	0.99972						4631.27	0.99968	0.99428
4628.55	1.00352	0.99848	0.99973						4629.34	0.99963	0.9943
4626.63	1.00349	0.99846	0.99973						4627.41	0.99958	0.99432
4624.7	1.00345	0.99845	0.99972						4625.48	0.99952	0.99432
4622.77	1.00342	0.99843	0.99971						4623.55	0.99949	0.99432
4620.84	1.0034	0.99842	0.99971						4621.62	0.99947	0.99432
4618.91	1.00337	0.99841	0.9997						4619.69	0.99946	0.9943
4616.98	1.00334	0.9984	0.99968						4617.77	0.99944	0.99423
4615.05	1.00332	0.99839	0.99967						4615.84	0.99941	0.99417
4613.13	1.0033	0.99839	0.99966						4613.91	0.99939	0.99415
4611.2	1.00328	0.99839	0.99966						4611.98	0.99938	0.99414
4609.27	1.00326	0.99839	0.99967						4610.05	0.99938	0.99414
4607.34	1.00325	0.99839	0.99969						4608.12	0.99936	0.99416
4605.41	1.00325	0.9984	0.99971						4606.19	0.99934	0.99418
4603.48	1.00325	0.99841	0.9997						4604.26	0.99931	0.9942
4601.55	1.00327	0.99843	0.99968						4602.33	0.99932	0.99422
4599.63	1.00328	0.99845	0.99963						4600.41	0.99936	0.99426
4597.7	1.0033	0.99848	0.99959						4598.48	0.9994	0.99429
4595.77	1.00332	0.9985	0.99957						4596.55	0.99945	0.99432
4593.84	1.00333	0.99852	0.99955						4594.62	0.9995	0.99435
4591.91	1.00334	0.99853	0.99953						4592.69	0.99955	0.99435
4589.98	1.00335	0.99854	0.99952						4590.76	0.99959	0.99434
4588.05	1.00335	0.99854	0.99954						4588.83	0.99961	0.99432
4586.13	1.00335	0.99854	0.99957						4586.9	0.99962	0.99428
4584.2	1.00336	0.99854	0.99958						4584.97	0.99962	0.99425
4582.27	1.00336	0.99854	0.99958						4583.05	0.99964	0.99423
4580.34	1.00336	0.99854	0.99955						4581.12	0.99969	0.99423
4578.41	1.00337	0.99853	0.99952						4579.19	0.99973	0.99422
4576.48	1.00338	0.99852	0.99951						4577.26	0.99976	0.99421
4574.55	1.00339	0.9985	0.99951						4575.33	0.99977	0.99419
4572.63	1.0034	0.99849	0.99951						4573.4	0.99975	0.99417
4570.7	1.00341	0.99847	0.9995						4571.47	0.99969	0.99416
4568.77	1.00342	0.99846	0.99951						4569.54	0.99962	0.99417
4566.84	1.00343	0.99845	0.99953						4567.61	0.99956	0.99418
4564.91	1.00345	0.99844	0.99955						4565.69	0.99949	0.99416
4562.98	1.00346	0.99844	0.99957						4563.76	0.99941	0.99416
4561.05	1.00348	0.99843	0.99959						4561.83	0.99933	0.9942
4559.13	1.0035	0.99844	0.99962						4559.9	0.99926	0.99425
4557.2	1.00352	0.99844	0.99963						4557.97	0.99921	0.99431
4555.27	1.00353	0.99845	0.99964						4556.04	0.9992	0.99439
4553.34	1.00354	0.99846	0.99967						4554.11	0.99923	0.99447
4551.41	1.00354	0.99847	0.99973						4552.18	0.99928	0.99452
4549.48	1.00353	0.99848	0.99978						4550.25	0.99934	0.99456
4547.55	1.00353	0.9985	0.99979						4548.33	0.99939	0.99458
4545.63	1.00351	0.99852	0.99978						4546.4	0.99943	0.99457
4543.7	1.0035	0.99855	0.99977						4544.47	0.99947	0.99455
4541.77	1.00348	0.99858	0.99976						4542.54	0.99953	0.99452
4539.84	1.00346	0.99861	0.99973						4540.61	0.99961	0.99451
4537.91	1.00344	0.99864	0.99967						4538.68	0.99969	0.99454
4535.98	1.00342	0.99866	0.99961						4536.75	0.99977	0.99458
4534.05	1.0034	0.99868	0.99958						4534.82	0.99983	0.99458
4532.13	1.00338	0.9987	0.99957						4532.89	0.99984	0.99455
4530.2	1.00336	0.99872	0.99956						4530.97	0.99981	0.99452
4528.27	1.00334	0.99873	0.99956						4529.04	0.99977	0.9945
4526.34	1.00332	0.99874	0.99957						4527.11	0.99973	0.99448
4524.41	1.0033	0.99875	0.99959						4525.18	0.99969	0.99446
4522.48	1.00329	0.99876	0.99961						4523.25	0.99966	0.99443
4520.56	1.00327	0.99875	0.99963						4521.32	0.99962	0.99439
4518.63	1.00327	0.99875	0.99966						4519.39	0.99958	0.99436
4516.7	1.00326	0.99873	0.99971						4517.46	0.99956	0.99436
4514.77	1.00326	0.99872	0.99976						4515.53	0.99956	0.99438
4512.84	1.00326	0.99869	0.99979						4513.61	0.99955	0.9944
4510.91	1.00325	0.99866	0.99982						4511.68	0.99954	0.99442
4508.98	1.00324	0.99864	0.99985						4509.75	0.99953	0.99442
4507.06	1.00324	0.99861	0.99989						4507.82	0.99953	0.99441
4505.13	1.00324	0.99858	0.99991						4505.89	0.99953	0.99441
4503.2	1.00324	0.99856	0.99989						4503.96	0.99953	0.9944
4501.27	1.00324	0.99854	0.99985						4502.03	0.99954	0.99438
4499.34	1.00325	0.99853	0.9998						4500.1	0.99954	0.99434
4497.41	1.00327	0.99853	0.99975						4498.17	0.99957	0.99431
4495.48	1.0033	0.99853	0.99972						4496.25	0.9996	0.99432
4493.56	1.00334	0.99854	0.99971						4494.32	0.99963	0.99435
4491.63	1.00338	0.99855	0.9997						4492.39	0.99964	0.9944
4489.7	1.00342	0.99857	0.9997						4490.46	0.99964	0.99441
4487.77	1.00346	0.99859	0.99969						4488.53	0.99963	0.99439
4485.84	1.0035	0.99861	0.99969						4486.6	0.99961	0.99435
4483.91	1.00352	0.99864	0.99972						4484.67	0.99958	0.99433
4481.98	1.00354	0.99866	0.99977						4482.74	0.99957	0.99432
4480.06	1.00355	0.99868	0.99981						4480.81	0.99958	0.99432
4478.13	1.00356	0.9987	0.99983						4478.89	0.99959	0.99431
4476.2	1.00356	0.99871	0.99982						4476.96	0.99958	0.9943
4474.27	1.00355	0.99872	0.9998						4475.03	0.99957	0.99428
4472.34	1.00354	0.99872	0.99977						4473.1	0.99957	0.99428
4470.41	1.00352	0.99872	0.99971						4471.17	0.99958	0.99431
4468.48	1.00349	0.9987	0.99964						4469.24	0.99958	0.99434
4466.56	1.00345	0.99868	0.99958						4467.31	0.99956	0.99436
4464.63	1.0034	0.99866	0.99952						4465.38	0.99952	0.99437
4462.7	1.00336	0.99863	0.99946						4463.45	0.99949	0.99438
4460.77	1.00331	0.99861	0.9994						4461.53	0.99947	0.9944
4458.84	1.00327	0.99858	0.99938						4459.6	0.99946	0.99441
4456.91	1.00323	0.99857	0.99937						4457.67	0.99947	0.9944
4454.98	1.00321	0.99857	0.99937						4455.74	0.99947	0.99438
4453.06	1.00321	0.99858	0.99938						4453.81	0.99947	0.99438
4451.13	1.00321	0.99859	0.99941						4451.88	0.99947	0.99439
4449.2	1.00322	0.99862	0.99946						4449.95	0.99947	0.99438
4447.27	1.00324	0.99864	0.99951						4448.02	0.99946	0.99434
4445.34	1.00326	0.99867	0.99955						4446.09	0.99946	0.9943
4443.41	1.00328	0.9987	0.99957						4444.17	0.99943	0.99428
4441.48	1.00329	0.99873	0.99961						4442.24	0.99939	0.99429
4439.56	1.00331	0.99876	0.99968						4440.31	0.99935	0.99431
4437.63	1.00331	0.99879	0.99977						4438.38	0.99932	0.99433
4435.7	1.00332	0.99882	0.99982						4436.45	0.9993	0.99435
4433.77	1.00332	0.99885	0.99985						4434.52	0.99931	0.99438
4431.84	1.00332	0.99887	0.99986						4432.59	0.99933	0.99441
4429.91	1.00332	0.99889	0.99987						4430.66	0.99933	0.99443
4427.98	1.00332	0.99889	0.99987						4428.73	0.99932	0.99445
4426.06	1.00332	0.99889	0.99986						4426.81	0.99932	0.9945
4424.13	1.00331	0.99887	0.99985						4424.88	0.99934	0.99457
4422.2	1.00331	0.99886	0.99984						4422.95	0.99934	0.99462
4420.27	1.0033	0.99884	0.99984						4421.02	0.99933	0.99465
4418.34	1.00329	0.99883	0.99982						4419.09	0.99934	0.99468
4416.41	1.00328	0.9988	0.99979						4417.16	0.99937	0.99469
4414.48	1.00328	0.99878	0.99978						4415.23	0.9994	0.99466
4412.56	1.00327	0.99877	0.99979						4413.3	0.99943	0.9946
4410.63	1.00328	0.99876	0.9998						4411.37	0.99946	0.99452
4408.7	1.00329	0.99875	0.9998						4409.45	0.9995	0.99446
4406.77	1.0033	0.99875	0.99979						4407.52	0.99955	0.99442
4404.84	1.00331	0.99875	0.99976						4405.59	0.9996	0.99438
4402.91	1.00332	0.99874	0.99972						4403.66	0.99963	0.99433
4400.98	1.00332	0.99874	0.99966						4401.73	0.99963	0.9943
4399.06	1.00331	0.99874	0.99959						4399.8	0.9996	0.99429
4397.13	1.0033	0.99874	0.99955						4397.87	0.99956	0.99428
4395.2	1.00328	0.99874	0.99952						4395.94	0.99955	0.99427
4393.27	1.00325	0.99875	0.99948						4394.01	0.99954	0.99424
4391.34	1.00323	0.99875	0.99942						4392.09	0.99953	0.9942
4389.41	1.0032	0.99875	0.99937						4390.16	0.99955	0.99419
4387.48	1.00317	0.99876	0.99934						4388.23	0.99957	0.99419
4385.56	1.00315	0.99876	0.99932						4386.3	0.99958	0.9942
4383.63	1.00312	0.99876	0.99931						4384.37	0.99957	0.99422
4381.7	1.0031	0.99875	0.99932						4382.44	0.99955	0.99423
4379.77	1.00308	0.99875	0.99935						4380.51	0.99954	0.99427
4377.84	1.00307	0.99875	0.99939						4378.58	0.99952	0.99432
4375.91	1.00306	0.99874	0.99943						4376.65	0.99949	0.99436
4373.98	1.00306	0.99874	0.99946						4374.73	0.99947	0.99438
4372.06	1.00306	0.99873	0.99946						4372.8	0.99947	0.99438
4370.13	1.00307	0.99872	0.99948						4370.87	0.99947	0.99436
4368.2	1.0031	0.99871	0.99951						4368.94	0.99946	0.99434
4366.27	1.00313	0.9987	0.99955						4367.01	0.99947	0.99435
4364.34	1.00318	0.99869	0.99958						4365.08	0.99949	0.99437
4362.41	1.00323	0.9987	0.99961						4363.15	0.99952	0.99441
4360.48	1.0033	0.9987	0.99965						4361.22	0.99955	0.99444
4358.56	1.00336	0.99872	0.99968						4359.29	0.99956	0.99445
4356.63	1.00342	0.99874	0.99971						4357.37	0.99956	0.99445
4354.7	1.00348	0.99876	0.99974						4355.44	0.99953	0.99443
4352.77	1.00354	0.9988	0.99975						4353.51	0.9995	0.99441
4350.84	1.00359	0.99883	0.99975						4351.58	0.99949	0.99441
4348.91	1.00364	0.99887	0.99976						4349.65	0.99948	0.9944
4346.98	1.00369	0.9989	0.99977						4347.72	0.9995	0.99438
4345.06	1.00373	0.99894	0.99978						4345.79	0.99953	0.99436
4343.13	1.00376	0.99898	0.99979						4343.86	0.99956	0.99435
4341.2	1.00379	0.99902	0.9998						4341.93	0.99956	0.99434
4339.27	1.0038	0.99905	0.99981						4340.01	0.99956	0.99431
4337.34	1.0038	0.99908	0.99982						4338.08	0.99954	0.99428
4335.41	1.00379	0.99909	0.99985						4336.15	0.9995	0.99425
4333.48	1.00377	0.9991	0.99988						4334.22	0.99945	0.99424
4331.56	1.00374	0.9991	0.99988						4332.29	0.99939	0.99424
4329.63	1.00371	0.99909	0.99985						4330.36	0.99935	0.99423
4327.7	1.00367	0.99907	0.9998						4328.43	0.99933	0.9942
4325.77	1.00362	0.99903	0.99975						4326.5	0.99931	0.99416
4323.84	1.00357	0.99899	0.99971						4324.57	0.9993	0.99414
4321.91	1.00353	0.99895	0.99967						4322.65	0.99931	0.99414
4319.98	1.00348	0.9989	0.99961						4320.72	0.99934	0.99413
4318.06	1.00344	0.99886	0.99956						4318.79	0.99937	0.99409
4316.13	1.00339	0.99882	0.99954						4316.86	0.9994	0.99404
4314.2	1.00335	0.99878	0.99952						4314.93	0.99944	0.99398
4312.27	1.00331	0.99875	0.99948						4313	0.99948	0.99394
4310.34	1.00327	0.99873	0.99945						4311.07	0.99952	0.99393
4308.41	1.00323	0.9987	0.99942						4309.14	0.99956	0.99394
4306.48	1.0032	0.99868	0.99937						4307.21	0.99959	0.99396
4304.56	1.00318	0.99867	0.99934						4305.29	0.99962	0.99397
4302.63	1.00317	0.99865	0.99934						4303.36	0.99964	0.99397
4300.7	1.00315	0.99865	0.99936						4301.43	0.99964	0.99397
4298.77	1.00315	0.99865	0.99936						4299.5	0.99963	0.99399
4296.84	1.00315	0.99865	0.99935						4297.57	0.99958	0.994
4294.91	1.00315	0.99865	0.99935						4295.64	0.99953	0.994
4292.98	1.00315	0.99865	0.99937						4293.71	0.99949	0.994
4291.06	1.00315	0.99865	0.9994						4291.78	0.99946	0.99401
4289.13	1.00316	0.99865	0.99942						4289.85	0.99942	0.99402
4287.2	1.00316	0.99865	0.99942						4287.93	0.9994	0.99401
4285.27	1.00317	0.99863	0.99941						4286	0.99937	0.994
4283.34	1.00317	0.99862	0.99941						4284.07	0.99935	0.99399
4281.41	1.00317	0.99859	0.99942						4282.14	0.99934	0.99396
4279.48	1.00317	0.99857	0.99944						4280.21	0.99933	0.99393
4277.56	1.00316	0.99855	0.99943						4278.28	0.99935	0.99391
4275.63	1.00315	0.99853	0.99941						4276.35	0.99937	0.99388
4273.7	1.00314	0.99851	0.99938						4274.42	0.99938	0.99384
4271.77	1.00313	0.9985	0.99935						4272.49	0.99939	0.99382
4269.84	1.0031	0.99849	0.99933						4270.57	0.99942	0.99379
4267.91	1.00308	0.99848	0.99931						4268.64	0.99948	0.99378
4265.98	1.00306	0.99848	0.99931						4266.71	0.99955	0.99378
4264.06	1.00305	0.99849	0.99931						4264.78	0.99961	0.99379
4262.13	1.00303	0.9985	0.9993						4262.85	0.99965	0.99378
4260.2	1.00302	0.99851	0.99929						4260.92	0.99967	0.99376
4258.27	1.00301	0.99853	0.99928						4258.99	0.99968	0.99374
4256.34	1.003	0.99856	0.99929						4257.06	0.9997	0.99375
4254.41	1.00299	0.99859	0.99928						4255.13	0.99972	0.99375
4252.48	1.00299	0.99862	0.99927						4253.21	0.99974	0.99374
4250.56	1.003	0.99865	0.99926						4251.28	0.99976	0.99373
4248.63	1.003	0.99868	0.99927						4249.35	0.99981	0.99372
4246.7	1.00301	0.99871	0.99929						4247.42	0.99987	0.99372
4244.77	1.00302	0.99873	0.9993						4245.49	0.99991	0.99371
4242.84	1.00302	0.99874	0.99929						4243.56	0.99993	0.9937
4240.91	1.00303	0.99874	0.99927						4241.63	0.99991	0.99368
4238.98	1.00303	0.99873	0.99926						4239.7	0.99988	0.99368
4237.06	1.00304	0.99872	0.99927						4237.77	0.99984	0.99368
4235.13	1.00304	0.99869	0.99928						4235.85	0.99981	0.99366
4233.2	1.00303	0.99867	0.99927						4233.92	0.99976	0.99364
4231.27	1.00303	0.99863	0.99924						4231.99	0.9997	0.99361
4229.34	1.00301	0.9986	0.99919						4230.06	0.99964	0.9936
4227.41	1.003	0.99856	0.99914						4228.13	0.99958	0.99359
4225.48	1.00298	0.99853	0.99908						4226.2	0.99954	0.99357
4223.56	1.00296	0.9985	0.99904						4224.27	0.9995	0.99353
4221.63	1.00294	0.99847	0.999						4222.34	0.99947	0.99348
4219.7	1.00292	0.99845	0.99897						4220.41	0.99943	0.99345
4217.77	1.0029	0.99844	0.99894						4218.49	0.99939	0.99344
4215.84	1.00288	0.99842	0.99891						4216.56	0.99935	0.99341
4213.91	1.00286	0.99841	0.99889						4214.63	0.99931	0.99338
4211.98	1.00285	0.9984	0.99887						4212.7	0.99929	0.99335
4210.06	1.00283	0.9984	0.99886						4210.77	0.99929	0.99332
4208.13	1.00283	0.9984	0.99886						4208.84	0.9993	0.99327
4206.2	1.00283	0.9984	0.99886						4206.91	0.99933	0.99323
4204.27	1.00283	0.99841	0.99887						4204.98	0.99936	0.99323
4202.34	1.00284	0.99842	0.99888						4203.05	0.99941	0.99324
4200.41	1.00284	0.99843	0.99889						4201.13	0.99945	0.99324
4198.48	1.00285	0.99844	0.9989						4199.2	0.99948	0.99322
4196.56	1.00287	0.99844	0.99891						4197.27	0.9995	0.9932
4194.63	1.00289	0.99845	0.99893						4195.34	0.99953	0.99321
4192.7	1.00291	0.99846	0.99897						4193.41	0.99958	0.99324
4190.77	1.00293	0.99847	0.99901						4191.48	0.99963	0.99324
4188.84	1.00295	0.99848	0.99906						4189.55	0.99965	0.99323
4186.91	1.00297	0.9985	0.9991						4187.62	0.99963	0.9932
4184.98	1.00298	0.99852	0.99911						4185.69	0.99961	0.99318
4183.06	1.00299	0.99854	0.9991						4183.77	0.99961	0.99314
4181.13	1.00299	0.99857	0.99908						4181.84	0.99962	0.99309
4179.2	1.00299	0.99859	0.99905						4179.91	0.99962	0.99302
4177.27	1.00299	0.99862	0.99902						4177.98	0.99961	0.99296
4175.34	1.00299	0.99864	0.999						4176.05	0.9996	0.99293
4173.41	1.00299	0.99866	0.999						4174.12	0.9996	0.99289
4171.48	1.00298	0.99867	0.99901						4172.19	0.99959	0.99285
4169.56	1.00298	0.99868	0.99903						4170.26	0.99959	0.9928
4167.63	1.00298	0.99869	0.99905						4168.33	0.99959	0.99276
4165.7	1.00298	0.9987	0.99905						4166.41	0.99959	0.99272
4163.77	1.00298	0.99871	0.99905						4164.48	0.9996	0.9927
4161.84	1.00299	0.99872	0.99905						4162.55	0.99961	0.9927
4159.91	1.003	0.99872	0.99905						4160.62	0.9996	0.99273
4157.98	1.00301	0.99872	0.99905						4158.69	0.99958	0.99275
4156.06	1.00302	0.99872	0.99905						4156.76	0.99955	0.99276
4154.13	1.00303	0.99872	0.99906						4154.83	0.99954	0.99274
4152.2	1.00305	0.99871	0.99908						4152.9	0.99954	0.99271
4150.27	1.00306	0.99869	0.99911						4150.97	0.99956	0.99271
4148.34	1.00307	0.99868	0.99913						4149.05	0.99958	0.99273
4146.41	1.00308	0.99867	0.99915						4147.12	0.99957	0.99274
4144.48	1.00308	0.99865	0.99916						4145.19	0.99954	0.99273
4142.56	1.00308	0.99864	0.99916						4143.26	0.99949	0.99272
4140.63	1.00308	0.99863	0.99913						4141.33	0.99945	0.99273
4138.7	1.00307	0.99862	0.99908						4139.4	0.99942	0.99272
4136.77	1.00306	0.99861	0.99903						4137.47	0.99942	0.99269
4134.84	1.00306	0.9986	0.99898						4135.54	0.99943	0.99266
4132.91	1.00305	0.99858	0.99893						4133.61	0.99946	0.99264
4130.99	1.00305	0.99857	0.9989						4131.69	0.99949	0.99262
4129.06	1.00304	0.99856	0.99888						4129.76	0.99951	0.9926
4127.13	1.00304	0.99855	0.99888						4127.83	0.99953	0.99257
4125.2	1.00303	0.99854	0.9989						4125.9	0.99954	0.99256
4123.27	1.00304	0.99854	0.9989						4123.97	0.99955	0.99254
4121.34	1.00304	0.99855	0.99889						4122.04	0.99956	0.99253
4119.41	1.00305	0.99856	0.99886						4120.11	0.99956	0.99251
4117.49	1.00306	0.99858	0.99884						4118.18	0.99955	0.99248
4115.56	1.00306	0.99859	0.99883						4116.25	0.99954	0.99247
4113.63	1.00307	0.99861	0.99883						4114.33	0.99953	0.99245
4111.7	1.00308	0.99862	0.99882						4112.4	0.99952	0.99242
4109.77	1.00308	0.99864	0.99883						4110.47	0.99953	0.99239
4107.84	1.00308	0.99865	0.99885						4108.54	0.99955	0.99236
4105.91	1.00309	0.99865	0.99887						4106.61	0.99956	0.99232
4103.99	1.00309	0.99865	0.99888						4104.68	0.99956	0.99229
4102.06	1.00309	0.99865	0.99888						4102.75	0.99955	0.99228
4100.13	1.00309	0.99865	0.99887						4100.82	0.99954	0.99225
4098.2	1.00309	0.99865	0.99886						4098.89	0.99955	0.9922
4096.27	1.00309	0.99864	0.99885						4096.97	0.99957	0.99214
4094.34	1.00309	0.99863	0.99882						4095.04	0.99958	0.99209
4092.41	1.00309	0.99861	0.9988						4093.11	0.99958	0.99203
4090.49	1.00309	0.99858	0.99879						4091.18	0.99958	0.99197
4088.56	1.00309	0.99855	0.99878						4089.25	0.9996	0.99191
4086.63	1.00308	0.99852	0.99877						4087.32	0.99961	0.99186
4084.7	1.00308	0.99849	0.99874						4085.39	0.99958	0.99181
4082.77	1.00308	0.99847	0.99872						4083.46	0.99955	0.99174
4080.84	1.00307	0.99844	0.99869						4081.53	0.99954	0.99166
4078.91	1.00307	0.99843	0.99864						4079.61	0.99954	0.99158
4076.99	1.00307	0.99841	0.99859						4077.68	0.99954	0.99148
4075.06	1.00307	0.99841	0.99854						4075.75	0.99954	0.99137
4073.13	1.00306	0.9984	0.9985						4073.82	0.99955	0.99128
4071.2	1.00306	0.9984	0.99847						4071.89	0.99955	0.99122
4069.27	1.00305	0.9984	0.99846						4069.96	0.99953	0.99119
4067.34	1.00303	0.9984	0.99846						4068.03	0.99953	0.99118
4065.41	1.00302	0.99841	0.99847						4066.1	0.99955	0.99118
4063.49	1.003	0.99841	0.99848						4064.17	0.99958	0.99118
4061.56	1.00298	0.99842	0.99849						4062.25	0.99962	0.99119
4059.63	1.00296	0.99843	0.9985						4060.32	0.99964	0.99121
4057.7	1.00293	0.99843	0.99851						4058.39	0.99966	0.99124
4055.77	1.00291	0.99843	0.99851						4056.46	0.99966	0.99125
4053.84	1.00288	0.99843	0.9985						4054.53	0.99965	0.99125
4051.91	1.00286	0.99843	0.99847						4052.6	0.99964	0.99124
4049.99	1.00284	0.99842	0.99842						4050.67	0.99963	0.99125
4048.06	1.00282	0.9984	0.99838						4048.74	0.99961	0.99126
4046.13	1.0028	0.99838	0.99835						4046.81	0.99959	0.99127
4044.2	1.00277	0.99835	0.99831						4044.89	0.99957	0.99127
4042.27	1.00275	0.99833	0.99828						4042.96	0.99956	0.99125
4040.34	1.00273	0.99831	0.99825						4041.03	0.99955	0.9912
4038.41	1.00272	0.99828	0.99821						4039.1	0.99955	0.99113
4036.49	1.00272	0.99826	0.99817						4037.17	0.99956	0.99104
4034.56	1.00272	0.99824	0.99812						4035.24	0.99956	0.99094
4032.63	1.00272	0.99822	0.99808						4033.31	0.99953	0.99083
4030.7	1.00272	0.9982	0.99806						4031.38	0.99951	0.99072
4028.77	1.00272	0.99819	0.99805						4029.45	0.99953	0.99064
4026.84	1.00272	0.99818	0.99803						4027.53	0.99956	0.99059
4024.91	1.00272	0.99817	0.998						4025.6	0.99958	0.99054
4022.99	1.00271	0.99816	0.998						4023.67	0.99961	0.99051
4021.06	1.00271	0.99816	0.99801						4021.74	0.99965	0.99046
4019.13	1.0027	0.99816	0.99802						4019.81	0.99967	0.99043
4017.2	1.00269	0.99815	0.998						4017.88	0.99969	0.99039
4015.27	1.00267	0.99815	0.99799						4015.95	0.99969	0.99037
4013.34	1.00265	0.99815	0.99798						4014.02	0.9997	0.99035
4011.41	1.00264	0.99814	0.99798						4012.09	0.99971	0.99034
4009.49	1.00262	0.99812	0.99796						4010.17	0.99974	0.99033
4007.56	1.00261	0.99811	0.99794						4008.24	0.99977	0.99031
4005.63	1.00259	0.99809	0.99792						4006.31	0.9998	0.99029
4003.7	1.00258	0.99808	0.9979						4004.38	0.99984	0.99025
4001.77	1.00257	0.99807	0.9979						4002.45	0.99987	0.99021
3999.84	1.00256	0.99806	0.99789						4000.52	0.99988	0.99017
3997.91	1.00256	0.99805	0.99788						3998.59	0.99989	0.99013
3995.99	1.00256	0.99804	0.9979						3996.66	0.99992	0.99008
3994.06	1.00257	0.99804	0.99794						3994.73	0.99996	0.99005
3992.13	1.00258	0.99803	0.99798						3992.8	1.00001	0.99002
3990.2	1.00259	0.99803	0.99802						3990.88	1.00006	0.99
3988.27	1.0026	0.99802	0.99806						3988.95	1.00009	0.98999
3986.34	1.00261	0.99802	0.99808						3987.02	1.00013	0.98998
3984.41	1.00262	0.99802	0.99809						3985.09	1.00019	0.98997
3982.49	1.00264	0.99801	0.99811						3983.16	1.00025	0.98998
3980.56	1.00266	0.998	0.99812						3981.23	1.00029	0.98998
3978.63	1.00269	0.99799	0.99813						3979.3	1.00031	0.98997
3976.7	1.00271	0.99798	0.99815						3977.37	1.0003	0.98993
3974.77	1.00275	0.99796	0.99814						3975.44	1.00024	0.98988
3972.84	1.00278	0.99795	0.99814						3973.52	1.00014	0.98983
3970.91	1.00281	0.99793	0.99817						3971.59	1.0001	0.98979
3968.99	1.00284	0.9979	0.99824						3969.66	1.00012	0.98975
3967.06	1.00287	0.99788	0.99831						3967.73	1.00016	0.98971
3965.13	1.0029	0.99786	0.9984						3965.8	1.0002	0.98968
3963.2	1.00293	0.99783	0.99852						3963.87	1.00028	0.98965
3961.27	1.00296	0.99782	0.99864						3961.94	1.00037	0.98962
3959.34	1.00299	0.99781	0.99873						3960.01	1.00046	0.9896
3957.41	1.00301	0.9978	0.99875						3958.08	1.0005	0.9896
3955.49	1.00303	0.99779	0.99873						3956.16	1.00048	0.98962
3953.56	1.00305	0.99777	0.99872						3954.23	1.00048	0.98964
3951.63	1.00307	0.99776	0.99877						3952.3	1.00057	0.98966
3949.7	1.00309	0.99774	0.99883						3950.37	1.00069	0.98969
3947.77	1.0031	0.99773	0.99889						3948.44	1.00081	0.98973
3945.84	1.00311	0.99772	0.99896						3946.51	1.00094	0.98979
3943.91	1.0031	0.99772	0.99904						3944.58	1.00108	0.98984
3941.99	1.00309	0.99772	0.99909						3942.65	1.00119	0.98987
3940.06	1.00308	0.99772	0.99913						3940.72	1.0013	0.98989
3938.13	1.00308	0.99773	0.99923						3938.8	1.00144	0.98991
3936.2	1.00308	0.99773	0.99938						3936.87	1.00161	0.98993
3934.27	1.00309	0.99773	0.9995						3934.94	1.00172	0.98996
3932.34	1.0031	0.99772	0.99955						3933.01	1.00176	0.98997
3930.41	1.00311	0.99772	0.99951						3931.08	1.00166	0.98997
3928.49	1.00313	0.99771	0.99937						3929.15	1.00144	0.98997
3926.56	1.00315	0.9977	0.99925						3927.22	1.0012	0.98999
3924.63	1.00317	0.9977	0.99924						3925.29	1.00112	0.98998
3922.7	1.0032	0.99769	0.99936						3923.36	1.00119	0.98995
3920.77	1.00324	0.99768	0.9996						3921.44	1.0014	0.98991
3918.84	1.00328	0.99766	0.99987						3919.51	1.00168	0.98988
3916.91	1.00333	0.99764	1.00007						3917.58	1.00191	0.98986
3914.99	1.00338	0.99761	1.00018						3915.65	1.00206	0.98986
3913.06	1.00343	0.99758	1.00029						3913.72	1.00222	0.98986
3911.13	1.00349	0.99753	1.0004						3911.79	1.00236	0.98987
3909.2	1.00356	0.99747	1.00047						3909.86	1.00244	0.98988
3907.27	1.00363	0.99741	1.00056						3907.93	1.00252	0.98988
3905.34	1.00369	0.99734	1.00067						3906	1.00263	0.98987
3903.41	1.00375	0.99728	1.0008						3904.08	1.00277	0.98987
3901.49	1.0038	0.99722	1.00101						3902.15	1.00297	0.98988
3899.56	1.00385	0.99717	1.00122						3900.22	1.00317	0.98989
3897.63	1.00389	0.99713	1.00132						3898.29	1.00327	0.98989
3895.7	1.00394	0.9971	1.00133						3896.36	1.00327	0.98989
3893.77	1.00398	0.99709	1.00136						3894.43	1.00328	0.9899
3891.84	1.00403	0.99707	1.00147						3892.5	1.00337	0.98991
3889.91	1.00408	0.99706	1.00156						3890.57	1.00346	0.98994
3887.99	1.00413	0.99705	1.00156						3888.64	1.00346	0.98998
3886.06	1.00419	0.99703	1.00155						3886.72	1.00344	0.99001
3884.13	1.00425	0.99701	1.0016						3884.79	1.00349	0.99002
3882.2	1.00431	0.997	1.00167						3882.86	1.00357	0.99
3880.27	1.00437	0.99699	1.00177						3880.93	1.00368	0.98995
3878.34	1.00443	0.99699	1.00185						3879	1.00382	0.98985
3876.41	1.00449	0.99697	1.00194						3877.07	1.00403	0.98973
3874.49	1.00455	0.99694	1.00221						3875.14	1.00436	0.98965
3872.56	1.00461	0.9969	1.00258						3873.21	1.00474	0.98961
3870.63	1.00466	0.99685	1.0029						3871.28	1.00506	0.98956
3868.7	1.0047	0.99678	1.00315						3869.36	1.00532	0.9895
3866.77	1.00475	0.9967	1.0033						3867.43	1.00546	0.98944
3864.84	1.00478	0.99661	1.00326						3865.5	1.00539	0.98939
3862.91	1.00479	0.99651	1.00309						3863.57	1.00519	0.98935
3860.99	1.00479	0.9964	1.003						3861.64	1.00509	0.98932
3859.06	1.00478	0.9963	1.00308						3859.71	1.00518	0.9893
3857.13	1.00476	0.99619	1.00326						3857.78	1.00539	0.98926
3855.2	1.00474	0.9961	1.00342						3855.85	1.0056	0.98922
3853.27	1.00471	0.99602	1.00345						3853.92	1.00569	0.98918
3851.34	1.00468	0.99597	1.00337						3852	1.00566	0.98915
3849.41	1.00466	0.99594	1.00325						3850.07	1.00559	0.98917
3847.49	1.00464	0.99591	1.00316						3848.14	1.00555	0.9892
3845.56	1.00462	0.9959	1.00305						3846.21	1.00547	0.98922
3843.63	1.00461	0.99589	1.00289						3844.28	1.00535	0.98922
3841.7	1.00461	0.9959	1.00283						3842.35	1.00533	0.98922
3839.77	1.00461	0.99594	1.00294						3840.42	1.00551	0.98921
3837.84	1.0046	0.996	1.00314						3838.49	1.00576	0.98917
3835.91	1.00459	0.99609	1.00326						3836.56	1.0059	0.98912
3833.99	1.00458	0.99618	1.00324						3834.64	1.00588	0.98906
3832.06	1.00458	0.99627	1.00312						3832.71	1.00576	0.98901
3830.13	1.00459	0.99635	1.00307						3830.78	1.00569	0.98897
3828.2	1.00461	0.99643	1.00314						3828.85	1.00566	0.98896
3826.27	1.00462	0.99649	1.00308						3826.92	1.00552	0.98891
3824.34	1.00463	0.99653	1.00284						3824.99	1.00522	0.98884
3822.41	1.00464	0.99657	1.00259						3823.06	1.0049	0.98876
3820.49	1.00462	0.9966	1.00238						3821.13	1.00466	0.98869
3818.56	1.00459	0.99663	1.00226						3819.2	1.00456	0.98864
3816.63	1.00455	0.99665	1.00227						3817.28	1.00461	0.98859
3814.7	1.00449	0.99667	1.00239						3815.35	1.00478	0.98853
3812.77	1.00443	0.99668	1.00252						3813.42	1.00493	0.98846
3810.84	1.00438	0.9967	1.0025						3811.49	1.00495	0.98834
3808.91	1.00432	0.99671	1.00232						3809.56	1.00483	0.98821
3806.99	1.00426	0.99672	1.00206						3807.63	1.00458	0.9881
3805.06	1.00419	0.99674	1.00172						3805.7	1.00425	0.988
3803.13	1.00411	0.99677	1.00133						3803.77	1.00384	0.98791
3801.2	1.00403	0.99679	1.00094						3801.84	1.00346	0.98782
3799.27	1.00393	0.99684	1.00062						3799.92	1.00318	0.98771
3797.34	1.00382	0.9969	1.00043						3797.99	1.00304	0.9876
3795.41	1.0037	0.99697	1.00032						3796.06	1.003	0.9875
3793.49	1.00358	0.99706	1.0002						3794.13	1.00291	0.98742
3791.56	1.00345	0.99715	1.00006						3792.2	1.00274	0.98734
3789.63	1.00333	0.99723	0.99985						3790.27	1.00251	0.98724
3787.7	1.00323	0.9973	0.99954						3788.34	1.00224	0.98712
3785.77	1.00315	0.99735	0.99918						3786.41	1.00195	0.98701
3783.84	1.0031	0.99738	0.99881						3784.48	1.00164	0.9869
3781.91	1.00306	0.99738	0.99851						3782.56	1.0014	0.98678
3779.99	1.00304	0.99736	0.99836						3780.63	1.00129	0.98664
3778.06	1.00304	0.99733	0.99837						3778.7	1.00137	0.98651
3776.13	1.00306	0.99729	0.99844						3776.77	1.00156	0.9864
3774.2	1.00311	0.99722	0.99849						3774.84	1.00174	0.9863
3772.27	1.00318	0.99712	0.99869						3772.91	1.00203	0.98619
3770.34	1.00329	0.99699	0.99907						3770.98	1.00244	0.98605
3768.41	1.00343	0.99684	0.99952						3769.05	1.00294	0.98591
3766.49	1.0036	0.99666	1.00004						3767.12	1.00351	0.98574
3764.56	1.0038	0.99646	1.00059						3765.2	1.00407	0.98554
3762.63	1.00402	0.99623	1.00111						3763.27	1.00459	0.98533
3760.7	1.00425	0.99596	1.00156						3761.34	1.00504	0.98513
3758.77	1.00449	0.99567	1.00192						3759.41	1.00544	0.98494
3756.84	1.00471	0.99536	1.00234						3757.48	1.00591	0.98477
3754.91	1.00492	0.99504	1.00292						3755.55	1.00649	0.98458
3752.99	1.0051	0.99472	1.00352						3753.62	1.00701	0.98438
3751.06	1.00524	0.99441	1.00393						3751.69	1.00727	0.98416
3749.13	1.00534	0.99411	1.00412						3749.76	1.00726	0.98392
3747.2	1.00539	0.99383	1.00421						3747.84	1.00706	0.98365
3745.27	1.0054	0.99357	1.00428						3745.91	1.00679	0.98335
3743.34	1.00538	0.99334	1.00427						3743.98	1.00647	0.98301
3741.41	1.00532	0.99314	1.00413						3742.05	1.00603	0.98266
3739.49	1.00525	0.99296	1.00382						3740.12	1.0054	0.98232
3737.56	1.00514	0.99281	1.0033						3738.19	1.00457	0.98199
3735.63	1.00502	0.9927	1.0026						3736.26	1.00364	0.98166
3733.7	1.00487	0.99265	1.00187						3734.33	1.00283	0.98133
3731.77	1.00469	0.99265	1.00121						3732.4	1.0022	0.98098
3729.84	1.0045	0.99268	1.00062						3730.48	1.00168	0.9806
3727.92	1.00432	0.99273	1.00012						3728.55	1.00128	0.98016
3725.99	1.00415	0.9928	0.99978						3726.62	1.00107	0.97967
3724.06	1.00399	0.99288	0.9995						3724.69	1.00098	0.97916
3722.13	1.00385	0.99298	0.9992						3722.76	1.00094	0.97862
3720.2	1.00373	0.99306	0.99885						3720.83	1.00086	0.97801
3718.27	1.00363	0.99313	0.99834						3718.9	1.00066	0.97734
3716.34	1.00355	0.99317	0.99768						3716.97	1.00035	0.97663
3714.42	1.00348	0.99317	0.99692						3715.04	0.99999	0.97587
3712.49	1.00342	0.99315	0.99627						3713.12	0.9998	0.97507
3710.56	1.00336	0.9931	0.99599						3711.19	1	0.9742
3708.63	1.00331	0.99304	0.9959						3709.26	1.00034	0.97322
3706.7	1.00327	0.99296	0.9957						3707.33	1.00056	0.97212
3704.77	1.00325	0.99287	0.9953						3705.4	1.0006	0.97091
3702.84	1.00326	0.99276	0.99476						3703.47	1.00047	0.9696
3700.92	1.00332	0.99265	0.99414						3701.54	1.00024	0.96817
3698.99	1.00342	0.99253	0.99354						3699.61	1.00004	0.96667
3697.06	1.00357	0.99241	0.99305						3697.68	1.00001	0.96509
3695.13	1.00377	0.99229	0.99263						3695.76	1.0001	0.96335
3693.2	1.004	0.99219	0.99223						3693.83	1.00028	0.96147
3691.27	1.00427	0.99212	0.99196						3691.9	1.00066	0.95949
3689.34	1.00456	0.99209	0.99182						3689.97	1.00128	0.95734
3687.42	1.00486	0.9921	0.99178						3688.04	1.00211	0.95498
3685.49	1.00519	0.99213	0.99175						3686.11	1.00292	0.95244
3683.56	1.00556	0.99215	0.9915						3684.18	1.0035	0.94972
3681.63	1.00596	0.99217	0.991						3682.25	1.00383	0.94687
3679.7	1.00637	0.99217	0.99032						3680.32	1.00402	0.94391
3677.77	1.00679	0.99215	0.98956						3678.4	1.00415	0.94079
3675.84	1.00721	0.99211	0.98861						3676.47	1.00414	0.93747
3673.92	1.00759	0.99205	0.98737						3674.54	1.00383	0.93402
3671.99	1.00794	0.99196	0.98604						3672.61	1.00339	0.93052
3670.06	1.00825	0.99183	0.98492						3670.68	1.00325	0.92696
3668.13	1.00851	0.99166	0.98397						3668.75	1.00339	0.92326
3666.2	1.00873	0.99142	0.98313						3666.82	1.00375	0.91946
3664.27	1.0089	0.99112	0.9823						3664.89	1.00418	0.91556
3662.34	1.00904	0.99075	0.98126						3662.96	1.00445	0.91157
3660.42	1.00914	0.99029	0.97991						3661.04	1.00449	0.90753
3658.49	1.0092	0.98975	0.97834						3659.11	1.00432	0.90349
3656.56	1.00922	0.98913	0.97664						3657.18	1.004	0.89945
3654.63	1.00918	0.98844	0.9749						3655.25	1.00365	0.89541
3652.7	1.0091	0.98769	0.97323						3653.32	1.00339	0.89143
3650.77	1.00896	0.98687	0.97182						3651.39	1.00338	0.88749
3648.84	1.00877	0.98602	0.97055						3649.46	1.00349	0.8835
3646.92	1.00851	0.98514	0.96929						3647.53	1.00363	0.87955
3644.99	1.00821	0.98424	0.96796						3645.6	1.00366	0.87561
3643.06	1.00788	0.98332	0.96642						3643.68	1.00345	0.87167
3641.13	1.00753	0.98236	0.96476						3641.75	1.00307	0.86779
3639.2	1.00719	0.98137	0.96305						3639.82	1.00264	0.86399
3637.27	1.00684	0.98038	0.96129						3637.89	1.00219	0.86027
3635.34	1.0065	0.97938	0.95956						3635.96	1.00179	0.85661
3633.42	1.00616	0.9784	0.95789						3634.03	1.0015	0.85301
3631.49	1.00583	0.97745	0.95627						3632.1	1.00129	0.84944
3629.56	1.00551	0.97656	0.95472						3630.17	1.00112	0.84594
3627.63	1.0052	0.97573	0.9533						3628.24	1.00102	0.84253
3625.7	1.00491	0.97495	0.95213						3626.32	1.00115	0.83918
3623.77	1.00465	0.97422	0.95116						3624.39	1.00154	0.83581
3621.84	1.00443	0.97353	0.95013						3622.46	1.00185	0.83243
3619.92	1.00424	0.97288	0.94898						3620.53	1.00201	0.82907
3617.99	1.00408	0.97227	0.94776						3618.6	1.00211	0.82578
3616.06	1.00395	0.97168	0.94653						3616.67	1.00217	0.82255
3614.13	1.00383	0.97112	0.94525						3614.74	1.00213	0.81934
3612.2	1.00373	0.9706	0.94392						3612.81	1.00194	0.81616
3610.27	1.00363	0.97009	0.9426						3610.88	1.00167	0.81303
3608.34	1.00353	0.96962	0.9414						3608.96	1.00149	0.80991
3606.42	1.00343	0.96917	0.94033						3607.03	1.00146	0.80681
3604.49	1.00332	0.96873	0.93935						3605.1	1.00151	0.80368
3602.56	1.00321	0.96832	0.93829						3603.17	1.00148	0.80048
3600.63	1.00311	0.96791	0.93705						3601.24	1.00127	0.79725
3598.7	1.00302	0.96749	0.93573						3599.31	1.00096	0.79404
3596.77	1.00294	0.96707	0.93444						3597.38	1.00068	0.79084
3594.84	1.00288	0.96664	0.93322						3595.45	1.00055	0.78764
3592.92	1.00283	0.96622	0.93196						3593.52	1.00045	0.78443
3590.99	1.00279	0.96579	0.93064						3591.6	1.0003	0.78122
3589.06	1.00275	0.96536	0.92942						3589.67	1.00027	0.77802
3587.13	1.00272	0.96495	0.92835						3587.74	1.00047	0.77479
3585.2	1.0027	0.96454	0.92734						3585.81	1.00079	0.77156
3583.27	1.00269	0.96414	0.92634						3583.88	1.00114	0.7683
3581.34	1.00268	0.96374	0.92531						3581.95	1.00141	0.765
3579.42	1.00269	0.96333	0.9242						3580.02	1.00156	0.76166
3577.49	1.00271	0.96291	0.92306						3578.09	1.00165	0.75833
3575.56	1.00274	0.96248	0.92193						3576.16	1.00173	0.755
3573.63	1.00277	0.96203	0.92079						3574.24	1.0018	0.75165
3571.7	1.00279	0.96158	0.91963						3572.31	1.00183	0.74831
3569.77	1.00282	0.96111	0.91842						3570.38	1.00179	0.74497
3567.84	1.00284	0.96063	0.9172						3568.45	1.00171	0.74163
3565.92	1.00283	0.96016	0.91605						3566.52	1.0017	0.73828
3563.99	1.00281	0.95969	0.91502						3564.59	1.00182	0.7349
3562.06	1.00278	0.95921	0.91402						3562.66	1.00201	0.73144
3560.13	1.00274	0.95872	0.91291						3560.73	1.0021	0.72794
3558.2	1.0027	0.95822	0.9117						3558.8	1.00208	0.72443
3556.27	1.00266	0.9577	0.91041						3556.88	1.002	0.72093
3554.34	1.00262	0.95718	0.90905						3554.95	1.00184	0.71743
3552.42	1.00259	0.95665	0.90764						3553.02	1.00162	0.71395
3550.49	1.00255	0.95612	0.9062						3551.09	1.00138	0.71049
3548.56	1.00252	0.95559	0.90476						3549.16	1.00113	0.70704
3546.63	1.00249	0.95506	0.90334						3547.23	1.00089	0.7036
3544.7	1.00246	0.95454	0.90204						3545.3	1.00077	0.70015
3542.77	1.00243	0.95402	0.90093						3543.37	1.00089	0.69669
3540.84	1.0024	0.9535	0.8999						3541.44	1.00117	0.69321
3538.92	1.00238	0.95298	0.89883						3539.52	1.0014	0.68971
3536.99	1.00237	0.95245	0.8977						3537.59	1.00151	0.68622
3535.06	1.00237	0.95192	0.8965						3535.66	1.00151	0.68271
3533.13	1.00237	0.95139	0.89525						3533.73	1.00143	0.67919
3531.2	1.00238	0.95086	0.894						3531.8	1.00133	0.6757
3529.27	1.0024	0.95033	0.89277						3529.87	1.00122	0.67221
3527.34	1.00241	0.9498	0.89153						3527.94	1.00109	0.66873
3525.42	1.00242	0.94927	0.89032						3526.01	1.00095	0.66526
3523.49	1.00242	0.94875	0.88918						3524.08	1.00085	0.6618
3521.56	1.00241	0.94824	0.88808						3522.16	1.00083	0.65833
3519.63	1.00238	0.94773	0.88699						3520.23	1.00085	0.65484
3517.7	1.00236	0.94721	0.88586						3518.3	1.00082	0.65133
3515.77	1.00233	0.94668	0.88468						3516.37	1.00072	0.6478
3513.84	1.0023	0.94615	0.88346						3514.44	1.00059	0.64431
3511.92	1.00227	0.94561	0.88222						3512.51	1.00048	0.64085
3509.99	1.00224	0.94506	0.88096						3510.58	1.00036	0.63741
3508.06	1.00221	0.94452	0.87967						3508.65	1.00021	0.634
3506.13	1.00217	0.94399	0.87841						3506.72	1.00006	0.6306
3504.2	1.00214	0.94346	0.8772						3504.8	0.99999	0.62724
3502.27	1.00211	0.94294	0.87606						3502.87	1	0.62387
3500.34	1.00207	0.94243	0.87493						3500.94	1.00008	0.6205
3498.42	1.00204	0.94193	0.87379						3499.01	1.00017	0.61712
3496.49	1.00202	0.94143	0.87266						3497.08	1.00023	0.61375
3494.56	1.002	0.94092	0.87152						3495.15	1.00024	0.6104
3492.63	1.00199	0.94042	0.87036						3493.22	1.00019	0.60707
3490.7	1.00198	0.93991	0.86916						3491.29	1.00009	0.60375
3488.77	1.00198	0.93942	0.86796						3489.36	0.99997	0.60041
3486.84	1.00197	0.93892	0.86677						3487.44	0.99987	0.59705
3484.92	1.00197	0.93843	0.86562						3485.51	0.99979	0.59372
3482.99	1.00197	0.93793	0.86449						3483.58	0.99973	0.59039
3481.06	1.00196	0.93744	0.86337						3481.65	0.99968	0.58708
3479.13	1.00196	0.93695	0.86228						3479.72	0.99967	0.58376
3477.2	1.00195	0.93645	0.8612						3477.79	0.99967	0.58045
3475.27	1.00195	0.93594	0.86007						3475.86	0.99965	0.57715
3473.34	1.00194	0.93544	0.85893						3473.93	0.99963	0.57386
3471.42	1.00193	0.93492	0.85779						3472	0.9996	0.57057
3469.49	1.00192	0.9344	0.85667						3470.08	0.99956	0.56732
3467.56	1.00192	0.93388	0.85556						3468.15	0.99956	0.5641
3465.63	1.00191	0.93336	0.85447						3466.22	0.9996	0.56089
3463.7	1.0019	0.93284	0.8534						3464.29	0.99965	0.55768
3461.77	1.0019	0.93233	0.85234						3462.36	0.99969	0.55449
3459.84	1.00189	0.93182	0.85129						3460.43	0.99971	0.5513
3457.92	1.00189	0.93131	0.85026						3458.5	0.99975	0.54812
3455.99	1.00188	0.9308	0.84921						3456.57	0.9998	0.54492
3454.06	1.00188	0.93029	0.84815						3454.64	0.99983	0.54172
3452.13	1.00189	0.92978	0.84707						3452.72	0.99982	0.53851
3450.2	1.00189	0.92927	0.84599						3450.79	0.9998	0.53529
3448.27	1.00189	0.92876	0.84491						3448.86	0.99976	0.53208
3446.34	1.00189	0.92825	0.84379						3446.93	0.99969	0.5289
3444.42	1.00188	0.92775	0.84269						3445	0.9996	0.52572
3442.49	1.00187	0.92725	0.84161						3443.07	0.99955	0.52255
3440.56	1.00185	0.92675	0.84058						3441.14	0.99955	0.51939
3438.63	1.00183	0.92625	0.83956						3439.21	0.99958	0.51627
3436.7	1.00181	0.92576	0.83854						3437.28	0.99962	0.51319
3434.77	1.0018	0.92527	0.83752						3435.36	0.99963	0.51013
3432.84	1.00178	0.92479	0.83649						3433.43	0.9996	0.50708
3430.92	1.00176	0.92432	0.83545						3431.5	0.99955	0.50405
3428.99	1.00175	0.92385	0.83441						3429.57	0.9995	0.50105
3427.06	1.00174	0.92339	0.83336						3427.64	0.99945	0.49812
3425.13	1.00174	0.92294	0.83235						3425.71	0.99941	0.49527
3423.2	1.00174	0.92249	0.83138						3423.78	0.9994	0.49246
3421.27	1.00174	0.92206	0.83044						3421.85	0.99941	0.48965
3419.34	1.00175	0.92163	0.82951						3419.92	0.99943	0.48687
3417.42	1.00176	0.92121	0.82859						3418	0.99941	0.48414
3415.49	1.00177	0.92079	0.82767						3416.07	0.99938	0.48146
3413.56	1.00178	0.92038	0.82677						3414.14	0.99935	0.47879
3411.63	1.0018	0.91997	0.82589						3412.21	0.99931	0.47612
3409.7	1.00181	0.91957	0.82502						3410.28	0.99928	0.47348
3407.77	1.00182	0.91918	0.82417						3408.35	0.99926	0.4709
3405.84	1.00183	0.91879	0.82334						3406.42	0.99926	0.4684
3403.92	1.00184	0.91841	0.82253						3404.49	0.99928	0.46599
3401.99	1.00183	0.91804	0.82173						3402.56	0.99929	0.46368
3400.06	1.00182	0.91768	0.82097						3400.64	0.9993	0.46147
3398.13	1.00181	0.91732	0.82027						3398.71	0.99935	0.45934
3396.2	1.00178	0.91697	0.81961						3396.78	0.99942	0.45728
3394.27	1.00176	0.91664	0.81898						3394.85	0.99947	0.45528
3392.34	1.00173	0.91631	0.81836						3392.92	0.99949	0.45336
3390.42	1.0017	0.916	0.81775						3390.99	0.99948	0.45148
3388.49	1.00167	0.91569	0.81717						3389.06	0.99946	0.44963
3386.56	1.00164	0.9154	0.81659						3387.13	0.99943	0.44782
3384.63	1.00161	0.91512	0.81603						3385.2	0.99942	0.44609
3382.7	1.00159	0.91485	0.81549						3383.28	0.99942	0.44446
3380.77	1.00157	0.91459	0.81497						3381.35	0.99944	0.44291
3378.84	1.00156	0.91435	0.81449						3379.42	0.99946	0.44142
3376.92	1.00155	0.91411	0.81403						3377.49	0.99948	0.43998
3374.99	1.00154	0.91388	0.81359						3375.56	0.99951	0.4386
3373.06	1.00154	0.91366	0.81316						3373.63	0.99952	0.4373
3371.13	1.00153	0.91345	0.81275						3371.7	0.99951	0.43605
3369.2	1.00153	0.91325	0.81237						3369.77	0.99951	0.43483
3367.27	1.00152	0.91305	0.81203						3367.84	0.99953	0.43364
3365.34	1.00153	0.91288	0.8117						3365.92	0.99953	0.43252
3363.42	1.00153	0.91272	0.8114						3363.99	0.99951	0.43148
3361.49	1.00154	0.91258	0.81111						3362.06	0.99948	0.43052
3359.56	1.00155	0.91244	0.81084						3360.13	0.99946	0.42964
3357.63	1.00156	0.91232	0.81058						3358.2	0.99948	0.4288
3355.7	1.00157	0.91221	0.81034						3356.27	0.99951	0.42802
3353.77	1.00157	0.91211	0.81013						3354.34	0.99953	0.42729
3351.84	1.00157	0.91202	0.80996						3352.41	0.99955	0.42663
3349.92	1.00157	0.91194	0.80982						3350.48	0.99953	0.42601
3347.99	1.00158	0.91188	0.80969						3348.56	0.99948	0.42542
3346.06	1.00158	0.91182	0.80956						3346.63	0.99942	0.42484
3344.13	1.00157	0.91176	0.80945						3344.7	0.99938	0.42428
3342.2	1.00157	0.91171	0.80935						3342.77	0.99937	0.42376
3340.27	1.00156	0.91165	0.80926						3340.84	0.99938	0.4233
3338.35	1.00155	0.9116	0.80919						3338.91	0.99939	0.42292
3336.42	1.00154	0.91154	0.80913						3336.98	0.9994	0.42258
3334.49	1.00153	0.91149	0.80907						3335.05	0.9994	0.42228
3332.56	1.00152	0.91143	0.80902						3333.12	0.99939	0.42202
3330.63	1.0015	0.91136	0.80897						3331.2	0.99938	0.42178
3328.7	1.00149	0.9113	0.80891						3329.27	0.99937	0.42156
3326.77	1.00148	0.91123	0.80886						3327.34	0.99936	0.42133
3324.85	1.00146	0.91117	0.80881						3325.41	0.99933	0.42109
3322.92	1.00145	0.91111	0.80878						3323.48	0.9993	0.42087
3320.99	1.00144	0.91105	0.80875						3321.55	0.99929	0.42068
3319.06	1.00144	0.911	0.80872						3319.62	0.99925	0.4205
3317.13	1.00144	0.91095	0.80871						3317.69	0.9992	0.42033
3315.2	1.00145	0.91091	0.8087						3315.76	0.99914	0.42015
3313.27	1.00145	0.91087	0.8087						3313.84	0.99913	0.41997
3311.35	1.00146	0.91084	0.8087						3311.91	0.99917	0.4198
3309.42	1.00147	0.91082	0.80872						3309.98	0.99922	0.41964
3307.49	1.00148	0.91081	0.80876						3308.05	0.99926	0.41951
3305.56	1.0015	0.9108	0.8088						3306.12	0.9993	0.41939
3303.63	1.00151	0.91081	0.80882						3304.19	0.99933	0.41929
3301.7	1.00152	0.91082	0.80882						3302.26	0.99935	0.41918
3299.77	1.00153	0.91083	0.80883						3300.33	0.99937	0.41907
3297.85	1.00154	0.91084	0.80885						3298.4	0.9994	0.41898
3295.92	1.00154	0.91084	0.80889						3296.48	0.99944	0.41892
3293.99	1.00153	0.91085	0.80893						3294.55	0.99947	0.41884
3292.06	1.00153	0.91086	0.80896						3292.62	0.99948	0.41877
3290.13	1.00152	0.91087	0.80899						3290.69	0.99948	0.4187
3288.2	1.00151	0.91089	0.80901						3288.76	0.99948	0.41862
3286.27	1.00149	0.91089	0.80902						3286.83	0.9995	0.41853
3284.35	1.00148	0.9109	0.80904						3284.9	0.99953	0.41843
3282.42	1.00146	0.91091	0.80906						3282.97	0.99956	0.41835
3280.49	1.00145	0.91091	0.80908						3281.04	0.99957	0.41827
3278.56	1.00143	0.91091	0.80912						3279.12	0.99957	0.41821
3276.63	1.00142	0.91092	0.80917						3277.19	0.99957	0.41815
3274.7	1.00141	0.91093	0.80923						3275.26	0.99956	0.4181
3272.77	1.00141	0.91094	0.8093						3273.33	0.99955	0.41805
3270.85	1.00141	0.91096	0.80938						3271.4	0.99952	0.41801
3268.92	1.00142	0.91098	0.80946						3269.47	0.99951	0.41798
3266.99	1.00143	0.91102	0.80954						3267.54	0.99951	0.41796
3265.06	1.00145	0.91105	0.80964						3265.61	0.99952	0.41796
3263.13	1.00148	0.9111	0.80976						3263.68	0.99953	0.41801
3261.2	1.00151	0.91115	0.80988						3261.76	0.99952	0.41809
3259.27	1.00154	0.91121	0.80999						3259.83	0.99951	0.41821
3257.35	1.00157	0.91127	0.81012						3257.9	0.99949	0.41836
3255.42	1.0016	0.91134	0.81026						3255.97	0.99945	0.41852
3253.49	1.00163	0.91141	0.81043						3254.04	0.9994	0.41869
3251.56	1.00166	0.91149	0.81062						3252.11	0.99936	0.41888
3249.63	1.00168	0.91156	0.81082						3250.18	0.99935	0.4191
3247.7	1.0017	0.91164	0.81102						3248.25	0.99936	0.41937
3245.77	1.00171	0.91172	0.81122						3246.32	0.99937	0.4197
3243.85	1.00171	0.91181	0.81142						3244.4	0.99936	0.42011
3241.92	1.00172	0.91189	0.81164						3242.47	0.99937	0.42059
3239.99	1.00172	0.91198	0.81187						3240.54	0.99938	0.42112
3238.06	1.00171	0.91207	0.81212						3238.61	0.99938	0.42171
3236.13	1.00171	0.91216	0.81239						3236.68	0.99937	0.42238
3234.2	1.0017	0.91227	0.81269						3234.75	0.99938	0.4231
3232.27	1.0017	0.91238	0.81301						3232.82	0.99939	0.42389
3230.35	1.0017	0.91251	0.81338						3230.89	0.9994	0.42473
3228.42	1.0017	0.91265	0.81378						3228.96	0.99943	0.42566
3226.49	1.00171	0.9128	0.81421						3227.04	0.99946	0.42666
3224.56	1.00171	0.91296	0.81466						3225.11	0.99947	0.42775
3222.63	1.00172	0.91313	0.81513						3223.18	0.99948	0.42891
3220.7	1.00173	0.91331	0.81565						3221.25	0.9995	0.43014
3218.77	1.00174	0.9135	0.81619						3219.32	0.99952	0.43146
3216.85	1.00175	0.91372	0.81676						3217.39	0.99955	0.43288
3214.92	1.00176	0.91394	0.81735						3215.46	0.99956	0.4344
3212.99	1.00177	0.91418	0.81796						3213.53	0.99956	0.436
3211.06	1.00178	0.91444	0.8186						3211.6	0.99956	0.43767
3209.13	1.00178	0.91472	0.81927						3209.68	0.99955	0.4394
3207.2	1.00178	0.915	0.81997						3207.75	0.99953	0.44122
3205.27	1.00177	0.9153	0.8207						3205.82	0.99953	0.44314
3203.35	1.00177	0.91561	0.82146						3203.89	0.99954	0.44515
3201.42	1.00176	0.91593	0.82225						3201.96	0.99954	0.44724
3199.49	1.00175	0.91626	0.82306						3200.03	0.99951	0.44941
3197.56	1.00174	0.91661	0.8239						3198.1	0.99947	0.45166
3195.63	1.00174	0.91697	0.82475						3196.17	0.99944	0.45399
3193.7	1.00174	0.91734	0.82562						3194.24	0.9994	0.4564
3191.77	1.00174	0.91773	0.82652						3192.32	0.99936	0.45888
3189.85	1.00174	0.91812	0.82745						3190.39	0.99932	0.46144
3187.92	1.00175	0.91853	0.82839						3188.46	0.99929	0.46408
3185.99	1.00176	0.91895	0.82936						3186.53	0.99924	0.4668
3184.06	1.00177	0.91937	0.83036						3184.6	0.99919	0.46959
3182.13	1.00178	0.91979	0.83136						3182.67	0.99914	0.47246
3180.2	1.00179	0.92022	0.83237						3180.74	0.99909	0.4754
3178.27	1.00179	0.92065	0.83338						3178.81	0.99904	0.47842
3176.35	1.00179	0.92108	0.8344						3176.88	0.999	0.48151
3174.42	1.00179	0.92153	0.83544						3174.96	0.99896	0.48464
3172.49	1.00179	0.92197	0.83649						3173.03	0.99894	0.48783
3170.56	1.00178	0.92243	0.83754						3171.1	0.99893	0.49108
3168.63	1.00177	0.92289	0.83859						3169.17	0.99893	0.49439
3166.7	1.00176	0.92336	0.83968						3167.24	0.99894	0.49776
3164.77	1.00174	0.92383	0.8408						3165.31	0.99895	0.50122
3162.85	1.00172	0.92432	0.84193						3163.38	0.99897	0.50475
3160.92	1.00169	0.9248	0.84309						3161.45	0.99899	0.50832
3158.99	1.00166	0.9253	0.84427						3159.52	0.99902	0.51193
3157.06	1.00163	0.9258	0.84546						3157.6	0.99905	0.51557
3155.13	1.0016	0.92631	0.84667						3155.67	0.99907	0.51927
3153.2	1.00157	0.92684	0.8479						3153.74	0.99911	0.52302
3151.27	1.00154	0.92737	0.84914						3151.81	0.99915	0.52683
3149.35	1.00152	0.92792	0.85039						3149.88	0.99917	0.5307
3147.42	1.0015	0.92847	0.85165						3147.95	0.99919	0.53461
3145.49	1.00148	0.92903	0.85293						3146.02	0.99918	0.53858
3143.56	1.00146	0.92959	0.85423						3144.09	0.99916	0.54259
3141.63	1.00145	0.93016	0.85556						3142.16	0.99913	0.54664
3139.7	1.00144	0.93073	0.85691						3140.24	0.99911	0.55071
3137.77	1.00142	0.93131	0.85826						3138.31	0.99911	0.55479
3135.85	1.00142	0.93189	0.8596						3136.38	0.99913	0.55889
3133.92	1.00141	0.93248	0.86094						3134.45	0.99918	0.56302
3131.99	1.00141	0.93308	0.8623						3132.52	0.99924	0.56718
3130.06	1.00142	0.93369	0.86367						3130.59	0.99928	0.57134
3128.13	1.00143	0.9343	0.86503						3128.66	0.99932	0.5755
3126.2	1.00145	0.93492	0.86639						3126.73	0.99937	0.57969
3124.27	1.00147	0.93554	0.86774						3124.8	0.99944	0.5839
3122.35	1.00149	0.93617	0.8691						3122.88	0.99951	0.58813
3120.42	1.00151	0.93681	0.87045						3120.95	0.99956	0.59238
3118.49	1.00154	0.93745	0.87179						3119.02	0.99961	0.59666
3116.56	1.00156	0.9381	0.8731						3117.09	0.99966	0.60094
3114.63	1.00159	0.93875	0.87438						3115.16	0.99971	0.60525
3112.7	1.00162	0.9394	0.87562						3113.23	0.99974	0.60957
3110.77	1.00164	0.94006	0.87682						3111.3	0.99975	0.6139
3108.85	1.00167	0.94071	0.87801						3109.37	0.99975	0.61824
3106.92	1.00169	0.94136	0.87918						3107.44	0.99974	0.62259
3104.99	1.0017	0.942	0.88033						3105.51	0.9997	0.62694
3103.06	1.00171	0.94264	0.88148						3103.59	0.99965	0.6313
3101.13	1.00171	0.94327	0.88264						3101.66	0.99958	0.63566
3099.2	1.0017	0.9439	0.88382						3099.73	0.99952	0.64001
3097.27	1.00169	0.94452	0.88502						3097.8	0.99946	0.64433
3095.35	1.00167	0.94514	0.88624						3095.87	0.99943	0.64861
3093.42	1.00165	0.94576	0.88744						3093.94	0.99943	0.65288
3091.49	1.00163	0.94637	0.88862						3092.01	0.99944	0.65715
3089.56	1.00161	0.94699	0.8898						3090.08	0.99945	0.66141
3087.63	1.00159	0.94759	0.89098						3088.15	0.99946	0.66566
3085.7	1.00157	0.9482	0.89219						3086.23	0.99947	0.66991
3083.77	1.00155	0.94881	0.8934						3084.3	0.99948	0.67413
3081.85	1.00154	0.94941	0.8946						3082.37	0.99952	0.67833
3079.92	1.00153	0.95001	0.89579						3080.44	0.99957	0.68251
3077.99	1.00152	0.95062	0.89697						3078.51	0.99961	0.68666
3076.06	1.00152	0.95122	0.89817						3076.58	0.99964	0.69079
3074.13	1.00152	0.95182	0.89935						3074.65	0.99967	0.6949
3072.2	1.00153	0.95243	0.90051						3072.72	0.99969	0.699
3070.27	1.00155	0.95303	0.90165						3070.79	0.99971	0.7031
3068.35	1.00157	0.95363	0.90278						3068.87	0.99971	0.70717
3066.42	1.00159	0.95422	0.90391						3066.94	0.99968	0.7112
3064.49	1.00161	0.95481	0.90507						3065.01	0.99964	0.71519
3062.56	1.00162	0.9554	0.90624						3063.08	0.99959	0.71915
3060.63	1.00164	0.95598	0.90741						3061.15	0.99953	0.72308
3058.7	1.00164	0.95655	0.90857						3059.22	0.99947	0.72698
3056.77	1.00165	0.95712	0.90974						3057.29	0.99944	0.73085
3054.85	1.00165	0.95769	0.91092						3055.36	0.99942	0.73467
3052.92	1.00164	0.95825	0.9121						3053.43	0.99943	0.73845
3050.99	1.00163	0.9588	0.91329						3051.51	0.99945	0.7422
3049.06	1.0016	0.95934	0.91447						3049.58	0.99946	0.74592
3047.13	1.00157	0.95986	0.91563						3047.65	0.99947	0.74963
3045.2	1.00151	0.96035	0.91678						3045.72	0.99947	0.75331
3043.27	1.00144	0.96083	0.91791						3043.79	0.99946	0.75694
3041.35	1.00136	0.96128	0.91903						3041.86	0.99947	0.76055
3039.42	1.00127	0.96172	0.92014						3039.93	0.99948	0.76414
3037.49	1.00118	0.96215	0.92122						3038	0.99949	0.76768
3035.56	1.00111	0.9626	0.92228						3036.07	0.99948	0.77118
3033.63	1.00108	0.96307	0.92332						3034.15	0.99946	0.77464
3031.7	1.00111	0.9636	0.92437						3032.22	0.99945	0.77807
3029.77	1.00123	0.96421	0.92543						3030.29	0.99945	0.78146
3027.85	1.00145	0.96491	0.92652						3028.36	0.99946	0.78481
3025.92	1.00178	0.96571	0.92767						3026.43	0.99948	0.78813
3023.99	1.00219	0.96659	0.92893						3024.5	0.99951	0.79142
3022.06	1.00271	0.96757	0.93035						3022.57	0.99954	0.79467
3020.13	1.00336	0.96867	0.93197						3020.64	0.99955	0.79788
3018.2	1.00419	0.96995	0.93378						3018.71	0.99956	0.80105
3016.27	1.00521	0.97141	0.93578						3016.79	0.99959	0.80418
3014.35	1.00644	0.97308	0.93797						3014.86	0.99962	0.80728
3012.42	1.00789	0.97496	0.94035						3012.93	0.99968	0.81034
3010.49	1.00957	0.97708	0.94287						3011	0.99974	0.81336
3008.56	1.01149	0.97942	0.94539						3009.07	0.9998	0.81633
3006.63	1.01363	0.98198	0.94781						3007.14	0.99985	0.81926
3004.7	1.01597	0.98474	0.95028						3005.21	0.99989	0.82216
3002.77	1.01848	0.98765	0.95316						3003.28	0.99992	0.82503
3000.85	1.02112	0.99068	0.95658						3001.35	0.99995	0.82785
2998.92	1.02384	0.99379	0.9603						2999.43	0.99997	0.83063
2996.99	1.02659	0.99693	0.96403						2997.5	0.99999	0.83337
2995.06	1.02933	1.00003	0.96763						2995.57	1.00002	0.83605
2993.13	1.03199	1.00307	0.97115						2993.64	1.00004	0.83867
2991.2	1.03454	1.00598	0.97461						2991.71	1.00006	0.84123
2989.27	1.03692	1.00872	0.97787						2989.78	1.00007	0.84374
2987.35	1.03909	1.01124	0.9808						2987.85	1.00008	0.84621
2985.42	1.041	1.01349	0.98333						2985.92	1.0001	0.84863
2983.49	1.04257	1.01541	0.98545						2983.99	1.00011	0.85102
2981.56	1.04372	1.01691	0.98713						2982.07	1.00014	0.85337
2979.63	1.04439	1.01793	0.98838						2980.14	1.00018	0.85568
2977.7	1.04458	1.01845	0.98922						2978.21	1.00021	0.85795
2975.77	1.04432	1.01853	0.98969						2976.28	1.00022	0.86018
2973.85	1.04366	1.01821	0.98978						2974.35	1.00021	0.86239
2971.92	1.04262	1.01752	0.9895						2972.42	1.00019	0.86456
2969.99	1.04125	1.01649	0.98885						2970.49	1.00016	0.86669
2968.06	1.03958	1.01517	0.98787						2968.56	1.00011	0.86879
2966.13	1.0377	1.01362	0.98654						2966.63	1.00005	0.87087
2964.2	1.03566	1.01192	0.98486						2964.71	0.99999	0.87294
2962.27	1.03352	1.01012	0.98291						2962.78	0.99996	0.87499
2960.35	1.03135	1.00828	0.98093						2960.85	0.99993	0.87702
2958.42	1.02918	1.00644	0.97927						2958.92	0.99992	0.879
2956.49	1.02707	1.00464	0.97808						2956.99	0.9999	0.88093
2954.56	1.02505	1.00294	0.97711						2955.06	0.99989	0.88283
2952.63	1.02316	1.00135	0.97615						2953.13	0.99987	0.88468
2950.7	1.02142	0.99992	0.97522						2951.2	0.99986	0.8865
2948.78	1.01985	0.99866	0.97446						2949.27	0.99986	0.88828
2946.85	1.01847	0.99758	0.97399						2947.35	0.99985	0.89003
2944.92	1.01729	0.9967	0.97371						2945.42	0.99984	0.89174
2942.99	1.01631	0.996	0.9735						2943.49	0.99981	0.89343
2941.06	1.0155	0.99548	0.97332						2941.56	0.99978	0.89507
2939.13	1.01485	0.99511	0.97322						2939.63	0.99976	0.8967
2937.2	1.01432	0.99485	0.9732						2937.7	0.99974	0.89831
2935.28	1.01387	0.99468	0.97326						2935.77	0.99974	0.89991
2933.35	1.01351	0.99458	0.97339						2933.84	0.99974	0.90148
2931.42	1.01323	0.99457	0.97363						2931.91	0.99973	0.90304
2929.49	1.01303	0.99463	0.97395						2929.99	0.9997	0.9046
2927.56	1.01289	0.99475	0.97436						2928.06	0.99967	0.90614
2925.63	1.01281	0.99492	0.97483						2926.13	0.99965	0.90766
2923.7	1.01277	0.99513	0.97536						2924.2	0.99963	0.90916
2921.78	1.0128	0.99538	0.97593						2922.27	0.99965	0.91066
2919.85	1.0129	0.99569	0.97649						2920.34	0.99968	0.91216
2917.92	1.01305	0.99606	0.97703						2918.41	0.99973	0.91364
2915.99	1.01327	0.99647	0.97754						2916.48	0.99979	0.91507
2914.06	1.01353	0.99691	0.97806						2914.55	0.99983	0.91646
2912.13	1.01382	0.99739	0.97862						2912.63	0.99987	0.9178
2910.2	1.01415	0.99789	0.97924						2910.7	0.99991	0.91912
2908.28	1.0145	0.9984	0.97993						2908.77	0.99995	0.92043
2906.35	1.01485	0.99891	0.98071						2906.84	0.99999	0.92172
2904.42	1.0152	0.99941	0.98155						2904.91	1.00003	0.92299
2902.49	1.01554	0.9999	0.98243						2902.98	1.00006	0.92423
2900.56	1.01585	1.00037	0.98328						2901.05	1.00008	0.92544
2898.63	1.01614	1.0008	0.98405						2899.12	1.00008	0.92661
2896.7	1.01638	1.00118	0.9847						2897.19	1.00006	0.92774
2894.78	1.01656	1.0015	0.98524						2895.27	1.00001	0.92885
2892.85	1.01667	1.00174	0.98567						2893.34	0.99997	0.92997
2890.92	1.01669	1.0019	0.98601						2891.41	0.99993	0.93108
2888.99	1.0166	1.00196	0.98624						2889.48	0.99989	0.93217
2887.06	1.01641	1.00191	0.98637						2887.55	0.99985	0.93324
2885.13	1.0161	1.00176	0.98641						2885.62	0.9998	0.93428
2883.2	1.01569	1.00149	0.98636						2883.69	0.99976	0.93531
2881.28	1.01519	1.00114	0.9862						2881.76	0.99972	0.93632
2879.35	1.0146	1.0007	0.98596						2879.83	0.99969	0.93732
2877.42	1.01395	1.0002	0.98562						2877.91	0.99967	0.93828
2875.49	1.01326	0.99966	0.9852						2875.98	0.99968	0.93921
2873.56	1.01254	0.99909	0.98472						2874.05	0.99969	0.94012
2871.63	1.01181	0.9985	0.98421						2872.12	0.99969	0.94101
2869.7	1.01107	0.99791	0.98369						2870.19	0.99969	0.94188
2867.78	1.01033	0.99732	0.98321						2868.26	0.99969	0.94272
2865.85	1.0096	0.99674	0.98278						2866.33	0.99971	0.94355
2863.92	1.00891	0.99619	0.98241						2864.4	0.99972	0.94436
2861.99	1.00824	0.99566	0.9821						2862.47	0.99972	0.94516
2860.06	1.00762	0.99518	0.98187						2860.55	0.99971	0.94595
2858.13	1.00705	0.99474	0.98171						2858.62	0.99969	0.94673
2856.2	1.00653	0.99434	0.98157						2856.69	0.99967	0.9475
2854.28	1.00607	0.99399	0.98141						2854.76	0.99965	0.94827
2852.35	1.00566	0.99368	0.98125						2852.83	0.99962	0.94902
2850.42	1.00529	0.99342	0.98112						2850.9	0.9996	0.94976
2848.49	1.00497	0.99319	0.98102						2848.97	0.99958	0.9505
2846.56	1.00469	0.99299	0.98097						2847.04	0.99958	0.95123
2844.63	1.00444	0.99282	0.98095						2845.11	0.99958	0.95195
2842.7	1.00422	0.99268	0.98097						2843.19	0.99957	0.95265
2840.78	1.00403	0.99256	0.98102						2841.26	0.99956	0.95334
2838.85	1.00386	0.99246	0.98108						2839.33	0.99956	0.95403
2836.92	1.00371	0.99239	0.98118						2837.4	0.99956	0.95471
2834.99	1.00359	0.99233	0.98129						2835.47	0.99955	0.95538
2833.06	1.00348	0.9923	0.9814						2833.54	0.99955	0.95603
2831.13	1.00339	0.9923	0.98152						2831.61	0.99955	0.95665
2829.2	1.00332	0.9923	0.98164						2829.68	0.99957	0.95726
2827.28	1.00325	0.99232	0.98177						2827.75	0.99958	0.95785
2825.35	1.00319	0.99235	0.98194						2825.83	0.99957	0.95842
2823.42	1.00314	0.99238	0.98211						2823.9	0.99955	0.95897
2821.49	1.00308	0.99242	0.98226						2821.97	0.99953	0.9595
2819.56	1.00302	0.99245	0.9824						2820.04	0.99951	0.96004
2817.63	1.00297	0.99248	0.98253						2818.11	0.99949	0.96056
2815.7	1.00291	0.99252	0.98267						2816.18	0.99946	0.96108
2813.78	1.00287	0.99256	0.9828						2814.25	0.99945	0.96159
2811.85	1.00282	0.9926	0.98293						2812.32	0.99943	0.9621
2809.92	1.00278	0.99264	0.98306						2810.39	0.99942	0.9626
2807.99	1.00273	0.99267	0.98319						2808.47	0.99942	0.96307
2806.06	1.00269	0.99271	0.98333						2806.54	0.99943	0.96352
2804.13	1.00265	0.99274	0.98346						2804.61	0.99945	0.96396
2802.2	1.00262	0.99277	0.98358						2802.68	0.99947	0.96439
2800.28	1.00259	0.9928	0.98369						2800.75	0.99949	0.96482
2798.35	1.00256	0.99282	0.98381						2798.82	0.99949	0.96524
2796.42	1.00254	0.99285	0.98393						2796.89	0.99948	0.96566
2794.49	1.00252	0.99288	0.98404						2794.96	0.99947	0.96609
2792.56	1.00251	0.99292	0.98415						2793.03	0.99945	0.96651
2790.63	1.0025	0.99295	0.98426						2791.11	0.99943	0.96691
2788.7	1.00249	0.99299	0.98436						2789.18	0.99941	0.96729
2786.78	1.00247	0.99302	0.98446						2787.25	0.9994	0.96767
2784.85	1.00246	0.99306	0.98454						2785.32	0.99941	0.96803
2782.92	1.00244	0.99309	0.98464						2783.39	0.99942	0.96838
2780.99	1.00242	0.99312	0.98474						2781.46	0.99944	0.96873
2779.06	1.00239	0.99315	0.98485						2779.53	0.99945	0.96906
2777.13	1.00236	0.99318	0.98496						2777.6	0.99947	0.96939
2775.2	1.00233	0.99321	0.98505						2775.67	0.99948	0.96972
2773.28	1.0023	0.99324	0.98515						2773.75	0.99949	0.97002
2771.35	1.00226	0.99327	0.98526						2771.82	0.99951	0.9703
2769.42	1.00223	0.9933	0.98537						2769.89	0.99952	0.97057
2767.49	1.0022	0.99333	0.98547						2767.96	0.99952	0.97084
2765.56	1.00218	0.99336	0.98558						2766.03	0.99952	0.97111
2763.63	1.00215	0.99339	0.98571						2764.1	0.99953	0.97136
2761.7	1.00212	0.99343	0.98583						2762.17	0.99956	0.97161
2759.78	1.0021	0.99346	0.98594						2760.24	0.99958	0.97186
2757.85	1.00208	0.99349	0.98606						2758.31	0.99959	0.9721
2755.92	1.00207	0.99352	0.98617						2756.39	0.99959	0.97234
2753.99	1.00205	0.99355	0.98627						2754.46	0.99958	0.97258
2752.06	1.00205	0.99358	0.98637						2752.53	0.99956	0.97283
2750.13	1.00204	0.99361	0.98646						2750.6	0.99953	0.97308
2748.2	1.00204	0.99364	0.98653						2748.67	0.99951	0.97334
2746.28	1.00203	0.99366	0.9866						2746.74	0.99948	0.97359
2744.35	1.00203	0.99369	0.98667						2744.81	0.99944	0.97383
2742.42	1.00202	0.99371	0.98675						2742.88	0.99942	0.97408
2740.49	1.00202	0.99374	0.98682						2740.95	0.99941	0.97433
2738.56	1.002	0.99375	0.9869						2739.03	0.99941	0.97458
2736.63	1.00199	0.99377	0.98697						2737.1	0.99943	0.97481
2734.7	1.00197	0.99378	0.98705						2735.17	0.99945	0.97502
2732.78	1.00194	0.99379	0.98713						2733.24	0.99946	0.97522
2730.85	1.00192	0.9938	0.98721						2731.31	0.99948	0.97541
2728.92	1.00189	0.99382	0.98727						2729.38	0.99948	0.97559
2726.99	1.00186	0.99383	0.98733						2727.45	0.99948	0.97576
2725.06	1.00184	0.99385	0.98738						2725.52	0.99948	0.97592
2723.13	1.00182	0.99386	0.98743						2723.59	0.99949	0.9761
2721.2	1.0018	0.99388	0.98749						2721.67	0.99951	0.97627
2719.28	1.00178	0.99389	0.98754						2719.74	0.99953	0.97644
2717.35	1.00176	0.99391	0.98759						2717.81	0.99955	0.9766
2715.42	1.00174	0.99393	0.98763						2715.88	0.99957	0.97676
2713.49	1.00173	0.99395	0.98767						2713.95	0.99958	0.97692
2711.56	1.00172	0.99396	0.98771						2712.02	0.99959	0.97708
2709.63	1.00172	0.99398	0.98775						2710.09	0.99959	0.97722
2707.7	1.00172	0.99399	0.98777						2708.16	0.99958	0.97736
2705.78	1.00173	0.994	0.9878						2706.23	0.99956	0.9775
2703.85	1.00174	0.99401	0.98783						2704.31	0.99954	0.97765
2701.92	1.00175	0.99403	0.98786						2702.38	0.99952	0.9778
2699.99	1.00177	0.99404	0.98791						2700.45	0.99949	0.97794
2698.06	1.00178	0.99406	0.98796						2698.52	0.99947	0.97808
2696.13	1.0018	0.99408	0.98803						2696.59	0.99947	0.97822
2694.2	1.00182	0.9941	0.9881						2694.66	0.99947	0.97835
2692.28	1.00183	0.99412	0.98817						2692.73	0.99947	0.97847
2690.35	1.00185	0.99414	0.98824						2690.8	0.99947	0.97858
2688.42	1.00187	0.99418	0.98831						2688.87	0.99946	0.9787
2686.49	1.00188	0.99421	0.98838						2686.95	0.99945	0.97882
2684.56	1.0019	0.99426	0.98845						2685.02	0.99945	0.97893
2682.63	1.00191	0.9943	0.98852						2683.09	0.99946	0.97904
2680.7	1.00193	0.99435	0.98859						2681.16	0.99947	0.97915
2678.78	1.00194	0.9944	0.98866						2679.23	0.99949	0.97926
2676.85	1.00195	0.99445	0.98873						2677.3	0.99951	0.97936
2674.92	1.00196	0.99451	0.98879						2675.37	0.99952	0.97946
2672.99	1.00196	0.99455	0.98884						2673.44	0.99953	0.97956
2671.06	1.00196	0.9946	0.98889						2671.51	0.99954	0.97968
2669.13	1.00197	0.99465	0.98893						2669.59	0.99954	0.97978
2667.2	1.00196	0.99469	0.98898						2667.66	0.99954	0.97988
2665.28	1.00196	0.99473	0.98902						2665.73	0.99952	0.97995
2663.35	1.00196	0.99476	0.98905						2663.8	0.9995	0.98002
2661.42	1.00196	0.99479	0.98909						2661.87	0.99948	0.98007
2659.49	1.00196	0.99482	0.98913						2659.94	0.99947	0.98013
2657.56	1.00195	0.99484	0.98918						2658.01	0.99946	0.9802
2655.63	1.00194	0.99487	0.98922						2656.08	0.99945	0.98028
2653.7	1.00193	0.99489	0.98926						2654.15	0.99945	0.98036
2651.78	1.00192	0.9949	0.9893						2652.23	0.99945	0.98043
2649.85	1.00191	0.99491	0.98934						2650.3	0.99944	0.9805
2647.92	1.00189	0.99492	0.98937						2648.37	0.99942	0.98056
2645.99	1.00187	0.99493	0.98941						2646.44	0.99941	0.98064
2644.06	1.00185	0.99493	0.98944						2644.51	0.9994	0.98071
2642.13	1.00183	0.99493	0.98946						2642.58	0.99941	0.98077
2640.2	1.0018	0.99492	0.98946						2640.65	0.99943	0.98084
2638.28	1.00177	0.99492	0.98946						2638.72	0.99944	0.98091
2636.35	1.00174	0.9949	0.98946						2636.79	0.99946	0.98099
2634.42	1.00171	0.99489	0.98945						2634.87	0.99949	0.98106
2632.49	1.00167	0.99487	0.98943						2632.94	0.99951	0.98112
2630.56	1.00164	0.99485	0.98939						2631.01	0.99951	0.98118
2628.63	1.0016	0.99483	0.98935						2629.08	0.99949	0.98125
2626.7	1.00157	0.9948	0.98932						2627.15	0.99945	0.98132
2624.78	1.00154	0.99478	0.98929						2625.22	0.99943	0.98139
2622.85	1.00151	0.99476	0.98925						2623.29	0.99941	0.98143
2620.92	1.00149	0.99475	0.98921						2621.36	0.9994	0.98145
2618.99	1.00147	0.99474	0.98918						2619.43	0.99939	0.98146
2617.06	1.00146	0.99473	0.98916						2617.51	0.99938	0.98148
2615.13	1.00145	0.99473	0.98913						2615.58	0.99937	0.9815
2613.2	1.00144	0.99474	0.98911						2613.65	0.99935	0.98153
2611.28	1.00143	0.99474	0.98908						2611.72	0.99933	0.98156
2609.35	1.00142	0.99476	0.98906						2609.79	0.99933	0.98158
2607.42	1.00141	0.99477	0.98904						2607.86	0.99934	0.98159
2605.49	1.0014	0.99478	0.98904						2605.93	0.99937	0.98159
2603.56	1.00138	0.9948	0.98901						2604	0.99939	0.98158
2601.63	1.00137	0.99481	0.98897						2602.07	0.99942	0.98157
2599.7	1.00135	0.99482	0.98893						2600.15	0.99945	0.98157
2597.78	1.00132	0.99483	0.98887						2598.22	0.99947	0.98158
2595.85	1.00129	0.99483	0.98879						2596.29	0.99949	0.98158
2593.92	1.00126	0.99483	0.98873						2594.36	0.99949	0.98159
2591.99	1.00122	0.99483	0.9887						2592.43	0.99947	0.9816
2590.06	1.00118	0.99482	0.98869						2590.5	0.99946	0.9816
2588.13	1.00114	0.99481	0.98867						2588.57	0.99945	0.9816
2586.2	1.0011	0.99479	0.98866						2586.64	0.99943	0.98158
2584.28	1.00107	0.99477	0.98865						2584.71	0.99941	0.98156
2582.35	1.00104	0.99475	0.98865						2582.79	0.9994	0.98155
2580.42	1.00103	0.99474	0.98866						2580.86	0.99941	0.98154
2578.49	1.00102	0.99472	0.98868						2578.93	0.99943	0.9815
2576.56	1.00102	0.99471	0.98871						2577	0.99944	0.98145
2574.63	1.00102	0.9947	0.98876						2575.07	0.99943	0.98141
2572.7	1.00103	0.9947	0.98882						2573.14	0.99941	0.98137
2570.78	1.00105	0.9947	0.98888						2571.21	0.99941	0.98132
2568.85	1.00106	0.99471	0.98894						2569.28	0.99942	0.98128
2566.92	1.00108	0.99471	0.98901						2567.35	0.99944	0.98123
2564.99	1.0011	0.99473	0.98911						2565.43	0.99946	0.98117
2563.06	1.00112	0.99474	0.98922						2563.5	0.99949	0.98111
2561.13	1.00115	0.99476	0.98932						2561.57	0.99953	0.98106
2559.2	1.00117	0.99477	0.98937						2559.64	0.99956	0.981
2557.28	1.00119	0.99479	0.98941						2557.71	0.99959	0.98096
2555.35	1.00121	0.9948	0.98943						2555.78	0.99959	0.98093
2553.42	1.00123	0.99481	0.98945						2553.85	0.99958	0.98091
2551.49	1.00124	0.99482	0.98945						2551.92	0.99956	0.98088
2549.56	1.00125	0.99483	0.98945						2549.99	0.99956	0.98085
2547.63	1.00125	0.99483	0.98948						2548.07	0.99955	0.9808
2545.71	1.00125	0.99484	0.98952						2546.14	0.99952	0.98075
2543.78	1.00124	0.99484	0.98953						2544.21	0.99949	0.9807
2541.85	1.00124	0.99483	0.98952						2542.28	0.99945	0.98062
2539.92	1.00123	0.99483	0.98949						2540.35	0.99943	0.98054
2537.99	1.00123	0.99482	0.98946						2538.42	0.99942	0.98048
2536.06	1.00124	0.99481	0.98944						2536.49	0.99943	0.98042
2534.13	1.00124	0.99481	0.98941						2534.56	0.99944	0.98035
2532.21	1.00125	0.99481	0.98938						2532.63	0.99943	0.98027
2530.28	1.00125	0.99481	0.98937						2530.71	0.99942	0.98019
2528.35	1.00125	0.9948	0.98936						2528.78	0.99942	0.9801
2526.42	1.00125	0.9948	0.98935						2526.85	0.99945	0.98002
2524.49	1.00125	0.99479	0.98933						2524.92	0.99948	0.97995
2522.56	1.00126	0.99479	0.98932						2522.99	0.9995	0.97988
2520.63	1.00126	0.99478	0.98931						2521.06	0.99952	0.97982
2518.71	1.00126	0.99478	0.9893						2519.13	0.99954	0.97976
2516.78	1.00126	0.99477	0.98928						2517.2	0.99954	0.97969
2514.85	1.00127	0.99475	0.98925						2515.27	0.99956	0.97964
2512.92	1.00126	0.99473	0.9892						2513.35	0.99959	0.97958
2510.99	1.00126	0.99471	0.98915						2511.42	0.99963	0.97951
2509.06	1.00125	0.99469	0.98909						2509.49	0.99965	0.97943
2507.13	1.00124	0.99467	0.98902						2507.56	0.99966	0.97933
2505.21	1.00122	0.99465	0.98893						2505.63	0.99967	0.97921
2503.28	1.00119	0.99462	0.98885						2503.7	0.99968	0.97909
2501.35	1.00116	0.9946	0.98878						2501.77	0.99968	0.97896
2499.42	1.00113	0.99457	0.9887						2499.84	0.99963	0.97884
2497.49	1.0011	0.99455	0.9886						2497.91	0.99956	0.97871
2495.56	1.00107	0.99452	0.98851						2495.99	0.9995	0.9786
2493.63	1.00104	0.9945	0.98844						2494.06	0.99946	0.9785
2491.71	1.00102	0.99449	0.98839						2492.13	0.99941	0.97841
2489.78	1.00099	0.99448	0.98834						2490.2	0.99937	0.97832
2487.85	1.00098	0.99447	0.98831						2488.27	0.99933	0.97822
2485.92	1.00096	0.99447	0.98828						2486.34	0.9993	0.97813
2483.99	1.00095	0.99446	0.98826						2484.41	0.99927	0.97804
2482.06	1.00094	0.99445	0.98822						2482.48	0.99925	0.97797
2480.13	1.00094	0.99444	0.98818						2480.55	0.99921	0.97791
2478.21	1.00093	0.99443	0.98812						2478.63	0.99918	0.97785
2476.28	1.00094	0.99442	0.98807						2476.7	0.99916	0.97779
2474.35	1.00094	0.9944	0.988						2474.77	0.99915	0.97771
2472.42	1.00095	0.99438	0.98794						2472.84	0.99915	0.97763
2470.49	1.00095	0.99436	0.98788						2470.91	0.99916	0.97755
2468.56	1.00096	0.99434	0.98782						2468.98	0.99918	0.97748
2466.63	1.00097	0.99431	0.98773						2467.05	0.99921	0.9774
2464.71	1.00099	0.99429	0.98763						2465.12	0.99924	0.97732
2462.78	1.001	0.99427	0.98753						2463.19	0.99927	0.97722
2460.85	1.00101	0.99425	0.98745						2461.27	0.99931	0.97711
2458.92	1.00101	0.99422	0.98739						2459.34	0.99937	0.977
2456.99	1.00102	0.9942	0.98735						2457.41	0.99942	0.97688
2455.06	1.00103	0.99419	0.98733						2455.48	0.99945	0.97674
2453.13	1.00105	0.99418	0.98732						2453.55	0.99947	0.97661
2451.21	1.00107	0.99418	0.98732						2451.62	0.9995	0.97648
2449.28	1.00108	0.99418	0.98734						2449.69	0.99953	0.97636
2447.35	1.0011	0.99418	0.98737						2447.76	0.99954	0.97624
2445.42	1.00113	0.99419	0.98741						2445.83	0.99954	0.97612
2443.49	1.00115	0.9942	0.98745						2443.91	0.99953	0.97601
2441.56	1.00118	0.99422	0.9875						2441.98	0.99951	0.97589
2439.63	1.0012	0.99423	0.98757						2440.05	0.99949	0.97577
2437.71	1.00121	0.99424	0.98763						2438.12	0.99945	0.97565
2435.78	1.00122	0.99424	0.98769						2436.19	0.99942	0.97554
2433.85	1.00123	0.99425	0.98774						2434.26	0.99939	0.97544
2431.92	1.00123	0.99425	0.98778						2432.33	0.99938	0.97534
2429.99	1.00123	0.99425	0.9878						2430.4	0.99935	0.97523
2428.06	1.00123	0.99424	0.9878						2428.47	0.99931	0.97511
2426.13	1.00122	0.99423	0.98779						2426.55	0.99928	0.975
2424.21	1.00121	0.99422	0.98777						2424.62	0.99928	0.97489
2422.28	1.0012	0.99421	0.98773						2422.69	0.9993	0.9748
2420.35	1.00119	0.99421	0.98767						2420.76	0.99932	0.97471
2418.42	1.00119	0.99423	0.9876						2418.83	0.99935	0.97461
2416.49	1.00118	0.99427	0.98754						2416.9	0.99939	0.97448
2414.56	1.00118	0.99433	0.98749						2414.97	0.99945	0.97434
2412.63	1.00119	0.99442	0.98743						2413.04	0.99951	0.97419
2410.71	1.0012	0.99455	0.98736						2411.11	0.9996	0.97402
2408.78	1.00123	0.9947	0.98729						2409.19	0.99975	0.97385
2406.85	1.00126	0.99488	0.98723						2407.26	0.99997	0.97369
2404.92	1.00129	0.99506	0.98718						2405.33	1.00023	0.97354
2402.99	1.00132	0.99522	0.98713						2403.4	1.00049	0.97339
2401.06	1.00134	0.99533	0.98709						2401.47	1.00072	0.97324
2399.13	1.00135	0.99536	0.98706						2399.54	1.00089	0.97308
2397.21	1.00134	0.99524	0.98703						2397.61	1.00093	0.97289
2395.28	1.00128	0.9949	0.98701						2395.68	1.00079	0.9727
2393.35	1.00117	0.99426	0.98698						2393.75	1.00036	0.97252
2391.42	1.00099	0.99327	0.98695						2391.83	0.99951	0.97233
2389.49	1.00073	0.99188	0.98693						2389.9	0.99812	0.97217
2387.56	1.00039	0.9901	0.98689						2387.97	0.99612	0.97205
2385.63	0.99997	0.98795	0.98684						2386.04	0.99349	0.97188
2383.71	0.99948	0.98544	0.98681						2384.11	0.99007	0.97163
2381.78	0.99893	0.98264	0.98689						2382.18	0.98574	0.9713
2379.85	0.99833	0.97958	0.987						2380.25	0.98053	0.97087
2377.92	0.99768	0.97634	0.98699						2378.32	0.97455	0.9704
2375.99	0.997	0.97299	0.98686						2376.39	0.968	0.96992
2374.06	0.99632	0.96961	0.98668						2374.47	0.96126	0.96943
2372.13	0.99564	0.9663	0.98648						2372.54	0.95489	0.96896
2370.21	0.995	0.96315	0.98628						2370.61	0.94938	0.96854
2368.28	0.99442	0.96027	0.98611						2368.68	0.94504	0.96819
2366.35	0.9939	0.95773	0.98594						2366.75	0.94175	0.96787
2364.42	0.99346	0.9556	0.98579						2364.82	0.93918	0.96754
2362.49	0.99311	0.95394	0.98565						2362.89	0.93717	0.96722
2360.56	0.99286	0.95276	0.9855						2360.96	0.93575	0.96693
2358.63	0.9927	0.95206	0.98533						2359.03	0.935	0.96669
2356.71	0.99266	0.95183	0.98519						2357.11	0.93493	0.96653
2354.78	0.99272	0.952	0.9851						2355.18	0.9355	0.96637
2352.85	0.99285	0.95249	0.98508						2353.25	0.93662	0.96621
2350.92	0.99304	0.95319	0.98507						2351.32	0.93815	0.96606
2348.99	0.99327	0.95398	0.98505						2349.39	0.93994	0.96596
2347.06	0.9935	0.95482	0.98504						2347.46	0.94182	0.96589
2345.13	0.99375	0.95566	0.98504						2345.53	0.94365	0.96579
2343.21	0.99399	0.95653	0.98506						2343.6	0.94533	0.96571
2341.28	0.99424	0.95744	0.98509						2341.67	0.94681	0.96565
2339.35	0.9945	0.95839	0.98517						2339.75	0.94801	0.96555
2337.42	0.99476	0.95937	0.98534						2337.82	0.94883	0.96542
2335.49	0.99502	0.96039	0.98553						2335.89	0.94933	0.96525
2333.56	0.99528	0.96143	0.98559						2333.96	0.9497	0.96505
2331.63	0.99553	0.96251	0.98551						2332.03	0.95014	0.96488
2329.71	0.99579	0.96365	0.98544						2330.1	0.95092	0.96478
2327.78	0.99605	0.96486	0.98539						2328.17	0.95239	0.96471
2325.85	0.99632	0.96617	0.98533						2326.24	0.95474	0.96467
2323.92	0.99659	0.96757	0.98528						2324.31	0.95784	0.96466
2321.99	0.99687	0.96908	0.98522						2322.39	0.9613	0.96465
2320.06	0.99715	0.97067	0.98515						2320.46	0.96462	0.96459
2318.13	0.99743	0.97234	0.98506						2318.53	0.96758	0.96449
2316.21	0.99771	0.97406	0.98498						2316.6	0.97035	0.96439
2314.28	0.998	0.97579	0.9849						2314.67	0.97307	0.96429
2312.35	0.99829	0.9775	0.98482						2312.74	0.97573	0.96419
2310.42	0.99858	0.97917	0.98478						2310.81	0.97826	0.96409
2308.49	0.99884	0.98075	0.98478						2308.88	0.9806	0.96393
2306.56	0.99909	0.98219	0.98476						2306.95	0.98275	0.96372
2304.63	0.99931	0.98348	0.98469						2305.03	0.98471	0.96351
2302.71	0.9995	0.9846	0.98458						2303.1	0.98649	0.9633
2300.78	0.99966	0.98559	0.98447						2301.17	0.9881	0.96308
2298.85	0.9998	0.98647	0.98438						2299.24	0.98955	0.96283
2296.92	0.99993	0.98725	0.9843						2297.31	0.99085	0.96261
2294.99	1.00005	0.98796	0.98424						2295.38	0.99204	0.96244
2293.06	1.00014	0.98858	0.98423						2293.45	0.99316	0.96227
2291.13	1.00023	0.98911	0.98424						2291.52	0.99417	0.9621
2289.21	1.00029	0.98957	0.98423						2289.59	0.99501	0.96192
2287.28	1.00034	0.98995	0.98421						2287.67	0.99565	0.96173
2285.35	1.00038	0.99028	0.9842						2285.74	0.99613	0.96153
2283.42	1.00041	0.99055	0.98415						2283.81	0.99652	0.96134
2281.49	1.00042	0.99078	0.98405						2281.88	0.99687	0.96115
2279.56	1.00043	0.99096	0.98393						2279.95	0.99717	0.96094
2277.63	1.00042	0.9911	0.98383						2278.02	0.99739	0.96072
2275.71	1.0004	0.99119	0.98373						2276.09	0.99752	0.96052
2273.78	1.00038	0.99125	0.98362						2274.16	0.99757	0.96035
2271.85	1.00035	0.99127	0.98352						2272.23	0.99757	0.96017
2269.92	1.00032	0.99127	0.98344						2270.31	0.99754	0.95997
2267.99	1.00029	0.99125	0.98333						2268.38	0.99747	0.95976
2266.06	1.00025	0.99123	0.9832						2266.45	0.99737	0.95956
2264.13	1.00023	0.99121	0.98309						2264.52	0.99729	0.95937
2262.21	1.0002	0.9912	0.98299						2262.59	0.99727	0.95915
2260.28	1.00019	0.9912	0.9829						2260.66	0.99732	0.95889
2258.35	1.00019	0.99121	0.98279						2258.73	0.99743	0.95861
2256.42	1.00019	0.99124	0.9827						2256.8	0.99759	0.95829
2254.49	1.00021	0.99128	0.98263						2254.87	0.99778	0.95794
2252.56	1.00023	0.99134	0.98258						2252.95	0.99801	0.9576
2250.63	1.00027	0.9914	0.98252						2251.02	0.99824	0.95727
2248.71	1.0003	0.99148	0.98246						2249.09	0.99842	0.95697
2246.78	1.00035	0.99156	0.98242						2247.16	0.99857	0.95669
2244.85	1.00039	0.99163	0.98238						2245.23	0.99869	0.95643
2242.92	1.00043	0.9917	0.98234						2243.3	0.99876	0.95618
2240.99	1.00046	0.99176	0.98231						2241.37	0.99885	0.95593
2239.06	1.00049	0.99181	0.98229						2239.44	0.99898	0.95567
2237.13	1.0005	0.99184	0.98227						2237.51	0.99912	0.95545
2235.21	1.00051	0.99186	0.98222						2235.59	0.99922	0.95525
2233.28	1.00049	0.99185	0.98217						2233.66	0.99926	0.95504
2231.35	1.00046	0.99183	0.98212						2231.73	0.99926	0.95485
2229.42	1.00042	0.99179	0.98205						2229.8	0.99924	0.95469
2227.49	1.00037	0.99173	0.98198						2227.87	0.99922	0.9545
2225.56	1.00031	0.99165	0.98191						2225.94	0.99923	0.95423
2223.63	1.00023	0.99156	0.9818						2224.01	0.99922	0.95392
2221.71	1.00014	0.99145	0.98166						2222.08	0.99916	0.95363
2219.78	1.00005	0.99134	0.98151						2220.15	0.99909	0.95337
2217.85	0.99996	0.99124	0.98138						2218.22	0.99902	0.9531
2215.92	0.99988	0.99115	0.98127						2216.3	0.99898	0.95281
2213.99	0.99981	0.99108	0.98114						2214.37	0.99897	0.95251
2212.06	0.99976	0.99103	0.98101						2212.44	0.99896	0.95218
2210.13	0.99975	0.99099	0.9809						2210.51	0.99896	0.95181
2208.21	0.99976	0.99098	0.98081						2208.58	0.99896	0.95142
2206.28	0.99979	0.991	0.98072						2206.65	0.99895	0.95106
2204.35	0.99984	0.99104	0.98063						2204.72	0.99892	0.95077
2202.42	0.9999	0.9911	0.98053						2202.79	0.9989	0.95056
2200.49	0.99998	0.99118	0.98044						2200.86	0.99888	0.95038
2198.56	1.00007	0.99125	0.98037						2198.94	0.99883	0.95019
2196.63	1.00015	0.99132	0.98033						2197.01	0.99879	0.94999
2194.71	1.00023	0.99137	0.98031						2195.08	0.99882	0.94977
2192.78	1.00031	0.99142	0.98033						2193.15	0.99892	0.94956
2190.85	1.00038	0.99145	0.98037						2191.22	0.99901	0.94938
2188.92	1.00043	0.99146	0.98034						2189.29	0.99899	0.94919
2186.99	1.00047	0.99146	0.98024						2187.36	0.99888	0.94902
2185.06	1.0005	0.99143	0.98012						2185.43	0.99876	0.94887
2183.13	1.00051	0.99138	0.97997						2183.5	0.99869	0.94871
2181.21	1.00052	0.99132	0.97981						2181.58	0.99866	0.94844
2179.28	1.00051	0.99124	0.97963						2179.65	0.99865	0.94812
2177.35	1.00049	0.99115	0.97944						2177.72	0.99864	0.94788
2175.42	1.00047	0.99105	0.97927						2175.79	0.99864	0.94776
2173.49	1.00044	0.99097	0.97913						2173.86	0.99869	0.94765
2171.56	1.00043	0.9909	0.97901						2171.93	0.9988	0.94751
2169.63	1.00044	0.99086	0.9789						2170	0.99896	0.94736
2167.71	1.00047	0.99085	0.97882						2168.07	0.99912	0.9472
2165.78	1.00053	0.99087	0.97883						2166.14	0.99922	0.947
2163.85	1.00061	0.99092	0.97891						2164.22	0.9993	0.94681
2161.92	1.00069	0.991	0.97902						2162.29	0.99938	0.94667
2159.99	1.00077	0.9911	0.97911						2160.36	0.9995	0.94657
2158.06	1.00086	0.9912	0.97917						2158.43	0.99962	0.94645
2156.14	1.00095	0.9913	0.9792						2156.5	0.99971	0.94628
2154.21	1.00104	0.9914	0.97924						2154.57	0.99976	0.94604
2152.28	1.00112	0.99147	0.9793						2152.64	0.9998	0.94575
2150.35	1.00119	0.99151	0.97936						2150.71	0.99989	0.94544
2148.42	1.00125	0.99153	0.97943						2148.78	0.99999	0.94513
2146.49	1.00129	0.99153	0.97951						2146.86	1.00002	0.94483
2144.56	1.00132	0.9915	0.97953						2144.93	0.99995	0.94457
2142.64	1.00133	0.99145	0.97944						2143	0.9998	0.94436
2140.71	1.00131	0.99137	0.97934						2141.07	0.99966	0.9442
2138.78	1.00129	0.99127	0.97929						2139.14	0.99956	0.94405
2136.85	1.00125	0.99116	0.97924						2137.21	0.99949	0.94386
2134.92	1.0012	0.99104	0.97914						2135.28	0.99945	0.94364
2132.99	1.00114	0.9909	0.97901						2133.35	0.99944	0.94344
2131.06	1.00107	0.99076	0.97888						2131.42	0.99946	0.94329
2129.14	1.001	0.99063	0.97876						2129.5	0.9995	0.94314
2127.21	1.00093	0.9905	0.97865						2127.57	0.99957	0.94301
2125.28	1.00086	0.99039	0.97858						2125.64	0.99962	0.94294
2123.35	1.0008	0.9903	0.97854						2123.71	0.99964	0.94294
2121.42	1.00074	0.99022	0.97855						2121.78	0.99963	0.94298
2119.49	1.00069	0.99015	0.97856						2119.85	0.9996	0.94307
2117.56	1.00064	0.99009	0.97857						2117.92	0.99957	0.9432
2115.64	1.00059	0.99004	0.97853						2115.99	0.99954	0.9433
2113.71	1.00056	0.99	0.97844						2114.06	0.99952	0.94332
2111.78	1.00055	0.98998	0.97836						2112.14	0.99949	0.94332
2109.85	1.00055	0.98997	0.97831						2110.21	0.99946	0.94334
2107.92	1.00057	0.98997	0.97831						2108.28	0.99948	0.94338
2105.99	1.0006	0.98998	0.97833						2106.35	0.99951	0.94343
2104.06	1.00063	0.98999	0.97838						2104.42	0.99949	0.94349
2102.14	1.00066	0.99001	0.97844						2102.49	0.99943	0.94355
2100.21	1.00069	0.99003	0.9785						2100.56	0.99936	0.94364
2098.28	1.00073	0.99006	0.97859						2098.63	0.99934	0.94374
2096.35	1.00075	0.9901	0.9787						2096.7	0.99936	0.94383
2094.42	1.00078	0.99015	0.97883						2094.78	0.99939	0.94393
2092.49	1.00081	0.9902	0.97893						2092.85	0.99942	0.94402
2090.56	1.00084	0.99027	0.97894						2090.92	0.99945	0.9441
2088.64	1.00086	0.99034	0.97889						2088.99	0.99949	0.94415
2086.71	1.00088	0.9904	0.97885						2087.06	0.99952	0.94421
2084.78	1.00089	0.99046	0.97888						2085.13	0.99954	0.94428
2082.85	1.00089	0.99053	0.97896						2083.2	0.99955	0.94437
2080.92	1.00088	0.99058	0.97905						2081.27	0.99954	0.94452
2078.99	1.00085	0.99064	0.97912						2079.34	0.9995	0.94473
2077.06	1.00082	0.99069	0.97917						2077.42	0.99948	0.94495
2075.14	1.00078	0.99073	0.97923						2075.49	0.99948	0.94516
2073.21	1.00074	0.99076	0.9793						2073.56	0.99948	0.9454
2071.28	1.00069	0.9908	0.97934						2071.63	0.99948	0.94565
2069.35	1.00065	0.99084	0.97933						2069.7	0.99946	0.94589
2067.42	1.00062	0.99089	0.9793						2067.77	0.99941	0.94611
2065.49	1.0006	0.99095	0.97931						2065.84	0.99937	0.94632
2063.56	1.00058	0.99101	0.97937						2063.91	0.99935	0.94656
2061.64	1.00055	0.99105	0.97946						2061.98	0.99932	0.94686
2059.71	1.00052	0.99109	0.97957						2060.06	0.99929	0.94718
2057.78	1.00048	0.99112	0.97966						2058.13	0.99928	0.94748
2055.85	1.00045	0.99116	0.9797						2056.2	0.99926	0.94774
2053.92	1.00041	0.99121	0.97973						2054.27	0.99919	0.94802
2051.99	1.00038	0.99128	0.97976						2052.34	0.99911	0.94832
2050.06	1.00036	0.99135	0.97976						2050.41	0.99911	0.94863
2048.14	1.00036	0.99143	0.97971						2048.48	0.99913	0.94896
2046.21	1.00036	0.99152	0.97966						2046.55	0.99911	0.94932
2044.28	1.00038	0.99161	0.97966						2044.62	0.99903	0.94973
2042.35	1.00039	0.9917	0.97971						2042.7	0.99893	0.95016
2040.42	1.00041	0.99179	0.97981						2040.77	0.99882	0.9506
2038.49	1.00042	0.99187	0.97995						2038.84	0.99871	0.95097
2036.56	1.00042	0.99196	0.98014						2036.91	0.99862	0.95128
2034.64	1.00042	0.99206	0.98034						2034.98	0.99859	0.95161
2032.71	1.00042	0.99216	0.98056						2033.05	0.9986	0.952
2030.78	1.00042	0.99226	0.98081						2031.12	0.99868	0.95243
2028.85	1.00042	0.99236	0.98106						2029.19	0.99884	0.95282
2026.92	1.00042	0.99246	0.98125						2027.26	0.99903	0.95315
2024.99	1.00043	0.99255	0.98139						2025.34	0.9992	0.95341
2023.06	1.00044	0.99263	0.98157						2023.41	0.99932	0.95363
2021.14	1.00045	0.99269	0.98182						2021.48	0.99941	0.95379
2019.21	1.00045	0.99272	0.98211						2019.55	0.99945	0.95397
2017.28	1.00044	0.99271	0.98237						2017.62	0.99943	0.95423
2015.35	1.00042	0.99267	0.98257						2015.69	0.9994	0.95453
2013.42	1.00039	0.99262	0.98272						2013.76	0.99945	0.95482
2011.49	1.00036	0.99257	0.98279						2011.83	0.99954	0.95509
2009.56	1.00033	0.99252	0.98283						2009.9	0.99959	0.95539
2007.64	1.0003	0.99247	0.98287						2007.98	0.99959	0.95573
2005.71	1.00027	0.99243	0.98288						2006.05	0.99964	0.95611
2003.78	1.00024	0.99239	0.98282						2004.12	0.99973	0.95651
2001.85	1.00021	0.99234	0.98275						2002.19	0.99978	0.95692
1999.92	1.00018	0.99229	0.98275						2000.26	0.99977	0.95729
1997.99	1.00014	0.99224	0.98278						1998.33	0.99971	0.95764
1996.06	1.0001	0.99219	0.9828						1996.4	0.99965	0.95801
1994.14	1.00007	0.99214	0.98282						1994.47	0.9996	0.9584
1992.21	1.00004	0.99212	0.98287						1992.54	0.99957	0.95877
1990.28	1.00003	0.99212	0.98294						1990.62	0.99955	0.95911
1988.35	1.00004	0.99216	0.98299						1988.69	0.99956	0.95945
1986.42	1.00007	0.99221	0.98305						1986.76	0.99957	0.95982
1984.49	1.00012	0.99228	0.98316						1984.83	0.99955	0.96015
1982.56	1.00019	0.99237	0.98329						1982.9	0.99953	0.96037
1980.64	1.00028	0.99247	0.98343						1980.97	0.99953	0.96054
1978.71	1.00038	0.99257	0.98362						1979.04	0.99951	0.96074
1976.78	1.0005	0.99266	0.98385						1977.11	0.99944	0.96097
1974.85	1.00062	0.99274	0.98406						1975.18	0.99933	0.96121
1972.92	1.00074	0.9928	0.98424						1973.26	0.99919	0.96147
1970.99	1.00086	0.99286	0.98438						1971.33	0.99905	0.96175
1969.06	1.00097	0.99292	0.98449						1969.4	0.99899	0.96204
1967.14	1.00106	0.99299	0.9846						1967.47	0.99904	0.9623
1965.21	1.00114	0.99307	0.98474						1965.54	0.99912	0.96247
1963.28	1.0012	0.99316	0.98492						1963.61	0.99922	0.96259
1961.35	1.00123	0.99324	0.98508						1961.68	0.99936	0.96272
1959.42	1.00124	0.99331	0.98518						1959.75	0.99953	0.96289
1957.49	1.00122	0.99337	0.98524						1957.82	0.99972	0.96306
1955.56	1.00119	0.99342	0.98532						1955.9	0.99992	0.96318
1953.64	1.00114	0.99346	0.98539						1953.97	1.0001	0.96326
1951.71	1.00108	0.99349	0.98546						1952.04	1.00024	0.96337
1949.78	1.001	0.9935	0.9855						1950.11	1.00032	0.96353
1947.85	1.00093	0.9935	0.98548						1948.18	1.00034	0.96365
1945.92	1.00086	0.9935	0.98542						1946.25	1.00029	0.96369
1943.99	1.0008	0.9935	0.98535						1944.32	1.00023	0.9637
1942.06	1.00075	0.9935	0.9853						1942.39	1.00019	0.96377
1940.14	1.00071	0.9935	0.98531						1940.46	1.00016	0.96389
1938.21	1.00069	0.99349	0.98537						1938.54	1.00017	0.96403
1936.28	1.00069	0.99349	0.98541						1936.61	1.00021	0.96419
1934.35	1.00071	0.99349	0.98538						1934.68	1.00025	0.96439
1932.42	1.00074	0.99348	0.98533						1932.75	1.00023	0.96459
1930.49	1.00078	0.99346	0.98531						1930.82	1.00017	0.96476
1928.56	1.00083	0.99344	0.98533						1928.89	1.00012	0.96488
1926.64	1.00088	0.99341	0.98535						1926.96	1.00008	0.96499
1924.71	1.00094	0.99339	0.98536						1925.03	1.00007	0.96509
1922.78	1.00101	0.99339	0.98538						1923.1	1.00008	0.96516
1920.85	1.00107	0.99339	0.98541						1921.18	1.0001	0.96517
1918.92	1.00113	0.99341	0.98546						1919.25	1.00012	0.96515
1916.99	1.00117	0.99343	0.98552						1917.32	1.00014	0.96514
1915.06	1.00121	0.99344	0.98556						1915.39	1.00014	0.96517
1913.14	1.00124	0.99346	0.98555						1913.46	1.00011	0.96523
1911.21	1.00125	0.99349	0.98554						1911.53	1.00012	0.96528
1909.28	1.00126	0.99352	0.98557						1909.6	1.00014	0.96532
1907.35	1.00125	0.99355	0.98563						1907.67	1.00015	0.96533
1905.42	1.00124	0.99358	0.9857						1905.74	1.00012	0.96532
1903.49	1.00122	0.99361	0.98576						1903.82	1.00006	0.9653
1901.56	1.0012	0.99364	0.98577						1901.89	0.99999	0.96529
1899.64	1.00119	0.99367	0.98577						1899.96	0.99998	0.96532
1897.71	1.00117	0.9937	0.98578						1898.03	1.00002	0.96541
1895.78	1.00115	0.99373	0.9858						1896.1	1.00004	0.96551
1893.85	1.00114	0.99375	0.98582						1894.17	0.99999	0.9656
1891.92	1.00113	0.99377	0.98582						1892.24	0.99989	0.96567
1889.99	1.00112	0.99378	0.98587						1890.31	0.99986	0.96571
1888.06	1.0011	0.99379	0.986						1888.38	0.99994	0.96572
1886.14	1.00108	0.99378	0.9862						1886.46	1.00009	0.96569
1884.21	1.00106	0.99377	0.98643						1884.53	1.00027	0.96565
1882.28	1.00104	0.99375	0.98663						1882.6	1.00044	0.96562
1880.35	1.00103	0.99372	0.98677						1880.67	1.0006	0.96559
1878.42	1.00103	0.99369	0.98687						1878.74	1.00072	0.96557
1876.49	1.00103	0.99366	0.98693						1876.81	1.00077	0.96554
1874.56	1.00103	0.99362	0.98694						1874.88	1.00075	0.96551
1872.64	1.00103	0.99356	0.98691						1872.95	1.00066	0.96547
1870.71	1.00102	0.99351	0.98685						1871.02	1.00054	0.96541
1868.78	1.00101	0.99346	0.98675						1869.1	1.0004	0.96534
1866.85	1.001	0.99343	0.98671						1867.17	1.00036	0.96528
1864.92	1.00098	0.99341	0.9868						1865.24	1.00048	0.96524
1862.99	1.00097	0.99339	0.98697						1863.31	1.00063	0.9652
1861.06	1.00097	0.99338	0.98711						1861.38	1.00072	0.96516
1859.14	1.00099	0.99337	0.98719						1859.45	1.00079	0.96513
1857.21	1.00102	0.99336	0.9872						1857.52	1.00083	0.9651
1855.28	1.00105	0.99334	0.98712						1855.59	1.00081	0.96507
1853.35	1.0011	0.99332	0.98698						1853.66	1.00073	0.96502
1851.42	1.00115	0.9933	0.98688						1851.74	1.00065	0.96494
1849.49	1.0012	0.99327	0.98684						1849.81	1.00061	0.96482
1847.56	1.00125	0.99324	0.98684						1847.88	1.00065	0.96467
1845.64	1.00129	0.99321	0.98695						1845.95	1.00084	0.96452
1843.71	1.00132	0.99318	0.98714						1844.02	1.00121	0.96435
1841.78	1.00134	0.99315	0.98731						1842.09	1.00156	0.96417
1839.85	1.00135	0.99311	0.98739						1840.16	1.00181	0.96397
1837.92	1.00136	0.99307	0.98739						1838.23	1.00193	0.96376
1835.99	1.00136	0.99302	0.98732						1836.3	1.00195	0.96356
1834.06	1.00136	0.99298	0.98719						1834.38	1.0019	0.96336
1832.14	1.00136	0.99292	0.98706						1832.45	1.00185	0.96314
1830.21	1.00135	0.99286	0.98691						1830.52	1.0018	0.9629
1828.28	1.00132	0.9928	0.98671						1828.59	1.00171	0.96264
1826.35	1.00129	0.99273	0.98644						1826.66	1.00156	0.96236
1824.42	1.00125	0.99267	0.98615						1824.73	1.00138	0.96207
1822.49	1.00121	0.99261	0.98594						1822.8	1.00127	0.96179
1820.56	1.00118	0.99256	0.98585						1820.87	1.00128	0.96151
1818.64	1.00116	0.99249	0.98579						1818.94	1.00132	0.96124
1816.71	1.00115	0.99242	0.98566						1817.02	1.00128	0.96095
1814.78	1.00116	0.99234	0.98551						1815.09	1.00124	0.96066
1812.85	1.00118	0.99226	0.98546						1813.16	1.00132	0.96035
1810.92	1.0012	0.99219	0.98544						1811.23	1.00146	0.96003
1808.99	1.00124	0.99212	0.9854						1809.3	1.00157	0.95968
1807.06	1.00128	0.99205	0.98537						1807.37	1.00169	0.95931
1805.14	1.00133	0.99198	0.9854						1805.44	1.00186	0.95893
1803.21	1.00139	0.99191	0.98545						1803.51	1.00205	0.95852
1801.28	1.00146	0.99184	0.98548						1801.58	1.00226	0.95811
1799.35	1.00152	0.99177	0.98547						1799.66	1.00243	0.95768
1797.42	1.00158	0.9917	0.98534						1797.73	1.00248	0.95722
1795.49	1.00164	0.99163	0.98514						1795.8	1.00243	0.95673
1793.56	1.00171	0.99157	0.98503						1793.87	1.00244	0.9562
1791.64	1.00176	0.99151	0.98503						1791.94	1.00253	0.95567
1789.71	1.00181	0.99146	0.98507						1790.01	1.00265	0.95513
1787.78	1.00185	0.99141	0.9851						1788.08	1.00279	0.95456
1785.85	1.0019	0.99137	0.98507						1786.15	1.0029	0.95396
1783.92	1.00193	0.99131	0.98499						1784.22	1.00295	0.95332
1781.99	1.00197	0.99125	0.98484						1782.3	1.00293	0.95265
1780.06	1.002	0.99117	0.98467						1780.37	1.00288	0.95194
1778.14	1.00203	0.99108	0.9845						1778.44	1.00284	0.95122
1776.21	1.00205	0.99098	0.98431						1776.51	1.0028	0.95046
1774.28	1.00208	0.99086	0.98402						1774.58	1.00268	0.94966
1772.35	1.00209	0.99074	0.98369						1772.65	1.0025	0.94884
1770.42	1.00211	0.9906	0.98347						1770.72	1.00247	0.94798
1768.49	1.00212	0.99045	0.98342						1768.79	1.00267	0.94708
1766.57	1.00214	0.99029	0.98343						1766.86	1.00298	0.94613
1764.64	1.00217	0.9901	0.98336						1764.94	1.00325	0.94512
1762.71	1.00221	0.98989	0.9832						1763.01	1.00343	0.94405
1760.78	1.00226	0.98966	0.98299						1761.08	1.00358	0.9429
1758.85	1.00231	0.98943	0.98269						1759.15	1.00368	0.94166
1756.92	1.00236	0.98918	0.98235						1757.22	1.00376	0.9404
1754.99	1.00241	0.98893	0.98208						1755.29	1.00389	0.93908
1753.07	1.00246	0.98866	0.98187						1753.36	1.0041	0.93767
1751.14	1.00252	0.98838	0.98168						1751.43	1.00436	0.93616
1749.21	1.00257	0.98811	0.98152						1749.5	1.00468	0.93455
1747.28	1.00261	0.98784	0.98138						1747.58	1.00503	0.93284
1745.35	1.00265	0.98758	0.98112						1745.65	1.00527	0.93103
1743.42	1.00267	0.98731	0.98062						1743.72	1.0053	0.9291
1741.49	1.00269	0.98705	0.97984						1741.79	1.00507	0.92709
1739.57	1.00269	0.98678	0.97899						1739.86	1.00473	0.92503
1737.64	1.00268	0.98649	0.97832						1737.93	1.00461	0.92287
1735.71	1.00267	0.98619	0.97773						1736	1.00467	0.92056
1733.78	1.00265	0.98587	0.97706						1734.07	1.00472	0.91809
1731.85	1.00262	0.98553	0.97622						1732.14	1.00465	0.91547
1729.92	1.00259	0.98516	0.97518						1730.22	1.00442	0.91272
1727.99	1.00257	0.98476	0.97405						1728.29	1.00411	0.90984
1726.07	1.00254	0.98432	0.97297						1726.36	1.00394	0.90678
1724.14	1.00253	0.98384	0.97194						1724.43	1.00395	0.90355
1722.21	1.00253	0.9833	0.97088						1722.5	1.00397	0.90021
1720.28	1.00255	0.98271	0.96983						1720.57	1.00406	0.89671
1718.35	1.00259	0.98208	0.96891						1718.64	1.00437	0.89305
1716.42	1.00262	0.98141	0.96801						1716.71	1.00479	0.88915
1714.49	1.00265	0.98071	0.96697						1714.78	1.00517	0.88498
1712.57	1.00268	0.97999	0.96577						1712.86	1.00544	0.88059
1710.64	1.00272	0.97923	0.96447						1710.93	1.00567	0.87599
1708.71	1.00277	0.97843	0.9631						1709	1.00594	0.87116
1706.78	1.00282	0.9776	0.96169						1707.07	1.00622	0.86623
1704.85	1.00288	0.97675	0.96026						1705.14	1.00647	0.86111
1702.92	1.00293	0.97587	0.95869						1703.21	1.00666	0.85567
1700.99	1.00297	0.97498	0.95693						1701.28	1.00675	0.84996
1699.07	1.003	0.97408	0.95497						1699.35	1.00671	0.84406
1697.14	1.00301	0.97318	0.95286						1697.42	1.00652	0.83803
1695.21	1.00299	0.97227	0.95066						1695.5	1.00629	0.83184
1693.28	1.00296	0.97136	0.94857						1693.57	1.0062	0.8255
1691.35	1.00292	0.97044	0.94666						1691.64	1.00641	0.819
1689.42	1.00287	0.96951	0.9446						1689.71	1.00661	0.81224
1687.49	1.00281	0.96856	0.94224						1687.78	1.00657	0.80528
1685.57	1.00275	0.9676	0.93968						1685.85	1.00634	0.79825
1683.64	1.00269	0.96661	0.93706						1683.92	1.00607	0.79116
1681.71	1.00262	0.96561	0.93439						1681.99	1.00584	0.78391
1679.78	1.00255	0.96459	0.93156						1680.06	1.00559	0.7765
1677.85	1.00248	0.96354	0.92861						1678.14	1.00523	0.76908
1675.92	1.00242	0.96247	0.92579						1676.21	1.00492	0.76184
1673.99	1.00237	0.96138	0.92322						1674.28	1.00479	0.75451
1672.07	1.00232	0.96028	0.92063						1672.35	1.00475	0.74702
1670.14	1.00228	0.95917	0.91793						1670.42	1.00462	0.73948
1668.21	1.00224	0.95806	0.91529						1668.49	1.00457	0.73198
1666.28	1.00222	0.95693	0.91273						1666.56	1.00459	0.72452
1664.35	1.00221	0.9558	0.91019						1664.63	1.00461	0.71714
1662.42	1.00222	0.95466	0.90768						1662.7	1.0046	0.70992
1660.49	1.00224	0.95354	0.90529						1660.78	1.00456	0.70291
1658.57	1.00227	0.95244	0.90308						1658.85	1.00465	0.69596
1656.64	1.0023	0.95137	0.90101						1656.92	1.00486	0.68914
1654.71	1.00233	0.95034	0.899						1654.99	1.00502	0.68262
1652.78	1.00235	0.94939	0.89705						1653.06	1.00505	0.6765
1650.85	1.00235	0.94852	0.89518						1651.13	1.00499	0.67077
1648.92	1.00234	0.94773	0.89345						1649.2	1.00491	0.66544
1646.99	1.00232	0.94703	0.89193						1647.27	1.0049	0.66063
1645.07	1.00229	0.94643	0.89069						1645.34	1.005	0.65635
1643.14	1.00225	0.94593	0.88961						1643.42	1.00505	0.65266
1641.21	1.0022	0.94555	0.88865						1641.49	1.00495	0.64971
1639.28	1.00214	0.94527	0.88792						1639.56	1.00482	0.64749
1637.35	1.00208	0.94513	0.88752						1637.63	1.00475	0.64603
1635.42	1.00201	0.94511	0.88737						1635.7	1.0046	0.64545
1633.49	1.00193	0.94523	0.88743						1633.77	1.00429	0.64579
1631.57	1.00186	0.94547	0.88785						1631.84	1.00394	0.64708
1629.64	1.0018	0.94582	0.88878						1629.91	1.00367	0.64931
1627.71	1.00173	0.94629	0.89009						1627.98	1.00346	0.65221
1625.78	1.00167	0.94687	0.89164						1626.06	1.00331	0.65582
1623.85	1.00162	0.94756	0.89354						1624.13	1.00329	0.66023
1621.92	1.00156	0.94834	0.89569						1622.2	1.00337	0.66529
1619.99	1.00151	0.94921	0.89779						1620.27	1.00329	0.67087
1618.07	1.00145	0.95015	0.89982						1618.34	1.00304	0.67692
1616.14	1.0014	0.95116	0.90192						1616.41	1.00274	0.68339
1614.21	1.00134	0.95223	0.90422						1614.48	1.00251	0.69017
1612.28	1.00128	0.95334	0.90678						1612.55	1.00244	0.69717
1610.35	1.00123	0.95447	0.90945						1610.62	1.00243	0.70427
1608.42	1.00117	0.95561	0.91197						1608.7	1.00229	0.71139
1606.49	1.00111	0.95676	0.91426						1606.77	1.00202	0.71846
1604.57	1.00106	0.9579	0.91615						1604.84	1.00171	0.72542
1602.64	1.00101	0.95903	0.91737						1602.91	1.00138	0.73225
1600.71	1.00095	0.96013	0.91763						1600.98	1.00106	0.73886
1598.78	1.0009	0.96119	0.91668						1599.05	1.00085	0.7452
1596.85	1.00087	0.9622	0.91453						1597.12	1.00078	0.75133
1594.92	1.00085	0.96315	0.91132						1595.19	1.00075	0.75723
1592.99	1.00084	0.96405	0.90723						1593.26	1.00079	0.76284
1591.07	1.00086	0.96488	0.90279						1591.34	1.00094	0.76826
1589.14	1.0009	0.96564	0.89842						1589.41	1.00112	0.77352
1587.21	1.00097	0.96633	0.89438						1587.48	1.00129	0.77851
1585.28	1.00106	0.96695	0.89091						1585.55	1.00144	0.78327
1583.35	1.00115	0.96752	0.88809						1583.62	1.00157	0.78783
1581.42	1.00126	0.96802	0.88596						1581.69	1.00166	0.79208
1579.49	1.00138	0.96847	0.88502						1579.76	1.00188	0.79615
1577.57	1.00151	0.96888	0.88531						1577.83	1.00231	0.80008
1575.64	1.00163	0.96924	0.88673						1575.9	1.00283	0.80386
1573.71	1.00177	0.96956	0.88924						1573.98	1.00335	0.8075
1571.78	1.0019	0.96985	0.89284						1572.05	1.00386	0.81099
1569.85	1.00205	0.9701	0.89749						1570.12	1.00432	0.81437
1567.92	1.00219	0.97033	0.90297						1568.19	1.00459	0.81763
1565.99	1.00234	0.97053	0.90905						1566.26	1.00463	0.82077
1564.07	1.00249	0.97072	0.91562						1564.33	1.00471	0.82375
1562.14	1.00263	0.97089	0.92269						1562.4	1.00516	0.82661
1560.21	1.00276	0.97107	0.92981						1560.47	1.00575	0.82939
1558.28	1.00287	0.97126	0.93632						1558.54	1.00626	0.83209
1556.35	1.00297	0.97146	0.94182						1556.62	1.00669	0.83466
1554.42	1.00305	0.97167	0.94617						1554.69	1.00713	0.83708
1552.49	1.00313	0.97187	0.94936						1552.76	1.00757	0.83938
1550.57	1.00319	0.97208	0.95154						1550.83	1.00789	0.84163
1548.64	1.00326	0.97229	0.9529						1548.9	1.00802	0.84378
1546.71	1.00333	0.97249	0.95368						1546.97	1.00804	0.84579
1544.78	1.0034	0.97269	0.95434						1545.04	1.00811	0.84768
1542.85	1.00347	0.97288	0.9551						1543.11	1.00823	0.8495
1540.92	1.00352	0.97309	0.9558						1541.18	1.00835	0.85121
1538.99	1.00355	0.97332	0.95643						1539.26	1.00848	0.85278
1537.07	1.00357	0.97355	0.95702						1537.33	1.00864	0.85418
1535.14	1.00359	0.97376	0.95762						1535.4	1.0088	0.85544
1533.21	1.00361	0.97396	0.95839						1533.47	1.00895	0.85669
1531.28	1.00363	0.97416	0.95896						1531.54	1.00895	0.85785
1529.35	1.00365	0.97435	0.95953						1529.61	1.00903	0.85888
1527.42	1.00368	0.97452	0.96023						1527.68	1.00916	0.85984
1525.49	1.00372	0.97468	0.96085						1525.75	1.00916	0.86076
1523.57	1.00376	0.97484	0.96127						1523.82	1.00892	0.86162
1521.64	1.0038	0.97501	0.96161						1521.9	1.00852	0.86241
1519.71	1.00384	0.9752	0.96223						1519.97	1.00826	0.86313
1517.78	1.00388	0.9754	0.9633						1518.04	1.00841	0.86381
1515.85	1.0039	0.97562	0.96453						1516.11	1.00873	0.86449
1513.92	1.00391	0.97587	0.96555						1514.18	1.00865	0.86518
1511.99	1.00392	0.97613	0.96635						1512.25	1.00832	0.86584
1510.07	1.00394	0.9764	0.96641						1510.32	1.00808	0.86646
1508.14	1.00397	0.9767	0.96489						1508.39	1.0079	0.8671
1506.21	1.00401	0.97703	0.96128						1506.46	1.00757	0.86776
1504.28	1.00404	0.97738	0.95558						1504.54	1.00709	0.86844
1502.35	1.00409	0.97773	0.9484						1502.61	1.00658	0.86911
1500.42	1.00414	0.9781	0.94045						1500.68	1.00608	0.86978
1498.49	1.00421	0.97848	0.93226						1498.75	1.00558	0.87044
1496.57	1.00429	0.9789	0.92433						1496.82	1.00514	0.8711
1494.64	1.00438	0.97933	0.91717						1494.89	1.00488	0.87174
1492.71	1.00449	0.97976	0.91109						1492.96	1.00477	0.87235
1490.78	1.00463	0.98018	0.90604						1491.03	1.0046	0.87293
1488.85	1.00481	0.98059	0.90193						1489.1	1.00429	0.87347
1486.92	1.005	0.981	0.89893						1487.18	1.00396	0.87395
1484.99	1.00521	0.98139	0.89739						1485.25	1.00379	0.87436
1483.07	1.00545	0.98175	0.89746						1483.32	1.00382	0.87472
1481.14	1.00571	0.98208	0.89886						1481.39	1.00368	0.87506
1479.21	1.00598	0.98239	0.90157						1479.46	1.0035	0.87533
1477.28	1.00624	0.98268	0.90579						1477.53	1.00349	0.87555
1475.35	1.00649	0.98293	0.91144						1475.6	1.00359	0.8757
1473.42	1.00671	0.98316	0.91826						1473.67	1.00378	0.8758
1471.49	1.00689	0.98335	0.92572						1471.74	1.00393	0.87585
1469.57	1.00701	0.98351	0.93337						1469.82	1.00397	0.87586
1467.64	1.00711	0.98362	0.94092						1467.89	1.004	0.87583
1465.71	1.00717	0.9837	0.94774						1465.96	1.00416	0.87576
1463.78	1.00717	0.98374	0.9528						1464.03	1.00439	0.87569
1461.85	1.00711	0.98375	0.95579						1462.1	1.00443	0.87562
1459.92	1.00699	0.98371	0.95711						1460.17	1.00424	0.87555
1457.99	1.0068	0.98363	0.95746						1458.24	1.00397	0.87549
1456.07	1.00656	0.98354	0.95748						1456.31	1.0037	0.87542
1454.14	1.00627	0.98343	0.9574						1454.38	1.00338	0.87535
1452.21	1.00596	0.9833	0.95738						1452.46	1.0031	0.87531
1450.28	1.00564	0.98316	0.95757						1450.53	1.00299	0.8753
1448.35	1.00532	0.98302	0.95802						1448.6	1.003	0.87531
1446.42	1.005	0.98286	0.95846						1446.67	1.00293	0.87534
1444.49	1.0047	0.9827	0.95867						1444.74	1.00271	0.87537
1442.57	1.00442	0.98254	0.95871						1442.81	1.0024	0.87538
1440.64	1.00417	0.98239	0.95885						1440.88	1.00215	0.87539
1438.71	1.00395	0.98224	0.95914						1438.95	1.00199	0.8754
1436.78	1.00377	0.9821	0.95938						1437.02	1.00186	0.8754
1434.85	1.00362	0.98199	0.95954						1435.1	1.00184	0.87536
1432.92	1.00352	0.98192	0.95974						1433.17	1.00206	0.87532
1430.99	1.00348	0.98188	0.95986						1431.24	1.00234	0.87526
1429.07	1.0035	0.98191	0.95969						1429.31	1.00247	0.87517
1427.14	1.00358	0.982	0.95928						1427.38	1.00249	0.87505
1425.21	1.00375	0.98216	0.9587						1425.45	1.00249	0.87491
1423.28	1.00402	0.9824	0.95799						1423.52	1.00244	0.87474
1421.35	1.00438	0.98273	0.95715						1421.59	1.00233	0.87456
1419.42	1.00484	0.98316	0.95629						1419.66	1.00216	0.87438
1417.49	1.0054	0.98371	0.9556						1417.74	1.00203	0.8742
1415.57	1.00604	0.98437	0.95522						1415.81	1.00197	0.87403
1413.64	1.0068	0.98515	0.95522						1413.88	1.00197	0.87387
1411.71	1.00766	0.98605	0.95559						1411.95	1.00201	0.87373
1409.78	1.00863	0.98706	0.95628						1410.02	1.00205	0.8736
1407.85	1.00971	0.98817	0.95728						1408.09	1.00212	0.87349
1405.92	1.01086	0.98934	0.95859						1406.16	1.0022	0.87343
1403.99	1.01208	0.99057	0.96012						1404.23	1.00221	0.87339
1402.07	1.01332	0.99183	0.96185						1402.3	1.00215	0.87339
1400.14	1.01454	0.99306	0.96377						1400.38	1.00204	0.87342
1398.21	1.01572	0.99426	0.96584						1398.45	1.00193	0.87346
1396.28	1.01681	0.99537	0.9681						1396.52	1.00191	0.87353
1394.35	1.01777	0.99637	0.97047						1394.59	1.00204	0.87363
1392.42	1.01857	0.99723	0.97269						1392.66	1.00221	0.87375
1390.49	1.0192	0.99791	0.97454						1390.73	1.00231	0.87387
1388.57	1.01964	0.99841	0.97596						1388.8	1.00231	0.87399
1386.64	1.01989	0.99871	0.97693						1386.87	1.0022	0.87412
1384.71	1.01993	0.9988	0.97751						1384.94	1.00206	0.87425
1382.78	1.01978	0.9987	0.97777						1383.02	1.00194	0.87439
1380.85	1.01942	0.99839	0.97766						1381.09	1.00186	0.87454
1378.92	1.01888	0.9979	0.9772						1379.16	1.00176	0.8747
1376.99	1.01817	0.99725	0.97644						1377.23	1.00163	0.87486
1375.07	1.01733	0.99647	0.97554						1375.3	1.00153	0.87504
1373.14	1.01638	0.99559	0.97464						1373.37	1.00151	0.87522
1371.21	1.01535	0.99464	0.97378						1371.44	1.00155	0.87541
1369.28	1.01429	0.99365	0.97293						1369.51	1.00158	0.8756
1367.35	1.01324	0.99266	0.97204						1367.58	1.00153	0.87579
1365.42	1.01223	0.99169	0.97109						1365.66	1.00139	0.87597
1363.5	1.01127	0.99076	0.97021						1363.73	1.00122	0.87615
1361.57	1.01037	0.9899	0.96951						1361.8	1.0011	0.87634
1359.64	1.00955	0.98911	0.96901						1359.87	1.00104	0.87653
1357.71	1.0088	0.98841	0.96865						1357.94	1.001	0.87672
1355.78	1.00814	0.98779	0.96839						1356.01	1.00097	0.8769
1353.85	1.00756	0.98725	0.96818						1354.08	1.00093	0.87709
1351.92	1.00706	0.98679	0.96794						1352.15	1.00093	0.87728
1350	1.00662	0.98639	0.96757						1350.22	1.00098	0.87748
1348.07	1.00624	0.98604	0.96686						1348.3	1.00103	0.8777
1346.14	1.00592	0.98573	0.9656						1346.37	1.00101	0.87791
1344.21	1.00565	0.98546	0.9637						1344.44	1.00091	0.8781
1342.28	1.0054	0.98521	0.96111						1342.51	1.00078	0.87829
1340.35	1.00518	0.98498	0.9579						1340.58	1.00069	0.87848
1338.42	1.00496	0.98477	0.95423						1338.65	1.0007	0.87868
1336.5	1.00474	0.98456	0.95018						1336.72	1.00076	0.87887
1334.57	1.00452	0.98434	0.94589						1334.79	1.00081	0.87906
1332.64	1.00429	0.98413	0.9416						1332.86	1.00083	0.87923
1330.71	1.00406	0.98392	0.93759						1330.93	1.00084	0.87939
1328.78	1.00383	0.9837	0.93402						1329.01	1.00084	0.87954
1326.85	1.0036	0.98349	0.9309						1327.08	1.00082	0.87967
1324.92	1.00338	0.98328	0.9282						1325.15	1.00077	0.87978
1323	1.00317	0.98308	0.9258						1323.22	1.00069	0.87986
1321.07	1.00297	0.98289	0.92357						1321.29	1.00057	0.87992
1319.14	1.00278	0.98271	0.92146						1319.36	1.00043	0.87997
1317.21	1.0026	0.98255	0.91952						1317.43	1.00034	0.87999
1315.28	1.00243	0.98241	0.91784						1315.5	1.00037	0.87999
1313.35	1.00227	0.98228	0.91639						1313.57	1.00044	0.87995
1311.42	1.00213	0.98217	0.91511						1311.65	1.00047	0.87988
1309.5	1.002	0.98208	0.91394						1309.72	1.00045	0.87977
1307.57	1.00189	0.982	0.91284						1307.79	1.00041	0.87966
1305.64	1.0018	0.98194	0.91177						1305.86	1.00035	0.87953
1303.71	1.00174	0.9819	0.91074						1303.93	1.00028	0.87939
1301.78	1.0017	0.98188	0.90981						1302	1.0002	0.87923
1299.85	1.0017	0.98189	0.90905						1300.07	1.00011	0.87906
1297.92	1.00173	0.98192	0.90853						1298.14	1.00002	0.87889
1296	1.00179	0.982	0.90837						1296.21	0.99995	0.87872
1294.07	1.00189	0.9821	0.90873						1294.29	0.99992	0.87856
1292.14	1.00204	0.98226	0.90975						1292.36	0.99992	0.87841
1290.21	1.00223	0.98246	0.91157						1290.43	0.99994	0.87827
1288.28	1.00248	0.98271	0.91432						1288.5	0.99998	0.87815
1286.35	1.0028	0.98302	0.918						1286.57	1.00002	0.87806
1284.42	1.00318	0.98338	0.92246						1284.64	1.00005	0.87798
1282.5	1.00362	0.98381	0.92742						1282.71	1.00008	0.8779
1280.57	1.00411	0.98428	0.93245						1280.78	1.00012	0.87782
1278.64	1.00467	0.98481	0.93705						1278.85	1.00016	0.87777
1276.71	1.00527	0.98539	0.94082						1276.93	1.00019	0.87773
1274.78	1.0059	0.986	0.94348						1275	1.00022	0.8777
1272.85	1.00657	0.98664	0.94485						1273.07	1.00023	0.87767
1270.92	1.00725	0.98729	0.94482						1271.14	1.00024	0.87763
1269	1.00792	0.98794	0.94331						1269.21	1.00024	0.87758
1267.07	1.00858	0.98858	0.94024						1267.28	1.00024	0.87754
1265.14	1.0092	0.98919	0.93555						1265.35	1.00024	0.8775
1263.21	1.00978	0.98976	0.92929						1263.42	1.00024	0.87747
1261.28	1.0103	0.99027	0.92159						1261.49	1.00025	0.87745
1259.35	1.01075	0.99071	0.91273						1259.57	1.00024	0.87743
1257.42	1.01112	0.99108	0.90299						1257.64	1.00023	0.87741
1255.5	1.0114	0.99135	0.8927						1255.71	1.00021	0.8774
1253.57	1.01158	0.99153	0.88221						1253.78	1.00019	0.87741
1251.64	1.01165	0.99161	0.87192						1251.85	1.00015	0.87744
1249.71	1.01162	0.99157	0.86226						1249.92	1.0001	0.87751
1247.78	1.01147	0.99143	0.85368						1247.99	1.00007	0.8776
1245.85	1.01123	0.99119	0.84658						1246.06	1.00006	0.87774
1243.92	1.0109	0.99088	0.84129						1244.13	1.00005	0.8779
1242	1.01049	0.99049	0.83803						1242.21	1.00004	0.87808
1240.07	1.01001	0.99003	0.8369						1240.28	1.00003	0.87828
1238.14	1.00947	0.98952	0.83791						1238.35	1.00001	0.87848
1236.21	1.00889	0.98896	0.84093						1236.42	1.00001	0.87868
1234.28	1.00827	0.98837	0.84573						1234.49	1.00003	0.87888
1232.35	1.00762	0.98776	0.85207						1232.56	1.00004	0.87909
1230.42	1.00697	0.98714	0.85969						1230.63	1.00004	0.8793
1228.5	1.00633	0.98653	0.86829						1228.7	1.00004	0.87948
1226.57	1.00571	0.98594	0.87749						1226.77	1.00004	0.87966
1224.64	1.00511	0.98537	0.88687						1224.85	1.00004	0.87984
1222.71	1.00454	0.98484	0.89605						1222.92	1.00004	0.87999
1220.78	1.00402	0.98436	0.90471						1220.99	1.00004	0.88013
1218.85	1.00355	0.98392	0.91262						1219.06	1.00002	0.88024
1216.92	1.00314	0.98354	0.91966						1217.13	0.99999	0.88032
1215	1.00279	0.98323	0.92573						1215.2	0.99997	0.8804
1213.07	1.0025	0.98297	0.93082						1213.27	0.99995	0.88046
1211.14	1.00229	0.98278	0.93496						1211.34	0.99994	0.88051
1209.21	1.00214	0.98265	0.93825						1209.41	0.99992	0.88055
1207.28	1.00207	0.9826	0.94086						1207.49	0.99991	0.8806
1205.35	1.00207	0.98261	0.94296						1205.56	0.9999	0.88065
1203.42	1.00214	0.98269	0.94472						1203.63	0.9999	0.8807
1201.5	1.00229	0.98286	0.94628						1201.7	0.99991	0.88073
1199.57	1.00252	0.98311	0.94768						1199.77	0.99992	0.88075
1197.64	1.00283	0.98344	0.94892						1197.84	0.99993	0.88076
1195.71	1.00322	0.98385	0.94997						1195.91	0.99994	0.88077
1193.78	1.00369	0.98433	0.95083						1193.98	0.99994	0.8808
1191.85	1.00422	0.98488	0.95143						1192.05	0.99995	0.88084
1189.92	1.00483	0.98551	0.95165						1190.13	0.99997	0.88087
1188	1.0055	0.98621	0.95134						1188.2	1.00001	0.88091
1186.07	1.00625	0.98697	0.95054						1186.27	1.00004	0.88095
1184.14	1.00706	0.98779	0.94952						1184.34	1.00006	0.881
1182.21	1.00791	0.98865	0.94859						1182.41	1.00008	0.88103
1180.28	1.00881	0.98956	0.94771						1180.48	1.00009	0.88106
1178.35	1.00974	0.99049	0.94646						1178.55	1.0001	0.88106
1176.42	1.01068	0.99144	0.9443						1176.62	1.00009	0.88105
1174.5	1.01161	0.99238	0.94076						1174.69	1.00008	0.88103
1172.57	1.01254	0.99331	0.93547						1172.77	1.00008	0.881
1170.64	1.01343	0.99421	0.92822						1170.84	1.00008	0.881
1168.71	1.01429	0.99507	0.91894						1168.91	1.00009	0.881
1166.78	1.01508	0.99586	0.90787						1166.98	1.0001	0.88101
1164.85	1.0158	0.99659	0.89557						1165.05	1.00009	0.88102
1162.92	1.01643	0.99722	0.88292						1163.12	1.00008	0.88102
1161	1.01697	0.99777	0.87085						1161.19	1.00009	0.88101
1159.07	1.01739	0.99821	0.86014						1159.26	1.0001	0.88097
1157.14	1.0177	0.99854	0.85131						1157.33	1.00012	0.88091
1155.21	1.0179	0.99876	0.84462						1155.41	1.00014	0.88083
1153.28	1.01797	0.99886	0.84018						1153.48	1.00014	0.88075
1151.35	1.01793	0.99885	0.83804						1151.55	1.00014	0.88066
1149.42	1.01776	0.99872	0.83819						1149.62	1.00013	0.88055
1147.5	1.01749	0.99849	0.84056						1147.69	1.00012	0.88041
1145.57	1.01713	0.99816	0.84501						1145.76	1.00012	0.88021
[truncated: 387 more rows]

## Sheet: Raw_Data_Figure_3
Sample	TiO2-NPs
Comments	TiO2-NPs
Filename	D:\AFTERJ~1\SCIENC~1\Chemistry\MUNAAB~1\14102021\TiO2-NPs.raw
Goniometer	Ultima IV (185mm)
Attachment	Standard Att.
ScanningMode	2Theta/Theta
ScanningType	Continuos Scanning
X-Ray	40kV/40mA
DivSlit	1deg.
DivH.L.Slit	10.00mm
SctSlit	1deg.
RecSlit	0.15mm
K-beta filter
Start	20
Stop	80
Step	0.02
Speed	3
2Theta	Intensity
20	195
20.02	230
20.04	220
20.06	190
20.08	187.5
20.1	210
20.12	210
20.14	180
20.16	157.5
20.18	245
20.2	155
20.22	202.5
20.24	200
20.26	177.5
20.28	197.5
20.3	255
20.32	210
20.34	230
20.36	215
20.38	152.5
20.4	217.5
20.42	180
20.44	202.5
20.46	177.5
20.48	172.5
20.5	190
20.52	192.5
20.54	177.5
20.56	195
20.58	215
20.6	202.5
20.62	220
20.64	165
20.66	172.5
20.68	227.5
20.7	167.5
20.72	172.5
20.74	207.5
20.76	225
20.78	182.5
20.8	177.5
20.82	185
20.84	170
20.86	202.5
20.88	207.5
20.9	237.5
20.92	137.5
20.94	210
20.96	200
20.98	220
21	235
21.02	210
21.04	197.5
21.06	170
21.08	180
21.1	205
21.12	202.5
21.14	170
21.16	180
21.18	232.5
21.2	227.5
21.22	175
21.24	165
21.26	247.5
21.28	217.5
21.3	222.5
21.32	162.5
21.34	210
21.36	182.5
21.38	197.5
21.4	210
21.42	210
21.44	197.5
21.46	232.5
21.48	197.5
21.5	180
21.52	190
21.54	220
21.56	167.5
21.58	182.5
21.6	245
21.62	190
21.64	180
21.66	227.5
21.68	240
21.7	235
21.72	217.5
21.74	200
21.76	222.5
21.78	252.5
21.8	210
21.82	182.5
21.84	205
21.86	200
21.88	227.5
21.9	200
21.92	195
21.94	202.5
21.96	190
21.98	202.5
22	177.5
22.02	197.5
22.04	222.5
22.06	217.5
22.08	212.5
22.1	212.5
22.12	217.5
22.14	167.5
22.16	202.5
22.18	217.5
22.2	175
22.22	192.5
22.24	187.5
22.26	242.5
22.28	210
22.3	245
22.32	190
22.34	207.5
22.36	200
22.38	212.5
22.4	227.5
22.42	170
22.44	230
22.46	215
22.48	225
22.5	230
22.52	222.5
22.54	165
22.56	217.5
22.58	200
22.6	225
22.62	185
22.64	210
22.66	220
22.68	265
22.7	230
22.72	232.5
22.74	227.5
22.76	212.5
22.78	237.5
22.8	225
22.82	255
22.84	252.5
22.86	230
22.88	252.5
22.9	230
22.92	227.5
22.94	250
22.96	270
22.98	262.5
23	282.5
23.02	225
23.04	270
23.06	257.5
23.08	247.5
23.1	245
23.12	240
23.14	232.5
23.16	212.5
23.18	235
23.2	277.5
23.22	277.5
23.24	250
23.26	245
23.28	265
23.3	230
23.32	240
23.34	247.5
23.36	252.5
23.38	272.5
23.4	265
23.42	215
23.44	255
23.46	275
23.48	197.5
23.5	245
23.52	265
23.54	270
23.56	265
23.58	245
23.6	245
23.62	232.5
23.64	235
23.66	225
23.68	260
23.7	282.5
23.72	252.5
23.74	227.5
23.76	247.5
23.78	260
23.8	317.5
23.82	277.5
23.84	310
23.86	262.5
23.88	295
23.9	275
23.92	300
23.94	300
23.96	257.5
23.98	322.5
24	295
24.02	297.5
24.04	292.5
24.06	352.5
24.08	347.5
24.1	292.5
24.12	317.5
24.14	317.5
24.16	315
24.18	335
24.2	375
24.22	332.5
24.24	297.5
24.26	282.5
24.28	372.5
24.3	335
24.32	322.5
24.34	352.5
24.36	390
24.38	372.5
24.4	365
24.42	375
24.44	470
24.46	437.5
24.48	377.5
24.5	425
24.52	532.5
24.54	450
24.56	492.5
24.58	492.5
24.6	535
24.62	587.5
24.64	557.5
24.66	570
24.68	612.5
24.7	755
24.72	792.5
24.74	722.5
24.76	752.5
24.78	807.5
24.8	792.5
24.82	835
24.84	965
24.86	945
24.88	980
24.9	1062.5
24.92	1092.5
24.94	1190
24.96	1207.5
24.98	1342.5
25	1355
25.02	1450
25.04	1457.5
25.06	1582.5
25.08	1635
25.1	1842.5
25.12	1837.5
25.14	1820
25.16	2055
25.18	2020
25.2	2152.5
25.22	2245
25.24	2310
25.26	2397.5
25.28	2600
25.3	2497.5
25.32	2625
25.34	2617.5
25.36	2902.5
25.38	2850
25.4	2900
25.42	2845
25.44	3040
25.46	2970
25.48	3055
25.5	3025
25.52	2952.5
25.54	3020
25.56	3182.5
25.58	3047.5
25.6	3245
25.62	3035
25.64	2977.5
25.66	3035
25.68	2725
25.7	2842.5
25.72	2715
25.74	2647.5
25.76	2567.5
25.78	2530
25.8	2352.5
25.82	2342.5
25.84	2325
25.86	2207.5
25.88	2052.5
25.9	1940
25.92	1867.5
25.94	1790
25.96	1825
25.98	1585
26	1495
26.02	1435
26.04	1405
26.06	1370
26.08	1245
26.1	1185
26.12	1117.5
26.14	1185
26.16	992.5
26.18	1042.5
26.2	935
26.22	825
26.24	877.5
26.26	875
26.28	742.5
26.3	742.5
26.32	747.5
26.34	740
26.36	647.5
26.38	632.5
26.4	615
26.42	637.5
26.44	612.5
26.46	582.5
26.48	540
26.5	490
26.52	520
26.54	552.5
26.56	445
26.58	485
26.6	495
26.62	415
26.64	445
26.66	460
26.68	375
26.7	390
26.72	420
26.74	402.5
26.76	395
26.78	395
26.8	390
26.82	355
26.84	360
26.86	355
26.88	355
26.9	330
26.92	332.5
26.94	312.5
26.96	322.5
26.98	360
27	317.5
27.02	355
27.04	375
27.06	312.5
27.08	355
27.1	342.5
27.12	287.5
27.14	327.5
27.16	290
27.18	295
27.2	252.5
27.22	292.5
27.24	295
27.26	275
27.28	290
27.3	300
27.32	270
27.34	260
27.36	260
27.38	310
27.4	290
27.42	302.5
27.44	260
27.46	297.5
27.48	285
27.5	260
27.52	267.5
27.54	285
27.56	290
27.58	312.5
27.6	232.5
27.62	267.5
27.64	270
27.66	297.5
27.68	295
27.7	267.5
27.72	275
27.74	305
27.76	252.5
27.78	292.5
27.8	282.5
27.82	277.5
27.84	235
27.86	237.5
27.88	212.5
27.9	285
27.92	237.5
27.94	282.5
27.96	260
27.98	245
28	282.5
28.02	187.5
28.04	210
28.06	275
28.08	245
28.1	227.5
28.12	252.5
28.14	247.5
28.16	260
28.18	217.5
28.2	215
28.22	250
28.24	232.5
28.26	200
28.28	202.5
28.3	237.5
28.32	265
28.34	257.5
28.36	177.5
28.38	267.5
28.4	205
28.42	260
28.44	277.5
28.46	222.5
28.48	242.5
28.5	220
28.52	197.5
28.54	262.5
28.56	190
28.58	180
28.6	267.5
28.62	220
28.64	202.5
28.66	225
28.68	202.5
28.7	212.5
28.72	227.5
28.74	147.5
28.76	215
28.78	180
28.8	210
28.82	240
28.84	210
28.86	207.5
28.88	215
28.9	192.5
28.92	175
28.94	242.5
28.96	232.5
28.98	197.5
29	187.5
29.02	222.5
29.04	237.5
29.06	215
29.08	222.5
29.1	180
29.12	262.5
29.14	212.5
29.16	210
29.18	180
29.2	220
29.22	200
29.24	227.5
29.26	230
29.28	232.5
29.3	230
29.32	210
29.34	215
29.36	192.5
29.38	245
29.4	187.5
29.42	162.5
29.44	192.5
29.46	215
29.48	207.5
29.5	225
29.52	215
29.54	195
29.56	252.5
29.58	212.5
29.6	205
29.62	205
29.64	197.5
29.66	172.5
29.68	180
29.7	190
29.72	222.5
29.74	225
29.76	175
29.78	207.5
29.8	222.5
29.82	200
29.84	255
29.86	195
29.88	232.5
29.9	197.5
29.92	180
29.94	220
29.96	165
29.98	257.5
30	227.5
30.02	207.5
30.04	197.5
30.06	242.5
30.08	180
30.1	170
30.12	222.5
30.14	167.5
30.16	242.5
30.18	197.5
30.2	220
30.22	230
30.24	220
30.26	255
30.28	165
30.3	207.5
30.32	225
30.34	240
30.36	215
30.38	225
30.4	250
30.42	210
30.44	227.5
30.46	215
30.48	202.5
30.5	185
30.52	225
30.54	275
30.56	225
30.58	245
30.6	220
30.62	267.5
30.64	222.5
30.66	245
30.68	195
30.7	232.5
30.72	252.5
30.74	280
30.76	225
30.78	312.5
30.8	242.5
30.82	230
30.84	267.5
30.86	267.5
30.88	280
30.9	257.5
30.92	282.5
30.94	252.5
30.96	257.5
30.98	222.5
31	250
31.02	280
31.04	282.5
31.06	290
31.08	247.5
31.1	255
31.12	237.5
31.14	240
31.16	277.5
31.18	270
31.2	247.5
31.22	235
31.24	240
31.26	310
31.28	225
31.3	215
31.32	267.5
31.34	220
31.36	262.5
31.38	227.5
31.4	270
31.42	215
31.44	235
31.46	212.5
31.48	242.5
31.5	222.5
31.52	185
31.54	222.5
31.56	190
31.58	205
31.6	207.5
31.62	210
31.64	235
31.66	212.5
31.68	215
31.7	175
31.72	197.5
31.74	150
31.76	222.5
31.78	207.5
31.8	150
31.82	160
31.84	172.5
31.86	205
31.88	185
31.9	207.5
31.92	155
31.94	202.5
31.96	190
31.98	195
32	205
32.02	180
32.04	187.5
32.06	190
32.08	185
32.1	175
32.12	220
32.14	207.5
32.16	195
32.18	182.5
32.2	190
32.22	152.5
32.24	195
32.26	172.5
32.28	167.5
32.3	147.5
32.32	182.5
32.34	175
32.36	172.5
32.38	195
32.4	185
32.42	180
32.44	185
32.46	225
32.48	180
32.5	172.5
32.52	160
32.54	195
32.56	187.5
32.58	227.5
32.6	195
32.62	160
32.64	197.5
32.66	175
32.68	135
32.7	165
32.72	197.5
32.74	180
32.76	182.5
32.78	225
32.8	190
32.82	180
32.84	157.5
32.86	170
32.88	185
32.9	187.5
32.92	222.5
32.94	170
32.96	172.5
32.98	220
33	170
33.02	142.5
33.04	172.5
33.06	200
33.08	172.5
33.1	167.5
33.12	215
33.14	165
33.16	207.5
33.18	217.5
33.2	150
33.22	180
33.24	200
33.26	167.5
33.28	122.5
33.3	212.5
33.32	167.5
33.34	180
33.36	157.5
33.38	132.5
33.4	162.5
33.42	195
33.44	185
33.46	150
33.48	145
33.5	152.5
33.52	200
33.54	190
33.56	187.5
33.58	162.5
33.6	157.5
33.62	162.5
33.64	172.5
33.66	177.5
33.68	185
33.7	152.5
33.72	145
33.74	145
33.76	150
33.78	200
33.8	117.5
33.82	170
33.84	237.5
33.86	162.5
33.88	192.5
33.9	182.5
33.92	185
33.94	172.5
33.96	152.5
33.98	182.5
34	180
34.02	205
34.04	145
34.06	172.5
34.08	207.5
34.1	157.5
34.12	162.5
34.14	185
34.16	240
34.18	162.5
34.2	180
34.22	210
34.24	185
34.26	187.5
34.28	182.5
34.3	177.5
34.32	185
34.34	167.5
34.36	150
34.38	187.5
34.4	185
34.42	175
34.44	190
34.46	160
34.48	150
34.5	195
34.52	190
34.54	152.5
34.56	140
34.58	142.5
34.6	155
34.62	180
34.64	187.5
34.66	142.5
34.68	187.5
34.7	157.5
34.72	172.5
34.74	137.5
34.76	172.5
34.78	177.5
34.8	137.5
34.82	197.5
34.84	150
34.86	130
34.88	197.5
34.9	187.5
34.92	175
34.94	170
34.96	192.5
34.98	195
35	187.5
35.02	162.5
35.04	137.5
35.06	192.5
35.08	177.5
35.1	150
35.12	145
35.14	160
35.16	232.5
35.18	162.5
35.2	215
35.22	197.5
35.24	160
35.26	177.5
35.28	157.5
35.3	185
35.32	177.5
35.34	177.5
35.36	207.5
35.38	207.5
35.4	162.5
35.42	162.5
35.44	190
35.46	170
35.48	155
35.5	172.5
35.52	165
35.54	172.5
35.56	230
35.58	172.5
35.6	175
35.62	212.5
35.64	165
35.66	175
35.68	180
35.7	207.5
35.72	167.5
35.74	180
35.76	182.5
35.78	192.5
35.8	250
35.82	192.5
35.84	160
35.86	200
35.88	220
35.9	190
35.92	187.5
35.94	227.5
35.96	207.5
35.98	190
36	197.5
36.02	217.5
36.04	212.5
36.06	217.5
36.08	212.5
36.1	235
36.12	200
36.14	205
36.16	217.5
36.18	252.5
36.2	257.5
36.22	185
36.24	235
36.26	240
36.28	237.5
36.3	247.5
36.32	225
36.34	240
36.36	247.5
36.38	220
36.4	210
36.42	252.5
36.44	255
36.46	245
36.48	205
36.5	275
36.52	235
36.54	255
36.56	245
36.58	257.5
36.6	225
36.62	270
36.64	232.5
36.66	260
36.68	265
36.7	260
36.72	255
36.74	255
36.76	297.5
36.78	310
36.8	327.5
36.82	310
36.84	325
36.86	285
36.88	302.5
36.9	297.5
36.92	342.5
36.94	315
36.96	330
36.98	325
37	380
37.02	337.5
37.04	312.5
37.06	355
37.08	380
37.1	385
37.12	360
37.14	425
37.16	362.5
37.18	335
37.2	437.5
37.22	370
37.24	442.5
37.26	392.5
37.28	415
37.3	395
37.32	412.5
37.34	390
37.36	412.5
37.38	392.5
37.4	427.5
37.42	425
37.44	460
37.46	442.5
37.48	445
37.5	422.5
37.52	500
37.54	480
37.56	440
37.58	595
37.6	560
37.62	460
37.64	530
37.66	587.5
37.68	555
37.7	575
37.72	617.5
37.74	605
37.76	715
37.78	675
37.8	622.5
37.82	575
37.84	672.5
37.86	655
37.88	700
37.9	720
37.92	697.5
37.94	740
37.96	655
37.98	750
38	707.5
38.02	742.5
38.04	710
38.06	805
38.08	770
38.1	730
38.12	717.5
38.14	727.5
38.16	735
38.18	692.5
38.2	667.5
38.22	755
38.24	725
38.26	622.5
38.28	707.5
38.3	707.5
38.32	687.5
38.34	655
38.36	660
38.38	640
38.4	640
38.42	550
38.44	645
38.46	605
38.48	565
38.5	542.5
38.52	627.5
38.54	575
38.56	522.5
38.58	470
38.6	560
38.62	500
38.64	502.5
38.66	472.5
38.68	460
38.7	420
38.72	477.5
38.74	430
38.76	422.5
38.78	470
38.8	445
38.82	435
38.84	447.5
38.86	420
38.88	435
38.9	395
38.92	327.5
38.94	357.5
38.96	410
38.98	372.5
39	365
39.02	372.5
39.04	360
39.06	370
39.08	302.5
39.1	307.5
39.12	345
39.14	317.5
39.16	320
39.18	305
39.2	365
39.22	305
39.24	282.5
39.26	312.5
39.28	290
39.3	297.5
39.32	247.5
39.34	297.5
39.36	295
39.38	215
39.4	270
39.42	255
39.44	260
39.46	247.5
39.48	255
39.5	240
39.52	247.5
39.54	237.5
39.56	182.5
39.58	207.5
39.6	187.5
39.62	215
39.64	250
39.66	192.5
39.68	202.5
39.7	205
39.72	220
39.74	167.5
39.76	207.5
39.78	187.5
39.8	217.5
39.82	262.5
39.84	210
39.86	185
39.88	170
39.9	175
39.92	202.5
39.94	182.5
39.96	220
39.98	187.5
40	180
40.02	175
40.04	170
40.06	182.5
40.08	227.5
40.1	167.5
40.12	175
40.14	225
40.16	145
40.18	185
40.2	177.5
40.22	192.5
40.24	195
40.26	175
40.28	165
40.3	195
40.32	187.5
40.34	182.5
40.36	177.5
40.38	162.5
40.4	222.5
40.42	187.5
40.44	187.5
40.46	162.5
40.48	167.5
40.5	165
40.52	210
40.54	160
40.56	182.5
40.58	155
40.6	185
40.62	147.5
40.64	182.5
40.66	127.5
40.68	150
40.7	180
40.72	160
40.74	147.5
40.76	140
40.78	147.5
40.8	147.5
40.82	145
40.84	180
40.86	155
40.88	150
40.9	177.5
40.92	150
40.94	130
40.96	135
40.98	135
41	177.5
41.02	167.5
41.04	182.5
41.06	167.5
41.08	140
41.1	182.5
41.12	162.5
41.14	140
41.16	155
41.18	162.5
41.2	152.5
41.22	120
41.24	147.5
41.26	150
41.28	145
41.3	135
41.32	160
41.34	135
41.36	177.5
41.38	130
41.4	147.5
41.42	160
41.44	155
41.46	137.5
41.48	135
41.5	157.5
41.52	132.5
41.54	150
41.56	145
41.58	132.5
41.6	187.5
41.62	150
41.64	175
41.66	162.5
41.68	195
41.7	140
41.72	157.5
41.74	132.5
41.76	160
41.78	172.5
41.8	165
41.82	155
41.84	155
41.86	115
41.88	170
41.9	152.5
41.92	180
41.94	135
41.96	130
41.98	152.5
42	145
42.02	155
42.04	147.5
42.06	135
42.08	202.5
42.1	132.5
42.12	110
42.14	155
42.16	112.5
42.18	132.5
42.2	125
42.22	140
42.24	135
42.26	160
42.28	177.5
42.3	167.5
42.32	197.5
42.34	152.5
42.36	190
42.38	150
42.4	180
42.42	155
42.44	130
42.46	197.5
42.48	132.5
42.5	135
42.52	140
42.54	170
42.56	155
42.58	152.5
42.6	180
42.62	170
42.64	167.5
42.66	177.5
42.68	185
42.7	152.5
42.72	150
42.74	175
42.76	190
42.78	172.5
42.8	167.5
42.82	162.5
42.84	160
42.86	165
42.88	162.5
42.9	155
42.92	117.5
42.94	150
42.96	127.5
42.98	167.5
43	127.5
43.02	115
43.04	175
43.06	190
43.08	155
43.1	102.5
43.12	152.5
43.14	175
43.16	142.5
43.18	155
43.2	155
43.22	157.5
43.24	142.5
43.26	170
43.28	145
43.3	140
43.32	127.5
43.34	180
43.36	167.5
43.38	132.5
43.4	142.5
43.42	150
43.44	145
43.46	147.5
43.48	112.5
43.5	162.5
43.52	147.5
43.54	172.5
43.56	142.5
43.58	122.5
43.6	115
43.62	165
43.64	160
43.66	162.5
43.68	155
43.7	170
43.72	150
43.74	175
43.76	147.5
43.78	150
43.8	147.5
43.82	145
43.84	147.5
43.86	157.5
43.88	140
43.9	132.5
43.92	152.5
43.94	120
43.96	165
43.98	87.5
44	125
44.02	137.5
44.04	125
44.06	125
44.08	110
44.1	155
44.12	132.5
44.14	137.5
44.16	172.5
44.18	157.5
44.2	150
44.22	127.5
44.24	142.5
44.26	127.5
44.28	117.5
44.3	152.5
44.32	155
44.34	120
44.36	167.5
44.38	137.5
44.4	137.5
44.42	160
44.44	140
44.46	145
44.48	172.5
44.5	167.5
44.52	135
44.54	152.5
44.56	135
44.58	137.5
44.6	145
44.62	180
44.64	137.5
44.66	132.5
44.68	157.5
44.7	135
44.72	112.5
44.74	135
44.76	142.5
44.78	165
44.8	120
44.82	152.5
44.84	160
44.86	127.5
44.88	172.5
44.9	172.5
44.92	122.5
44.94	122.5
44.96	152.5
44.98	135
45	140
45.02	152.5
45.04	170
45.06	150
45.08	165
45.1	140
45.12	137.5
45.14	157.5
45.16	140
45.18	167.5
45.2	182.5
45.22	147.5
45.24	85
45.26	137.5
45.28	125
45.3	142.5
45.32	150
45.34	140
45.36	132.5
45.38	160
45.4	157.5
45.42	140
45.44	132.5
45.46	145
45.48	162.5
45.5	162.5
45.52	140
45.54	160
45.56	135
45.58	130
45.6	145
45.62	152.5
45.64	132.5
45.66	170
45.68	127.5
45.7	152.5
45.72	167.5
45.74	162.5
45.76	137.5
45.78	152.5
45.8	147.5
45.82	190
45.84	162.5
45.86	177.5
45.88	207.5
45.9	160
45.92	152.5
45.94	150
45.96	162.5
45.98	142.5
46	127.5
46.02	175
46.04	177.5
46.06	167.5
46.08	182.5
46.1	170
46.12	190
46.14	162.5
46.16	177.5
46.18	172.5
46.2	182.5
46.22	152.5
46.24	145
46.26	170
46.28	145
46.3	145
46.32	200
46.34	195
46.36	172.5
46.38	160
46.4	162.5
46.42	155
46.44	165
46.46	180
46.48	215
46.5	200
46.52	182.5
46.54	182.5
46.56	180
46.58	185
46.6	212.5
46.62	197.5
46.64	185
46.66	177.5
46.68	207.5
46.7	170
46.72	180
46.74	192.5
46.76	182.5
46.78	142.5
46.8	202.5
46.82	222.5
46.84	220
46.86	207.5
46.88	200
46.9	170
46.92	197.5
46.94	185
46.96	210
46.98	190
47	205
47.02	172.5
47.04	255
47.06	180
47.08	190
47.1	215
47.12	255
47.14	222.5
47.16	247.5
47.18	267.5
47.2	252.5
47.22	275
47.24	247.5
47.26	265
47.28	247.5
47.3	232.5
47.32	255
47.34	307.5
47.36	290
47.38	310
47.4	295
47.42	315
47.44	332.5
47.46	302.5
47.48	370
47.5	337.5
47.52	357.5
47.54	362.5
47.56	407.5
47.58	415
47.6	412.5
47.62	385
47.64	452.5
47.66	440
47.68	482.5
47.7	460
47.72	485
47.74	542.5
47.76	557.5
47.78	512.5
47.8	550
47.82	605
47.84	587.5
47.86	577.5
47.88	660
47.9	737.5
47.92	690
47.94	700
47.96	722.5
47.98	715
48	727.5
48.02	797.5
48.04	745
48.06	795
48.08	820
48.1	857.5
48.12	762.5
48.14	820
48.16	895
48.18	850
48.2	912.5
48.22	885
48.24	817.5
48.26	847.5
48.28	792.5
48.3	857.5
48.32	852.5
48.34	827.5
48.36	840
48.38	820
48.4	775
48.42	757.5
48.44	747.5
48.46	790
48.48	752.5
48.5	692.5
48.52	655
48.54	660
48.56	715
48.58	705
48.6	667.5
48.62	547.5
48.64	635
48.66	627.5
48.68	570
48.7	515
48.72	540
48.74	512.5
48.76	467.5
48.78	415
48.8	475
48.82	462.5
48.84	412.5
48.86	450
48.88	425
48.9	400
48.92	402.5
48.94	357.5
48.96	350
48.98	372.5
49	312.5
49.02	267.5
49.04	370
49.06	287.5
49.08	262.5
49.1	317.5
49.12	337.5
49.14	270
49.16	262.5
49.18	260
49.2	300
49.22	245
49.24	247.5
49.26	267.5
49.28	285
49.3	207.5
49.32	265
49.34	232.5
49.36	222.5
49.38	235
49.4	230
49.42	247.5
49.44	257.5
49.46	215
49.48	202.5
49.5	210
49.52	227.5
49.54	222.5
49.56	210
49.58	232.5
49.6	202.5
49.62	202.5
49.64	215
49.66	222.5
49.68	185
49.7	215
49.72	217.5
49.74	237.5
49.76	182.5
49.78	225
49.8	182.5
49.82	185
49.84	175
49.86	177.5
49.88	142.5
49.9	172.5
49.92	185
49.94	180
49.96	185
49.98	145
50	185
50.02	177.5
50.04	150
50.06	175
50.08	200
50.1	167.5
50.12	172.5
50.14	175
50.16	142.5
50.18	132.5
50.2	192.5
50.22	147.5
50.24	192.5
50.26	180
50.28	195
50.3	157.5
50.32	197.5
50.34	167.5
50.36	152.5
50.38	175
50.4	170
50.42	147.5
50.44	147.5
50.46	175
50.48	172.5
50.5	170
50.52	182.5
50.54	177.5
50.56	155
50.58	152.5
50.6	147.5
50.62	142.5
50.64	150
50.66	135
50.68	165
50.7	185
50.72	160
50.74	140
50.76	167.5
50.78	140
50.8	167.5
50.82	142.5
50.84	140
50.86	147.5
50.88	140
50.9	130
50.92	160
50.94	130
50.96	152.5
50.98	140
51	150
51.02	150
51.04	137.5
51.06	150
51.08	172.5
51.1	182.5
51.12	162.5
51.14	157.5
51.16	102.5
51.18	135
51.2	140
51.22	125
51.24	162.5
51.26	160
51.28	135
51.3	117.5
51.32	155
51.34	157.5
51.36	175
51.38	147.5
51.4	155
51.42	152.5
51.44	150
51.46	127.5
51.48	182.5
51.5	110
51.52	145
51.54	197.5
51.56	137.5
51.58	155
51.6	140
51.62	155
51.64	95
51.66	202.5
51.68	130
51.7	147.5
51.72	137.5
51.74	145
51.76	187.5
51.78	202.5
51.8	155
51.82	170
51.84	152.5
51.86	160
51.88	195
51.9	142.5
51.92	142.5
51.94	175
51.96	132.5
51.98	165
52	170
52.02	132.5
52.04	137.5
52.06	150
52.08	137.5
52.1	155
52.12	165
52.14	142.5
52.16	147.5
52.18	187.5
52.2	147.5
52.22	167.5
52.24	162.5
52.26	160
52.28	192.5
52.3	167.5
52.32	130
52.34	150
52.36	167.5
52.38	142.5
52.4	170
52.42	147.5
52.44	152.5
52.46	147.5
52.48	175
52.5	160
52.52	177.5
52.54	167.5
52.56	130
52.58	182.5
52.6	155
52.62	152.5
52.64	152.5
52.66	165
52.68	200
52.7	142.5
52.72	175
52.74	140
52.76	152.5
52.78	172.5
52.8	170
52.82	167.5
52.84	192.5
52.86	150
52.88	155
52.9	177.5
52.92	192.5
52.94	195
52.96	145
52.98	147.5
53	207.5
53.02	177.5
53.04	190
53.06	190
53.08	157.5
53.1	210
53.12	177.5
53.14	165
53.16	197.5
53.18	190
53.2	192.5
53.22	205
53.24	197.5
53.26	230
53.28	225
53.3	220
53.32	220
53.34	295
53.36	257.5
53.38	260
53.4	227.5
53.42	255
53.44	265
53.46	312.5
53.48	255
53.5	270
53.52	265
53.54	277.5
53.56	300
53.58	292.5
53.6	367.5
53.62	347.5
53.64	390
53.66	350
53.68	365
53.7	410
53.72	377.5
53.74	462.5
53.76	435
53.78	435
53.8	485
53.82	440
53.84	445
53.86	467.5
53.88	462.5
53.9	532.5
53.92	535
53.94	537.5
53.96	577.5
53.98	482.5
54	570
54.02	602.5
54.04	550
54.06	565
54.08	662.5
54.1	540
54.12	577.5
54.14	667.5
54.16	632.5
54.18	642.5
54.2	565
54.22	565
54.24	650
54.26	570
54.28	665
54.3	605
54.32	662.5
54.34	660
54.36	642.5
54.38	560
54.4	565
54.42	627.5
54.44	650
54.46	650
54.48	640
54.5	565
54.52	557.5
54.54	627.5
54.56	620
54.58	685
54.6	555
54.62	522.5
54.64	590
54.66	540
54.68	557.5
54.7	595
54.72	505
54.74	620
54.76	567.5
54.78	607.5
54.8	555
54.82	547.5
54.84	617.5
54.86	602.5
54.88	547.5
54.9	590
54.92	502.5
54.94	610
54.96	612.5
54.98	595
55	627.5
55.02	602.5
55.04	580
55.06	660
55.08	642.5
55.1	597.5
55.12	597.5
55.14	632.5
55.16	607.5
55.18	625
55.2	630
55.22	692.5
55.24	655
55.26	592.5
55.28	620
55.3	672.5
55.32	612.5
55.34	617.5
55.36	595
55.38	545
55.4	527.5
55.42	615
55.44	560
55.46	647.5
55.48	567.5
55.5	590
55.52	492.5
55.54	545
55.56	462.5
55.58	540
55.6	430
55.62	467.5
55.64	485
55.66	425
55.68	405
55.7	422.5
55.72	450
55.74	430
55.76	455
55.78	372.5
55.8	415
55.82	430
55.84	405
55.86	370
55.88	335
55.9	317.5
55.92	345
55.94	320
55.96	352.5
55.98	345
56	320
56.02	315
56.04	280
56.06	290
56.08	257.5
56.1	287.5
56.12	282.5
56.14	322.5
56.16	242.5
56.18	255
56.2	217.5
56.22	230
56.24	260
56.26	252.5
56.28	222.5
56.3	237.5
56.32	237.5
56.34	252.5
56.36	250
56.38	250
56.4	200
56.42	217.5
56.44	180
56.46	175
56.48	160
56.5	185
56.52	162.5
56.54	192.5
56.56	222.5
56.58	207.5
56.6	190
56.62	157.5
56.64	220
56.66	202.5
56.68	167.5
56.7	190
56.72	167.5
56.74	187.5
56.76	137.5
56.78	205
56.8	177.5
56.82	182.5
56.84	187.5
56.86	215
56.88	135
56.9	152.5
56.92	172.5
56.94	180
56.96	197.5
56.98	160
57	157.5
57.02	197.5
57.04	152.5
57.06	170
57.08	155
57.1	190
57.12	185
57.14	137.5
57.16	185
57.18	205
57.2	175
57.22	137.5
57.24	142.5
57.26	150
57.28	187.5
57.3	165
57.32	165
57.34	147.5
57.36	162.5
57.38	152.5
57.4	157.5
57.42	155
57.44	120
57.46	202.5
57.48	172.5
57.5	150
57.52	142.5
57.54	210
57.56	160
57.58	180
57.6	155
57.62	140
57.64	167.5
57.66	127.5
57.68	137.5
57.7	177.5
57.72	142.5
57.74	157.5
57.76	132.5
57.78	152.5
57.8	172.5
57.82	160
57.84	137.5
57.86	155
57.88	140
57.9	132.5
57.92	175
57.94	152.5
57.96	122.5
57.98	117.5
58	172.5
58.02	115
58.04	130
58.06	102.5
58.08	122.5
58.1	125
58.12	162.5
58.14	115
58.16	120
58.18	145
58.2	120
58.22	127.5
58.24	137.5
58.26	152.5
58.28	162.5
58.3	147.5
58.32	130
58.34	135
58.36	160
58.38	112.5
58.4	122.5
58.42	142.5
58.44	130
58.46	145
58.48	160
58.5	117.5
58.52	137.5
58.54	97.5
58.56	147.5
58.58	110
58.6	145
58.62	130
58.64	137.5
58.66	132.5
58.68	167.5
58.7	120
58.72	137.5
58.74	157.5
58.76	142.5
58.78	120
58.8	127.5
58.82	142.5
58.84	125
58.86	100
58.88	152.5
58.9	112.5
58.92	130
58.94	137.5
58.96	147.5
58.98	152.5
59	132.5
59.02	132.5
59.04	167.5
59.06	150
59.08	167.5
59.1	125
59.12	165
59.14	142.5
59.16	137.5
59.18	117.5
59.2	157.5
59.22	135
59.24	152.5
59.26	137.5
59.28	115
59.3	122.5
59.32	152.5
59.34	115
59.36	135
59.38	115
59.4	82.5
59.42	117.5
59.44	120
59.46	130
59.48	107.5
59.5	155
59.52	142.5
59.54	140
59.56	142.5
59.58	150
59.6	130
59.62	140
[truncated: 1,019 more rows]

## Sheet: Raw_Data_Figure_4_a_b
Raw_Data_Figure_4_a				Raw_Data_Figure_4_b
Mid-Z				Mid-Z	TFC Intensity	TFN Intensity
keV	cps/µA			-0.02	cps/µA	cps/µA
-0.02	0			0.004	0	0
0.004	0			0.029	0	0
0.029	0.00032			0.053	0.00019	0.0001
0.053	0.00053			0.078	0.00029	0.00019
0.078	0.00047			0.102	0.00019	0.00019
0.102	0.00027			0.127	5e-05	0.00011
0.127	9e-05			0.151	0	2e-05
0.151	0			0.175	0	0
0.175	0			0.2	0	0
0.2	0			0.224	1e-05	0
0.224	0			0.249	6e-05	0
0.249	0			0.273	0.00019	7e-05
0.273	0.00011			0.297	0.00041	0.00048
0.297	0.00081			0.322	0.00078	0.00106
0.322	0.00266			0.346	0.00148	0.00179
0.346	0.00593			0.371	0.00311	0.00354
0.371	0.01076			0.395	0.00637	0.00753
0.395	0.01731			0.42	0.01152	0.01407
0.42	0.02572			0.444	0.01795	0.02184
0.444	0.03602			0.468	0.02489	0.02955
0.468	0.0482			0.493	0.03189	0.03715
0.493	0.06148			0.517	0.039	0.04546
0.517	0.07429			0.542	0.04675	0.05448
0.542	0.0857			0.566	0.05624	0.06369
0.566	0.09646			0.591	0.06695	0.0725
0.591	0.10664			0.615	0.07531	0.0798
0.615	0.11379			0.639	0.0772	0.08373
0.639	0.11545			0.664	0.07359	0.08373
0.664	0.11292			0.688	0.06967	0.08187
0.688	0.10956			0.713	0.06911	0.08104
0.713	0.1068			0.737	0.07038	0.08192
0.737	0.10398			0.761	0.07075	0.0825
0.761	0.10152			0.786	0.06954	0.08051
0.786	0.10127			0.81	0.068	0.07638
0.81	0.10393			0.835	0.06651	0.07318
0.835	0.10737			0.859	0.06467	0.07308
0.859	0.10825			0.884	0.06249	0.07488
0.884	0.10536			0.908	0.0616	0.07609
0.908	0.10127			0.932	0.0635	0.07589
0.932	0.09915			0.957	0.06757	0.07516
0.957	0.09928			0.981	0.07085	0.07493
0.981	0.0994			1.006	0.07107	0.0756
1.006	0.09873			1.03	0.0686	0.07672
1.03	0.09794			1.055	0.06591	0.07704
1.055	0.09753			1.079	0.065	0.07603
1.079	0.09658			1.103	0.06617	0.07406
1.103	0.0948			1.128	0.06837	0.07183
1.128	0.09273			1.152	0.07062	0.0695
1.152	0.09173			1.177	0.07186	0.06752
1.177	0.0921			1.201	0.07115	0.06662
1.201	0.09303			1.225	0.06833	0.06727
1.225	0.09342			1.25	0.06505	0.06851
1.25	0.09367			1.274	0.06314	0.06842
1.274	0.09447			1.299	0.06278	0.06633
1.299	0.09513			1.323	0.06278	0.06421
1.323	0.09441			1.348	0.06259	0.06422
1.348	0.09286			1.372	0.06237	0.0662
1.372	0.09292			1.396	0.06216	0.06856
1.396	0.09552			1.421	0.06192	0.07065
1.421	0.09871			1.445	0.06159	0.07229
1.445	0.09965			1.47	0.06081	0.07277
1.47	0.0982			1.494	0.05908	0.07101
1.494	0.09585			1.519	0.05721	0.06722
1.519	0.09292			1.543	0.05643	0.06263
1.543	0.08853			1.567	0.0567	0.05915
1.567	0.0835			1.592	0.05621	0.0578
1.592	0.08008			1.616	0.05394	0.05846
1.616	0.07844			1.641	0.05102	0.05935
1.641	0.07651			1.665	0.04936	0.05885
1.665	0.07376			1.689	0.04902	0.05642
1.689	0.07243			1.714	0.04862	0.05315
1.714	0.07354			1.738	0.04735	0.0503
1.738	0.07525			1.763	0.04561	0.04884
1.763	0.0754			1.787	0.0438	0.04908
1.787	0.07423			1.812	0.04212	0.05059
1.812	0.07279			1.836	0.0411	0.05181
1.836	0.07138			1.86	0.04071	0.0512
1.86	0.06994			1.885	0.03995	0.0488
1.885	0.06867			1.909	0.03825	0.04647
1.909	0.06769			1.934	0.03678	0.0461
1.934	0.06665			1.958	0.03677	0.04744
1.958	0.06562			1.983	0.03782	0.04816
1.983	0.06524			2.007	0.03842	0.04634
2.007	0.06586			2.031	0.03799	0.04261
2.031	0.06614			2.056	0.03686	0.03938
2.056	0.06443			2.08	0.03551	0.03804
2.08	0.06122			2.105	0.03445	0.03831
2.105	0.05891			2.129	0.0342	0.03946
2.129	0.05834			2.153	0.03515	0.04212
2.153	0.05792			2.178	0.03922	0.04809
2.178	0.05641			2.202	0.05285	0.06135
2.202	0.05478			2.227	0.08514	0.0883
2.227	0.05423			2.251	0.14031	0.13511
2.251	0.05441			2.276	0.21073	0.19877
2.276	0.05417			2.3	0.27773	0.26207
2.3	0.05319			2.324	0.31843	0.29967
2.324	0.05204			2.349	0.31637	0.29505
2.349	0.05153			2.373	0.27084	0.25093
2.373	0.05189			2.398	0.19952	0.18696
2.398	0.05227			2.422	0.12919	0.12575
2.422	0.05121			2.447	0.08011	0.0817
2.447	0.04831			2.471	0.05564	0.05651
2.471	0.04503			2.495	0.04582	0.04404
2.495	0.0432			2.52	0.0396	0.03693
2.52	0.04338			2.544	0.03295	0.03172
2.544	0.04517			2.569	0.02734	0.0283
2.569	0.0487			2.593	0.02441	0.02713
2.593	0.05496			2.617	0.02372	0.02744
2.617	0.06696			2.642	0.02351	0.02764
2.642	0.09087			2.666	0.02204	0.02669
2.666	0.13429			2.691	0.01878	0.02449
2.691	0.19905			2.715	0.01515	0.02192
2.715	0.27433			2.74	0.01323	0.01973
2.74	0.33732			2.764	0.01344	0.01803
2.764	0.364			2.788	0.01404	0.0164
2.788	0.34259			2.813	0.01383	0.01498
2.813	0.28119			2.837	0.01366	0.01453
2.837	0.20364			2.862	0.01489	0.01576
2.862	0.13634			2.886	0.0175	0.01857
2.886	0.09427			2.911	0.02129	0.02191
2.911	0.07615			2.935	0.0264	0.02461
2.935	0.0712			2.959	0.03178	0.02597
2.959	0.06896			2.984	0.03413	0.02598
2.984	0.06458			3.008	0.03112	0.02467
3.008	0.05815			3.033	0.02421	0.02211
3.033	0.05223			3.057	0.01755	0.0185
3.057	0.0491			3.081	0.01361	0.01479
3.081	0.04996			3.106	0.01185	0.01215
3.106	0.05523			3.13	0.01062	0.01114
3.13	0.06459			3.155	0.00956	0.01108
3.155	0.07571			3.179	0.00932	0.01114
3.179	0.08451			3.204	0.00998	0.01111
3.204	0.08826			3.228	0.01061	0.01125
3.228	0.08795			3.252	0.0103	0.0115
3.252	0.08644			3.277	0.00925	0.01169
3.277	0.08451			3.301	0.00841	0.01161
3.301	0.08081			3.326	0.00839	0.01106
3.326	0.07487			3.35	0.00878	0.01
3.35	0.06813			3.375	0.00878	0.00879
3.375	0.06136			3.399	0.00817	0.00785
3.399	0.054			3.423	0.00752	0.00739
3.423	0.04617			3.448	0.00737	0.00745
3.448	0.03965			3.472	0.00768	0.00791
3.472	0.03616			3.497	0.00797	0.00821
3.497	0.03596			3.521	0.00796	0.00786
3.521	0.03859			3.545	0.00774	0.00706
3.545	0.04394			3.57	0.00754	0.00655
3.57	0.05252			3.594	0.00742	0.00675
3.594	0.06425			3.619	0.00753	0.0073
3.619	0.0776			3.643	0.00801	0.00762
3.643	0.0899			3.668	0.0086	0.00766
3.668	0.09913			3.692	0.00884	0.00802
3.692	0.10417			3.716	0.00868	0.00912
3.716	0.10341			3.741	0.00839	0.01031
3.741	0.09512			3.765	0.00815	0.01046
3.765	0.08107			3.79	0.00796	0.00911
3.79	0.06765			3.814	0.00773	0.0072
3.814	0.06091			3.839	0.00724	0.00605
3.839	0.06099			3.863	0.00638	0.0061
3.863	0.06319			3.887	0.00548	0.00654
3.887	0.06357			3.912	0.00518	0.00663
3.912	0.06203			3.936	0.00558	0.00644
3.936	0.06096			3.961	0.00633	0.00646
3.961	0.06172			3.985	0.00702	0.00665
3.985	0.06312			4.009	0.00743	0.00672
4.009	0.0626			4.034	0.00729	0.00673
4.034	0.05941			4.058	0.00666	0.00701
4.058	0.05488			4.083	0.00614	0.0074
4.083	0.05115			4.107	0.00628	0.00737
4.107	0.04951			4.132	0.00676	0.00679
4.132	0.05142			4.156	0.00681	0.00626
4.156	0.05924			4.18	0.00608	0.00631
4.18	0.07618			4.205	0.00516	0.00666
4.205	0.10357			4.229	0.00479	0.00669
4.229	0.14036			4.254	0.00496	0.00618
4.254	0.18456			4.278	0.00519	0.00558
4.278	0.24522			4.303	0.00521	0.00544
4.303	0.37808			4.327	0.0052	0.00613
4.327	0.76823			4.351	0.00524	0.00802
4.351	1.83828			4.376	0.00535	0.01227
4.376	4.29471			4.4	0.00594	0.02127
4.4	8.94308			4.425	0.00755	0.0388
4.425	16.1758			4.449	0.00989	0.06803
4.449	25.3119			4.473	0.01174	0.10733
4.473	34.3256			4.498	0.01209	0.14718
4.498	40.4418			4.522	0.01117	0.17359
4.522	41.4689			4.547	0.01014	0.17677
4.547	37.021			4.571	0.00973	0.15706
4.571	28.735			4.596	0.00968	0.12312
4.596	19.3221			4.62	0.00934	0.08556
4.62	11.1865			4.644	0.00863	0.05267
4.644	5.52946			4.669	0.00778	0.0289
4.669	2.3276			4.693	0.00703	0.01519
4.693	0.87647			4.718	0.00655	0.00952
4.718	0.38911			4.742	0.00672	0.00846
4.742	0.32804			4.767	0.00774	0.00896
4.767	0.47148			4.791	0.00944	0.01
4.791	0.81875			4.815	0.01127	0.01212
4.815	1.46078			4.84	0.01266	0.01556
4.84	2.45456			4.864	0.01304	0.01958
4.864	3.73472			4.889	0.01251	0.02337
4.889	5.06458			4.913	0.01168	0.02673
4.913	6.08349			4.937	0.01107	0.02916
4.937	6.44898			4.962	0.01035	0.02975
4.962	6.01836			4.986	0.00918	0.02784
4.986	4.93022			5.011	0.00793	0.0239
5.011	3.53298			5.035	0.00731	0.01887
5.035	2.2025			5.06	0.00729	0.01371
5.06	1.18551			5.084	0.00726	0.00938
5.084	0.54586			5.108	0.00692	0.00688
5.108	0.2153			5.133	0.0068	0.00659
5.133	0.07692			5.157	0.00736	0.00767
5.157	0.03108			5.182	0.00832	0.00872
5.182	0.01893			5.206	0.00877	0.0089
5.206	0.01625			5.231	0.00832	0.00845
5.231	0.01589			5.255	0.00736	0.00799
5.255	0.01615			5.279	0.00682	0.00786
5.279	0.01659			5.304	0.0072	0.00802
5.304	0.01729			5.328	0.00819	0.00833
5.328	0.01822			5.353	0.00898	0.00863
5.353	0.01893			5.377	0.00932	0.0089
5.377	0.0192			5.401	0.00959	0.00941
5.401	0.01924			5.426	0.01003	0.01013
5.426	0.01901			5.45	0.01031	0.01037
5.45	0.01785			5.475	0.01008	0.00961
5.475	0.01554			5.499	0.00941	0.0083
5.499	0.01315			5.524	0.0085	0.00733
5.524	0.01189			5.548	0.0075	0.00696
5.548	0.0117			5.572	0.00654	0.00682
5.572	0.01155			5.597	0.00583	0.00662
5.597	0.0109			5.621	0.00539	0.00632
5.621	0.01007			5.646	0.00517	0.006
5.646	0.00971			5.67	0.00519	0.00581
5.67	0.01017			5.695	0.00537	0.00588
5.695	0.01123			5.719	0.00549	0.00617
5.719	0.01233			5.743	0.00549	0.0065
5.743	0.01293			5.768	0.00577	0.00668
5.768	0.01292			5.792	0.00654	0.00661
5.792	0.01251			5.817	0.00758	0.00663
5.817	0.01224			5.841	0.00836	0.00716
5.841	0.01252			5.865	0.00861	0.008
5.865	0.01301			5.89	0.00832	0.00852
5.89	0.01288			5.914	0.00784	0.00855
5.914	0.01212			5.939	0.00751	0.0084
5.939	0.01153			5.963	0.00736	0.008
5.963	0.01152			5.988	0.00691	0.00708
5.988	0.01171			6.012	0.00599	0.00605
6.012	0.01188			6.036	0.00494	0.00573
6.036	0.01223			6.061	0.00434	0.00617
6.061	0.01266			6.085	0.00455	0.00648
6.085	0.0127			6.11	0.00547	0.00613
6.11	0.0121			6.134	0.00647	0.00576
6.134	0.01124			6.159	0.00674	0.00622
6.159	0.0106			6.183	0.00652	0.00762
6.183	0.01055			6.207	0.00718	0.00936
6.207	0.01145			6.232	0.00995	0.01149
6.232	0.01368			6.256	0.01532	0.01541
6.256	0.01704			6.281	0.02447	0.02347
6.281	0.02123			6.305	0.03909	0.03703
6.305	0.02642			6.329	0.05926	0.05616
6.329	0.03283			6.354	0.0826	0.07962
6.354	0.03932			6.378	0.10601	0.10467
6.378	0.04396			6.403	0.12594	0.12544
6.403	0.04561			6.427	0.13664	0.13577
6.427	0.0441			6.452	0.13247	0.13223
6.452	0.03941			6.476	0.11354	0.11582
6.476	0.0323			6.5	0.08701	0.09047
6.5	0.02475			6.525	0.06084	0.06272
6.525	0.01852			6.549	0.03906	0.03901
6.549	0.01388			6.574	0.02262	0.02258
6.574	0.01054			6.598	0.01187	0.01262
6.598	0.00884			6.622	0.00641	0.00719
6.622	0.00877			6.647	0.00457	0.00493
6.647	0.00922			6.671	0.00448	0.0048
6.671	0.00907			6.696	0.00517	0.0059
6.696	0.00837			6.72	0.00628	0.00778
6.72	0.00786			6.745	0.00741	0.00985
6.745	0.00796			6.769	0.00846	0.01182
6.769	0.00863			6.793	0.01025	0.01481
6.793	0.00964			6.818	0.01426	0.02219
6.818	0.01056			6.842	0.02122	0.0369
6.842	0.01096			6.867	0.03018	0.05863
6.867	0.0108			6.891	0.03895	0.08275
6.891	0.0106			6.916	0.04583	0.10397
6.916	0.01096			6.94	0.05092	0.11893
6.94	0.01203			6.964	0.05573	0.12673
6.964	0.0133			6.989	0.06087	0.12637
6.989	0.01413			7.013	0.06481	0.11769
7.013	0.0144			7.038	0.06514	0.10306
7.038	0.01472			7.062	0.06108	0.08686
7.062	0.01548			7.086	0.05408	0.07137
7.086	0.01627			7.111	0.04613	0.05636
7.111	0.01619			7.135	0.03804	0.04194
7.135	0.01503			7.16	0.02966	0.02997
7.16	0.0135			7.184	0.0214	0.0217
7.184	0.01262			7.209	0.01469	0.01634
7.209	0.01271			7.233	0.01061	0.01237
7.233	0.01346			7.257	0.00871	0.0096
7.257	0.01433			7.282	0.00784	0.00887
7.282	0.01529			7.306	0.00808	0.01078
7.306	0.01731			7.331	0.01129	0.01488
7.331	0.02263			7.355	0.01956	0.02129
7.355	0.034			7.38	0.03299	0.03194
7.38	0.05241			7.404	0.04962	0.04951
7.404	0.07528			7.428	0.06672	0.07315
7.428	0.09726			7.453	0.0824	0.09702
7.453	0.1134			7.477	0.09492	0.11353
7.477	0.12094			7.502	0.10231	0.11911
7.502	0.11844			7.526	0.10161	0.11509
7.526	0.10542			7.55	0.09125	0.10439
7.55	0.08414			7.575	0.0731	0.08851
7.575	0.06053			7.599	0.05284	0.06943
7.599	0.0406			7.624	0.03572	0.0509
7.624	0.02688			7.648	0.02402	0.03666
7.648	0.01851			7.673	0.01703	0.0274
7.673	0.01399			7.697	0.01319	0.02155
7.697	0.01206			7.721	0.01071	0.01758
7.721	0.01136			7.746	0.00848	0.01481
7.746	0.01095			7.77	0.00637	0.01253
7.77	0.01066			7.795	0.00509	0.01014
7.795	0.0106			7.819	0.00487	0.00776
7.819	0.01078			7.844	0.00532	0.00618
7.844	0.01148			7.868	0.00594	0.00599
7.868	0.01282			7.892	0.00683	0.00723
7.892	0.01452			7.917	0.00845	0.0096
7.917	0.01666			7.941	0.01121	0.01274
7.941	0.02042			7.966	0.01493	0.01647
7.966	0.02642			7.99	0.01912	0.02091
7.99	0.03321			8.014	0.02329	0.02596
8.014	0.03822			8.039	0.02693	0.03081
8.039	0.04001			8.063	0.02905	0.03402
8.063	0.03886			8.088	0.02866	0.03443
8.088	0.03606			8.112	0.0257	0.03189
8.112	0.03305			8.137	0.02143	0.02748
8.137	0.03059			8.161	0.01764	0.02318
8.161	0.02852			8.185	0.01581	0.02079
8.185	0.02666			8.21	0.01648	0.02089
8.21	0.02554			8.234	0.01881	0.02268
8.234	0.02555			8.259	0.02113	0.02478
8.259	0.02591			8.283	0.02213	0.02583
8.283	0.02551			8.308	0.02148	0.02505
8.308	0.02405			8.332	0.01959	0.02246
8.332	0.02197			8.356	0.01713	0.01904
8.356	0.01952			8.381	0.01452	0.01604
8.381	0.01681			8.405	0.01181	0.01419
8.405	0.01424			8.43	0.00958	0.0136
8.43	0.01241			8.454	0.00945	0.01476
8.454	0.01198			8.478	0.01338	0.01899
8.478	0.01361			8.503	0.02253	0.02878
8.503	0.01777			8.527	0.03773	0.04731
8.527	0.02441			8.552	0.05973	0.07668
8.552	0.03316			8.576	0.08782	0.11487
8.576	0.04306			8.601	0.11779	0.15518
8.601	0.05206			8.625	0.14254	0.18888
8.625	0.05753			8.649	0.15539	0.20844
8.649	0.05789			8.674	0.15397	0.20956
8.674	0.05328			8.698	0.14035	0.19247
8.698	0.04519			8.723	0.11862	0.16191
8.723	0.03583			8.747	0.09248	0.12468
8.747	0.02737			8.772	0.06569	0.08724
8.772	0.02132			8.796	0.04225	0.05491
8.796	0.01899			8.82	0.02532	0.03156
8.82	0.0221			8.845	0.01543	0.01816
8.845	0.03144			8.869	0.01091	0.01248
8.869	0.04569			8.894	0.00923	0.01091
8.894	0.06341			8.918	0.00859	0.01068
8.918	0.08574			8.942	0.00812	0.01053
8.942	0.11443			8.967	0.00763	0.01009
8.967	0.14716			8.991	0.00697	0.00934
8.991	0.17611			9.016	0.00608	0.00828
9.016	0.19226			9.04	0.00511	0.00706
9.04	0.1909			9.065	0.0044	0.00596
9.065	0.17392			9.089	0.00407	0.00521
9.089	0.14662			9.113	0.00404	0.00466
9.113	0.11425			9.138	0.00421	0.00419
9.138	0.08132			9.162	0.00459	0.00407
9.162	0.05322			9.187	0.00502	0.00463
9.187	0.03397			9.211	0.00529	0.00576
9.211	0.02351			9.236	0.00536	0.00687
9.236	0.01855			9.26	0.00536	0.00734
9.26	0.0166			9.284	0.00529	0.00687
9.284	0.01715			9.309	0.00508	0.0058
9.309	0.02051			9.333	0.00487	0.00495
9.333	0.02691			9.358	0.00504	0.00504
9.358	0.03662			9.382	0.00569	0.00595
9.382	0.04916			9.406	0.00656	0.00698
9.406	0.062			9.431	0.00737	0.00778
9.431	0.07101			9.455	0.00834	0.00926
9.455	0.07348			9.48	0.01004	0.01254
9.48	0.06957			9.504	0.01296	0.01757
9.504	0.06114			9.529	0.01712	0.02303
9.529	0.05005			9.553	0.02169	0.02771
9.553	0.0388			9.577	0.02478	0.03088
9.577	0.02981			9.602	0.02473	0.03202
9.602	0.02378			9.626	0.02179	0.03078
9.626	0.0192			9.651	0.01833	0.02755
9.651	0.01518			9.675	0.01616	0.02324
9.675	0.01241			9.7	0.01466	0.01873
9.7	0.01168			9.724	0.01213	0.01443
9.724	0.01211			9.748	0.00853	0.01064
9.748	0.0124			9.773	0.00548	0.0078
9.773	0.01242			9.797	0.00418	0.00619
9.797	0.01282			9.822	0.00419	0.00538
9.822	0.01356			9.846	0.0043	0.00468
9.846	0.01396			9.87	0.00388	0.00387
9.87	0.01375			9.895	0.00323	0.00325
9.895	0.01328			9.919	0.00286	0.00305
9.919	0.01264			9.944	0.00295	0.00325
9.944	0.01162			9.968	0.00334	0.00368
9.968	0.01024			9.993	0.00378	0.00409
9.993	0.00894			10.017	0.00396	0.0042
10.017	0.00815			10.041	0.00378	0.00395
10.041	0.0079			10.066	0.0035	0.00357
10.066	0.00786			10.09	0.00338	0.00333
10.09	0.00773			10.115	0.00336	0.00322
10.115	0.00758			10.139	0.0033	0.00315
10.139	0.00744			10.164	0.00335	0.00326
10.164	0.00713			10.188	0.00359	0.00369
10.188	0.0067			10.212	0.00367	0.00408
10.212	0.00675			10.237	0.00329	0.00392
10.237	0.00763			10.261	0.00263	0.0033
10.261	0.00868			10.286	0.00229	0.00289
10.286	0.00892			10.31	0.00262	0.00305
10.31	0.00847			10.334	0.00346	0.00348
10.334	0.00828			10.359	0.00425	0.00381
10.359	0.00879			10.383	0.00464	0.00397
10.383	0.0093			10.408	0.00468	0.00413
10.408	0.00928			10.432	0.00446	0.00437
10.432	0.00905			10.457	0.00408	0.00459
10.457	0.00923			10.481	0.00386	0.00466
10.481	0.0098			10.505	0.00413	0.00467
10.505	0.01037			10.53	0.00461	0.00481
10.53	0.01071			10.554	0.00463	0.00514
10.554	0.01073			10.579	0.004	0.00543
10.579	0.01044			10.603	0.00327	0.00536
10.603	0.01011			10.628	0.00291	0.00486
10.628	0.01006			10.652	0.00295	0.00415
10.652	0.01023			10.676	0.00313	0.00361
10.676	0.01025			10.701	0.00334	0.00346
10.701	0.00984			10.725	0.00361	0.00369
10.725	0.00918			10.75	0.00394	0.00416
10.75	0.00853			10.774	0.00403	0.00476
10.774	0.00813			10.798	0.00365	0.00524
10.798	0.0081			10.823	0.00303	0.00521
10.823	0.00853			10.847	0.00291	0.00467
10.847	0.00926			10.872	0.0036	0.00421
10.872	0.00976			10.896	0.00454	0.0044
10.896	0.00953			10.921	0.00497	0.00493
10.921	0.00857			10.945	0.00479	0.00499
10.945	0.00757			10.969	0.00444	0.00454
10.969	0.00708			10.994	0.00427	0.00439
10.994	0.00739			11.018	0.00427	0.00497
11.018	0.00886			11.043	0.00447	0.00568
11.043	0.0123			11.067	0.00497	0.00601
11.067	0.01794			11.092	0.00599	0.00652
11.092	0.02468			11.116	0.00776	0.00796
11.116	0.0309			11.14	0.0104	0.01015
11.14	0.03628			11.165	0.01328	0.01215
11.165	0.04163			11.189	0.01526	0.01357
11.189	0.04682			11.214	0.01569	0.01477
11.214	0.04997			11.238	0.01523	0.01605
11.238	0.04905			11.262	0.01479	0.01685
11.262	0.04391			11.287	0.01429	0.01635
11.287	0.03636			11.311	0.01293	0.0144
11.311	0.0289			11.336	0.01062	0.01185
11.336	0.02334			11.36	0.00831	0.00974
11.36	0.01968			11.385	0.00694	0.00845
11.385	0.01676			11.409	0.0066	0.00761
11.409	0.0138			11.433	0.00655	0.00688
11.433	0.01152			11.458	0.00604	0.00629
11.458	0.01054			11.482	0.00512	0.00599
11.482	0.01035			11.507	0.00448	0.00579
11.507	0.00997			11.531	0.00443	0.0055
11.531	0.00948			11.556	0.00471	0.00504
11.556	0.00944			11.58	0.00508	0.00455
11.58	0.00978			11.604	0.00545	0.00427
11.604	0.0098			11.629	0.00566	0.00446
11.629	0.0094			11.653	0.0057	0.00505
11.653	0.00913			11.678	0.00576	0.00574
11.678	0.00946			11.702	0.00592	0.00651
11.702	0.01014			11.726	0.00579	0.0074
11.726	0.01058			11.751	0.00523	0.00816
11.751	0.01046			11.775	0.00472	0.00836
11.775	0.01014			11.8	0.005	0.00799
11.8	0.01019			11.824	0.00607	0.00741
11.824	0.01064			11.849	0.00737	0.00715
11.849	0.01105			11.873	0.00848	0.00752
11.873	0.01122			11.897	0.00951	0.00839
11.897	0.0113			11.922	0.01037	0.00926
11.922	0.01127			11.946	0.01082	0.00985
11.946	0.01118			11.971	0.01084	0.01027
11.971	0.01129			11.995	0.0108	0.01067
11.995	0.01191			12.02	0.01061	0.0109
12.02	0.01258			12.044	0.01005	0.01071
12.044	0.01248			12.068	0.00927	0.01012
12.068	0.01133			12.093	0.00882	0.00933
12.093	0.01017			12.117	0.00866	0.00882
12.117	0.01034			12.142	0.00857	0.00897
12.142	0.01197			12.166	0.00866	0.00981
12.166	0.01345			12.19	0.00934	0.01095
12.19	0.01332			12.215	0.01023	0.012
12.215	0.01211			12.239	0.01046	0.01262
12.239	0.01181			12.264	0.00974	0.01292
12.264	0.0133			12.288	0.00907	0.01322
12.288	0.0153			12.313	0.0098	0.01367
12.313	0.01595			12.337	0.01218	0.01387
12.337	0.01511			12.361	0.01479	0.01369
12.361	0.0143			12.386	0.01575	0.01366
12.386	0.01483			12.41	0.01484	0.0143
12.41	0.01655			12.435	0.01389	0.0153
12.435	0.0185			12.459	0.01464	0.01612
12.459	0.02022			12.484	0.01662	0.01669
12.484	0.0217			12.508	0.01802	0.01734
12.508	0.02263			12.532	0.01804	0.0181
12.532	0.02265			12.557	0.0174	0.01878
12.557	0.02213			12.581	0.0171	0.01943
12.581	0.02184			12.606	0.01721	0.0203
12.606	0.02187			12.63	0.01727	0.02121
12.63	0.02177			12.654	0.01701	0.02156
12.654	0.02136			12.679	0.01687	0.02119
12.679	0.02086			12.703	0.01743	0.02072
12.703	0.02029			12.728	0.01884	0.02069
12.728	0.01983			12.752	0.02031	0.02105
12.752	0.01999			12.777	0.02104	0.02158
12.777	0.0213			12.801	0.02089	0.02215
12.801	0.02338			12.825	0.02073	0.02266
12.825	0.02527			12.85	0.02114	0.02304
12.85	0.0262			12.874	0.02169	0.02324
12.874	0.02602			12.899	0.02147	0.0231
12.899	0.02519			12.923	0.02067	0.02277
12.923	0.02454			12.948	0.02042	0.02294
12.948	0.02463			12.972	0.02136	0.024
12.972	0.02519			12.996	0.02303	0.0253
12.996	0.02567			13.021	0.0248	0.02592
13.021	0.02593			13.045	0.0265	0.02577
13.045	0.02623			13.07	0.02797	0.02545
13.07	0.02686			13.094	0.02903	0.02578
13.094	0.02803			13.118	0.02961	0.02717
13.118	0.02947			13.143	0.02981	0.02917
13.143	0.03033			13.167	0.02962	0.0305
13.167	0.03002			13.192	0.02917	0.03096
13.192	0.0292			13.216	0.02908	0.03191
13.216	0.02906			13.241	0.03033	0.03424
13.241	0.03032			13.265	0.0332	0.03669
13.265	0.03304			13.289	0.03627	0.03782
13.289	0.03653			13.314	0.03752	0.03789
13.314	0.03881			13.338	0.0367	0.03798
13.338	0.03837			13.363	0.03616	0.03843
13.363	0.03627			13.387	0.03782	0.03957
13.387	0.03552			13.412	0.04067	0.042
13.412	0.03729			13.436	0.04189	0.04494
13.436	0.04011			13.46	0.04085	0.04593
13.46	0.04199			13.485	0.03951	0.04409
13.485	0.04253			13.509	0.04014	0.04192
13.509	0.04228			13.534	0.04278	0.04284
13.534	0.04227			13.558	0.04589	0.04705
13.558	0.04323			13.582	0.04735	0.05191
13.582	0.04495			13.607	0.0468	0.0548
13.607	0.04606			13.631	0.04614	0.05516
13.631	0.04558			13.656	0.04756	0.05375
13.656	0.04428			13.68	0.0503	0.0523
13.68	0.04457			13.705	0.05215	0.05263
13.705	0.04769			13.729	0.05248	0.05505
13.729	0.05201			13.753	0.05283	0.05782
13.753	0.05486			13.778	0.05389	0.05946
13.778	0.05578			13.802	0.05535	0.06018
13.802	0.05621			13.827	0.05704	0.06057
13.827	0.05675			13.851	0.05966	0.06057
13.851	0.05688			13.876	0.06286	0.06059
13.876	0.05682			13.9	0.06543	0.06206
13.9	0.05808			13.924	0.06644	0.06605
13.924	0.06181			13.949	0.06678	0.07144
13.949	0.06739			13.973	0.06813	0.07589
13.973	0.07251			13.998	0.07195	0.07813
13.998	0.07532			14.022	0.07828	0.08017
14.022	0.07632			14.046	0.08606	0.08524
14.046	0.0774			14.071	0.09364	0.09469
14.071	0.07919			14.095	0.09977	0.10585
14.095	0.08129			14.12	0.1037	0.11475
14.12	0.08388			14.144	0.1056	0.11947
14.144	0.08734			14.169	0.10684	0.12181
14.169	0.09057			14.193	0.10886	0.12358
14.193	0.09226			14.217	0.11082	0.12368
14.217	0.093			14.242	0.11019	0.11964
14.242	0.09396			14.266	0.10639	0.11277
14.266	0.09462			14.291	0.10195	0.10707
14.291	0.09315			14.315	0.09935	0.10453
14.315	0.08956			14.34	0.09839	0.10383
14.34	0.08664			14.364	0.09814	0.10408
14.364	0.08741			14.388	0.09837	0.10536
14.388	0.09107			14.413	0.09883	0.10666
14.413	0.09356			14.437	0.09857	0.10684
14.437	0.09271			14.462	0.09837	0.10682
14.462	0.09129			14.486	0.10036	0.10816
14.486	0.09299			14.51	0.10482	0.11009
14.51	0.09689			14.535	0.10846	0.11135
14.535	0.09879			14.559	0.1084	0.11233
14.559	0.09754			14.584	0.10576	0.11482
14.584	0.0971			14.608	0.10418	0.11904
14.608	0.10046			14.633	0.1055	0.12344
14.633	0.10564			14.657	0.10881	0.12533
14.657	0.10953			14.681	0.11278	0.12408
14.681	0.11246			14.706	0.11646	0.12214
14.706	0.1158			14.73	0.11894	0.12306
14.73	0.11891			14.755	0.11974	0.12675
14.755	0.12066			14.779	0.12004	0.13023
14.779	0.12178			14.804	0.12117	0.13168
14.804	0.12363			14.828	0.12369	0.13335
14.828	0.12602			14.852	0.12678	0.13795
14.852	0.1275			14.877	0.13	0.14472
14.877	0.12752			14.901	0.13328	0.14979
14.901	0.12834			14.926	0.13772	0.1514
14.926	0.13232			14.95	0.14284	0.15157
14.95	0.13868			14.974	0.14643	0.15289
14.974	0.14436			14.999	0.14668	0.15561
14.999	0.14965			15.023	0.14534	0.1589
15.023	0.15631			15.048	0.14538	0.16233
15.048	0.16271			15.072	0.14784	0.16556
15.072	0.16424			15.097	0.15076	0.16806
15.097	0.1616			15.121	0.15161	0.16926
15.121	0.16047			15.145	0.14996	0.16878
15.145	0.16384			15.17	0.14916	0.1677
15.17	0.16763			15.194	0.15267	0.16861
15.194	0.16779			15.219	0.15938	0.17275
15.219	0.16598			15.243	0.16497	0.17833
15.243	0.16728			15.268	0.16836	0.18323
15.268	0.17274			15.292	0.17209	0.18702
15.292	0.17799			15.316	0.17668	0.18998
15.316	0.17889			15.341	0.17988	0.19153
15.341	0.17732			15.365	0.18097	0.19187
15.365	0.1788			15.39	0.18256	0.19277
15.39	0.18504			15.414	0.18555	0.19701
15.414	0.19173			15.438	0.18817	0.20444
15.438	0.19479			15.463	0.18917	0.21172
15.463	0.19516			15.487	0.19106	0.21528
15.487	0.19562			15.512	0.19583	0.21557
15.512	0.19671			15.536	0.20141	0.21465
15.536	0.19895			15.561	0.20386	0.21444
15.561	0.20436			15.585	0.20288	0.21701
15.585	0.21314			15.609	0.20134	0.22392
15.609	0.2213			15.634	0.20089	0.23141
15.634	0.22606			15.658	0.2012	0.23339
15.658	0.2288			15.683	0.20296	0.22968
15.683	0.23253			15.707	0.20824	0.22727
15.707	0.23763			15.732	0.21684	0.23066
15.732	0.2436			15.756	0.22466	0.23726
15.756	0.24905			15.78	0.2275	0.24286
15.78	0.25194			15.805	0.22605	0.24755
15.805	0.25033			15.829	0.2257	0.25321
15.829	0.24626			15.854	0.23046	0.25905
15.854	0.24436			15.878	0.23816	0.26202
15.878	0.24795			15.902	0.24305	0.26078
15.902	0.25549			15.927	0.24337	0.2576
15.927	0.26266			15.951	0.24363	0.25696
15.951	0.26556			15.976	0.24739	0.26189
15.976	0.26377			16	0.25151	0.27132
16	0.26052			16.025	0.25185	0.28008
16.025	0.26125			16.049	0.25099	0.28393
16.049	0.26886			16.073	0.25355	0.28342
16.073	0.28014			16.098	0.25756	0.28317
16.098	0.28803			16.122	0.25789	0.28558
16.122	0.28924			16.147	0.25584	0.28871
16.147	0.28759			16.171	0.25761	0.28968
16.171	0.28907			16.196	0.26516	0.28953
16.196	0.29492			16.22	0.27454	0.29152
16.22	0.30142			16.244	0.28136	0.29729
16.244	0.30576			16.269	0.28439	0.30528
16.269	0.30898			16.293	0.28481	0.31231
16.293	0.31245			16.318	0.28463	0.31601
16.318	0.31436			16.342	0.28521	0.31722
16.342	0.31371			16.366	0.28652	0.31927
16.366	0.31429			16.391	0.28836	0.32343
16.391	0.32138			16.415	0.2908	0.32625
16.415	0.33332			16.44	0.29407	0.32465
16.44	0.34353			16.464	0.29726	0.32173
16.464	0.3482			16.489	0.29969	0.32427
16.489	0.35052			16.513	0.30171	0.3342
16.513	0.353			16.537	0.3052	0.34635
16.537	0.35506			16.562	0.31077	0.35376
16.562	0.35528			16.586	0.31644	0.3541
16.586	0.35611			16.611	0.31914	0.35006
16.611	0.35854			16.635	0.3189	0.34692
16.635	0.36131			16.66	0.31934	0.34815
16.66	0.36168			16.684	0.32354	0.35355
16.684	0.36125			16.708	0.33035	0.35937
16.708	0.36325			16.733	0.33594	0.36324
16.733	0.36973			16.757	0.33859	0.36556
16.757	0.37722			16.782	0.34022	0.36807
16.782	0.3824			16.806	0.34279	0.37008
16.806	0.38575			16.83	0.34533	0.37079
16.83	0.39104			16.855	0.34554	0.37131
16.855	0.39799			16.879	0.34352	0.37413
16.879	0.40383			16.904	0.34101	0.37826
16.904	0.40664			16.928	0.33999	0.38022
16.928	0.40699			16.953	0.34137	0.37869
16.953	0.40527			16.977	0.34577	0.37808
16.977	0.40418			17.001	0.35259	0.38317
17.001	0.4073			17.026	0.36121	0.39248
17.026	0.41419			17.05	0.36988	0.39938
17.05	0.41885			17.075	0.37639	0.4009
17.075	0.41841			17.099	0.37973	0.40125
17.099	0.41777			17.124	0.38235	0.40496
17.124	0.42328			17.148	0.38592	0.4109
17.148	0.43369			17.172	0.38794	0.41563
17.172	0.44204			17.197	0.38487	0.41935
17.197	0.44435			17.221	0.3782	0.42386
17.221	0.44445			17.246	0.37265	0.42747
17.246	0.44888			17.27	0.37078	0.42698
17.27	0.45902			17.294	0.37311	0.42428
17.294	0.47012			17.319	0.38091	0.42538
17.319	0.47671			17.343	0.39392	0.43224
17.343	0.47716			17.368	0.40693	0.43936
17.368	0.47294			17.392	0.41367	0.44014
17.392	0.46836			17.417	0.41321	0.4346
17.417	0.46837			17.441	0.40949	0.42946
17.441	0.47487			17.465	0.40602	0.43127
17.465	0.48429			17.49	0.40378	0.44027
17.49	0.49226			17.514	0.40322	0.45079
17.514	0.49788			17.539	0.40549	0.45725
17.539	0.50221			17.563	0.41141	0.45892
17.563	0.50487			17.588	0.41921	0.45897
17.588	0.50445			17.612	0.42459	0.46023
17.612	0.50271			17.636	0.42474	0.46323
17.636	0.50392			17.661	0.42196	0.46797
17.661	0.51082			17.685	0.4209	0.47441
17.685	0.52042			17.71	0.4235	0.48097
17.71	0.52758			17.734	0.42776	0.48475
17.734	0.52842			17.758	0.43126	0.48508
17.758	0.52373			17.783	0.43308	0.48402
17.783	0.51899			17.807	0.43502	0.48376
17.807	0.52209			17.832	0.43876	0.48475
17.832	0.53437			17.856	0.44338	0.48727
17.856	0.54753			17.881	0.44597	0.49134
17.881	0.55239			17.905	0.4468	0.49619
17.905	0.54979			17.929	0.44819	0.50019
17.929	0.54733			17.954	0.45019	0.5026
17.954	0.54957			17.978	0.45068	0.50463
17.978	0.55559			18.003	0.45013	0.50791
18.003	0.56295			18.027	0.45108	0.51231
18.027	0.56866			18.052	0.45387	0.51527
18.052	0.57061			18.076	0.45715	0.51504
18.076	0.57021			18.1	0.46049	0.51293
18.1	0.57153			18.125	0.46414	0.51289
18.125	0.57527			18.149	0.4669	0.51669
18.149	0.57994			18.174	0.46856	0.52127
18.174	0.58501			18.198	0.4703	0.52236
18.198	0.59128			18.222	0.4725	0.52043
18.222	0.59716			18.247	0.47316	0.52087
18.247	0.6021			18.271	0.47244	0.52702
18.271	0.60679			18.296	0.47319	0.53705
18.296	0.61059			18.32	0.47765	0.54633
18.32	0.61029			18.345	0.48347	0.55213
18.345	0.60668			18.369	0.48784	0.55389
18.369	0.6053			18.393	0.49039	0.5523
18.393	0.61014			18.418	0.49323	0.54992
18.418	0.61863			18.442	0.49626	0.55066
18.442	0.62617			18.467	0.4983	0.55647
18.467	0.63115			18.491	0.49924	0.56324
18.491	0.63528			18.515	0.50187	0.56583
18.515	0.63941			18.54	0.50687	0.56274
18.54	0.64227			18.564	0.51175	0.5578
18.564	0.64227			18.589	0.51348	0.55457
18.589	0.64105			18.613	0.51302	0.55623
18.613	0.64255			18.638	0.51244	0.56273
18.638	0.64836			18.662	0.5124	0.57037
18.662	0.65566			18.686	0.51272	0.57325
18.686	0.66049			18.711	0.51358	0.57165
18.711	0.66186			18.735	0.51513	0.57085
18.735	0.66079			18.76	0.51876	0.57435
18.76	0.65931			18.784	0.52639	0.57951
18.784	0.65878			18.809	0.53508	0.58296
18.809	0.66108			18.833	0.53685	0.58327
18.833	0.66802			18.857	0.52902	0.58165
18.857	0.67978			18.882	0.51961	0.58177
18.882	0.69199			18.906	0.51947	0.58714
18.906	0.69924			18.931	0.53	0.59408
18.931	0.70073			18.955	0.54288	0.59404
18.955	0.69937			18.979	0.54784	0.5857
18.979	0.69724			19.004	0.54396	0.57965
19.004	0.69541			19.028	0.54038	0.58456
19.028	0.69633			19.053	0.54559	0.59567
19.053	0.70084			19.077	0.55512	0.60191
19.077	0.70782			19.102	0.55733	0.60163
19.102	0.71629			19.126	0.54877	0.60219
19.126	0.72411			19.15	0.53894	0.608
19.15	0.72522			19.175	0.53891	0.61476
19.175	0.71832			19.199	0.54982	0.61743
19.199	0.71482			19.224	0.56238	0.61614
19.224	0.72671			19.248	0.56711	0.61474
19.248	0.74714			19.273	0.56399	0.6154
19.273	0.75726			19.297	0.56186	0.61824
19.297	0.75214			19.321	0.56655	0.62221
19.321	0.74598			19.346	0.57407	0.62618
19.346	0.74977			19.37	0.57602	0.62832
19.37	0.7591			19.395	0.57177	0.62904
19.395	0.76625			19.419	0.56836	0.63162
19.419	0.77059			19.443	0.57085	0.63849
19.443	0.77376			19.468	0.57508	0.64596
19.468	0.77614			19.492	0.5762	0.64825
19.492	0.77953			19.517	0.57592	0.64469
19.517	0.78419			19.541	0.57871	0.64037
19.541	0.78637			19.566	0.58242	0.64003
19.566	0.78446			19.59	0.58354	0.64528
19.59	0.78427			19.614	0.58411	0.65488
19.614	0.79103			19.639	0.58891	0.66376
19.639	0.80298			19.663	0.59624	0.66465
19.663	0.81475			19.688	0.60118	0.65549
19.688	0.82275			19.712	0.60214	0.64494
19.712	0.82508			19.737	0.60117	0.64503
19.737	0.82286			19.761	0.6002	0.65873
19.761	0.82235			19.785	0.60077	0.67641
19.785	0.83013			19.81	0.60389	0.68645
19.81	0.84508			19.834	0.60825	0.68567
19.834	0.85848			19.859	0.6125	0.67997
19.859	0.8639			19.883	0.61783	0.67535
19.883	0.86664			19.907	0.62609	0.6729
19.907	0.87871			19.932	0.63418	0.67143
19.932	0.90549			19.956	0.63819	0.67287
19.956	0.93848			19.981	0.6398	0.68022
19.981	0.96774			20.005	0.64488	0.69325
20.005	0.99096			20.03	0.65361	0.708
20.03	1.01204			20.054	0.66214	0.72036
20.054	1.03356			20.078	0.66974	0.72823
20.078	1.05942			20.103	0.67955	0.73252
20.103	1.0917			20.127	0.69046	0.7364
20.127	1.12687			20.152	0.6992	0.7426
20.152	1.15716			20.176	0.70654	0.75159
20.176	1.18137			20.201	0.71813	0.76215
20.201	1.20503			20.225	0.73684	0.77333
20.225	1.23346			20.249	0.76159	0.78525
20.249	1.26668			20.274	0.78887	0.80058
20.274	1.30262			20.298	0.81419	0.82103
20.298	1.33873			20.323	0.83245	0.84411
20.323	1.37065			20.347	0.84427	0.86502
20.347	1.39395			20.371	0.8577	0.88477
20.371	1.40815			20.396	0.88116	0.90965
20.396	1.41614			20.42	0.91386	0.94296
20.42	1.41709			20.445	0.94784	0.97906
20.445	1.40781			20.469	0.97623	1.00855
20.469	1.39102			20.494	0.99604	1.02852
20.494	1.37656			20.518	1.00778	1.04568
20.518	1.36748			20.542	1.01636	1.06758
20.542	1.35523			20.567	1.0303	1.09187
20.567	1.33285			20.591	1.05069	1.11201
20.591	1.30641			20.616	1.06841	1.1287
20.616	1.28357			20.64	1.07311	1.14916
20.64	1.2614			20.665	1.06662	1.17169
20.665	1.23329			20.689	1.05864	1.18587
20.689	1.202			20.713	1.05622	1.18564
20.713	1.17467			20.738	1.05695	1.17792
20.738	1.15066			20.762	1.05435	1.17166
20.762	1.1231			20.787	1.04411	1.1689
20.787	1.09133			20.811	1.02624	1.1638
20.811	1.06306			20.835	1.00301	1.1513
20.835	1.04378			20.86	0.97691	1.13183
20.86	1.02939			20.884	0.95066	1.11047
20.884	1.01298			20.909	0.92655	1.09027
20.909	0.99315			20.933	0.90591	1.07074
20.933	0.97311			20.958	0.88748	1.04976
20.958	0.95488			20.982	0.8673	1.02493
20.982	0.93977			21.006	0.84114	0.99506
21.006	0.93019			21.031	0.80879	0.96348
21.031	0.92595			21.055	0.77583	0.9364
21.055	0.9208			21.08	0.7507	0.91496
21.08	0.9081			21.104	0.73752	0.89366
21.104	0.89109			21.129	0.73147	0.86785
21.129	0.87975			21.153	0.72239	0.83995
21.153	0.87853			21.177	0.70536	0.81631
21.177	0.87986			21.202	0.68339	0.80064
21.202	0.87619			21.226	0.66248	0.79167
21.226	0.86776			21.251	0.64554	0.78389
21.251	0.85948			21.275	0.63495	0.77139
21.275	0.85221			21.299	0.63142	0.75215
21.299	0.84626			21.324	0.63213	0.73127
21.324	0.84311			21.348	0.63082	0.71593
21.348	0.84357			21.373	0.62431	0.70822
21.373	0.84348			21.397	0.61396	0.70317
21.397	0.83835			21.422	0.60447	0.69571
21.422	0.82852			21.446	0.60031	0.68584
21.446	0.81976			21.47	0.6026	0.6769
21.47	0.81651			21.495	0.60693	0.67031
21.495	0.8174			21.519	0.6076	0.66513
21.519	0.81921			21.544	0.60313	0.66142
21.544	0.82136			21.568	0.59559	0.65966
21.568	0.82418			21.593	0.58685	0.65821
21.593	0.82399			21.617	0.57865	0.65486
21.617	0.81737			21.641	0.57449	0.65202
21.641	0.80614			21.666	0.57688	0.65237
21.666	0.79723			21.69	0.58348	0.65297
21.69	0.79539			21.715	0.58908	0.64825
21.715	0.79964			21.739	0.59047	0.64072
21.739	0.8035			21.763	0.58805	0.63768
21.763	0.80133			21.788	0.58283	0.63972
21.788	0.79471			21.812	0.57644	0.63959
21.812	0.79193			21.837	0.57212	0.63459
21.837	0.79883			21.861	0.57405	0.63113
21.861	0.81332			21.886	0.58182	0.63382
21.886	0.8292			21.91	0.59059	0.6386
21.91	0.8418			21.934	0.59478	0.63921
21.934	0.84896			21.959	0.59324	0.63707
21.959	0.85217			21.983	0.58752	0.63753
21.983	0.85649			22.008	0.58123	0.64344
22.008	0.86684			22.032	0.57875	0.65295
22.032	0.88204			22.057	0.58368	0.66354
22.057	0.89533			22.081	0.59397	0.67155
22.081	0.90031			22.105	0.60277	0.67444
22.105	0.89756			22.13	0.60508	0.67304
22.13	0.89392			22.154	0.60205	0.6718
22.154	0.89391			22.179	0.59755	0.67233
22.179	0.89424			22.203	0.59259	0.67216
22.203	0.89			22.227	0.58661	0.66769
22.227	0.88208			22.252	0.58008	0.65883
22.252	0.87177			22.276	0.57516	0.64778
22.276	0.85489			22.301	0.57245	0.63804
22.301	0.82997			22.325	0.56953	0.63037
22.325	0.80712			22.35	0.56162	0.62343
22.35	0.79693			22.374	0.54768	0.61467
22.374	0.79544			22.398	0.53424	0.60449
22.398	0.79088			22.423	0.53022	0.59381
22.423	0.78111			22.447	0.53645	0.58531
22.447	0.77471			22.472	0.54412	0.58122
22.472	0.77837			22.496	0.54508	0.58195
22.496	0.7911			22.521	0.53944	0.5836
22.521	0.8071			22.545	0.53331	0.58437
22.545	0.82055			22.569	0.53097	0.58602
22.569	0.83002			22.594	0.53258	0.58908
22.594	0.83739			22.618	0.53496	0.58993
22.618	0.84249			22.643	0.5346	0.58687
22.643	0.84253			22.667	0.53145	0.58198
22.667	0.83884			22.691	0.53021	0.57695
22.691	0.83692			22.716	0.53512	0.57351
22.716	0.83985			22.74	0.54359	0.57618
22.74	0.84561			22.765	0.55034	0.58687
22.765	0.85089			22.789	0.55385	0.59947
22.789	0.85309			22.814	0.55788	0.60685
22.814	0.85051			22.838	0.5641	0.61092
22.838	0.84463			22.862	0.57016	0.61769
22.862	0.83965			22.887	0.57191	0.62688
22.887	0.83751			22.911	0.56953	0.63284
22.911	0.83464			22.936	0.56706	0.63486
22.936	0.82688			22.96	0.56767	0.63576
22.96	0.81521			22.985	0.56881	0.63488
22.985	0.8041			23.009	0.56615	0.62916
23.009	0.79604			23.033	0.56141	0.62113
23.033	0.78993			23.058	0.56143	0.61705
23.058	0.78432			23.082	0.56822	0.61986
23.082	0.77885			23.107	0.57452	0.62695
23.107	0.77354			23.131	0.57419	0.63243
23.131	0.76772			23.155	0.57103	0.63107
23.155	0.75984			23.18	0.57283	0.62347
23.18	0.74955			23.204	0.57851	0.61724
23.204	0.73964			23.229	0.57988	0.61757
23.229	0.73456			23.253	0.57233	0.621
23.253	0.73262			23.278	0.55898	0.62035
23.278	0.72614			23.302	0.54396	0.61499
23.302	0.71099			23.326	0.53055	0.60923
23.326	0.694			23.351	0.52164	0.60602
23.351	0.68377			23.375	0.51813	0.60369
23.375	0.68123			23.4	0.51667	0.60093
23.4	0.68107			23.424	0.51513	0.59745
23.424	0.67937			23.449	0.51302	0.59303
23.449	0.67496			23.473	0.50808	0.58611
23.473	0.66879			23.497	0.49685	0.57683
23.497	0.66267			23.522	0.48321	0.56753
23.522	0.65646			23.546	0.47542	0.56083
23.546	0.64811			23.571	0.47628	0.55602
23.571	0.63916			23.595	0.47972	0.54953
23.595	0.63478			23.619	0.47984	0.53943
23.619	0.63509			23.644	0.47523	0.52857
23.644	0.63216			23.668	0.46684	0.52092
23.668	0.62135			23.693	0.45562	0.51675
23.693	0.60857			23.717	0.44426	0.51328
23.717	0.60331			23.742	0.437	0.50899
23.742	0.60588			23.766	0.43518	0.5035
23.766	0.60904			23.79	0.43437	0.49639
23.79	0.6067			23.815	0.42863	0.48773
23.815	0.60035			23.839	0.41848	0.48009
23.839	0.59352			23.864	0.40994	0.47526
23.864	0.58839			23.888	0.40627	0.47199
23.888	0.5844			23.913	0.40471	0.4679
23.913	0.58085			23.937	0.40415	0.46401
23.937	0.57575			23.961	0.40726	0.46243
23.961	0.56931			23.986	0.41323	0.46242
23.986	0.56534			24.01	0.41439	0.46022
24.01	0.56837			24.035	0.40679	0.45352
24.035	0.57443			24.059	0.39595	0.44388
24.059	0.57385			24.083	0.3893	0.43535
24.083	0.5623			24.108	0.38694	0.4314
24.108	0.54724			24.132	0.38512	0.43218
24.132	0.53727			24.157	0.38207	0.43456
24.157	0.53323			24.181	0.37799	0.43387
24.181	0.53114			24.206	0.37247	0.42867
24.206	0.52975			24.23	0.36636	0.4226
24.23	0.52892			24.254	0.36313	0.42047
24.254	0.52573			24.279	0.36436	0.42049
24.279	0.51741			24.303	0.36645	0.41562
24.303	0.50653			24.328	0.3647	0.40316
24.328	0.50004			24.352	0.3597	0.38991
24.352	0.50209			24.377	0.35485	0.38475
24.377	0.50865			24.401	0.3513	0.38826
24.401	0.51107			24.425	0.34816	0.39228
24.425	0.50549			24.45	0.34633	0.38911
24.45	0.49589			24.474	0.34747	0.38054
24.474	0.48658			24.499	0.35052	0.37413
24.499	0.47808			24.523	0.35153	0.37347
24.523	0.47144			24.547	0.34696	0.37427
24.547	0.47041			24.572	0.33804	0.37265
24.572	0.47537			24.596	0.3303	0.3691
24.596	0.48101			24.621	0.32855	0.36554
24.621	0.4829			24.645	0.33087	0.36094
24.645	0.48122			24.67	0.33104	0.35576
24.67	0.47693			24.694	0.32554	0.35288
24.694	0.46792			24.718	0.31732	0.35421
24.718	0.45503			24.743	0.31138	0.35706
24.743	0.44436			24.767	0.30935	0.35906
24.767	0.44228			24.792	0.30936	0.35982
24.792	0.44613			24.816	0.30927	0.3593
24.816	0.44912			24.841	0.30807	0.35568
24.841	0.44809			24.865	0.30542	0.34876
24.865	0.44669			24.889	0.3021	0.34086
24.889	0.44697			24.914	0.30028	0.33566
24.914	0.44717			24.938	0.30054	0.33533
24.938	0.44484			24.963	0.2998	0.3387
24.963	0.44128			24.987	0.29445	0.34142
24.987	0.43731			25.011	0.2866	0.33991
25.011	0.4302			25.036	0.28202	0.33412
25.036	0.41714			25.06	0.28233	0.32611
25.06	0.40119			25.085	0.28252	0.31824
25.085	0.38943			25.109	0.27939	0.31272
25.109	0.38512			25.134	0.27579	0.31054
25.134	0.38496			25.158	0.27488	0.3091
25.158	0.3838			25.182	0.27377	0.30484
25.182	0.38049			25.207	0.26795	0.29753
25.207	0.37644			25.231	0.25737	0.29073
25.231	0.37157			25.256	0.24658	0.28732
25.256	0.3628			25.28	0.23972	0.2877
25.28	0.34984			25.305	0.23831	0.29056
25.305	0.33816			25.329	0.24083	0.29264
25.329	0.33444			25.353	0.24358	0.28954
25.353	0.33752			25.378	0.24324	0.28016
25.378	0.34019			25.402	0.23965	0.26984
25.402	0.33719			25.427	0.23542	0.26459
25.427	0.32947			25.451	0.23192	0.26436
25.451	0.32037			25.475	0.229	0.26375
25.475	0.3134			25.5	0.22644	0.26043
25.5	0.31099			25.524	0.22506	0.25641
25.524	0.3115			25.549	0.22407	0.25304
25.549	0.30887			25.573	0.22194	0.24766
25.573	0.29956			25.598	0.21814	0.23995
25.598	0.28792			25.622	0.2142	0.23412
25.622	0.28145			25.646	0.21079	0.234
25.646	0.28178			25.671	0.20723	0.237
25.671	0.28406			25.695	0.2026	0.23822
25.695	0.28254			25.72	0.1973	0.23567
25.72	0.27589			25.744	0.19216	0.23091
25.744	0.26598			25.769	0.18827	0.22513
25.769	0.25681			25.793	0.18635	0.21898
25.793	0.25117			25.817	0.18569	0.21361
25.817	0.24993			25.842	0.18402	0.21075
25.842	0.24997			25.866	0.17988	0.21044
25.866	0.24805			25.891	0.17463	0.21076
25.891	0.24258			25.915	0.17043	0.2097
25.915	0.23578			25.939	0.16797	0.20669
25.939	0.2294			25.964	0.16647	0.20221
25.964	0.22331			25.988	0.16568	0.19663
25.988	0.21584			26.013	0.16511	0.19056
26.013	0.20852			26.037	0.16339	0.18527
26.037	0.20434			26.062	0.1593	0.18228
26.062	0.20358			26.086	0.15388	0.18131
26.086	0.20233			26.11	0.14944	0.18045
26.11	0.19815			26.135	0.1469	0.17846
26.135	0.19249			26.159	0.14516	0.17599
26.159	0.18825			26.184	0.14214	0.17313
26.184	0.18628			26.208	0.13717	0.16834
26.208	0.18578			26.233	0.13196	0.16133
26.233	0.18446			26.257	0.12956	0.15486
26.257	0.17968			26.281	0.13038	0.15131
26.281	0.17051			26.306	0.13174	0.14936
26.306	0.16009			26.33	0.13097	0.1462
26.33	0.15225			26.355	0.12756	0.14224
26.355	0.14808			26.379	0.12196	0.14004
26.379	0.14519			26.403	0.11512	0.13958
26.403	0.14197			26.428	0.10928	0.13702
26.428	0.13819			26.452	0.10646	0.13093
26.452	0.13422			26.477	0.10613	0.1252
26.477	0.12938			26.501	0.10583	0.12412
26.501	0.12339			26.526	0.10396	0.12586
26.526	0.11619			26.55	0.10022	0.12542
26.55	0.10927			26.574	0.09507	0.12123
26.574	0.10518			26.599	0.08967	0.11638
26.599	0.10531			26.623	0.08598	0.11386
26.623	0.10703			26.648	0.08467	0.11352
26.648	0.1061			26.672	0.08474	0.11311
26.672	0.10157			26.697	0.08447	0.11078
26.697	0.0963			26.721	0.08321	0.10647
26.721	0.09322			26.745	0.08074	0.10123
26.745	0.09216			26.77	0.07747	0.09595
26.77	0.09107			26.794	0.07374	0.09104
26.794	0.08779			26.819	0.06992	0.08716
26.819	0.08239			26.843	0.06636	0.08469
26.843	0.07685			26.867	0.06399	0.08255
26.867	0.07398			26.892	0.06292	0.0789
26.892	0.07413			26.916	0.06162	0.07377
26.916	0.07504			26.941	0.05794	0.06952
26.941	0.07383			26.965	0.05232	0.06767
26.965	0.07042			26.99	0.04751	0.06649
26.99	0.06637			27.014	0.04566	0.06344
27.014	0.06317			27.038	0.04563	0.05864
27.038	0.06074			27.063	0.04531	0.05458
27.063	0.05909			27.087	0.04422	0.05254
27.087	0.05812			27.112	0.04349	0.05153
27.112	0.05739			27.136	0.04293	0.05002
27.136	0.05566			27.161	0.04123	0.04814
27.161	0.05268			27.185	0.03816	0.04662
27.185	0.04935			27.209	0.0351	0.0454
27.209	0.04727			27.234	0.03303	0.04336
27.234	0.04708			27.258	0.03181	0.04072
27.258	0.04803			27.283	0.03106	0.03899
27.283	0.04828			27.307	0.03021	0.03884
27.307	0.04672			27.331	0.02854	0.03828
27.331	0.04398			27.356	0.02633	0.03556
27.356	0.04145			27.38	0.02486	0.03174
27.38	0.03968			27.405	0.02442	0.0297
27.405	0.03836			27.429	0.02388	0.03029
27.429	0.03725			27.454	0.02265	0.03154
27.454	0.03669			27.478	0.02147	0.03113
27.478	0.03698			27.502	0.02085	0.02878
27.502	0.03773			27.527	0.02042	0.02588
27.527	0.03784			27.551	0.01989	0.02371
27.551	0.0366			27.576	0.01939	0.02234
27.576	0.03441			27.6	0.01884	0.02113
27.6	0.03237			27.625	0.01778	0.01966
27.625	0.03118			27.649	0.01627	0.01819
27.649	0.03055			27.673	0.01477	0.01725
27.673	0.03004			27.698	0.01368	0.01689
27.698	0.02972			27.722	0.01288	0.01668
27.722	0.02987			27.747	0.01227	0.01634
27.747	0.02998			27.771	0.01173	0.01608
27.771	0.02938			27.795	0.01115	0.01571
27.795	0.02838			27.82	0.01038	0.01454
27.82	0.02826			27.844	0.00971	0.0125
27.844	0.02903			27.869	0.00954	0.01075
27.869	0.02907			27.893	0.00986	0.01021
27.893	0.02734			27.918	0.01009	0.01044
27.918	0.02519			27.942	0.01003	0.01052
27.942	0.02451			27.966	0.00994	0.0102
27.966	0.02536			27.991	0.01003	0.0098
27.991	0.02612			28.015	0.00979	0.00957
28.015	0.02552			28.04	0.00889	0.0096
28.04	0.02373			28.064	0.00769	0.00987
28.064	0.02204			28.089	0.00697	0.01003
28.089	0.02155			28.113	0.00697	0.00976
28.113	0.02222			28.137	0.0073	0.00913
28.137	0.02301			28.162	0.00719	0.00851
28.162	0.02319			28.186	0.00636	0.0082
28.186	0.02276			28.211	0.00525	0.00817
28.211	0.02213			28.235	0.00483	0.00819
28.235	0.02148			28.259	0.00535	0.00799
28.259	0.02067			28.284	0.0062	0.00744
28.284	0.0194			28.308	0.00671	0.00663
28.308	0.01806			28.333	0.00684	0.00587
28.333	0.01764			28.357	0.00677	0.0054
28.357	0.01862			28.382	0.00628	0.00526
28.382	0.01982			28.406	0.00523	0.00519
28.406	0.01964			28.43	0.00394	0.00513
28.43	0.01808			28.455	0.0031	0.00512
28.455	0.01667			28.479	0.00302	0.00521
28.479	0.01637			28.504	0.00342	0.00528
28.504	0.01652			28.528	0.00378	0.00535
28.528	0.01643			28.553	0.00404	0.0054
28.553	0.01641			28.577	0.00443	0.00523
28.577	0.01688			28.601	0.00492	0.00476
28.601	0.01709			28.626	0.00503	0.00433
28.626	0.01641			28.65	0.00457	0.00426
28.65	0.01532			28.675	0.0039	0.00442
28.675	0.01467			28.699	0.0034	0.00435
28.699	0.01439			28.723	0.00297	0.00386
28.723	0.01414			28.748	0.00256	0.00335
28.748	0.01401			28.772	0.00245	0.00331
28.772	0.01418			28.797	0.00279	0.00378
28.797	0.01457			28.821	0.00319	0.00432
28.821	0.01485			28.846	0.00331	0.00444
28.846	0.0145			28.87	0.0032	0.00396
28.87	0.01316			28.894	0.0031	0.00312
28.894	0.01135			28.919	0.00295	0.00233
28.919	0.01028			28.943	0.00257	0.00191
28.943	0.01046			28.968	0.00207	0.00185
28.968	0.01114			28.992	0.00182	0.00205
28.992	0.01138			29.017	0.00194	0.0024
29.017	0.01117			29.041	0.00211	0.00272
29.041	0.01101			29.065	0.00202	0.00284
29.065	0.01104			29.09	0.00179	0.00277
29.09	0.01095			29.114	0.00171	0.00264
29.114	0.01056			29.139	0.0018	0.0025
29.139	0.01017			29.163	0.00186	0.00229
29.163	0.01007			29.187	0.0018	0.00211
29.187	0.0101			29.212	0.00172	0.00213
29.212	0.00981			29.236	0.00161	0.00225
29.236	0.00925			29.261	0.00141	0.00214
29.261	0.00893			29.285	0.00118	0.00172
29.285	0.00919			29.31	0.00107	0.00127
29.31	0.00954			29.334	0.0012	0.00105
29.334	0.00923			29.358	0.00146	0.00108
29.358	0.00809			29.383	0.00151	0.00136
29.383	0.00671			29.407	0.00119	0.00182
29.407	0.00588			29.432	0.00074	0.0021
29.432	0.00597			29.456	0.00057	0.00187
29.456	0.00687			29.481	0.00071	0.00132
29.481	0.00803			29.505	0.00086	0.00087
29.505	0.00874			29.529	0.00088	0.00076
29.529	0.00855			29.554	0.00083	0.00089
29.554	0.00776			29.578	0.00083	0.00117
29.578	0.00713			29.603	0.00084	0.00146
29.603	0.00698			29.627	0.00079	0.00146
29.627	0.00689			29.651	0.00063	0.00106
29.651	0.00654			29.676	0.00045	0.00055
29.676	0.00615			29.7	0.00036	0.00035
29.7	0.00597			29.725	0.00033	0.00046
29.725	0.00587			29.749	0.00024	0.00058
29.749	0.0057			29.774	9e-05	0.00053
29.774	0.00559			29.798	4e-05	0.00043
29.798	0.00568			29.822	0.00018	0.00041
29.822	0.00573			29.847	0.00038	0.00044
29.847	0.00536			29.871	0.00044	0.00038
29.871	0.00457			29.896	0.00034	0.00023
29.896	0.00383			29.92	0.00022	0.0001
29.92	0.00384			29.945	0.00016	6e-05
29.945	0.00468			29.969	0.00013	8e-05
29.969	0.00564			29.993	0.00013	0.00012
29.993	0.0058			30.018	0.00022	0.00015
30.018	0.00525			30.042	0.00038	0.00018
30.042	0.0049			30.067	0.00046	0.00025
30.067	0.00519			30.091	0.00037	0.00037
30.091	0.00551			30.115	0.00024	0.00046
30.115	0.00524			30.14	0.00021	0.00046
30.14	0.00472			30.164	0.00027	0.00045
30.164	0.00455			30.189	0.00026	0.00052
30.189	0.00471			30.213	0.00016	0.00062
30.213	0.00459			30.238	7e-05	0.00062
30.238	0.00404			30.262	0.00013	0.00048
30.262	0.00353			30.286	0.0003	0.0003
30.286	0.00343			30.311	0.00046	0.00018
30.311	0.00351			30.335	0.00053	0.00017
30.335	0.00332			30.36	0.00049	0.00025
30.36	0.00289			30.384	0.00037	0.0003
30.384	0.0027			30.409	0.00021	0.00025
30.409	0.00307			30.433	8e-05	0.00025
30.433	0.00369			30.457	0	0.00045
30.457	0.00404			30.482	0	0.00073
30.482	0.00385			30.506	0	0.00082
30.506	0.00334			30.531	0	0.00066
30.531	0.00289			30.555	0	0.00046
30.555	0.0029			30.579	3e-05	0.00034
30.579	0.00347			30.604	7e-05	0.00025
30.604	0.00427			30.628	9e-05	0.00012
30.628	0.00464			30.653	0.0001	1e-05
30.653	0.00426			30.677	0.00012	0
30.677	0.00335			30.702	0.00015	0
30.702	0.0024			30.726	0.00017	0
30.726	0.0018			30.75	0.00024	1e-05
30.75	0.0017			30.775	0.00038	4e-05
30.775	0.00195			30.799	0.00051	0.00013
30.799	0.00218			30.824	0.00051	0.00031
30.824	0.00219			30.848	0.00039	0.0005
30.848	0.00209			30.872	0.00027	0.00054
30.872	0.00205			30.897	0.0002	0.00041
30.897	0.00209			30.921	0.00015	0.00024
30.921	0.00218			30.946	8e-05	0.00018
30.946	0.00225			30.97	4e-05	0.0002
30.97	0.00222			30.995	0.0001	0.00026
30.995	0.00206			31.019	0.00024	0.00039
31.019	0.002			31.043	0.00046	0.00052
31.043	0.00223			31.068	0.00069	0.00051
31.068	0.00256			31.092	0.00078	0.00033
31.092	0.00266			31.117	0.00061	0.00018
31.117	0.00256			31.141	0.0003	0.00023
31.141	0.00257			31.166	0.0001	0.00045
31.166	0.00264			31.19	0.00013	0.00062
31.19	0.00236			31.214	0.00033	0.00055
31.214	0.00164			31.239	0.00053	0.00028
31.239	0.00104			31.263	0.0006	6e-05
31.263	0.00104			31.288	0.00055	0.00016
31.288	0.00141			31.312	0.00049	0.00058
31.312	0.00167			31.336	0.00051	0.00096
31.336	0.00171			31.361	0.00051	0.00096
31.361	0.00177			31.385	0.00041	0.0006
31.385	0.00184			31.41	0.00026	0.00026
31.41	0.00169			31.434	0.0002	0.0002
31.434	0.00132			31.459	0.00031	0.00043
31.459	0.00111			31.483	0.0005	0.00071
31.483	0.00137			31.507	0.00058	0.00083
31.507	0.00187			31.532	0.00047	0.00075
31.532	0.00215			31.556	0.00031	0.0006
31.556	0.00207			31.581	0.00028	0.00047
31.581	0.00179			31.605	0.00046	0.0004
31.605	0.0015			31.63	0.00072	0.00042
31.63	0.00123			31.654	0.00086	0.00054
31.654	0.001			31.678	0.00076	0.00069
31.678	0.00083			31.703	0.00051	0.00081
31.703	0.00068			31.727	0.0003	0.00082
31.727	0.00056			31.752	0.00026	0.00068
31.752	0.00054			31.776	0.00033	0.00039
31.776	0.00067			31.8	0.00044	0.00011
31.8	0.00088			31.825	0.00053	4e-05
31.825	0.001			31.849	0.00054	0.00019
31.849	0.00092			31.874	0.00048	0.00036
31.874	0.00079			31.898	0.00041	0.00038
31.898	0.00086			31.923	0.00042	0.0003
31.923	0.00114			31.947	0.00045	0.00028
31.947	0.00141			31.971	0.00039	0.00039
31.971	0.00148			31.996	0.00022	0.00054
31.996	0.00138			32.02	9e-05	0.00059
32.02	0.00119			32.045	0.00014	0.00055
32.045	0.00101			32.069	0.0004	0.00049
32.069	0.00105			32.094	0.00068	0.00041
32.094	0.0014			32.118	0.00072	0.00027
32.118	0.00174			32.142	0.0005	0.00013
32.142	0.00171			32.167	0.00027	0.00012
32.167	0.00133			32.191	0.0003	0.00022
32.191	0.00095			32.216	0.00056	0.00032
32.216	0.00072			32.24	0.00078	0.00036
32.24	0.0006			32.264	0.00076	0.00036
32.264	0.00055			32.289	0.00061	0.00038
32.289	0.00063			32.313	0.00052	0.00043
32.313	0.00078			32.338	0.00058	0.00049
32.338	0.00082			32.362	0.00063	0.00052
32.362	0.0007			32.387	0.00053	0.00049
32.387	0.00058			32.411	0.00029	0.00043
32.411	0.00056			32.435	0.0001	0.00036
32.435	0.00061			32.46	0.0001	0.00027
32.46	0.0007			32.484	0.00029	0.00026
32.484	0.00086			32.509	0.00044	0.00041
32.509	0.001			32.533	0.00043	0.0006
32.533	0.00094			32.558	0.00038	0.00063
32.558	0.00072			32.582	0.00046	0.00052
32.582	0.00055			32.606	0.00066	0.00044
32.606	0.00057			32.631	0.00074	0.00053
32.631	0.00066			32.655	0.00057	0.00066
32.655	0.0007			32.68	0.00028	0.00064
32.68	0.00065			32.704	0.0001	0.00048
32.704	0.0006			32.728	8e-05	0.00044
32.728	0.00064			32.753	0.00015	0.00066
32.753	0.00072			32.777	0.00022	0.00084
32.777	0.00082			32.802	0.00028	0.00067
32.802	0.00089			32.826	0.0003	0.00031
32.826	0.00091			32.851	0.0003	0.00017
32.851	0.00082			32.875	0.00027	0.00035
32.875	0.00065			32.899	0.00023	0.00058
32.899	0.00057			32.924	0.00022	0.00065
32.924	0.0007			32.948	0.00025	0.00067
32.948	0.00093			32.973	0.00034	0.00079
32.973	0.00112			32.997	0.00047	0.00093
32.997	0.00116			33.022	0.00052	0.00095
33.022	0.00113			33.046	0.0004	0.00081
33.046	0.00111			33.07	0.0002	0.00057
33.07	0.00112			33.095	7e-05	0.00039
33.095	0.00109			33.119	0.0001	0.00034
33.119	0.00103			33.144	0.00027	0.00042
33.144	0.00103			33.168	0.00045	0.00057
33.168	0.00114			33.192	0.00054	0.00073
33.192	0.00118			33.217	0.00052	0.00086
33.217	0.00105			33.241	0.00046	0.0009
33.241	0.00083			33.266	0.00042	0.00083
33.266	0.00068			33.29	0.00042	0.00075
33.29	0.00071			33.315	0.00045	0.00076
33.315	0.00089			33.339	0.00047	0.00082
33.339	0.00104			33.363	0.00051	0.00081
33.363	0.00102			33.388	0.00058	0.00065
33.388	0.00086			33.412	0.00064	0.00044
33.412	0.00075			33.437	0.00062	0.00029
33.437	0.00076			33.461	0.00057	0.00028
33.461	0.00083			33.486	0.0005	0.00041
33.486	0.00087			33.51	0.00042	0.00057
33.51	0.00086			33.534	0.00032	0.00057
33.534	0.00079			33.559	0.0003	0.00041
33.559	0.00071			33.583	0.00044	0.0003
33.583	0.00073			33.608	0.00072	0.00049
33.608	0.00087			33.632	0.00091	0.00091
33.632	0.001			33.656	0.00084	0.00127
33.656	0.00095			33.681	0.00059	0.00125
33.681	0.00076			33.705	0.00048	0.00084
33.705	0.00066			33.73	0.00063	0.00035
33.73	0.00075			33.754	0.00083	8e-05
33.754	0.00083			33.779	0.00079	0.0001
33.779	0.0007			33.803	0.00055	0.0003
33.803	0.0005			33.827	0.00033	0.00053
33.827	0.00051			33.852	0.00033	0.00076
33.852	0.00074			33.876	0.00057	0.00094
33.876	0.00093			33.901	0.00089	0.00101
33.901	0.001			33.925	0.00108	0.00099
33.925	0.00106			33.95	0.00103	0.00091
33.95	0.00113			33.974	0.00078	0.00077
33.974	0.00101			33.998	0.0006	0.00055
33.998	0.00071			34.023	0.00066	0.00035
34.023	0.00053			34.047	0.00084	0.00028
34.047	0.00068			34.072	0.00087	0.00037
34.072	0.00099			34.096	0.00071	0.0005
34.096	0.00119			34.12	0.00053	0.0006
34.12	0.00125			34.145	0.00045	0.00074
34.145	0.00123			34.169	0.00042	0.00096
34.169	0.0011			34.194	0.00038	0.00111
34.194	0.00088			34.218	0.0004	0.00114
34.218	0.00071			34.243	0.00056	0.00118
34.243	0.00077			34.267	0.00079	0.00136
34.267	0.00104			34.291	0.001	0.00153
34.291	0.00128			34.316	0.0011	0.00153
34.316	0.00127			34.34	0.00106	0.00136
34.34	0.00107			34.365	0.00091	0.00118
34.365	0.00096			34.389	0.00078	0.00099
34.389	0.00105			34.414	0.00082	0.00078
34.414	0.00115			34.438	0.00101	0.00066
34.438	0.00103			34.462	0.00107	0.00081
34.462	0.00081			34.487	0.00088	0.00115
34.487	0.00087			34.511	0.00066	0.00138
34.511	0.00134			34.536	0.00066	0.00132
34.536	0.00185			34.56	0.00083	0.00114
34.56	0.00191			34.584	0.00094	0.00109
34.584	0.0015			34.609	0.0009	0.00122
34.609	0.00106			34.633	0.00078	0.00145
34.633	0.00099			34.658	0.00071	0.00164
34.658	0.00117			34.682	0.00075	0.00164
34.682	0.00122			34.707	0.00089	0.00144
34.707	0.00104			34.731	0.00102	0.00114
34.731	0.00087			34.755	0.00101	0.00087
34.755	0.00092			34.78	0.00089	0.00064
34.78	0.00119			34.804	0.00079	0.00047
34.804	0.0015			34.829	0.00077	0.00046
34.829	0.00174			34.853	0.0008	0.00066
34.853	0.00192			34.878	0.00081	0.00099
34.878	0.00202			34.902	0.0008	0.00129
34.902	0.002			34.926	0.00085	0.00146
34.926	0.00185			34.951	0.00098	0.00153
34.951	0.00161			34.975	0.00114	0.00155
34.975	0.00138			35	0.00122	0.0015
35	0.0013			35.024	0.00116	0.00144
35.024	0.00145			35.048	0.001	0.00145
35.048	0.00182			35.073	0.00084	0.0015
35.073	0.00217			35.097	0.00076	0.00155
35.097	0.00221			35.122	0.0008	0.00164
35.122	0.00186			35.146	0.00095	0.00174
35.146	0.00138			35.171	0.00117	0.00164
35.171	0.00113			35.195	0.00133	0.00117
35.195	0.00126			35.219	0.00134	0.00061
35.219	0.00151			35.244	0.00127	0.00044
35.244	0.00148			35.268	0.00125	0.00078
35.268	0.00107			35.293	0.00126	0.00119
35.293	0.00065			35.317	0.00118	0.0013
35.317	0.00059			35.342	0.001	0.00117
35.342	0.00091			35.366	0.00086	0.00113
35.366	0.00135			35.39	0.00085	0.00118
35.39	0.00169			35.415	0.00097	0.00115
35.415	0.00178			35.439	0.00118	0.00099
35.439	0.00162			35.464	0.00148	0.00089
35.464	0.00137			35.488	0.00169	0.00097
35.488	0.00124			35.512	0.00157	0.00114
35.512	0.00128			35.537	0.00117	0.00125
35.537	0.00143			35.561	0.00091	0.00127
35.561	0.00163			35.586	0.00099	0.00126
35.586	0.00182			35.61	0.00117	0.00122
35.61	0.00194			35.635	0.00116	0.00106
35.635	0.00191			35.659	0.00097	0.00088
35.659	0.00179			35.683	0.00077	0.00084
35.683	0.00166			35.708	0.00059	0.00101
35.708	0.00161			35.732	0.00049	0.00115
35.732	0.0016			35.757	0.00063	0.00111
35.757	0.00155			35.781	0.0009	0.00101
35.781	0.00147			35.806	0.00101	0.00109
35.806	0.00145			35.83	0.00085	0.00138
35.83	0.00144			35.854	0.00068	0.00163
35.854	0.00143			35.879	0.00075	0.0016
35.879	0.00161			35.903	0.001	0.00138
35.903	0.00216			35.928	0.00127	0.00132
35.928	0.00282			35.952	0.00149	0.00148
35.952	0.003			35.976	0.00169	0.00158
35.976	0.00253			36.001	0.00181	0.00145
36.001	0.00178			36.025	0.00184	0.00128
36.025	0.00129			36.05	0.0018	0.00129
36.05	0.00126			36.074	0.00174	0.00146
36.074	0.00155			36.099	0.00169	0.00172
36.099	0.00194			36.123	0.00164	0.00203
36.123	0.00232			36.147	0.00143	0.00224
36.147	0.00263			36.172	0.00108	0.00223
36.172	0.00285			36.196	0.00085	0.00209
36.196	0.00302			36.221	0.00098	0.002
36.221	0.00315			36.245	0.00128	0.00194
36.245	0.00307			36.27	0.00134	0.00181
36.27	0.0027			36.294	0.00112	0.00162
36.294	0.00222			36.318	0.00093	0.00145
36.318	0.00193			36.343	0.00094	0.00138
36.343	0.00188			36.367	0.00105	0.00145
36.367	0.00189			36.392	0.00117	0.00163
36.392	0.00192			36.416	0.00135	0.00184
36.416	0.00211			36.44	0.00154	0.0021
36.44	0.00244			36.465	0.00156	0.00242
36.465	0.00269			36.489	0.00143	0.00256
36.489	0.00266			36.514	0.0014	0.00226
36.514	0.00238			36.538	0.00161	0.00161
36.538	0.00215			36.563	0.00186	0.00109
36.563	0.00225			36.587	0.00185	0.00109
36.587	0.00265			36.611	0.00157	0.0015
36.611	0.00286			36.636	0.00133	0.00181
36.636	0.0025			36.66	0.00139	0.00174
36.66	0.00186			36.685	0.00165	0.00153
36.685	0.00157			36.709	0.00178	0.00157
36.709	0.00188			36.734	0.00176	0.00176
36.734	0.00245			36.758	0.00187	0.00167
36.758	0.0027			36.782	0.00219	0.00127
36.782	0.00243			36.807	0.00239	0.00105
36.807	0.00192			36.831	0.00217	0.00128
36.831	0.00175			36.856	0.00155	0.00162
36.856	0.00221			36.88	0.00101	0.0016
36.88	0.00302			36.904	0.00098	0.00132
36.904	0.00368			36.929	0.00152	0.00126
36.929	0.00397			36.953	0.00209	0.00166
36.953	0.00409			36.978	0.00221	0.00224
36.978	0.00418			37.002	0.00178	0.00254
37.002	0.00414			37.027	0.00124	0.00241
37.027	0.00383			37.051	0.00104	0.00201
37.051	0.00337			37.075	0.00131	0.00174
37.075	0.00293			37.1	0.00167	0.00182
37.1	0.00267			37.124	0.00166	0.00211
37.124	0.00259			37.149	0.0013	0.00219
37.149	0.00254			37.173	0.00106	0.002
37.173	0.00243			37.198	0.00116	0.00182
37.198	0.00238			37.222	0.00147	0.00188
37.222	0.00264			37.246	0.00169	0.00201
37.246	0.00303			37.271	0.00169	0.00212
37.271	0.00312			37.295	0.00151	0.00226
37.295	0.00267			37.32	0.00135	0.00239
37.32	0.00208			37.344	0.00145	0.00237
37.344	0.00186			37.368	0.00184	0.00221
37.368	0.00206			37.393	0.00231	0.00203
37.393	0.00238			37.417	0.00255	0.00189
37.417	0.00267			37.442	0.00244	0.00179
37.442	0.00286			37.466	0.00207	0.00192
37.466	0.00284			37.491	0.00179	0.00239
37.491	0.00259			37.515	0.0018	0.0029
37.515	0.00222			37.539	0.00199	0.00298
37.539	0.00189			37.564	0.00202	0.00249
37.564	0.00174			37.588	0.00191	0.00186
37.588	0.00193			37.613	0.00188	0.00163
37.613	0.00253			37.637	0.00205	0.00195
37.637	0.00332			37.662	0.00221	0.00242
37.662	0.0039			37.686	0.00219	0.0025
37.686	0.00403			37.71	0.00202	0.00206
37.71	0.0038			37.735	0.00188	0.00153
37.735	0.00335			37.759	0.00186	0.0014
37.759	0.00294			37.784	0.00192	0.00169
37.784	0.00279			37.808	0.00195	0.00195
37.808	0.00298			37.832	0.00192	0.00191
37.832	0.00325			37.857	0.00186	0.0017
37.857	0.00326			37.881	0.00177	0.00165
37.881	0.00293			37.906	0.00174	0.00183
37.906	0.00259			37.93	0.00182	0.00213
37.93	0.00244			37.955	0.00195	0.0024
37.955	0.00238			37.979	0.00195	0.00268
37.979	0.00222			38.003	0.00182	0.00289
38.003	0.0021			38.028	0.00166	0.00284
38.028	0.00237			38.052	0.00158	0.0025
38.052	0.00301			38.077	0.00167	0.00214
38.077	0.00342			38.101	0.00197	0.00199
38.101	0.00315			38.126	0.00221	0.002
38.126	0.00268			38.15	0.00203	0.00201
38.15	0.0028			38.174	0.00155	0.00209
38.174	0.00341			38.199	0.00122	0.00236
38.199	0.00382			38.223	0.00126	0.00275
38.223	0.0038			38.248	0.00151	0.00304
38.248	0.00364			38.272	0.00185	0.00316
38.272	0.0034			38.296	0.0023	0.00326
38.296	0.00304			38.321	0.00274	0.00353
38.321	0.00281			38.345	0.00284	0.00386
38.345	0.00279			38.37	0.00253	0.0039
38.37	0.00277			38.394	0.00202	0.00349
38.394	0.00276			38.419	0.00168	0.00286
38.419	0.00302			38.443	0.00161	0.00236
38.443	0.00334			38.467	0.00171	0.00223
38.467	0.00332			38.492	0.0018	0.00258
38.492	0.00301			38.516	0.00193	0.00319
38.516	0.00286			38.541	0.00216	0.00356
38.541	0.00299			38.565	0.0024	0.00336
38.565	0.00318			38.59	0.00231	0.0028
38.59	0.00323			38.614	0.00187	0.00234
38.614	0.00313			38.638	0.00154	0.00213
38.638	0.00308			38.663	0.00168	0.00201
38.663	0.00338			38.687	0.00201	0.00191
38.687	0.00405			38.712	0.00206	0.00211
38.712	0.00456			38.736	0.00179	0.00278
38.736	0.00455			38.76	0.00165	0.00361
38.76	0.00432			38.785	0.00187	0.00394
38.785	0.00436			38.809	0.00225	0.00362
38.809	0.00456			38.834	0.00245	0.00304
38.834	0.00451			38.858	0.00229	0.00263
38.858	0.00422			38.883	0.00184	0.00238
38.883	0.00401			38.907	0.00153	0.00217
38.907	0.00399			38.931	0.00182	0.00213
38.931	0.00393			38.956	0.00261	0.0024
38.956	0.00362			38.98	0.00322	0.00272
38.98	0.00324			39.005	0.00316	0.00273
39.005	0.00327			39.029	0.0026	0.0026
39.029	0.00379			39.054	0.00205	0.00268
39.054	0.00432			39.078	0.00182	0.00293
39.078	0.00435			39.102	0.00196	0.00305
39.102	0.00414			39.127	0.00234	0.00296
39.127	0.0041			39.151	0.00264	0.00285
39.151	0.00416			39.176	0.00249	0.00283
39.176	0.00396			39.2	0.00193	0.00299
39.2	0.00362			39.224	0.00142	0.00333
39.224	0.00346			39.249	0.00133	0.00363
39.249	0.00354			39.273	0.00151	0.00345
39.273	0.00366			39.298	0.00167	0.00281
39.298	0.00383			39.322	0.00185	0.00226
39.322	0.00413			39.347	0.00216	0.0024
39.347	0.00437			39.371	0.00251	0.00313
39.371	0.00418			39.395	0.00277	0.00389
39.395	0.00368			39.42	0.00297	0.00408
39.42	0.00329			39.444	0.00313	0.00368
39.444	0.00319			39.469	0.00306	0.00302
39.469	0.00323			39.493	0.00259	0.0025
39.493	0.0034			39.518	0.00203	0.00219
39.518	0.00384			39.542	0.00182	0.00213
39.542	0.0043			39.566	0.00201	0.00241
39.566	0.00442			39.591	0.00218	0.00303
39.591	0.0042			39.615	0.00211	0.00355
39.615	0.004			39.64	0.00203	0.0036
39.64	0.00397			39.664	0.00226	0.00323
39.664	0.00404			39.688	0.00261	0.00283
39.688	0.004			39.713	0.00271	0.00254
39.713	0.00375			39.737	0.0025	0.00242
39.737	0.00331			39.762	0.00222	0.00248
39.762	0.00306			39.786	0.00202	0.00258
39.786	0.00338			39.811	0.00182	0.00245
39.811	0.00421			39.835	0.00162	0.00217
39.835	0.00505			39.859	0.00159	0.00214
39.859	0.00537			39.884	0.00171	0.00253
39.884	0.00509			39.908	0.00171	0.00303
39.908	0.00456			39.933	0.00153	0.00332
39.933	0.0041			39.957	0.00142	0.00332
39.957	0.00373			39.982	0.00162	0.00308
39.982	0.00359			40.006	0.00195	0.00265
40.006	0.0039			40.03	0.00212	0.00214
40.03	0.00444			40.055	0.00212	0.00183
40.055	0.00461			40.079	0.00211	0.0019
40.079	0.00428			40.104	0.00209	0.00219
40.104	0.00394			40.128	0.00201	0.00227
40.128	0.00394			40.152	0.00193	0.00201
40.152	0.0042			40.177	0.00191	0.00183
40.177	0.00455			40.201	0.00202	0.00214
40.201	0.00489			40.226	0.00229	0.00274
40.226	0.005			40.25	0.00261	0.00312
40.25	0.0049			40.275	0.00265	0.00321
40.275	0.0048			40.299	0.0022	0.00335
40.299	0.00483			40.323	0.00155	0.00362
40.323	0.00471			40.348	0.00128	0.00374
40.348	0.00443			40.372	0.00164	0.00348
40.372	0.00431			40.397	0.00234	0.00311
40.397	0.00462			40.421	0.00292	0.00304
40.421	0.00505			40.446	0.00327	0.00342
40.446	0.00522			40.47	0.00351	0.00405
40.47	0.00508			40.494	0.00365	0.00446
40.494	0.00496			40.519	0.00355	0.00418
40.519	0.00502			40.543	0.00321	0.00335
40.543	0.0051			40.568	0.00284	0.00271
40.568	0.00496			40.592	0.00255	0.0028
40.592	0.00466			40.616	0.00237	0.00328
40.616	0.00448			40.641	0.00234	0.00354
40.641	0.00451			40.665	0.00244	0.0035
40.665	0.00443			40.69	0.00248	0.00346
40.69	0.00402			40.714	0.00248	0.00348
40.714	0.00366			40.739	0.00261	0.00336
40.739	0.00381			40.763	0.00295	0.00311
40.763	0.00437			40.787	0.0032	0.00288
40.787	0.00476			40.812	0.0031	0.00277
40.812	0.00454			40.836	0.00273	0.00272
40.836	0.00395			40.861	0.00238	0.00264
40.861	0.00356			40.885	0.00221	0.00252
40.885	0.0037			40.91	0.00227	0.00253
40.91	0.00403			40.934	0.00242	0.00275
40.934	0.00405			40.958	0.00243	0.00296
40.958	0.00369			40.983	0.00219	0.00291
40.983	0.0034			41.007	0.00198	0.00282
41.007	0.00341			41.032	0.00216	0.00306
41.032	0.00361			41.056	0.00265	0.00348
41.056	0.00387			41.08	0.003	0.00352
41.08	0.00423			41.105	0.00303	0.00304
41.105	0.00476			41.129	0.00298	0.00255
41.129	0.00543			41.154	0.00303	0.00254
41.154	0.00588			41.178	0.0029	0.00293
41.178	0.00559			41.203	0.00243	0.00337
41.203	0.00475			41.227	0.00197	0.00371
41.227	0.0043			41.251	0.00209	0.00393
41.251	0.00492			41.276	0.00276	0.00394
41.276	0.00594			41.3	0.00336	0.00366
41.3	0.00645			41.325	0.00341	0.00336
41.325	0.00611			41.349	0.00313	0.00326
41.349	0.00532			41.374	0.00297	0.00327
41.374	0.00464			41.398	0.003	0.00308
41.398	0.00462			41.422	0.00295	0.00265
41.422	0.00537			41.447	0.00276	0.00217
41.447	0.00634			41.471	0.00271	0.00196
41.471	0.00675			41.496	0.00287	0.00218
41.496	0.00644			41.52	0.00288	0.00282
41.52	0.00589			41.544	0.00254	0.00348
41.544	0.00559			41.569	0.00225	0.0037
41.569	0.0055			41.593	0.00253	0.00329
41.593	0.00528			41.618	0.00324	0.0026
41.618	0.00479			41.642	0.00361	0.00215
41.642	0.00421			41.667	0.00334	0.00224
41.667	0.00386			41.691	0.00292	0.00274
41.691	0.00389			41.715	0.00295	0.00319
41.715	0.00427			41.74	0.00334	0.00326
41.74	0.00474			41.764	0.0036	0.00305
41.764	0.00493			41.789	0.00354	0.00283
41.789	0.00467			41.813	0.00337	0.00283
41.813	0.00423			41.838	0.00326	0.00316
41.838	0.00392			41.862	0.00315	0.00374
41.862	0.00372			41.886	0.00301	0.00414
41.886	0.00353			41.911	0.00288	0.00402
41.911	0.00355			41.935	0.0028	0.00358
41.935	0.00401			41.96	0.00277	0.00332
41.96	0.00475			41.984	0.00275	0.00342
41.984	0.00521			42.008	0.00265	0.0037
42.008	0.00509			42.033	0.00254	0.00395
42.033	0.00468			42.057	0.00271	0.00389
42.057	0.00455			42.082	0.00316	0.00335
42.082	0.00489			42.106	0.00338	0.00271
42.106	0.00542			42.131	0.00299	0.00257
42.131	0.0057			42.155	0.00238	0.00287
42.155	0.00549			42.179	0.00224	0.00303
42.179	0.00491			42.204	0.00262	0.00283
42.204	0.00454			42.228	0.003	0.00279
42.228	0.00474			42.253	0.00302	0.00319
42.253	0.00514			42.277	0.0028	0.00358
42.277	0.005			42.302	0.00263	0.00341
42.302	0.00447			42.326	0.00274	0.00285
42.326	0.00431			42.35	0.00312	0.00262
42.35	0.00483			42.375	0.00348	0.00299
42.375	0.0054			42.399	0.00347	0.0035
42.399	0.00536			42.424	0.00306	0.00367
42.424	0.00462			42.448	0.00263	0.00362
42.448	0.00375			42.472	0.00252	0.0037
42.472	0.00342			42.497	0.00263	0.00381
42.497	0.00389			42.521	0.00265	0.00359
42.521	0.00468			42.546	0.00248	0.00312
42.546	0.00507			42.57	0.00232	0.00289
42.57	0.00487			42.595	0.0024	0.00314
42.595	0.00456			42.619	0.00263	0.00347
42.619	0.00447			42.643	0.0027	0.00329
42.643	0.00454			42.668	0.00251	0.00258
42.668	0.00457			42.692	0.0023	0.00193
42.692	0.00453			42.717	0.00239	0.0019
42.717	0.00437			42.741	0.00282	0.00249
42.741	0.00417			42.765	0.00325	0.00315
42.765	0.00418			42.79	0.00345	0.00332
42.79	0.00456			42.814	0.00345	0.00308
42.814	0.00498			42.839	0.00343	0.00296
42.839	0.00497			42.863	0.00329	0.0033
42.863	0.0046			42.888	0.0029	0.00385
42.888	0.00445			42.912	0.00244	0.00408
42.912	0.00483			42.936	0.00216	0.00374
42.936	0.00535			42.961	0.00207	0.00313
42.961	0.00547			42.985	0.00206	0.00275
42.985	0.00523			43.01	0.0022	0.00272
43.01	0.00509			43.034	0.00254	0.00274
43.034	0.00515			43.059	0.00285	0.00261
43.059	0.00503			43.083	0.00286	0.00251
43.083	0.00463			43.107	0.0026	0.00262
43.107	0.00437			43.132	0.00225	0.00279
43.132	0.00453			43.156	0.00195	0.00282
43.156	0.0048			43.181	0.00178	0.00273
43.181	0.0048			43.205	0.00189	0.00261
43.205	0.00461			43.229	0.00217	0.00253
43.229	0.0044			43.254	0.00235	0.00257
43.254	0.00405			43.278	0.0022	0.00282
43.278	0.00355			43.303	0.00187	0.00321
43.303	0.00322			43.327	0.00164	0.00351
43.327	0.00334			43.352	0.00167	0.00352
43.352	0.0037			43.376	0.00189	0.00328
43.376	0.00403			43.4	0.00214	0.00295
43.4	0.00442			43.425	0.00228	0.00266
43.425	0.00509			43.449	0.00227	0.00248
43.449	0.00566			43.474	0.00209	0.00237
43.474	0.00556			43.498	0.00177	0.00221
43.498	0.00495			43.523	0.00159	0.00188
43.523	0.00459			43.547	0.00182	0.00163
43.547	0.00476			43.571	0.00235	0.00185
43.571	0.00501			43.596	0.00269	0.00257
43.596	0.00498			43.62	0.00245	0.00316
43.62	0.0047			43.645	0.00185	0.0031
43.645	0.00424			43.669	0.00144	0.00255
43.669	0.00376			43.693	0.00153	0.00205
43.693	0.00361			43.718	0.00188	0.00197
43.718	0.00404			43.742	0.00209	0.00219
43.742	0.00467			43.767	0.00201	0.00238
43.767	0.00488			43.791	0.00181	0.00233
43.791	0.0045			43.816	0.00171	0.00213
43.816	0.00409			43.84	0.00184	0.00202
43.84	0.00412			43.864	0.00217	0.00222
43.864	0.00456			43.889	0.00248	0.00277
43.889	0.00486			43.913	0.00255	0.00349
43.913	0.00475			43.938	0.00234	0.0039
43.938	0.00452			43.962	0.00209	0.00371
43.962	0.00467			43.987	0.00209	0.00314
43.987	0.00507			44.011	0.00231	0.00268
44.011	0.0051			44.035	0.00248	0.00248
44.035	0.0045			44.06	0.00249	0.00227
44.06	0.00381			44.084	0.0025	0.00191
44.084	0.00367			44.109	0.00264	0.00164
44.109	0.00401			44.133	0.00267	0.00174
44.133	0.0043			44.157	0.00252	0.0021
44.157	0.00422			44.182	0.00239	0.00246
44.182	0.00394			44.206	0.00244	0.0027
44.206	0.00376			44.231	0.00235	0.00282
44.231	0.0037			44.255	0.00194	0.00272
44.255	0.00356			44.28	0.00147	0.00238
44.28	0.00328			44.304	0.00143	0.00209
44.304	0.00329			44.328	0.00183	0.00215
44.328	0.004			44.353	0.00237	0.00243
44.353	0.00509			44.377	0.0027	0.00254
44.377	0.0056			44.402	0.00267	0.00237
44.402	0.0051			44.426	0.00235	0.00221
44.426	0.00418			44.451	0.00199	0.0023
44.451	0.00372			44.475	0.00177	0.00253
44.475	0.00383			44.499	0.00166	0.00262
44.499	0.00387			44.524	0.00156	0.00252
44.524	0.00342			44.548	0.00149	0.00244
44.548	0.00286			44.573	0.00154	0.00259
44.573	0.00294			44.597	0.00171	0.0029
44.597	0.00373			44.621	0.00194	0.0031
44.621	0.0044			44.646	0.00221	0.00296
44.646	0.00429			44.67	0.00243	0.00257
44.67	0.00371			44.695	0.00242	0.00222
44.695	0.00354			44.719	0.00205	0.00225
44.719	0.00412			44.744	0.00159	0.00279
44.744	0.00497			44.768	0.00135	0.00351
44.768	0.00533			44.792	0.00142	0.00371
44.792	0.00492			44.817	0.00163	0.00313
44.817	0.00403			44.841	0.0019	0.00234
44.841	0.00332			44.866	0.00222	0.002
44.866	0.00321			44.89	0.00243	0.00217
44.89	0.00362			44.915	0.00234	0.00244
44.915	0.00393			44.939	0.00209	0.00254
44.939	0.00366			44.963	0.00204	0.00248
44.963	0.003			44.988	0.00221	0.00226
44.988	0.00256			45.012	0.00222	0.00202
45.012	0.00266			45.037	0.00188	0.00203
45.037	0.00297			45.061	0.00152	0.00228
45.061	0.0032			45.085	0.00141	0.00244
45.085	0.00351			45.11	0.00144	0.00231
45.11	0.00399			45.134	0.00146	0.00214
45.134	0.00424			45.159	0.00158	0.00215
45.159	0.00393			45.183	0.00186	0.00223
45.183	0.00333			45.208	0.00204	0.00222
45.208	0.00291			45.232	0.00181	0.00217
45.232	0.00275			45.256	0.00136	0.00214
45.256	0.00283			45.281	0.00114	0.00208
45.281	0.00333			45.305	0.00131	0.00194
45.305	0.00424			45.33	0.00157	0.00183
45.33	0.00492			45.354	0.00165	0.00185
45.354	0.00489			45.379	0.00162	0.00194
45.379	0.00437			45.403	0.00168	0.00194
45.403	0.00391			45.427	0.00186	0.00184
45.427	0.00368			45.452	0.00199	0.00177
45.452	0.00354			45.476	0.00191	0.00178
45.476	0.00344			45.501	0.00164	0.00179
45.501	0.00341			45.525	0.0014	0.00177
45.525	0.00335			45.549	0.00135	0.00181
45.549	0.00319			45.574	0.00143	0.00192
45.574	0.00302			45.598	0.0015	0.00192
45.598	0.00305			45.623	0.00159	0.00171
45.623	0.00331			45.647	0.00173	0.00155
45.647	0.00354			45.672	0.00176	0.0017
45.672	0.0035			45.696	0.00151	0.00209
45.696	0.00328			45.72	0.00116	0.00231
45.72	0.00316			45.745	0.00114	0.0022
45.745	0.00321			45.769	0.00154	0.002
45.769	0.00318			45.794	0.00205	0.00206
45.794	0.00297			45.818	0.00224	0.00241
45.818	0.00277			45.843	0.00204	0.00271
45.843	0.0028			45.867	0.00174	0.00257
45.867	0.00298			45.891	0.00156	0.002
45.891	0.00308			45.916	0.00146	0.0014
45.916	0.00304			45.94	0.00134	0.0012
45.94	0.00295			45.965	0.00119	0.00134
45.965	0.00296			45.989	0.00108	0.0015
45.989	0.00316			46.013	0.0011	0.00147
46.013	0.00344			46.038	0.00124	0.00132
46.038	0.00359			46.062	0.00134	0.00125
46.062	0.0034			46.087	0.00129	0.00141
46.087	0.003			46.111	0.00114	0.00178
46.111	0.00276			46.136	0.00108	0.00203
46.136	0.0029			46.16	0.00112	0.00192
46.16	0.00323			46.184	0.00113	0.00158
46.184	0.00343			46.209	0.00104	0.00137
46.209	0.00342			46.233	0.00096	0.0014
46.233	0.00337			46.258	0.00097	0.00139
46.258	0.00331			46.282	0.001	0.00115
46.282	0.00302			46.307	0.001	0.0009
46.307	0.00243			46.331	0.00108	0.00098
46.331	0.00185			46.355	0.00132	0.00148
46.355	0.00168			46.38	0.00155	0.00198
46.38	0.00197			46.404	0.00155	0.00209
46.404	0.00235			46.429	0.00141	0.00184
46.429	0.00259			46.453	0.00138	0.00159
46.453	0.00268			46.477	0.00149	0.00154
46.477	0.00273			46.502	0.00148	0.0016
46.502	0.0028			46.526	0.00135	0.00167
46.526	0.00295			46.551	0.00135	0.0018
46.551	0.00321			46.575	0.00157	0.00204
46.575	0.00344			46.6	0.0017	0.00233
46.6	0.00342			46.624	0.00156	0.00242
46.624	0.00305			46.648	0.00132	0.00223
46.648	0.00243			46.673	0.00121	0.00192
46.673	0.00192			46.697	0.0012	0.0017
46.697	0.00184			46.722	0.00122	0.00157
46.722	0.00227			46.746	0.00132	0.00136
46.746	0.00278			46.771	0.00149	0.00107
46.771	0.00284			46.795	0.00154	0.00091
46.795	0.00241			46.819	0.00136	0.00104
46.819	0.00197			46.844	0.00106	0.00132
46.844	0.0019			46.868	0.00087	0.00152
46.868	0.00206			46.893	0.00087	0.00149
46.893	0.00207			46.917	0.00096	0.00131
46.917	0.00185			46.941	0.00097	0.00118
46.941	0.00167			46.966	0.00086	0.00123
46.966	0.00168			46.99	0.00085	0.0013
46.99	0.00177			47.015	0.00107	0.00127
47.015	0.00172			47.039	0.00132	0.00126
47.039	0.00162			47.064	0.00132	0.00141
47.064	0.00175			47.088	0.00106	0.00153
47.088	0.00222			47.112	0.00082	0.00144
47.112	0.00275			47.137	0.00083	0.00115
47.137	0.00301			47.161	0.00105	0.00091
47.161	0.00285			47.186	0.00126	0.00085
47.186	0.00247			47.21	0.00125	0.00099
47.21	0.00211			47.235	0.00105	0.00122
47.235	0.00188			47.259	0.00082	0.00143
47.259	0.00174			47.283	0.00075	0.00158
47.283	0.00167			47.308	0.00088	0.00164
47.308	0.00157			47.332	0.00114	0.00156
47.332	0.00136			47.357	0.00137	0.00142
47.357	0.00104			47.381	0.00142	0.0014
47.381	0.00079			47.405	0.00122	0.00151
47.405	0.00077			47.43	0.00091	0.0015
47.43	0.00098			47.454	0.0007	0.00125
47.454	0.00132			47.479	0.00069	0.0009
47.479	0.0017			47.503	0.00085	0.00071
47.503	0.00199			47.528	0.0011	0.00087
47.528	0.00204			47.552	0.00126	0.00132
47.552	0.00184			47.576	0.0012	0.00166
47.576	0.0015			47.601	0.00098	0.00164
47.601	0.00124			47.625	0.00085	0.0014
47.625	0.00127			47.65	0.00084	0.00121
47.65	0.00164			47.674	0.00081	0.00106
47.674	0.00206			47.699	0.0007	0.00082
47.699	0.00221			47.723	0.00061	0.00053
47.723	0.00207			47.747	0.00062	0.00044
47.747	0.00188			47.772	0.00066	0.00057
47.772	0.00177			47.796	0.00071	0.00072
47.796	0.00168			47.821	0.00081	0.00071
47.821	0.00149			47.845	0.00098	0.00056
47.845	0.00131			47.869	0.00105	0.00043
47.869	0.00128			47.894	0.00085	0.00044
47.894	0.00138			47.918	0.0005	0.00056
47.918	0.00145			47.943	0.00034	0.00072
47.943	0.0013			47.967	0.00053	0.00085
47.967	0.00102			47.992	0.00088	0.00086
47.992	0.0009			48.016	0.00107	0.00083
48.016	0.0011			48.04	0.00103	0.00093
48.04	0.00136			48.065	0.00095	0.00118
48.065	0.00133			48.089	0.00095	0.00135
48.089	0.00097			48.114	0.00091	0.00125
48.114	0.00064			48.138	0.00074	0.00092
48.138	0.00067			48.163	0.00058	0.00063
48.163	0.00103			48.187	0.00057	0.00051
48.187	0.00136			48.211	0.00061	0.00051
48.211	0.00137			48.236	0.00055	0.00051
48.236	0.00114			48.26	0.00042	0.00051
48.26	0.00097			48.285	0.00042	0.00058
48.285	0.00099			48.309	0.00055	0.00074
48.309	0.00112			48.333	0.00064	0.00087
48.333	0.00124			48.358	0.0006	0.00085
48.358	0.00138			48.382	0.0005	0.00079
48.382	0.00152			48.407	0.00046	0.00083
48.407	0.00154			48.431	0.00049	0.00094
48.431	0.00136			48.456	0.00055	0.00087
48.456	0.00123			48.48	0.00058	0.00065
48.48	0.00137			48.504	0.00059	0.00052
48.504	0.00169			48.529	0.0006	0.00062
48.529	0.00184			48.553	0.00058	0.00073
48.553	0.0017			48.578	0.00049	0.00065
48.578	0.00147			48.602	0.00041	0.00047
48.602	0.00135			48.627	0.00042	0.00039
48.627	0.00126			48.651	0.00048	0.00041
48.651	0.00106			48.675	0.00048	0.00047
48.675	0.00086			48.7	0.0004	0.00054
48.7	0.00084			48.724	0.00031	0.00066
48.724	0.00101			48.749	0.00025	0.00077
[truncated: 51 more rows]

## Sheet: Raw_Data_Figure_8_a_b
Raw_Data_Figure_8_b (TGA membranes)							Raw_Data_Figure_8_a (TGA TiO2 Nps)
PES Mass%	TFC Mass%	TFN Mass %	Temp. °C				TiO2 Mass/%	Temp. °C
100	100	99.983	30				99.661	29.634
102.441	101.333	101.034	36.8333				99.6606	29.635
102.402	101.309	100.227	43.6667				99.6602	29.636
102.441	101.24	99.4332	50.5				99.6598	29.639
102.487	101.157	98.8893	57.3333				99.6593	29.635
102.533	101.099	98.6485	64.1667				99.6589	29.639
102.611	101.076	98.6221	71				99.6585	29.639
102.706	101.099	98.6543	77.8333				99.6581	29.64
102.821	101.123	98.7133	84.6667				99.6577	29.641
102.922	101.191	98.7716	91.5				99.6574	29.642
103.012	101.262	98.8009	98.3333				99.6571	29.642
103.101	101.326	98.8885	105.167				99.6568	29.649
103.205	101.403	98.9696	112				99.6565	29.65
103.275	101.474	99.0698	118.833				99.6563	29.656
103.314	101.549	99.1836	125.667				99.656	29.66
103.359	101.623	99.2976	132.5				99.6557	29.665
103.406	101.696	99.4111	139.333				99.6555	29.672
103.489	101.754	99.5128	146.167				99.6553	29.68
103.566	101.823	99.5925	153				99.6551	29.687
103.635	101.884	99.6412	159.833				99.6549	29.699
103.722	101.939	99.7391	166.667				99.6547	29.71
103.757	101.974	99.8129	173.5				99.6545	29.719
103.838	102.035	99.8583	180.333				99.6543	29.729
103.886	102.08	99.9146	187.167				99.6541	29.74
103.93	102.104	99.9388	194				99.6539	29.749
103.93	102.128	99.973	200.833				99.6537	29.763
103.887	102.128	99.9736	207.667				99.6535	29.772
103.886	102.128	99.9443	214.5				99.6534	29.785
103.886	102.128	99.9443	221.333				99.6532	29.795
103.956	102.104	99.9443	228.167				99.653	29.804
104.012	102.104	99.9723	235				99.6528	29.816
104.104	102.104	99.9935	241.833				99.6526	29.826
104.148	102.128	100.032	248.667				99.6525	29.838
104.236	102.128	100.062	255.5				99.6523	29.85
104.317	102.128	100.061	262.333				99.6521	29.862
104.362	102.128	100.081	269.167				99.6519	29.874
104.397	102.128	100.113	276				99.6518	29.884
104.498	102.151	100.12	282.833				99.6516	29.896
104.578	102.151	100.12	289.667				99.6514	29.908
104.619	102.151	100.12	296.5				99.6512	29.918
104.629	102.151	100.179	303.333				99.651	29.929
104.648	102.174	100.179	310.167				99.6509	29.94
104.716	102.174	100.15	317				99.6507	29.951
104.758	102.174	100.179	323.833				99.6505	29.965
104.798	102.174	100.179	330.667				99.6503	29.977
104.845	102.174	100.18	337.5				99.6501	29.985
104.847	102.174	100.179	344.333				99.6499	29.994
104.891	102.174	100.179	351.167				99.6497	30.007
104.934	102.151	100.179	358				99.6495	30.02
104.978	102.129	100.151	364.833				99.6493	30.029
104.978	102.058	100.116	371.667				99.6491	30.042
105.022	102.016	100.033	378.5				99.6489	30.052
105.057	101.911	99.9103	385.333				99.6486	30.067
105.065	101.728	99.718	392.167				99.6484	30.076
105.065	101.457	99.4165	399				99.6482	30.091
105.078	101.018	98.9875	405.833				99.648	30.1
105.109	100.411	98.4156	412.667				99.6477	30.113
105.109	99.6371	97.7173	419.5				99.6475	30.124
105.022	98.7655	97.007	426.333				99.6472	30.135
104.978	97.9398	96.2719	433.167				99.647	30.146
104.935	97.1724	95.5654	440				99.6467	30.16
104.85	96.4186	94.8306	446.833				99.6465	30.17
104.716	95.6316	94.0409	453.667				99.6462	30.183
104.506	94.7569	93.1182	460.5				99.6459	30.192
104.206	93.7697	92.1071	467.333				99.6457	30.207
103.755	92.5965	90.8643	474.167				99.6454	30.217
103.217	91.2236	89.3378	481				99.6451	30.229
102.605	89.572	87.3795	487.833				99.6449	30.239
101.986	87.591	85.0022	494.667				99.6446	30.251
101.377	85.2238	82.059	501.5				99.6443	30.264
100.784	82.4888	78.7413	508.333				99.644	30.279
100.18	79.4432	75.2132	515.167				99.6437	30.289
99.5574	76.1857	71.7692	522				99.6434	30.301
98.8616	72.7329	68.519	528.833				99.6431	30.316
98.1318	69.0422	65.4391	535.667				99.6428	30.326
97.2716	65.0898	62.4147	542.5				99.6425	30.343
96.3038	61.0325	59.4628	549.333				99.6422	30.356
95.1724	57.1933	56.7266	556.167				99.6419	30.368
93.845	53.9383	54.5215	563				99.6416	30.38
92.2755	51.6536	53.001	569.833				99.6413	30.396
90.4756	50.3714	52.0002	576.667				99.641	30.406
88.3942	49.5478	51.2969	583.5				99.6407	30.42
86.039	48.8657	50.6919	590.333				99.6404	30.432
83.5882	48.1062	50.0836	597.167				99.6401	30.445
80.9834	47.4495	49.5439	604				99.6398	30.458
78.2683	46.8816	49.0333	610.833				99.6395	30.47
75.4407	46.3443	48.6072	617.667				99.6392	30.487
72.4374	46.0083	48.2495	624.5				99.6389	30.499
69.2289	45.6748	47.9436	631.333				99.6386	30.512
65.9578	45.3937	47.6964	638.167				99.6382	30.524
62.7538	45.1508	47.4577	645				99.6379	30.538
59.9221	44.9401	47.2606	651.833				99.6376	30.552
57.5876	44.7497	47.0912	658.667				99.6373	30.568
56.1416	44.5865	46.9337	665.5				99.6369	30.58
55.3099	44.4344	46.7612	672.333				99.6366	30.594
54.7734	44.2979	46.6565	679.167				99.6363	30.61
54.2348	44.1736	46.5291	686				99.6359	30.624
53.7528	44.0316	46.4127	692.833				99.6356	30.639
	43.9145	46.2652	699.667				99.6352	30.653
							99.6349	30.668
							99.6345	30.683
							99.6342	30.702
							99.6338	30.715
							99.6334	30.728
							99.6331	30.742
							99.6327	30.761
							99.6323	30.773
							99.6319	30.792
							99.6315	30.805
							99.6311	30.821
							99.6307	30.835
							99.6303	30.85
							99.6299	30.865
							99.6295	30.882
							99.6291	30.897
							99.6287	30.913
							99.6283	30.93
							99.6279	30.95
							99.6274	30.965
							99.627	30.98
							99.6266	30.999
							99.6262	31.017
							99.6257	31.033
							99.6253	31.049
							99.6249	31.068
							99.6245	31.087
							99.624	31.103
							99.6236	31.119
							99.6232	31.14
							99.6228	31.157
							99.6223	31.173
							99.6219	31.193
							99.6215	31.208
							99.621	31.227
							99.6206	31.245
							99.6202	31.263
							99.6198	31.282
							99.6193	31.301
							99.6189	31.319
							99.6185	31.34
							99.6181	31.357
							99.6176	31.378
							99.6172	31.396
							99.6168	31.418
							99.6164	31.436
							99.616	31.458
							99.6156	31.475
							99.6152	31.501
							99.6148	31.519
							99.6144	31.537
							99.614	31.556
							99.6136	31.578
							99.6132	31.598
							99.6128	31.618
							99.6124	31.638
							99.612	31.661
							99.6116	31.68
							99.6113	31.701
							99.6109	31.721
							99.6105	31.744
							99.6102	31.766
							99.6098	31.788
							99.6094	31.811
							99.6091	31.831
							99.6088	31.853
							99.6084	31.875
							99.6081	31.9
							99.6078	31.922
							99.6074	31.946
							99.6071	31.964
							99.6068	31.99
							99.6065	32.01
							99.6061	32.033
							99.6058	32.059
							99.6055	32.081
							99.6052	32.103
							99.6049	32.126
							99.6046	32.15
							99.6043	32.17
							99.604	32.193
							99.6037	32.222
							99.6034	32.244
							99.6031	32.27
							99.6028	32.294
							99.6025	32.322
							99.6022	32.343
							99.6019	32.367
							99.6016	32.395
							99.6013	32.419
							99.601	32.444
							99.6007	32.471
							99.6004	32.497
							99.6001	32.524
							99.5998	32.546
							99.5995	32.575
							99.5991	32.599
							99.5988	32.623
							99.5985	32.646
							99.5982	32.672
							99.5979	32.698
							99.5975	32.726
							99.5972	32.751
							99.5969	32.78
							99.5965	32.805
							99.5962	32.834
							99.5959	32.857
							99.5955	32.885
							99.5952	32.916
							99.5948	32.943
							99.5945	32.969
							99.5941	32.996
							99.5938	33.025
							99.5934	33.052
							99.5931	33.08
							99.5927	33.108
							99.5923	33.139
							99.592	33.166
							99.5916	33.195
							99.5912	33.22
							99.5908	33.247
							99.5904	33.276
							99.5901	33.303
							99.5897	33.33
							99.5893	33.361
							99.5889	33.39
							99.5885	33.418
							99.5881	33.446
							99.5877	33.48
							99.5873	33.508
							99.5868	33.538
							99.5864	33.569
							99.586	33.6
							99.5856	33.628
							99.5852	33.66
							99.5848	33.692
							99.5844	33.719
							99.5839	33.75
							99.5835	33.779
							99.5831	33.81
							99.5827	33.84
							99.5823	33.871
							99.5818	33.903
							99.5814	33.934
							99.581	33.96
							99.5806	33.994
							99.5802	34.023
							99.5797	34.054
							99.5793	34.088
							99.5789	34.118
							99.5785	34.149
							99.578	34.184
							99.5776	34.215
							99.5772	34.249
							99.5768	34.281
							99.5764	34.314
							99.5759	34.35
							99.5755	34.38
							99.5751	34.412
							99.5747	34.445
							99.5743	34.475
							99.5738	34.512
							99.5734	34.543
							99.573	34.575
							99.5726	34.609
							99.5721	34.642
							99.5717	34.673
							99.5713	34.708
							99.5709	34.741
							99.5704	34.775
							99.57	34.806
							99.5696	34.84
							99.5691	34.877
							99.5687	34.91
							99.5683	34.947
							99.5678	34.982
							99.5674	35.017
							99.5669	35.05
							99.5665	35.083
							99.566	35.121
							99.5655	35.158
							99.5651	35.193
							99.5646	35.224
							99.5641	35.261
							99.5637	35.298
							99.5632	35.331
							99.5627	35.366
							99.5622	35.401
							99.5617	35.436
							99.5613	35.469
							99.5607	35.506
							99.5602	35.541
							99.5597	35.575
							99.5592	35.614
							99.5587	35.651
							99.5582	35.686
							99.5577	35.723
							99.5571	35.764
							99.5566	35.798
							99.5561	35.836
							99.5555	35.873
							99.555	35.911
							99.5545	35.945
							99.5539	35.986
							99.5533	36.025
							99.5528	36.06
							99.5522	36.095
							99.5516	36.134
							99.5511	36.17
							99.5505	36.208
							99.5499	36.245
							99.5493	36.283
							99.5487	36.318
							99.5481	36.357
							99.5475	36.393
							99.5469	36.434
							99.5462	36.469
							99.5456	36.508
							99.545	36.549
							99.5443	36.589
							99.5436	36.627
							99.543	36.67
							99.5423	36.71
							99.5416	36.747
							99.5409	36.784
							99.5402	36.826
							99.5395	36.866
							99.5388	36.902
							99.538	36.943
							99.5373	36.981
							99.5365	37.018
							99.5358	37.058
							99.535	37.097
							99.5342	37.135
							99.5335	37.175
							99.5327	37.214
							99.5319	37.253
							99.5311	37.293
							99.5303	37.335
							99.5294	37.375
							99.5286	37.415
							99.5278	37.457
							99.527	37.497
							99.5262	37.537
							99.5254	37.582
							99.5245	37.62
							99.5237	37.662
							99.5229	37.704
							99.5221	37.746
							99.5212	37.785
							99.5204	37.823
							99.5196	37.865
							99.5188	37.908
							99.518	37.947
							99.5172	37.983
							99.5164	38.027
							99.5156	38.067
							99.5148	38.107
							99.514	38.151
							99.5132	38.192
							99.5124	38.235
							99.5116	38.278
							99.5109	38.318
							99.5101	38.363
							99.5093	38.404
							99.5086	38.446
							99.5079	38.491
							99.5071	38.533
							99.5064	38.578
							99.5057	38.621
							99.505	38.665
							99.5043	38.704
							99.5036	38.747
							99.5029	38.791
							99.5022	38.832
							99.5015	38.877
							99.5008	38.919
							99.5002	38.96
							99.4995	39.002
							99.4988	39.046
							99.4982	39.088
							99.4975	39.132
							99.4969	39.172
							99.4962	39.219
							99.4956	39.264
							99.4949	39.305
							99.4943	39.35
							99.4936	39.398
							99.4929	39.441
							99.4923	39.488
							99.4916	39.53
							99.491	39.576
							99.4903	39.622
							99.4896	39.663
							99.4889	39.704
							99.4882	39.753
							99.4875	39.792
							99.4869	39.836
							99.4861	39.878
							99.4854	39.923
							99.4847	39.97
							99.4839	40.011
							99.4832	40.06
							99.4825	40.101
							99.4817	40.147
							99.4809	40.193
							99.4801	40.238
							99.4793	40.282
							99.4785	40.328
							99.4777	40.374
							99.4769	40.42
							99.4761	40.468
							99.4753	40.514
							99.4744	40.559
							99.4736	40.607
							99.4727	40.651
							99.4718	40.696
							99.471	40.744
							99.4701	40.79
							99.4692	40.835
							99.4683	40.877
							99.4674	40.924
							99.4664	40.97
							99.4655	41.014
							99.4646	41.061
							99.4636	41.106
							99.4627	41.152
							99.4617	41.199
							99.4607	41.243
							99.4597	41.29
							99.4587	41.341
							99.4578	41.396
							99.4567	41.443
							99.4557	41.488
							99.4547	41.537
							99.4537	41.585
							99.4526	41.621
							99.4516	41.669
							99.4505	41.714
							99.4494	41.76
							99.4483	41.809
							99.4472	41.856
							99.4462	41.901
							99.445	41.949
							99.4439	41.995
							99.4428	42.042
							99.4417	42.088
							99.4405	42.135
							99.4394	42.181
							99.4382	42.226
							99.437	42.274
							99.4359	42.324
							99.4347	42.372
							99.4335	42.421
							99.4323	42.468
							99.4311	42.517
							99.4299	42.565
							99.4287	42.612
							99.4275	42.664
							99.4263	42.711
							99.4251	42.759
							99.4239	42.81
							99.4227	42.859
							99.4215	42.903
							99.4203	42.952
							99.4191	43
							99.4179	43.046
							99.4167	43.092
							99.4155	43.142
							99.4143	43.189
							99.4132	43.235
							99.412	43.283
							99.4109	43.331
							99.4098	43.38
							99.4086	43.432
							99.4075	43.48
							99.4064	43.531
							99.4053	43.577
							99.4042	43.627
							99.4031	43.678
							99.4021	43.726
							99.401	43.775
							99.4	43.828
							99.3989	43.875
							99.3979	43.925
							99.3969	43.976
							99.3958	44.025
							99.3948	44.075
							99.3938	44.124
							99.3928	44.168
							99.3918	44.217
							99.3907	44.266
							99.3897	44.314
							99.3887	44.365
							99.3877	44.412
							99.3867	44.462
							99.3857	44.513
							99.3846	44.564
							99.3836	44.614
							99.3825	44.662
							99.3815	44.714
							99.3804	44.766
							99.3794	44.82
							99.3783	44.868
							99.3772	44.92
							99.3761	44.97
							99.375	45.019
							99.3739	45.066
							99.3727	45.12
							99.3716	45.167
							99.3705	45.218
							99.3693	45.268
							99.3682	45.319
							99.367	45.367
							99.3658	45.414
							99.3646	45.467
							99.3634	45.517
							99.3622	45.57
							99.361	45.619
							99.3598	45.669
							99.3586	45.719
							99.3574	45.773
							99.3561	45.822
							99.3549	45.876
							99.3537	45.926
							99.3524	45.979
							99.3512	46.03
							99.35	46.081
							99.3487	46.13
							99.3474	46.181
							99.3462	46.233
							99.3449	46.284
							99.3437	46.334
							99.3424	46.386
							99.3412	46.435
							99.3399	46.484
							99.3387	46.535
							99.3374	46.588
							99.3361	46.636
							99.3349	46.688
							99.3336	46.736
							99.3323	46.789
							99.3311	46.84
							99.3298	46.894
							99.3285	46.945
							99.3273	46.998
							99.326	47.05
							99.3247	47.104
							99.3234	47.157
							99.3221	47.208
							99.3208	47.259
							99.3195	47.313
							99.3182	47.365
							99.3169	47.416
							99.3156	47.466
							99.3143	47.516
							99.313	47.567
							99.3116	47.618
							99.3103	47.668
							99.3089	47.719
							99.3076	47.772
							99.3063	47.823
							99.3049	47.875
							99.3036	47.924
							99.3022	47.978
							99.3009	48.03
							99.2995	48.082
							99.2982	48.136
							99.2968	48.19
							99.2954	48.245
							99.2941	48.294
							99.2927	48.348
							99.2913	48.404
							99.29	48.455
							99.2886	48.507
							99.2872	48.561
							99.2859	48.612
							99.2845	48.663
							99.2831	48.718
							99.2818	48.767
							99.2804	48.818
							99.279	48.87
							99.2776	48.922
							99.2763	48.971
							99.2749	49.025
							99.2735	49.08
							99.2722	49.132
							99.2708	49.182
							99.2694	49.237
							99.268	49.291
							99.2666	49.342
							99.2652	49.399
							99.2639	49.454
							99.2625	49.507
							99.261	49.558
							99.2596	49.616
							99.2582	49.666
							99.2568	49.72
							99.2554	49.773
							99.2539	49.826
							99.2525	49.879
							99.251	49.931
							99.2496	49.982
							99.2481	50.036
							99.2466	50.087
							99.2451	50.14
							99.2437	50.193
							99.2422	50.244
							99.2407	50.296
							99.2391	50.353
							99.2376	50.404
							99.2361	50.457
							99.2346	50.512
							99.233	50.567
							99.2315	50.621
							99.23	50.676
							99.2284	50.729
							99.2268	50.783
							99.2253	50.841
							99.2237	50.894
							99.2222	50.947
							99.2206	51.001
							99.2191	51.053
							99.2175	51.108
							99.2159	51.157
							99.2144	51.208
							99.2128	51.262
							99.2113	51.316
							99.2097	51.371
							99.2082	51.423
							99.2066	51.474
							99.2051	51.53
							99.2035	51.581
							99.202	51.637
							99.2004	51.691
							99.1989	51.747
							99.1974	51.8
							99.1958	51.854
							99.1943	51.912
							99.1928	51.964
							99.1912	52.02
							99.1897	52.077
							99.1882	52.128
							99.1867	52.184
							99.1851	52.236
							99.1836	52.29
							99.1821	52.345
							99.1806	52.396
							99.1791	52.451
							99.1775	52.502
							99.176	52.558
							99.1744	52.608
							99.1729	52.664
							99.1714	52.716
							99.1698	52.772
							99.1683	52.825
							99.1667	52.882
							99.1652	52.943
							99.1636	52.998
							99.162	53.047
							99.1604	53.1
							99.1589	53.157
							99.1573	53.209
							99.1557	53.266
							99.1541	53.32
							99.1525	53.376
							99.1509	53.43
							99.1493	53.482
							99.1477	53.537
							99.1461	53.592
							99.1444	53.646
							99.1428	53.698
							99.1412	53.751
							99.1395	53.806
							99.1379	53.857
							99.1362	53.914
							99.1346	53.967
							99.1329	54.022
							99.1313	54.073
							99.1296	54.128
							99.128	54.183
							99.1263	54.24
							99.1247	54.294
							99.123	54.353
							99.1214	54.403
							99.1197	54.462
							99.118	54.515
							99.1164	54.573
							99.1147	54.626
							99.113	54.682
							99.1114	54.737
							99.1097	54.792
							99.108	54.847
							99.1064	54.901
							99.1047	54.953
							99.103	55.008
							99.1013	55.063
							99.0996	55.117
							99.0979	55.171
							99.0963	55.222
							99.0946	55.278
							99.0929	55.334
							99.0912	55.389
							99.0895	55.441
							99.0878	55.497
							99.0861	55.552
							99.0843	55.607
							99.0826	55.668
							99.0809	55.722
							99.0792	55.777
							99.0774	55.833
							99.0757	55.89
							99.0739	55.944
							99.0722	56
							99.0704	56.053
							99.0687	56.109
							99.0669	56.164
							99.0652	56.217
							99.0634	56.269
							99.0616	56.325
							99.0598	56.376
							99.058	56.435
							99.0563	56.49
							99.0545	56.546
							99.0527	56.6
							99.0509	56.655
							99.0491	56.709
							99.0473	56.766
							99.0455	56.823
							99.0438	56.875
							99.042	56.934
							99.0402	56.99
							99.0384	57.046
							99.0366	57.102
							99.0348	57.159
							99.0331	57.213
							99.0313	57.269
							99.0295	57.323
							99.0278	57.378
							99.026	57.432
							99.0243	57.488
							99.0225	57.541
							99.0208	57.595
							99.019	57.649
							99.0173	57.705
							99.0156	57.76
							99.0139	57.813
							99.0122	57.869
							99.0105	57.923
							99.0088	57.979
							99.0071	58.037
							99.0054	58.094
							99.0037	58.148
							99.0021	58.206
							99.0004	58.262
							98.9987	58.319
							98.9971	58.374
							98.9954	58.429
							98.9938	58.487
							98.9921	58.54
							98.9904	58.595
							98.9888	58.652
							98.9871	58.702
							98.9854	58.76
							98.9837	58.813
							98.9821	58.871
							98.9804	58.926
							98.9787	58.977
							98.977	59.034
							98.9752	59.089
							98.9735	59.144
							98.9718	59.202
							98.9701	59.256
							98.9683	59.311
							98.9666	59.368
							98.9648	59.422
							98.9631	59.483
							98.9613	59.536
							98.9595	59.596
							98.9577	59.651
							98.956	59.707
							98.9541	59.761
							98.9524	59.817
							98.9506	59.874
							98.9488	59.93
							98.947	59.982
							98.9452	60.04
							98.9433	60.095
							98.9416	60.146
							98.9398	60.2
							98.9379	60.257
							98.9361	60.315
							98.9343	60.365
							98.9326	60.424
							98.9308	60.478
							98.929	60.533
							98.9272	60.588
							98.9254	60.647
							98.9236	60.705
							98.9219	60.762
							98.9201	60.817
							98.9184	60.874
							98.9166	60.93
							98.9149	60.986
							98.9132	61.042
							98.9114	61.098
							98.9097	61.153
							98.908	61.208
							98.9063	61.263
							98.9047	61.32
							98.903	61.373
							98.9013	61.43
							98.8997	61.483
							98.898	61.538
							98.8964	61.592
							98.8948	61.65
							98.8932	61.701
							98.8916	61.76
							98.89	61.816
							98.8884	61.874
							98.8868	61.93
							98.8853	61.987
							98.8837	62.044
							98.8821	62.1
							98.8806	62.157
							98.879	62.213
							98.8775	62.272
							98.8759	62.328
							98.8744	62.384
							98.8728	62.438
							98.8712	62.493
							98.8697	62.549
							98.8681	62.604
							98.8665	62.661
							98.8649	62.713
							98.8633	62.769
							98.8617	62.825
							98.8601	62.88
							98.8584	62.935
							98.8568	62.992
							98.8551	63.046
							98.8534	63.102
							98.8517	63.159
							98.85	63.217
							98.8482	63.27
							98.8465	63.328
							98.8447	63.385
							98.8429	63.443
							98.8411	63.498
							98.8393	63.555
							98.8375	63.614
							98.8357	63.668
							98.8338	63.725
							98.832	63.782
							98.8301	63.836
							98.8283	63.893
							98.8264	63.944
							98.8246	63.999
							98.8227	64.053
							98.8208	64.109
							98.8189	64.164
							98.8171	64.219
							98.8152	64.275
							98.8134	64.331
							98.8115	64.387
							98.8097	64.44
							98.8078	64.499
							98.806	64.555
							98.8042	64.614
							98.8024	64.669
							98.8007	64.725
							98.7989	64.783
							98.7971	64.841
							98.7954	64.896
							98.7937	64.95
							98.792	65.009
							98.7903	65.064
							98.7887	65.121
							98.787	65.188
							98.7854	65.242
							98.7838	65.297
							98.7822	65.338
							98.7806	65.396
							98.7791	65.451
							98.7776	65.504
							98.776	65.561
							98.7745	65.616
							98.773	65.671
							98.7716	65.73
							98.7701	65.784
							98.7686	65.843
							98.7672	65.9
							98.7658	65.958
							98.7643	66.013
							98.7629	66.072
							98.7615	66.128
							98.7601	66.183
							98.7587	66.24
							98.7573	66.297
							98.7559	66.352
							98.7545	66.407
							98.753	66.464
							98.7516	66.519
							98.7502	66.571
							98.7488	66.628
							98.7474	66.683
							98.7459	66.734
							98.7445	66.793
							98.7431	66.847
							98.7416	66.904
							98.7401	66.959
							98.7387	67.015
							98.7372	67.072
							98.7357	67.127
							98.7342	67.185
							98.7327	67.246
							98.7312	67.3
							98.7297	67.356
							98.7282	67.414
							98.7267	67.469
							98.7251	67.526
							98.7236	67.584
							98.722	67.637
							98.7204	67.693
							98.7189	67.747
							98.7173	67.806
							98.7157	67.858
							98.7141	67.914
							98.7125	67.968
							98.7109	68.023
							98.7093	68.079
							98.7077	68.132
							98.7061	68.188
							98.7044	68.245
							98.7028	68.299
							98.7012	68.357
							98.6995	68.413
							98.6979	68.47
							98.6962	68.526
							98.6946	68.583
							98.6929	68.639
							98.6913	68.696
							98.6896	68.756
							98.688	68.814
							98.6863	68.866
							98.6846	68.923
							98.683	68.976
							98.6813	69.033
							98.6796	69.09
							98.6779	69.145
							98.6763	69.198
							98.6746	69.255
							98.6729	69.31
							98.6712	69.363
							98.6695	69.418
							98.6679	69.475
							98.6662	69.531
							98.6645	69.586
							98.6628	69.643
							98.6611	69.698
							98.6594	69.756
							98.6577	69.812
							98.6561	69.871
							98.6544	69.928
							98.6527	69.982
							98.651	70.039
							98.6493	70.096
							98.6477	70.152
							98.646	70.208
							98.6443	70.268
							98.6427	70.318
							98.641	70.372
							98.6393	70.429
							98.6377	70.484
							98.636	70.54
							98.6344	70.594
							98.6327	70.647
							98.6311	70.705
							98.6294	70.758
							98.6278	70.817
							98.6261	70.87
							98.6245	70.927
							98.6228	70.982
							98.6212	71.04
							98.6195	71.094
							98.6179	71.153
							98.6163	71.209
							98.6146	71.263
							98.613	71.322
							98.6114	71.38
							98.6098	71.433
							98.6081	71.492
							98.6065	71.544
							98.6049	71.6
							98.6033	71.655
							98.6017	71.713
							98.6001	71.765
							98.5986	71.821
							98.597	71.876
							98.5954	71.928
							98.5938	71.981
							98.5923	72.039
							98.5907	72.093
							98.5892	72.149
							98.5876	72.208
							98.5861	72.261
							98.5846	72.317
							98.5831	72.373
							98.5816	72.432
							98.5801	72.486
							98.5786	72.544
							98.5771	72.602
							98.5756	72.658
							98.5742	72.713
							98.5727	72.771
							98.5712	72.824
							98.5698	72.882
							98.5683	72.936
							98.5669	72.993
							98.5654	73.046
							98.564	73.101
							98.5625	73.157
							98.5611	73.208
							98.5597	73.265
							98.5582	73.315
							98.5568	73.375
							98.5553	73.428
							98.5539	73.484
							98.5524	73.537
							98.551	73.594
							98.5495	73.651
							98.5481	73.706
							98.5466	73.763
							98.5452	73.818
							98.5438	73.878
							98.5423	73.933
							98.5408	73.988
							98.5394	74.044
							98.5379	74.101
							98.5364	74.156
							98.5349	74.211
							98.5335	74.269
							98.532	74.321
							98.5305	74.375
							98.529	74.431
							98.5275	74.486
							98.526	74.537
							98.5245	74.594
							98.523	74.646
							98.5215	74.703
							98.52	74.756
							98.5185	74.812
							98.5169	74.868
							98.5154	74.924
							98.5139	74.979
							98.5123	75.032
							98.5108	75.091
							98.5093	75.147
							98.5077	75.204
							98.5062	75.26
							98.5047	75.317
							98.5031	75.371
							98.5016	75.429
							98.5001	75.481
							98.4985	75.54
							98.497	75.593
							98.4955	75.647
							98.4939	75.703
							98.4924	75.757
							98.4909	75.811
							98.4894	75.864
							98.4879	75.922
							98.4864	75.974
							98.4849	76.028
							98.4834	76.083
							98.4819	76.139
							98.4805	76.193
							98.479	76.247
							98.4775	76.304
							98.4761	76.361
							98.4746	76.417
							98.4732	76.472
							98.4718	76.528
							98.4704	76.585
							98.469	76.641
							98.4676	76.7
							98.4662	76.754
							98.4648	76.809
							98.4634	76.865
							98.462	76.918
							98.4607	76.972
							98.4593	77.027
							98.4579	77.079
							98.4566	77.136
							98.4553	77.19
							98.4539	77.243
							98.4526	77.298
							98.4512	77.351
							98.4499	77.407
							98.4486	77.46
							98.4473	77.519
							98.4459	77.575
							98.4446	77.631
							98.4433	77.686
							98.442	77.741
							98.4407	77.797
							98.4394	77.855
							98.438	77.911
							98.4367	77.966
							98.4354	78.019
							98.4341	78.075
							98.4328	78.132
							98.4314	78.185
							98.4301	78.242
							98.4288	78.294
							98.4275	78.348
							98.4262	78.399
							98.4248	78.455
							98.4235	78.508
							98.4222	78.563
							98.4209	78.618
							98.4196	78.672
							98.4182	78.725
							98.4169	78.783
							98.4156	78.835
							98.4142	78.89
							98.4129	78.946
							98.4116	79.003
							98.4103	79.059
							98.409	79.118
							98.4077	79.172
							98.4063	79.23
							98.405	79.283
							98.4037	79.339
							98.4024	79.393
							98.4011	79.446
							98.3998	79.501
							98.3985	79.555
							98.3972	79.61
							98.3959	79.664
							98.3946	79.715
							98.3933	79.769
							98.392	79.825
							98.3907	79.879
							98.3894	79.932
							98.3881	79.989
							98.3869	80.04
							98.3856	80.093
							98.3843	80.153
							98.383	80.207
							98.3817	80.261
							98.3804	80.319
							98.3792	80.374
							98.3779	80.429
							98.3766	80.486
							98.3753	80.542
							98.374	80.596
							98.3727	80.652
							98.3714	80.706
							98.3701	80.758
							98.3688	80.814
							98.3675	80.867
							98.3662	80.923
							98.3649	80.974
							98.3636	81.024
							98.3623	81.079
							98.361	81.131
							98.3597	81.184
							98.3583	81.24
							98.357	81.293
							98.3557	81.349
							98.3543	81.403
							98.353	81.459
							98.3517	81.513
							98.3503	81.571
							98.349	81.625
							98.3476	81.682
							98.3462	81.737
							98.3449	81.793
							98.3435	81.846
							98.3422	81.904
							98.3408	81.956
							98.3395	82.014
							98.3381	82.062
							98.3368	82.119
							98.3354	82.172
							98.3341	82.225
							98.3328	82.279
							98.3315	82.331
							98.3301	82.386
							98.3288	82.435
							98.3275	82.489
							98.3262	82.544
							98.3249	82.598
							98.3236	82.654
							98.3224	82.707
							98.3211	82.76
							98.3198	82.816
							98.3186	82.872
							98.3174	82.93
							98.3161	82.98
							98.3149	83.038
							98.3137	83.095
							98.3125	83.149
							98.3114	83.204
							98.3102	83.259
							98.309	83.314
							98.3079	83.368
							98.3068	83.425
							98.3057	83.474
							98.3046	83.527
							98.3035	83.582
							98.3024	83.635
							98.3013	83.686
							98.3003	83.737
							98.2992	83.792
							98.2982	83.846
							98.2972	83.9
							98.2961	83.954
							98.2951	84.009
							98.2941	84.062
							98.2931	84.12
							98.2921	84.176
							98.2911	84.23
							98.2901	84.287
							98.2892	84.344
							98.2882	84.396
							98.2872	84.45
							98.2862	84.506
							98.2852	84.561
							98.2842	84.617
							98.2832	84.669
							98.2821	84.722
							98.2811	84.771
							98.28	84.826
							98.279	84.881
							98.2779	84.934
							98.2768	84.988
							98.2756	85.038
							98.2745	85.092
							98.2733	85.143
							98.2721	85.199
							98.2709	85.254
							98.2697	85.308
							98.2685	85.362
							98.2672	85.418
							98.2659	85.472
							98.2646	85.527
							98.2633	85.583
							98.2619	85.639
							98.2605	85.693
							98.2592	85.748
							98.2578	85.8
							98.2564	85.857
							98.2549	85.908
							98.2535	85.964
							98.2521	86.016
							98.2507	86.068
							98.2492	86.121
							98.2478	86.174
							98.2464	86.228
							98.2449	86.279
							98.2435	86.331
							98.2421	86.386
							98.2407	86.438
							98.2393	86.492
							98.2379	86.545
							98.2365	86.602
							98.2351	86.654
							98.2338	86.709
							98.2325	86.763
							98.2311	86.818
							98.2298	86.873
							98.2285	86.926
							98.2273	86.982
							98.226	87.039
							98.2248	87.091
							98.2235	87.148
							98.2223	87.203
							98.2211	87.254
							98.2199	87.307
							98.2188	87.359
							98.2176	87.412
							98.2164	87.464
							98.2153	87.517
							98.2142	87.567
							98.2131	87.621
							98.212	87.674
							98.2108	87.724
							98.2098	87.777
							98.2087	87.831
							98.2076	87.887
							98.2065	87.942
							98.2055	87.994
							98.2044	88.051
							98.2034	88.105
							98.2024	88.16
							98.2014	88.214
							98.2003	88.268
							98.1993	88.324
							98.1983	88.376
							98.1973	88.432
							98.1963	88.485
							98.1954	88.538
							98.1944	88.59
							98.1934	88.645
							98.1924	88.697
							98.1915	88.748
							98.1905	88.801
							98.1895	88.851
							98.1886	88.907
							98.1876	88.957
							98.1867	89.012
							98.1857	89.065
							98.1847	89.118
							98.1837	89.173
							98.1828	89.225
							98.1818	89.281
							98.1808	89.334
							98.1798	89.39
							98.1788	89.445
							98.1777	89.502
							98.1767	89.557
							98.1757	89.607
							98.1746	89.663
							98.1735	89.717
							98.1724	89.77
							98.1714	89.823
							98.1703	89.874
							98.1692	89.927
							98.168	89.977
							98.1669	90.032
							98.1658	90.081
							98.1646	90.134
							98.1635	90.185
							98.1623	90.239
							98.1612	90.291
							98.16	90.343
							98.1589	90.395
							98.1577	90.449
							98.1566	90.502
							98.1554	90.557
							98.1543	90.615
							98.1532	90.666
							98.1521	90.721
							98.1509	90.777
							98.1498	90.831
							98.1487	90.884
							98.1477	90.938
							98.1466	90.992
							98.1455	91.044
							98.1445	91.099
							98.1434	91.152
							98.1424	91.204
							98.1414	91.259
							98.1404	91.308
							98.1394	91.359
							98.1384	91.413
							98.1374	91.464
							98.1364	91.517
							98.1355	91.567
							98.1345	91.623
							98.1335	91.673
							98.1326	91.728
							98.1316	91.783
							98.1307	91.837
							98.1298	91.889
							98.1288	91.943
							98.1279	91.998
							98.1269	92.051
							98.126	92.109
							98.1251	92.161
							98.1241	92.217
							98.1232	92.267
							98.1222	92.319
							98.1213	92.374
							98.1203	92.426
							98.1194	92.48
							98.1184	92.53
							98.1175	92.581
							98.1165	92.633
							98.1156	92.684
							98.1146	92.737
							98.1136	92.791
							98.1127	92.842
							98.1117	92.894
							98.1107	92.951
							98.1098	93
							98.1088	93.053
							98.1078	93.108
							98.1068	93.159
							98.1058	93.215
							98.1048	93.271
							98.1038	93.326
							98.1028	93.378
							98.1018	93.433
							98.1008	93.485
							98.0997	93.537
							98.0987	93.591
							98.0977	93.647
							98.0967	93.699
							98.0957	93.75
							98.0946	93.801
							98.0936	93.852
							98.0926	93.906
							98.0916	93.956
							98.0905	94.006
							98.0895	94.06
							98.0885	94.107
							98.0875	94.16
							98.0865	94.215
							98.0855	94.268
							98.0845	94.321
							98.0836	94.375
							98.0826	94.428
							98.0816	94.485
							98.0806	94.535
							98.0797	94.59
							98.0787	94.646
							98.0778	94.701
							98.0768	94.751
							98.0759	94.809
							98.075	94.862
							98.074	94.914
							98.0731	94.966
							98.0722	95.017
							98.0712	95.069
							98.0703	95.122
							98.0694	95.173
							98.0684	95.223
							98.0675	95.274
							98.0666	95.326
							98.0656	95.381
							98.0647	95.43
							98.0637	95.483
							98.0628	95.536
							98.0618	95.587
							98.0608	95.64
							98.0599	95.694
							98.0589	95.75
							98.0579	95.803
							98.0569	95.859
							98.0559	95.913
							98.0549	95.968
							98.0539	96.018
							98.0529	96.073
							98.0519	96.128
							98.0509	96.178
							98.0499	96.23
							98.0489	96.281
							98.0479	96.334
							98.0469	96.383
							98.0459	96.436
							98.0448	96.487
							98.0438	96.537
							98.0428	96.59
							98.0418	96.641
							98.0408	96.69
							98.0398	96.744
							98.0388	96.796
							98.0379	96.849
							98.0369	96.901
							98.0359	96.953
							98.0349	97.008
							98.0339	97.06
							98.033	97.113
							98.032	97.17
							98.031	97.222
							98.0301	97.278
							98.0292	97.331
							98.0282	97.385
							98.0273	97.438
							98.0263	97.489
							98.0254	97.541
							98.0245	97.594
							98.0235	97.643
							98.0226	97.694
							98.0217	97.746
							98.0208	97.798
							98.0199	97.847
							98.019	97.898
							98.0181	97.949
							98.0172	98.004
							98.0163	98.057
							98.0154	98.106
							98.0145	98.157
							98.0137	98.212
							98.0128	98.265
							98.0119	98.318
							98.0111	98.372
							98.0102	98.425
							98.0094	98.48
							98.0085	98.534
							98.0077	98.586
							98.0069	98.643
							98.006	98.691
							98.0052	98.745
							98.0044	98.798
							98.0036	98.849
							98.0028	98.9
							98.002	98.952
							98.0012	99.001
							98.0004	99.052
							97.9996	99.105
							97.9988	99.154
							97.998	99.206
							97.9972	99.259
							97.9964	99.31
							97.9956	99.362
							97.9948	99.414
							97.994	99.466
							97.9933	99.522
							97.9924	99.575
							97.9916	99.629
							97.9908	99.681
							97.99	99.735
							97.9892	99.789
							97.9883	99.841
							97.9875	99.895
							97.9866	99.949
							97.9858	99.998
							97.9849	100.05200
							97.984	100.10400
							97.9832	100.15200
							97.9823	100.20500
							97.9814	100.25600
							97.9804	100.30700
							97.9795	100.35700
							97.9786	100.40900
							97.9776	100.46200
							97.9767	100.51100
							97.9758	100.56200
							97.9748	100.61400
							97.9739	100.66700
							97.9729	100.71800
							97.972	100.77300
							97.971	100.82200
							97.97	100.87800
							97.9691	100.93100
							97.9681	100.98500
							97.9672	101.03900
							97.9662	101.09200
							97.9653	101.14200
							97.9644	101.19800
							97.9635	101.24900
							97.9625	101.30300
							97.9616	101.35500
							97.9608	101.40700
							97.9599	101.45800
							97.959	101.51000
							97.9582	101.55800
							97.9573	101.60700
							97.9565	101.65900
							97.9557	101.70900
							97.9548	101.76100
							97.954	101.81300
							97.9533	101.86400
							97.9525	101.91500
							97.9517	101.96800
							97.951	102.01900
							97.9502	102.07100
							97.9495	102.12600
							97.9488	102.18100
							97.9481	102.23300
							97.9474	102.28600
							97.9467	102.34000
							97.946	102.39500
							97.9453	102.44600
							97.9446	102.50000
							97.9439	102.55400
							97.9432	102.60300
							97.9426	102.65500
							97.9419	102.70900
							97.9412	102.75800
							97.9406	102.80900
							97.9399	102.86000
							97.9392	102.90900
							97.9386	102.95900
							97.9379	103.01000
							97.9372	103.06400
							97.9366	103.11300
							97.9359	103.16300
							97.9352	103.21400
							97.9346	103.26900
							97.9339	103.31900
							97.9332	103.37000
							97.9325	103.42600
							97.9319	103.47900
							97.9312	103.53300
							97.9305	103.58500
							97.9298	103.63800
							97.9291	103.69400
							97.9284	103.74700
							97.9277	103.79900
							97.927	103.85000
							97.9263	103.90300
							97.9256	103.95500
							97.9248	104.00300
							97.9241	104.05600
							97.9233	104.10900
							97.9226	104.15800
							97.9219	104.20800
							97.9211	104.25900
							97.9203	104.30800
							97.9195	104.35800
							97.9187	104.40800
							97.9179	104.45900
							97.9171	104.51300
							97.9163	104.56500
							97.9155	104.61600
							97.9147	104.67100
							97.9138	104.72400
							97.913	104.77500
							97.9122	104.82900
							97.9113	104.88100
							97.9105	104.93400
							97.9096	104.98900
							97.9088	105.04300
							97.9079	105.09100
							97.907	105.14400
							97.9062	105.19800
							97.9053	105.24700
							97.9044	105.29800
							97.9036	105.34800
							97.9027	105.40100
							97.9019	105.45100
							97.901	105.49900
							97.9002	105.54800
							97.8993	105.60000
							97.8985	105.65300
							97.8977	105.70200
							97.8968	105.75300
							97.896	105.80400
							97.8952	105.85600
							97.8944	105.90800
							97.8936	105.96100
							97.8928	106.01500
							97.892	106.06700
							97.8912	106.12000
							97.8904	106.17300
							97.8896	106.22700
							97.8889	106.27800
							97.8881	106.33100
							97.8873	106.38500
							97.8866	106.43600
							97.8858	106.48800
							97.8851	106.54000
							97.8843	106.58800
							97.8836	106.63800
							97.8829	106.68900
							97.8821	106.74000
							97.8814	106.78800
							97.8807	106.84000
							97.88	106.89000
							97.8793	106.94200
							97.8786	106.99200
							97.8779	107.04100
							97.8772	107.09300
							97.8765	107.14300
							97.8758	107.19700
							97.8752	107.25100
							97.8745	107.30200
							97.8738	107.35900
							97.8732	107.40700
							97.8725	107.46200
							97.8719	107.51700
							97.8712	107.56800
							97.8706	107.62100
							97.87	107.67400
							97.8693	107.72600
							97.8687	107.77700
							97.8681	107.83000
							97.8675	107.88000
							97.8669	107.92700
							97.8663	107.97900
							97.8657	108.02800
							97.8651	108.08100
							97.8645	108.12900
							97.8639	108.18100
							97.8633	108.23000
							97.8627	108.28200
							97.8621	108.33600
							97.8615	108.39400
							97.8609	108.44400
							97.8603	108.49800
							97.8597	108.54100
							97.859	108.59200
							97.8584	108.64700
							97.8578	108.69900
							97.8572	108.75300
							97.8565	108.80400
							97.8559	108.85800
							97.8552	108.91300
							97.8545	108.96400
							97.8539	109.01500
							97.8532	109.06800
							97.8525	109.11900
							97.8518	109.16900
							97.8511	109.21900
							97.8503	109.26800
							97.8496	109.31900
							97.8488	109.36700
							97.8481	109.41900
							97.8473	109.47000
							97.8465	109.51900
							97.8458	109.57200
							97.845	109.62100
							97.8442	109.67300
							97.8434	109.72700
							97.8426	109.77800
							97.8418	109.82900
							97.841	109.88400
							97.8402	109.93400
							97.8393	109.99000
							97.8385	110.04100
							97.8377	110.09600
							97.8369	110.14700
							97.8361	110.20000
							97.8353	110.25100
							97.8345	110.30500
							97.8337	110.35600
							97.8329	110.40700
							97.8321	110.45700
							97.8314	110.50400
							97.8306	110.55600
							97.8298	110.60700
							97.8291	110.65300
							97.8283	110.70700
							97.8276	110.75700
							97.8269	110.80700
							97.8262	110.85800
							97.8255	110.91200
							97.8248	110.96300
							97.8241	111.01300
							97.8234	111.06700
							97.8227	111.12000
							97.822	111.17200
							97.8213	111.22100
							97.8207	111.27900
							97.82	111.33100
							97.8193	111.38400
							97.8187	111.43700
							97.818	111.49000
							97.8173	111.54000
							97.8166	111.59300
							97.816	111.64400
							97.8153	111.69300
							97.8146	111.74800
							97.814	111.79400
							97.8133	111.84400
							97.8126	111.89500
							97.8119	111.94700
							97.8112	111.99300
							97.8106	112.04200
							97.8099	112.09600
							97.8092	112.14500
							97.8085	112.19500
							97.8078	112.24900
							97.8071	112.29900
							97.8065	112.35000
							97.8058	112.40200
							97.8051	112.45700
							97.8045	112.51000
							97.8039	112.56200
							97.8032	112.61300
							97.8026	112.66800
							97.802	112.72000
							97.8014	112.77300
							97.8008	112.82400
							97.8002	112.87900
							97.7996	112.92700
							97.7991	112.98000
							97.7985	113.02900
							97.798	113.07900
							97.7974	113.13000
							97.7969	113.17900
							97.7964	113.22900
							97.7959	113.27900
							97.7955	113.33000
							97.795	113.38100
							97.7945	113.43100
							97.7941	113.48100
							97.7936	113.53200
							97.7932	113.58400
							97.7928	113.63700
							97.7923	113.68900
							97.7919	113.74100
							97.7915	113.79500
							97.7911	113.85000
							97.7907	113.89900
							97.7902	113.95300
							97.7898	114.00500
							97.7894	114.05800
							97.789	114.10900
							97.7886	114.16400
							97.7882	114.21200
							97.7878	114.26500
							97.7873	114.31700
							97.7869	114.36600
							97.7865	114.41600
							97.7861	114.46500
							97.7856	114.51500
							97.7852	114.56700
							97.7847	114.61600
							97.7843	114.66800
							97.7838	114.71800
							97.7834	114.76800
							97.7829	114.81800
							97.7824	114.87100
							97.782	114.92300
							97.7815	114.97200
							97.781	115.02700
							97.7805	115.07700
							97.78	115.13200
							97.7795	115.18400
							97.779	115.23600
							97.7785	115.28600
							97.778	115.34200
							97.7775	115.39400
							97.777	115.44600
							97.7764	115.49500
							97.7759	115.54800
							97.7754	115.59800
							97.7749	115.64800
							97.7743	115.69900
							97.7738	115.75100
							97.7733	115.80000
							97.7728	115.85000
							97.7722	115.90100
							97.7717	115.95000
							97.7712	116.00100
							97.7706	116.05100
							97.7701	116.10300
							97.7696	116.15800
							97.769	116.20700
							97.7685	116.25900
							97.7679	116.31200
							97.7674	116.36500
							97.7669	116.41800
							97.7663	116.47000
							97.7658	116.52300
							97.7652	116.57600
							97.7647	116.62700
							97.7641	116.68100
							97.7636	116.73200
							97.763	116.78200
							97.7625	116.83500
							97.7619	116.88500
							97.7613	116.93700
							97.7608	116.98700
							97.7602	117.03500
							97.7596	117.09000
							97.759	117.13800
							97.7584	117.18700
							97.7578	117.23800
							97.7572	117.28900
							97.7566	117.34100
							97.7561	117.38900
							97.7554	117.44200
							97.7549	117.49200
							97.7542	117.54400
							97.7536	117.59900
							97.753	117.65100
							97.7524	117.70500
							97.7518	117.75700
							97.7511	117.80800
							97.7505	117.86000
							97.7499	117.91300
							97.7492	117.96500
							97.7486	118.01800
							97.748	118.07000
							97.7473	118.12200
							97.7467	118.17100
							97.746	118.22100
							97.7453	118.27300
							97.7447	118.32500
							97.744	118.37400
							97.7433	118.42600
							97.7426	118.47300
							97.742	118.52500
							97.7413	118.57700
							97.7406	118.62800
							97.7399	118.67800
							97.7392	118.72700
							97.7385	118.77900
							97.7378	118.83000
							97.7371	118.88300
							97.7364	118.93300
							97.7356	118.99000
							97.7349	119.03900
							97.7342	119.09200
							97.7334	119.14400
							97.7327	119.19800
							97.7319	119.25100
							97.7312	119.30100
							97.7305	119.35200
							97.7297	119.40400
							97.7289	119.45600
							97.7282	119.50600
							97.7274	119.56000
							97.7267	119.60900
							97.7259	119.65800
							97.7252	119.71100
							97.7244	119.76400
							97.7236	119.81400
							97.7229	119.86500
							97.7221	119.91500
							97.7214	119.96400
							97.7206	120.01600
							97.7199	120.06400
							97.7192	120.11900
							97.7184	120.16900
							97.7177	120.22100
							97.717	120.27300
							97.7163	120.32500
							97.7155	120.37800
							97.7148	120.42800
							97.7142	120.48100
							97.7135	120.53300
							97.7128	120.58400
							97.7121	120.63700
							97.7114	120.68900
							97.7108	120.74300
							97.7101	120.79100
							97.7095	120.84300
							97.7089	120.89300
							97.7083	120.94500
							97.7076	120.99400
							97.707	121.04500
							97.7064	121.09600
							97.7058	121.14800
							97.7053	121.19800
							97.7047	121.25000
							97.7041	121.30100
							97.7035	121.35000
							97.703	121.40100
							97.7024	121.45400
							97.7019	121.50700
							97.7013	121.55800
							97.7008	121.61000
							97.7003	121.65900
							97.6997	121.71200
							97.6992	121.76300
							97.6987	121.81700
							97.6981	121.86800
							97.6976	121.91800
							97.6971	121.97000
							97.6966	122.02300
							97.6961	122.07200
							97.6955	122.12500
							97.695	122.17600
							97.6945	122.22800
							97.694	122.28000
							97.6935	122.33000
							97.693	122.37900
							97.6924	122.42900
							97.6919	122.48100
							97.6914	122.53300
							97.6909	122.58300
							97.6904	122.63500
							97.6899	122.68600
							97.6894	122.73700
							97.6888	122.78800
							97.6883	122.84000
							97.6878	122.89200
							97.6873	122.94300
							97.6867	122.99700
							97.6862	123.04400
							97.6857	123.09700
							97.6852	123.14900
							97.6846	123.20100
							97.6841	123.25300
							97.6836	123.30500
							97.683	123.35700
							97.6825	123.40600
							97.682	123.46000
							97.6814	123.50500
							97.6809	123.56100
							97.6804	123.61000
							97.6798	123.66300
							97.6793	123.71600
							97.6787	123.76600
							97.6782	123.81500
							97.6777	123.86700
							97.6771	123.91600
							97.6766	123.96900
							97.676	124.01800
							97.6755	124.07200
							97.6749	124.12200
							97.6744	124.17400
							97.6738	124.22500
							97.6733	124.27500
							97.6727	124.32700
							97.6722	124.37600
							97.6716	124.43100
							97.671	124.48300
							97.6705	124.53400
							97.6699	124.58500
							97.6694	124.63400
[truncated: 15,440 more rows]

## Sheet: Figure_11_a_UV Light
MB Before Mix				MB in Dark				15 min				30 min				45 min				60 min				75 min				90 min				105 min				120 min
Sample Name	BLANK			Sample Name	DARK			Sample Name	UV1			Sample Name	UV2			Sample Name	UV3			Sample Name	UV4			Sample Name	UV5			Sample Name	UV6			Sample Name	UV7			Sample Name	UV8
Time	2022/06/26 10:30:14			Time	2022/06/26 10:33:12			Time	2022/06/26 10:42:44			Time	2022/06/26 10:53:54			Time	2022/06/26 11:09:44			Time	2022/06/26 11:27:26			Time	2022/06/26 11:58:37			Time	2022/06/26 12:04:49			Time	2022/06/26 12:17:10			Time	2022/06/26 12:32:54
Operator	Smith			Operator	Smith			Operator	Smith			Operator	Smith			Operator	Smith			Operator	Smith			Operator	Smith			Operator	Smith			Operator	Smith			Operator	Smith
Lamp	255			Lamp	255			Lamp	255			Lamp	255			Lamp	255			Lamp	255			Lamp	255			Lamp	255			Lamp	255			Lamp	255
Slit	0			Slit	0			Slit	0			Slit	0			Slit	0			Slit	0			Slit	0			Slit	0			Slit	0			Slit	0
Scan From	1100.0nm			Scan From	1100.0nm			Scan From	1100.0nm			Scan From	1100.0nm			Scan From	1100.0nm			Scan From	1100.0nm			Scan From	1100.0nm			Scan From	1100.0nm			Scan From	1100.0nm			Scan From	1100.0nm
Scan To	190.0nm			Scan To	190.0nm			Scan To	190.0nm			Scan To	190.0nm			Scan To	190.0nm			Scan To	190.0nm			Scan To	190.0nm			Scan To	190.0nm			Scan To	190.0nm			Scan To	190.0nm
Scan Step	1.0nm			Scan Step	1.0nm			Scan Step	1.0nm			Scan Step	1.0nm			Scan Step	1.0nm			Scan Step	1.0nm			Scan Step	1.0nm			Scan Step	1.0nm			Scan Step	1.0nm			Scan Step	1.0nm
Sample Filter	5			Sample Filter	5			Sample Filter	5			Sample Filter	5			Sample Filter	5			Sample Filter	5			Sample Filter	5			Sample Filter	5			Sample Filter	5			Sample Filter	5
memo				memo				memo				memo				memo				memo				memo				memo				memo				memo
WL(nm)	Abs	T%		WL(nm)	Abs	T%		WL(nm)	Abs	T%		WL(nm)	Abs	T%		WL(nm)	Abs	T%		WL(nm)	Abs	T%		WL(nm)	Abs	T%		WL(nm)	Abs	T%		WL(nm)	Abs	T%		WL(nm)	Abs	T%
190	0.4789	33.2		190	0.4663	34.17		190	0.5034	31.38		190	0.459	34.76		190	0.4335	36.85		190	0.4424	36.11		190	0.3882	40.91		190	0.3976	40.03		190	0.4036	39.48		190	0.4314	37.04
191	0.4795	33.15		191	0.4679	34.05		191	0.5015	31.51		191	0.4609	34.6		191	0.4351	36.72		191	0.4418	36.16		191	0.3908	40.67		191	0.3964	40.14		191	0.4081	39.08		191	0.4307	37.09
192	0.4699	33.89		192	0.4606	34.63		192	0.4911	32.28		192	0.4512	35.38		192	0.4273	37.38		192	0.4341	36.81		192	0.388	40.92		192	0.3922	40.54		192	0.4066	39.21		192	0.4296	37.19
193	0.4626	34.47		193	0.4516	35.35		193	0.4834	32.85		193	0.4457	35.84		193	0.4226	37.8		193	0.4287	37.26		193	0.3862	41.09		193	0.3884	40.88		193	0.4039	39.46		193	0.4255	37.54
194	0.4576	34.86		194	0.4475	35.68		194	0.4794	33.16		194	0.4424	36.11		194	0.4197	38.05		194	0.4261	37.49		194	0.3846	41.25		194	0.3866	41.06		194	0.399	39.9		194	0.4203	38
195	0.4466	35.76		195	0.4366	36.59		195	0.4692	33.95		195	0.434	36.81		195	0.413	38.64		195	0.42	38.02		195	0.3811	41.58		195	0.3827	41.43		195	0.3898	40.75		195	0.4105	38.86
196	0.4374	36.52		196	0.4275	37.37		196	0.4611	34.59		196	0.4275	37.37		196	0.4078	39.11		196	0.4144	38.51		196	0.3767	42		196	0.3777	41.91		196	0.3864	41.08		196	0.4077	39.11
197	0.4289	37.25		197	0.4186	38.14		197	0.4538	35.17		197	0.4213	37.9		197	0.4029	39.54		197	0.41	38.91		197	0.3733	42.33		197	0.3739	42.28		197	0.3835	41.35		197	0.4041	39.43
198	0.421	37.93		198	0.41	38.9		198	0.4466	35.76		198	0.416	38.37		198	0.3978	40.01		198	0.405	39.35		198	0.3691	42.74		198	0.37	42.65		198	0.3784	41.84		198	0.3982	39.98
199	0.4127	38.67		199	0.4017	39.66		199	0.4391	36.38		199	0.4098	38.92		199	0.393	40.46		199	0.3999	39.82		199	0.3647	43.18		199	0.3657	43.09		199	0.3731	42.35		199	0.3923	40.53
200	0.4047	39.38		200	0.3929	40.47		200	0.432	36.98		200	0.4036	39.49		200	0.3879	40.94		200	0.3948	40.29		200	0.3604	43.61		200	0.361	43.55		200	0.3674	42.92		200	0.3865	41.07
201	0.3947	40.3		201	0.3831	41.39		201	0.424	37.67		201	0.3971	40.07		201	0.382	41.49		201	0.3893	40.81		201	0.3557	44.09		201	0.3562	44.03		201	0.3618	43.48		201	0.3803	41.65
202	0.3879	40.94		202	0.3761	42.07		202	0.4183	38.17		202	0.3926	40.49		202	0.3782	41.86		202	0.3854	41.17		202	0.3523	44.43		202	0.3531	44.35		202	0.3573	43.92		202	0.3755	42.12
203	0.3737	42.29		203	0.3621	43.44		203	0.4068	39.19		203	0.3829	41.41		203	0.3701	42.65		203	0.3775	41.92		203	0.3463	45.05		203	0.3463	45.05		203	0.3496	44.71		203	0.3668	42.98
204	0.3621	43.44		204	0.3512	44.55		204	0.3971	40.08		204	0.375	42.17		204	0.3637	43.28		204	0.3713	42.53		204	0.3405	45.66		204	0.3406	45.64		204	0.3429	45.4		204	0.3596	43.69
205	0.3502	44.65		205	0.3401	45.7		205	0.3874	40.98		205	0.3665	43		205	0.3566	43.99		205	0.3639	43.26		205	0.3344	46.3		205	0.3343	46.32		205	0.3358	46.15		205	0.3514	44.52
206	0.3391	45.8		206	0.3299	46.79		206	0.3783	41.85		206	0.3591	43.75		206	0.35	44.67		206	0.3575	43.9		206	0.3287	46.92		206	0.3288	46.9		206	0.329	46.88		206	0.344	45.29
207	0.3298	46.79		207	0.321	47.76		207	0.3702	42.64		207	0.3522	44.45		207	0.3441	45.28		207	0.3519	44.47		207	0.3237	47.46		207	0.3237	47.46		207	0.3229	47.55		207	0.3376	45.97
208	0.3212	47.73		208	0.3126	48.68		208	0.3627	43.38		208	0.3462	45.07		208	0.3383	45.89		208	0.3464	45.04		208	0.3186	48.02		208	0.3182	48.06		208	0.3168	48.21		208	0.3307	46.7
209	0.3132	48.61		209	0.3053	49.51		209	0.3561	44.05		209	0.3405	45.66		209	0.3331	46.44		209	0.3409	45.61		209	0.3136	48.57		209	0.3133	48.6		209	0.3111	48.86		209	0.3242	47.4
210	0.3057	49.47		210	0.2985	50.29		210	0.3501	44.66		210	0.3352	46.22		210	0.3277	47.02		210	0.3358	46.15		210	0.3088	49.12		210	0.3086	49.13		210	0.3053	49.51		210	0.3178	48.11
211	0.2989	50.24		211	0.2923	51.02		211	0.3443	45.26		211	0.3302	46.75		211	0.3228	47.56		211	0.331	46.66		211	0.3043	49.62		211	0.304	49.65		211	0.2999	50.13		211	0.3119	48.76
212	0.2928	50.96		212	0.2866	51.69		212	0.339	45.81		212	0.326	47.21		212	0.3178	48.1		212	0.3264	47.16		212	0.3	50.12		212	0.2992	50.21		212	0.2944	50.76		212	0.306	49.43
213	0.2876	51.57		213	0.282	52.24		213	0.3347	46.28		213	0.3216	47.69		213	0.3133	48.6		213	0.3222	47.62		213	0.296	50.58		213	0.295	50.7		213	0.2895	51.35		213	0.3006	50.05
214	0.2828	52.14		214	0.2775	52.79		214	0.3306	46.71		214	0.3177	48.12		214	0.309	49.09		214	0.318	48.08		214	0.2923	51.02		214	0.291	51.17		214	0.2847	51.91		214	0.2955	50.64
215	0.2787	52.64		215	0.2736	53.26		215	0.3269	47.11		215	0.3143	48.49		215	0.3049	49.56		215	0.3144	48.48		215	0.2889	51.42		215	0.2871	51.63		215	0.28	52.48		215	0.2907	51.21
216	0.2748	53.11		216	0.27	53.7		216	0.3236	47.47		216	0.3112	48.84		216	0.3009	50.01		216	0.3111	48.85		216	0.2855	51.82		216	0.2832	52.09		216	0.2757	53		216	0.286	51.76
217	0.271	53.58		217	0.2668	54.11		217	0.3207	47.78		217	0.3083	49.17		217	0.2974	50.43		217	0.3079	49.22		217	0.2824	52.19		217	0.2796	52.53		217	0.2717	53.49		217	0.2816	52.29
218	0.2676	54		218	0.2636	54.5		218	0.3179	48.1		218	0.3056	49.48		218	0.2941	50.81		218	0.3051	49.54		218	0.2796	52.53		218	0.2762	52.95		218	0.2678	53.98		218	0.2772	52.82
219	0.2646	54.38		219	0.2609	54.85		219	0.3156	48.35		219	0.3034	49.73		219	0.2914	51.13		219	0.3027	49.81		219	0.277	52.84		219	0.2731	53.32		219	0.2644	54.4		219	0.2735	53.27
220	0.2618	54.73		220	0.2585	55.15		220	0.3141	48.51		220	0.3015	49.94		220	0.2892	51.38		220	0.3006	50.05		220	0.2746	53.14		220	0.2703	53.67		220	0.2612	54.81		220	0.2698	53.72
221	0.2598	54.98		221	0.2567	55.37		221	0.3122	48.73		221	0.3	50.12		221	0.2873	51.6		221	0.2986	50.29		221	0.2724	53.41		221	0.2676	54		221	0.258	55.21		221	0.2662	54.18
222	0.2585	55.14		222	0.2557	55.5		222	0.3114	48.82		222	0.2992	50.21		222	0.286	51.77		222	0.297	50.47		222	0.2705	53.64		222	0.2651	54.31		222	0.2549	55.6		222	0.2627	54.61
223	0.2586	55.14		223	0.256	55.47		223	0.3115	48.8		223	0.2989	50.25		223	0.2849	51.89		223	0.2957	50.61		223	0.269	53.82		223	0.2629	54.59		223	0.2523	55.94		223	0.2596	55
224	0.2595	55.02		224	0.2567	55.37		224	0.3123	48.72		224	0.299	50.23		224	0.2845	51.94		224	0.2946	50.75		224	0.2673	54.03		224	0.2607	54.87		224	0.2495	56.3		224	0.2564	55.41
225	0.2613	54.79		225	0.2584	55.15		225	0.3137	48.56		225	0.2995	50.18		225	0.2841	51.99		225	0.2936	50.86		225	0.2657	54.24		225	0.2585	55.14		225	0.2467	56.67		225	0.2529	55.86
226	0.2643	54.41		226	0.2612	54.8		226	0.316	48.31		226	0.3006	50.05		226	0.284	52		226	0.293	50.94		226	0.2642	54.43		226	0.2562	55.43		226	0.2438	57.04		226	0.2495	56.3
227	0.2674	54.03		227	0.2643	54.41		227	0.3181	48.07		227	0.3019	49.9		227	0.284	52		227	0.2922	51.02		227	0.263	54.58		227	0.2541	55.7		227	0.2412	57.39		227	0.2464	56.7
228	0.2706	53.62		228	0.2672	54.05		228	0.3207	47.79		228	0.3033	49.74		228	0.2845	51.94		228	0.2919	51.06		228	0.2621	54.69		228	0.2526	55.9		228	0.2391	57.67		228	0.2438	57.04
229	0.2743	53.18		229	0.2706	53.62		229	0.3236	47.47		229	0.3051	49.53		229	0.2853	51.84		229	0.2919	51.06		229	0.2616	54.75		229	0.2514	56.05		229	0.2372	57.92		229	0.2414	57.35
230	0.2787	52.64		230	0.2748	53.11		230	0.327	47.1		230	0.3075	49.26		230	0.2867	51.68		230	0.2926	50.98		230	0.2613	54.79		230	0.2503	56.2		230	0.2356	58.13		230	0.2391	57.66
231	0.2843	51.96		231	0.2801	52.47		231	0.3317	46.59		231	0.3109	48.88		231	0.2889	51.41		231	0.2938	50.83		231	0.2616	54.75		231	0.2498	56.26		231	0.2343	58.31		231	0.2374	57.89
232	0.2915	51.11		232	0.2865	51.7		232	0.3375	45.98		232	0.3152	48.39		232	0.2916	51.1		232	0.2955	50.64		232	0.2622	54.67		232	0.2494	56.31		232	0.2332	58.46		232	0.2358	58.11
233	0.3007	50.03		233	0.2953	50.67		233	0.3452	45.17		233	0.321	47.75		233	0.2957	50.61		233	0.2983	50.31		233	0.2637	54.49		233	0.2498	56.26		233	0.2327	58.52		233	0.2346	58.26
234	0.3121	48.74		234	0.3061	49.42		234	0.3544	44.22		234	0.328	46.99		234	0.3007	50.03		234	0.3018	49.91		234	0.2656	54.25		234	0.2506	56.16		234	0.2325	58.54		234	0.2337	58.38
235	0.3252	47.29		235	0.3184	48.04		235	0.3648	43.17		235	0.3359	46.15		235	0.3063	49.4		235	0.3058	49.46		235	0.2678	53.97		235	0.2515	56.04		235	0.2326	58.53		235	0.2333	58.44
236	0.3405	45.66		236	0.3329	46.46		236	0.3769	41.99		236	0.3451	45.17		236	0.3127	48.67		236	0.3105	48.92		236	0.2707	53.62		236	0.253	55.85		236	0.2332	58.45		236	0.2332	58.45
237	0.3582	43.83		237	0.3491	44.76		237	0.3905	40.69		237	0.3554	44.12		237	0.32	47.86		237	0.3159	48.32		237	0.2737	53.25		237	0.2548	55.62		237	0.234	58.35		237	0.2332	58.45
238	0.3776	41.92		238	0.3674	42.91		238	0.4058	39.28		238	0.367	42.95		238	0.3279	47.01		238	0.3216	47.69		238	0.2769	52.85		238	0.2566	55.38		238	0.2349	58.22		238	0.2335	58.41
239	0.3971	40.08		239	0.3855	41.16		239	0.4209	37.94		239	0.3774	41.94		239	0.3357	46.16		239	0.3269	47.11		239	0.2801	52.46		239	0.2583	55.17		239	0.2357	58.11		239	0.2337	58.38
240	0.4171	38.27		240	0.4035	39.49		240	0.4359	36.65		240	0.3885	40.88		240	0.3424	45.46		240	0.3321	46.55		240	0.2832	52.1		240	0.2599	54.97		240	0.2365	58.01		240	0.2339	58.35
241	0.4377	36.5		241	0.4223	37.81		241	0.4513	35.38		241	0.3994	39.87		241	0.3495	44.72		241	0.3371	46.01		241	0.2858	51.78		241	0.2614	54.78		241	0.2372	57.91		241	0.234	58.34
242	0.4571	34.91		242	0.4406	36.25		242	0.4658	34.21		242	0.4091	38.98		242	0.3556	44.09		242	0.3412	45.58		242	0.288	51.52		242	0.2621	54.69		242	0.2374	57.88		242	0.2337	58.38
243	0.4739	33.58		243	0.4564	34.96		243	0.478	33.27		243	0.4171	38.28		243	0.3603	43.62		243	0.3438	45.31		243	0.289	51.4		243	0.2623	54.66		243	0.2372	57.92		243	0.2333	58.44
244	0.4875	32.54		244	0.4688	33.98		244	0.4874	32.56		244	0.4228	37.78		244	0.3629	43.36		244	0.3453	45.16		244	0.289	51.4		244	0.262	54.7		244	0.2365	58		244	0.2324	58.56
245	0.4972	31.83		245	0.4779	33.28		245	0.4937	32.09		245	0.4255	37.54		245	0.3636	43.29		245	0.3447	45.21		245	0.2882	51.5		245	0.2609	54.84		245	0.2354	58.15		245	0.2311	58.74
246	0.5003	31.6		246	0.481	33.04		246	0.4949	31.99		246	0.4244	37.63		246	0.3615	43.5		246	0.3424	45.46		246	0.2861	51.75		246	0.2589	55.09		246	0.2337	58.39		246	0.2296	58.94
247	0.4959	31.92		247	0.477	33.34		247	0.49	32.36		247	0.4195	38.06		247	0.3568	43.98		247	0.3383	45.89		247	0.2831	52.11		247	0.2565	55.4		247	0.2317	58.65		247	0.2276	59.22
248	0.4831	32.88		248	0.4653	34.26		248	0.4793	33.16		248	0.4106	38.85		248	0.3496	44.71		248	0.3326	46.49		248	0.2791	52.59		248	0.2536	55.77		248	0.2294	58.96		248	0.2256	59.48
249	0.4638	34.37		249	0.4474	35.69		249	0.4638	34.37		249	0.3989	39.92		249	0.3406	45.65		249	0.326	47.2		249	0.2747	53.12		249	0.2504	56.19		249	0.227	59.29		249	0.2235	59.78
250	0.4408	36.24		250	0.4261	37.49		250	0.4465	35.77		250	0.3862	41.1		250	0.3312	46.64		250	0.3193	47.94		250	0.2704	53.65		250	0.2475	56.56		250	0.2248	59.59		250	0.2213	60.07
251	0.4174	38.24		251	0.4047	39.38		251	0.429	37.24		251	0.3734	42.32		251	0.3224	47.6		251	0.3129	48.65		251	0.2664	54.15		251	0.2447	56.93		251	0.2228	59.86		251	0.2196	60.31
252	0.3949	40.28		252	0.3842	41.28		252	0.4127	38.66		252	0.3618	43.47		252	0.3144	48.48		252	0.307	49.32		252	0.2629	54.59		252	0.2422	57.25		252	0.2212	60.09		252	0.2179	60.55
253	0.3749	42.18		253	0.3656	43.09		253	0.3976	40.03		253	0.3516	44.51		253	0.3073	49.28		253	0.3018	49.91		253	0.2598	54.97		253	0.2401	57.53		253	0.2196	60.32		253	0.2165	60.75
254	0.3586	43.79		254	0.3507	44.6		254	0.3855	41.16		254	0.3432	45.37		254	0.3017	49.92		254	0.2981	50.34		254	0.2575	55.27		254	0.2386	57.73		254	0.2185	60.46		254	0.2154	60.9
255	0.346	45.08		255	0.3392	45.8		255	0.3763	42.05		255	0.3367	46.05		255	0.2977	50.39		255	0.2951	50.69		255	0.2558	55.48		255	0.2376	57.87		255	0.2176	60.59		255	0.2145	61.02
256	0.3358	46.16		256	0.3303	46.74		256	0.3695	42.71		256	0.3321	46.55		256	0.2949	50.71		256	0.2932	50.91		256	0.2548	55.62		256	0.2369	57.95		256	0.2173	60.63		256	0.2139	61.11
257	0.328	46.99		257	0.3234	47.49		257	0.3642	43.23		257	0.329	46.88		257	0.2929	50.95		257	0.292	51.06		257	0.2541	55.7		257	0.2367	57.99		257	0.2169	60.68		257	0.2134	61.18
258	0.3233	47.5		258	0.3187	48		258	0.3609	43.56		258	0.3273	47.07		258	0.292	51.05		258	0.2917	51.09		258	0.2542	55.69		258	0.2366	57.99		258	0.2171	60.65		258	0.2134	61.18
259	0.3207	47.79		259	0.3164	48.27		259	0.3597	43.68		259	0.3271	47.08		259	0.2923	51.02		259	0.2921	51.04		259	0.2547	55.62		259	0.2372	57.92		259	0.2174	60.62		259	0.2135	61.16
260	0.3203	47.83		260	0.316	48.3		260	0.3601	43.64		260	0.3283	46.95		260	0.2936	50.87		260	0.2934	50.89		260	0.2557	55.5		260	0.2381	57.8		260	0.2181	60.52		260	0.2138	61.12
261	0.3221	47.63		261	0.3179	48.1		261	0.3626	43.39		261	0.331	46.66		261	0.2961	50.57		261	0.2958	50.61		261	0.2576	55.25		261	0.2395	57.61		261	0.2193	60.36		261	0.2146	61.01
262	0.3268	47.12		262	0.3221	47.63		262	0.3672	42.93		262	0.3353	46.21		262	0.2997	50.15		262	0.2989	50.24		262	0.2598	54.99		262	0.2413	57.38		262	0.2205	60.18		262	0.2155	60.88
263	0.3336	46.38		263	0.3285	46.93		263	0.3735	42.32		263	0.3409	45.61		263	0.3041	49.64		263	0.3026	49.82		263	0.2625	54.64		263	0.2432	57.13		263	0.222	59.98		263	0.2167	60.72
264	0.3436	45.33		264	0.3374	45.99		264	0.382	41.49		264	0.3481	44.87		264	0.3097	49.01		264	0.3072	49.3		264	0.2658	54.23		264	0.2456	56.81		264	0.2239	59.71		264	0.218	60.53
265	0.357	43.95		265	0.3501	44.66		265	0.3935	40.42		265	0.3572	43.93		265	0.3171	48.18		265	0.313	48.64		265	0.2697	53.74		265	0.2489	56.38		265	0.2263	59.38		265	0.2199	60.27
266	0.3729	42.37		266	0.3652	43.13		266	0.4067	39.2		266	0.3679	42.86		266	0.3252	47.29		266	0.3197	47.89		266	0.2743	53.17		266	0.2522	55.95		266	0.229	59.02		266	0.2218	60.01
267	0.3894	40.79		267	0.3807	41.62		267	0.42	38.02		267	0.3788	41.81		267	0.3334	46.41		267	0.3266	47.15		267	0.2789	52.61		267	0.2556	55.51		267	0.2315	58.68		267	0.2238	59.73
268	0.4065	39.22		268	0.396	40.18		268	0.4336	36.84		268	0.3897	40.76		268	0.3419	45.51		268	0.3333	46.42		268	0.2835	52.05		268	0.2593	55.05		268	0.2342	58.32		268	0.2258	59.46
269	0.4244	37.64		269	0.4127	38.67		269	0.4489	35.57		269	0.4018	39.65		269	0.3515	44.52		269	0.341	45.61		269	0.2889	51.42		269	0.263	54.57		269	0.2373	57.9		269	0.2283	59.12
270	0.4434	36.03		270	0.4298	37.17		270	0.4646	34.31		270	0.4147	38.49		270	0.3612	43.53		270	0.3493	44.74		270	0.2947	50.74		270	0.2676	54		270	0.2407	57.46		270	0.2309	58.77
271	0.4624	34.48		271	0.447	35.73		271	0.48	33.11		271	0.4276	37.36		271	0.3717	42.49		271	0.3575	43.9		271	0.3007	50.04		271	0.2722	53.44		271	0.2443	56.98		271	0.2336	58.4
272	0.4816	32.99		272	0.4645	34.31		272	0.4962	31.9		272	0.4414	36.19		272	0.3827	41.43		272	0.3666	42.99		272	0.3072	49.29		272	0.2769	52.86		272	0.2478	56.52		272	0.2365	58.01
273	0.4967	31.87		273	0.4784	33.24		273	0.5092	30.96		273	0.4524	35.29		273	0.391	40.64		273	0.3737	42.3		273	0.3121	48.74		273	0.2807	52.4		273	0.2508	56.13		273	0.2387	57.71
274	0.5265	29.75		274	0.5059	31.19		274	0.5341	29.24		274	0.4731	33.65		274	0.4078	39.1		274	0.3873	40.99		274	0.3217	47.68		274	0.2879	51.54		274	0.2563	55.42		274	0.2433	57.1
275	0.5517	28.07		275	0.529	29.58		275	0.5552	27.85		275	0.4905	32.32		275	0.4216	37.88		275	0.3985	39.95		275	0.3296	46.82		275	0.2937	50.85		275	0.2606	54.88		275	0.2468	56.66
276	0.5794	26.34		276	0.5544	27.9		276	0.5786	26.39		276	0.5093	30.95		276	0.4363	36.62		276	0.4108	38.84		276	0.3377	45.95		276	0.2998	50.14		276	0.2654	54.27		276	0.2505	56.17
277	0.6092	24.59		277	0.5824	26.16		277	0.6036	24.91		277	0.5295	29.54		277	0.4522	35.3		277	0.4234	37.73		277	0.3464	45.04		277	0.3065	49.38		277	0.2703	53.67		277	0.2542	55.69
278	0.6406	22.88		278	0.6116	24.46		278	0.6298	23.45		278	0.5507	28.14		278	0.468	34.04		278	0.4365	36.6		278	0.3553	44.13		278	0.3131	48.63		278	0.2754	53.04		278	0.2582	55.18
279	0.673	21.23		279	0.6408	22.87		279	0.6563	22.07		279	0.5713	26.83		279	0.4837	32.83		279	0.4493	35.54		279	0.3641	43.24		279	0.3198	47.89		279	0.2805	52.42		279	0.2621	54.68
280	0.7057	19.69		280	0.671	21.33		280	0.6823	20.78		280	0.5918	25.6		280	0.4997	31.64		280	0.4623	34.49		280	0.3728	42.38		280	0.3259	47.22		280	0.2853	51.84		280	0.266	54.2
281	0.7396	18.21		281	0.7027	19.83		281	0.7103	19.48		281	0.6137	24.34		281	0.5167	30.43		281	0.4756	33.45		281	0.3821	41.49		281	0.333	46.45		281	0.2906	51.22		281	0.2701	53.69
282	0.7735	16.85		282	0.7345	18.43		282	0.7377	18.29		282	0.6353	23.16		282	0.5334	29.28		282	0.4887	32.46		282	0.3914	40.61		282	0.3398	45.73		282	0.2956	50.63		282	0.2738	53.24
283	0.8091	15.52		283	0.7673	17.09		283	0.7658	17.15		283	0.6575	22		283	0.5506	28.14		283	0.502	31.47		283	0.4005	39.76		283	0.3466	45.02		283	0.3004	50.08		283	0.2777	52.76
284	0.845	14.29		284	0.8003	15.84		284	0.7945	16.05		284	0.6799	20.9		284	0.5671	27.1		284	0.5152	30.54		284	0.409	39		284	0.3526	44.4		284	0.3047	49.58		284	0.2807	52.4
285	0.8843	13.05		285	0.836	14.59		285	0.8252	14.95		285	0.7033	19.8		285	0.5843	26.04		285	0.528	29.65		285	0.417	38.28		285	0.3581	43.85		285	0.3085	49.15		285	0.2832	52.09
286	0.9272	11.83		286	0.8755	13.32		286	0.8581	13.86		286	0.7281	18.7		286	0.6011	25.06		286	0.5407	28.79		286	0.424	37.67		286	0.3623	43.42		286	0.3109	48.87		286	0.285	51.88
287	0.9653	10.83		287	0.9109	12.28		287	0.8877	12.95		287	0.7489	17.83		287	0.615	24.26		287	0.5499	28.19		287	0.4286	37.27		287	0.3644	43.21		287	0.3116	48.79		287	0.285	51.88
288	0.9986	10.03		288	0.9415	11.44		288	0.9123	12.24		288	0.7649	17.18		288	0.6242	23.76		288	0.5553	27.84		288	0.43	37.16		288	0.364	43.26		288	0.3107	48.9		288	0.2836	52.05
289	1.0267	9.4		289	0.9679	10.77		289	0.9333	11.66		289	0.7769	16.72		289	0.6296	23.46		289	0.5572	27.72		289	0.4288	37.25		289	0.3617	43.48		289	0.308	49.2		289	0.2807	52.4
290	1.0459	9		290	0.9865	10.32		290	0.9457	11.33		290	0.7819	16.52		290	0.6303	23.43		290	0.5549	27.87		290	0.4248	37.6		290	0.3571	43.94		290	0.3036	49.7		290	0.2767	52.88
291	1.0559	8.79		291	0.9952	10.11		291	0.9499	11.22		291	0.7806	16.57		291	0.6254	23.69		291	0.5485	28.28		291	0.4178	38.21		291	0.351	44.56		291	0.2982	50.33		291	0.2716	53.51
292	1.0523	8.87		292	0.993	10.16		292	0.9441	11.37		292	0.772	16.91		292	0.6158	24.22		292	0.5385	28.94		292	0.409	38.99		292	0.3434	45.35		292	0.2913	51.14		292	0.2662	54.17
293	1.0374	9.18		293	0.9809	10.45		293	0.9295	11.76		293	0.7566	17.52		293	0.6014	25.04		293	0.5251	29.85		293	0.398	40		293	0.3343	46.31		293	0.2835	52.06		293	0.2598	54.98
294	1.0144	9.67		294	0.9588	11		294	0.9067	12.4		294	0.7353	18.4		294	0.5832	26.11		294	0.5091	30.97		294	0.3857	41.15		294	0.3244	47.38		294	0.2755	53.03		294	0.2528	55.87
295	0.9811	10.45		295	0.9287	11.78		295	0.8773	13.26		295	0.7095	19.52		295	0.5621	27.41		295	0.4911	32.28		295	0.3725	42.41		295	0.314	48.53		295	0.2675	54.02		295	0.246	56.76
296	0.9389	11.51		296	0.8902	12.88		296	0.8427	14.36		296	0.6807	20.86		296	0.5385	28.94		296	0.4717	33.75		296	0.3587	43.78		296	0.3033	49.74		296	0.2588	55.1		296	0.2387	57.71
297	0.889	12.91		297	0.8434	14.34		297	0.8011	15.81		297	0.6459	22.6		297	0.512	30.76		297	0.4505	35.44		297	0.3435	45.34		297	0.2919	51.06		297	0.2501	56.22		297	0.2315	58.69
298	0.8354	14.61		298	0.7948	16.04		298	0.7581	17.46		298	0.6115	24.46		298	0.4859	32.67		298	0.4297	37.18		298	0.3293	46.85		298	0.2808	52.38		298	0.2415	57.35		298	0.2244	59.65
299	0.7818	16.53		299	0.7449	17.99		299	0.715	19.27		299	0.5769	26.49		299	0.4599	34.68		299	0.409	39		299	0.3154	48.37		299	0.2708	53.61		299	0.2336	58.4		299	0.2177	60.58
300	0.729	18.66		300	0.6965	20.12		300	0.6723	21.27		300	0.5445	28.54		300	0.4361	36.64		300	0.3904	40.7		300	0.3029	49.78		300	0.2614	54.78		300	0.2264	59.38		300	0.2119	61.39
301	0.6752	21.12		301	0.6463	22.58		301	0.629	23.5		301	0.5116	30.79		301	0.4117	38.75		301	0.3719	42.47		301	0.2906	51.22		301	0.2521	55.96		301	0.2192	60.36		301	0.2061	62.21
302	0.6217	23.9		302	0.5977	25.25		302	0.5875	25.85		302	0.4795	33.15		302	0.389	40.83		302	0.3541	44.24		302	0.2792	52.58		302	0.2438	57.04		302	0.213	61.24		302	0.2008	62.97
303	0.5715	26.82		303	0.5525	28.02		303	0.549	28.25		303	0.4503	35.46		303	0.3678	42.88		303	0.3379	45.93		303	0.2685	53.89		303	0.236	58.07		303	0.207	62.09		303	0.1958	63.7
304	0.526	29.78		304	0.5103	30.88		304	0.5134	30.66		304	0.4238	37.69		304	0.3491	44.76		304	0.3234	47.49		304	0.2592	55.05		304	0.2295	58.95		304	0.2018	62.84		304	0.1916	64.33
305	0.4822	32.95		305	0.4689	33.97		305	0.4789	33.2		305	0.3985	39.94		305	0.3311	46.66		305	0.3099	48.99		305	0.2505	56.17		305	0.223	59.84		305	0.1968	63.56		305	0.1876	64.93
306	0.4409	36.23		306	0.4316	37.02		306	0.4471	35.72		306	0.3758	42.09		306	0.3151	48.4		306	0.2979	50.36		306	0.2429	57.16		306	0.2176	60.59		306	0.1928	64.15		306	0.1844	65.41
307	0.405	39.36		307	0.3982	39.98		307	0.4196	38.05		307	0.3559	44.07		307	0.3013	49.97		307	0.2873	51.6		307	0.2365	58.01		307	0.2129	61.25		307	0.1892	64.68		307	0.1811	65.9
308	0.373	42.36		308	0.369	42.75		308	0.395	40.27		308	0.3386	45.85		308	0.289	51.4		308	0.2784	52.67		308	0.2309	58.76		308	0.2088	61.83		308	0.1861	65.15		308	0.1786	66.28
309	0.3455	45.13		309	0.3433	45.36		309	0.3742	42.25		309	0.3236	47.47		309	0.2791	52.59		309	0.2709	53.6		309	0.2262	59.4		309	0.2055	62.3		309	0.1835	65.54		309	0.1763	66.63
310	0.3242	47.41		310	0.3237	47.46		310	0.3583	43.83		310	0.3124	48.7		310	0.2711	53.57		310	0.2652	54.29		310	0.2225	59.91		310	0.2027	62.7		310	0.1812	65.89		310	0.1744	66.93
311	0.3074	49.27		311	0.3084	49.15		311	0.3457	45.11		311	0.3038	49.68		311	0.2653	54.29		311	0.2609	54.84		311	0.2196	60.31		311	0.2006	63.01		311	0.1797	66.12		311	0.1728	67.17
312	0.2937	50.85		312	0.2958	50.61		312	0.3352	46.22		312	0.2965	50.52		312	0.2599	54.97		312	0.2572	55.31		312	0.2173	60.63		312	0.1984	63.33		312	0.1778	66.4		312	0.1712	67.42
313	0.2829	52.13		313	0.2856	51.81		313	0.3272	47.08		313	0.2908	51.2		313	0.256	55.46		313	0.2543	55.68		313	0.2151	60.94		313	0.1969	63.55		313	0.1766	66.59		313	0.17	67.61
314	0.2738	53.23		314	0.2774	52.79		314	0.3206	47.79		314	0.2861	51.74		314	0.2526	55.9		314	0.2516	56.03		314	0.2134	61.17		314	0.1954	63.77		314	0.1753	66.79		314	0.1685	67.84
315	0.2667	54.12		315	0.2712	53.56		315	0.3151	48.41		315	0.2823	52.2		315	0.2497	56.27		315	0.2495	56.3		315	0.2118	61.41		315	0.194	63.97		315	0.1741	66.98		315	0.1676	67.98
316	0.2603	54.91		316	0.2653	54.29		316	0.3106	48.92		316	0.2792	52.58		316	0.2473	56.59		316	0.2476	56.54		316	0.2102	61.63		316	0.1928	64.15		316	0.173	67.15		316	0.1664	68.17
317	0.2548	55.62		317	0.2601	54.94		317	0.3063	49.4		317	0.2759	52.97		317	0.2448	56.91		317	0.2456	56.8		317	0.209	61.8		317	0.1914	64.36		317	0.1718	67.33		317	0.1654	68.32
318	0.2498	56.27		318	0.2559	55.48		318	0.3025	49.83		318	0.2735	53.27		318	0.2423	57.24		318	0.2439	57.03		318	0.2073	62.05		318	0.1903	64.51		318	0.1705	67.53		318	0.1641	68.53
319	0.2451	56.87		319	0.2517	56.01		319	0.299	50.24		319	0.2708	53.6		319	0.2403	57.51		319	0.2419	57.29		319	0.206	62.23		319	0.1887	64.75		319	0.1692	67.73		319	0.1629	68.73
320	0.2413	57.38		320	0.2482	56.46		320	0.296	50.58		320	0.2686	53.87		320	0.2383	57.77		320	0.2401	57.54		320	0.2044	62.46		320	0.1874	64.95		320	0.1679	67.94		320	0.1614	68.96
321	0.2372	57.92		321	0.2445	56.95		321	0.2928	50.95		321	0.2659	54.21		321	0.2358	58.11		321	0.2377	57.85		321	0.2026	62.72		321	0.1856	65.23		321	0.1661	68.22		321	0.1597	69.23
322	0.2341	58.34		322	0.2418	57.31		322	0.2903	51.25		322	0.264	54.45		322	0.2335	58.42		322	0.2357	58.11		322	0.201	62.94		322	0.1843	65.42		322	0.1651	68.37		322	0.1586	69.4
323	0.231	58.75		323	0.2387	57.71		323	0.2875	51.58		323	0.2616	54.76		323	0.2311	58.74		323	0.2336	58.4		323	0.1992	63.22		323	0.1825	65.69		323	0.1633	68.66		323	0.1569	69.67
324	0.2279	59.17		324	0.2361	58.06		324	0.2847	51.91		324	0.2591	55.07		324	0.2284	59.11		324	0.231	58.75		324	0.1972	63.51		324	0.1805	66		324	0.1616	68.92		324	0.1554	69.92
325	0.2247	59.61		325	0.2333	58.44		325	0.2818	52.27		325	0.2565	55.4		325	0.2255	59.5		325	0.2286	59.07		325	0.1951	63.82		325	0.1787	66.27		325	0.1598	69.21		325	0.1538	70.18
326	0.2209	60.14		326	0.2298	58.9		326	0.2786	52.65		326	0.2534	55.8		326	0.2225	59.91		326	0.2258	59.46		326	0.1927	64.17		326	0.1767	66.57		326	0.1581	69.48		326	0.1523	70.43
327	0.2167	60.72		327	0.2259	59.44		327	0.2747	53.13		327	0.2497	56.27		327	0.2192	60.36		327	0.2232	59.82		327	0.1906	64.48		327	0.1747	66.89		327	0.1561	69.81		327	0.1506	70.7
328	0.2113	61.47		328	0.221	60.12		328	0.2698	53.73		328	0.2454	56.83		328	0.2153	60.91		328	0.2199	60.28		328	0.188	64.87		328	0.1724	67.24		328	0.1543	70.09		328	0.1488	70.99
329	0.2051	62.37		329	0.2152	60.92		329	0.2645	54.39		329	0.2409	57.42		329	0.2113	61.48		329	0.2164	60.76		329	0.1855	65.24		329	0.1703	67.57		329	0.1524	70.4		329	0.1471	71.28
330	0.1976	63.44		330	0.2084	61.89		330	0.2583	55.17		330	0.2355	58.14		330	0.2066	62.14		330	0.213	61.24		330	0.1829	65.63		330	0.1682	67.89		330	0.1508	70.67		330	0.1458	71.48
331	0.1891	64.71		331	0.2005	63.03		331	0.2513	56.07		331	0.2299	58.9		331	0.2022	62.78		331	0.209	61.81		331	0.1799	66.09		331	0.1659	68.25		331	0.1488	70.99		331	0.1437	71.83
332	0.1793	66.18		332	0.1917	64.31		332	0.2432	57.12		332	0.2232	59.81		332	0.1969	63.55		332	0.205	62.38		332	0.1771	66.52		332	0.1634	68.64		332	0.1467	71.34		332	0.142	72.1
333	0.1686	67.83		333	0.182	65.76		333	0.2345	58.28		333	0.2166	60.73		333	0.1917	64.31		333	0.2005	63.03		333	0.1741	66.98		333	0.1612	68.99		333	0.145	71.61		333	0.1403	72.4
334	0.1581	69.49		334	0.1724	67.24		334	0.2264	59.37		334	0.21	61.66		334	0.187	65.02		334	0.1968	63.56		334	0.1715	67.38		334	0.1592	69.32		334	0.1432	71.91		334	0.1389	72.62
335	0.1472	71.25		335	0.1624	68.8		335	0.2179	60.54		335	0.2034	62.6		335	0.1821	65.76		335	0.193	64.12		335	0.1689	67.78		335	0.1572	69.63		335	0.1415	72.19		335	0.1375	72.85
336	0.1367	72.99		336	0.1529	70.32		336	0.2098	61.69		336	0.1977	63.44		336	0.1775	66.45		336	0.1898	64.6		336	0.1663	68.18		336	0.1552	69.95		336	0.1401	72.42		336	0.136	73.11
337	0.1269	74.67		337	0.1442	71.75		337	0.2023	62.76		337	0.1918	64.3		337	0.1734	67.08		337	0.1864	65.1		337	0.1641	68.53		337	0.1534	70.24		337	0.1384	72.7		337	0.1347	73.33
338	0.118	76.21		338	0.1359	73.12		338	0.1954	63.77		338	0.1866	65.07		338	0.1694	67.7		338	0.1829	65.63		338	0.1619	68.89		338	0.1518	70.5		338	0.1373	72.9		338	0.133	73.62
339	0.1123	77.21		339	0.1305	74.05		339	0.1908	64.45		339	0.1831	65.6		339	0.1669	68.1		339	0.181	65.92		339	0.1605	69.1		339	0.1503	70.75		339	0.1359	73.13		339	0.1323	73.75
340	0.1011	79.23		340	0.1207	75.74		340	0.1819	65.77		340	0.1758	66.71		340	0.1613	68.97		340	0.1776	66.44		340	0.158	69.49		340	0.1482	71.09		340	0.134	73.46		340	0.1304	74.06
341	0.0945	80.44		341	0.1147	76.79		341	0.1769	66.54		341	0.1722	67.26		341	0.1583	69.46		341	0.1751	66.83		341	0.1566	69.73		341	0.1469	71.3		341	0.1328	73.66		341	0.1289	74.31
342	0.0886	81.54		342	0.1092	77.76		342	0.1722	67.26		342	0.1686	67.83		342	0.1554	69.91		342	0.1729	67.16		342	0.1549	70		342	0.1453	71.57		342	0.1315	73.87		342	0.1278	74.51
343	0.0833	82.54		343	0.1047	78.59		343	0.1685	67.84		343	0.1658	68.27		343	0.1536	70.21		343	0.1712	67.42		343	0.1538	70.18		343	0.1442	71.74		343	0.1307	74.01		343	0.1268	74.68
344	0.0788	83.41		344	0.1002	79.39		344	0.1646	68.45		344	0.1629	68.73		344	0.1512	70.6		344	0.1695	67.69		344	0.1522	70.44		344	0.1429	71.96		344	0.1294	74.23		344	0.1256	74.88
345	0.0745	84.24		345	0.0963	80.11		345	0.1617	68.91		345	0.1603	69.13		345	0.1491	70.94		345	0.168	67.92		345	0.1511	70.62		345	0.1421	72.1		345	0.1288	74.34		345	0.1249	75.01
346	0.0702	85.08		346	0.0924	80.83		346	0.1581	69.48		346	0.1576	69.56		346	0.147	71.28		346	0.166	68.23		346	0.1497	70.85		346	0.1408	72.31		346	0.1277	74.52		346	0.1238	75.19
347	0.0669	85.73		347	0.0895	81.38		347	0.1556	69.89		347	0.1555	69.91		347	0.1455	71.54		347	0.1646	68.45		347	0.1487	71.01		347	0.1399	72.46		347	0.1268	74.68		347	0.123	75.34
348	0.0638	86.35		348	0.0867	81.91		348	0.153	70.31		348	0.1536	70.22		348	0.144	71.77		348	0.1634	68.65		348	0.1478	71.15		348	0.1389	72.63		348	0.1258	74.86		348	0.1222	75.48
349	0.0612	86.85		349	0.0846	82.3		349	0.1512	70.59		349	0.1522	70.44		349	0.1428	71.97		349	0.1624	68.81		349	0.1471	71.27		349	0.1382	72.74		349	0.1254	74.93		349	0.1215	75.6
350	0.0586	87.37		350	0.0821	82.78		350	0.1491	70.94		350	0.1506	70.7		350	0.1416	72.18		350	0.1613	68.97		350	0.1462	71.41		350	0.1374	72.88		350	0.1245	75.07		350	0.1207	75.74
351	0.0564	87.81		351	0.0802	83.14		351	0.1475	71.21		351	0.1492	70.92		351	0.1402	72.41		351	0.1605	69.1		351	0.1454	71.56		351	0.1368	72.98		351	0.124	75.17		351	0.12	75.86
352	0.0542	88.27		352	0.0782	83.52		352	0.1458	71.49		352	0.1477	71.17		352	0.1393	72.56		352	0.1594	69.27		352	0.1447	71.67		352	0.1361	73.09		352	0.1231	75.32		352	0.1193	75.98
353	0.0522	88.67		353	0.0764	83.87		353	0.1442	71.75		353	0.1466	71.34		353	0.1383	72.72		353	0.1587	69.39		353	0.144	71.79		353	0.1352	73.25		353	0.1225	75.42		353	0.1186	76.1
354	0.0504	89.04		354	0.0747	84.19		354	0.1426	72		354	0.1453	71.56		354	0.1372	72.92		354	0.1578	69.53		354	0.1433	71.89		354	0.1345	73.36		354	0.1219	75.52		354	0.118	76.21
355	0.0488	89.37		355	0.0731	84.51		355	0.1413	72.23		355	0.1442	71.74		355	0.1364	73.05		355	0.1569	69.68		355	0.1428	71.98		355	0.1339	73.47		355	0.1213	75.63		355	0.1174	76.32
356	0.0469	89.77		356	0.0716	84.8		356	0.1399	72.46		356	0.1433	71.89		356	0.1356	73.19		356	0.1562	69.79		356	0.1421	72.1		356	0.1335	73.54		356	0.1208	75.72		356	0.1168	76.41
357	0.0454	90.08		357	0.07	85.11		357	0.1386	72.67		357	0.1422	72.08		357	0.1347	73.34		357	0.1555	69.9		357	0.1415	72.19		357	0.133	73.62		357	0.1201	75.85		357	0.1163	76.51
358	0.0439	90.39		358	0.0689	85.33		358	0.1376	72.85		358	0.1414	72.22		358	0.1339	73.47		358	0.155	69.99		358	0.1408	72.3		358	0.1325	73.71		358	0.1198	75.9		358	0.1158	76.59
359	0.0424	90.69		359	0.0675	85.61		359	0.1365	73.04		359	0.1405	72.37		359	0.133	73.63		359	0.1544	70.09		359	0.1405	72.36		359	0.1318	73.82		359	0.1192	76		359	0.1151	76.71
360	0.0414	90.9		360	0.0665	85.81		360	0.1357	73.17		360	0.1397	72.49		360	0.1324	73.72		360	0.1539	70.17		360	0.1401	72.43		360	0.1314	73.9		360	0.1189	76.04		360	0.1145	76.82
361	0.0403	91.15		361	0.0657	85.97		361	0.1349	73.31		361	0.1391	72.59		361	0.1319	73.81		361	0.1532	70.27		361	0.1396	72.5		361	0.131	73.95		361	0.1184	76.14		361	0.1141	76.9
362	0.0394	91.33		362	0.0648	86.15		362	0.1339	73.47		362	0.1384	72.7		362	0.1313	73.91		362	0.1527	70.36		362	0.1391	72.6		362	0.1306	74.04		362	0.1179	76.23		362	0.1138	76.95
363	0.0387	91.48		363	0.0639	86.32		363	0.1332	73.58		363	0.1378	72.81		363	0.1306	74.03		363	0.1523	70.43		363	0.1388	72.65		363	0.1301	74.12		363	0.1175	76.3		363	0.1133	77.03
364	0.038	91.63		364	0.0633	86.43		364	0.1327	73.67		364	0.1373	72.89		364	0.13	74.13		364	0.1516	70.53		364	0.1384	72.71		364	0.1295	74.22		364	0.1169	76.39		364	0.1126	77.16
365	0.0373	91.77		365	0.0628	86.54		365	0.132	73.79		365	0.1367	73		365	0.1294	74.23		365	0.151	70.63		365	0.1378	72.81		365	0.1291	74.28		365	0.1163	76.5		365	0.1122	77.24
366	0.0367	91.9		366	0.0625	86.6		366	0.1316	73.86		366	0.1363	73.07		366	0.1288	74.33		366	0.1506	70.7		366	0.1373	72.9		366	0.1285	74.39		366	0.1158	76.6		366	0.1115	77.36
367	0.0365	91.93		367	0.062	86.7		367	0.1311	73.95		367	0.1357	73.17		367	0.1282	74.43		367	0.15	70.8		367	0.1368	72.98		367	0.128	74.48		367	0.1153	76.69		367	0.1111	77.43
368	0.036	92.04		368	0.0616	86.77		368	0.1306	74.03		368	0.1352	73.24		368	0.1276	74.54		368	0.1495	70.87		368	0.1361	73.1		368	0.1273	74.6		368	0.1147	76.79		368	0.1105	77.54
369	0.0359	92.07		369	0.0617	86.77		369	0.1305	74.05		369	0.1349	73.3		369	0.1272	74.61		369	0.1489	70.97		369	0.1358	73.15		369	0.127	74.64		369	0.1142	76.88		369	0.11	77.63
370	0.0357	92.11		370	0.0615	86.8		370	0.1299	74.14		370	0.1344	73.38		370	0.1267	74.69		370	0.1486	71.02		370	0.1353	73.23		370	0.1265	74.72		370	0.1138	76.95		370	0.1095	77.71
371	0.0356	92.13		371	0.0616	86.78		371	0.1302	74.1		371	0.1343	73.4		371	0.1259	74.83		371	0.1482	71.08		371	0.1349	73.3		371	0.126	74.81		371	0.1134	77.01		371	0.1088	77.84
372	0.0357	92.12		372	0.0615	86.79		372	0.1299	74.14		372	0.134	73.45		372	0.1252	74.95		372	0.1478	71.15		372	0.1346	73.36		372	0.1255	74.9		372	0.1129	77.11		372	0.1083	77.92
373	0.0356	92.12		373	0.0616	86.77		373	0.1298	74.17		373	0.1337	73.5		373	0.125	75		373	0.1475	71.2		373	0.1341	73.43		373	0.1253	74.93		373	0.1125	77.18		373	0.108	77.99
374	0.0355	92.14		374	0.0615	86.8		374	0.1294	74.24		374	0.1333	73.57		374	0.1244	75.09		374	0.1469	71.3		374	0.1336	73.52		374	0.1245	75.07		374	0.1119	77.29		374	0.1073	78.1
375	0.0355	92.15		375	0.0617	86.76		375	0.1294	74.24		375	0.1332	73.58		375	0.1242	75.14		375	0.1467	71.33		375	0.1333	73.57		375	0.1242	75.12		375	0.1116	77.35		375	0.1069	78.18
376	0.0357	92.1		376	0.0617	86.75		376	0.129	74.3		376	0.1331	73.61		376	0.1237	75.21		376	0.1461	71.43		376	0.1328	73.66		376	0.1237	75.21		376	0.1111	77.43		376	0.1064	78.26
377	0.0358	92.08		377	0.0618	86.73		377	0.129	74.31		377	0.1329	73.64		377	0.1232	75.29		377	0.1459	71.47		377	0.1324	73.72		377	0.1234	75.27		377	0.1106	77.51		377	0.106	78.34
378	0.0358	92.09		378	0.0619	86.72		378	0.1288	74.33		378	0.1327	73.66		378	0.1229	75.35		378	0.1455	71.54		378	0.132	73.79		378	0.1228	75.37		378	0.1102	77.59		378	0.1054	78.45
379	0.036	92.05		379	0.0619	86.71		379	0.1288	74.33		379	0.1325	73.7		379	0.1226	75.4		379	0.1451	71.59		379	0.1316	73.86		379	0.1225	75.42		379	0.1098	77.66		379	0.1051	78.5
380	0.0361	92.02		380	0.0622	86.66		380	0.1289	74.32		380	0.1326	73.69		380	0.1223	75.46		380	0.1449	71.63		380	0.1314	73.89		380	0.1222	75.48		380	0.1094	77.73		380	0.1046	78.59
381	0.0363	91.99		381	0.0623	86.64		381	0.1287	74.36		381	0.1323	73.73		381	0.1219	75.53		381	0.1446	71.69		381	0.1308	74		381	0.1216	75.58		381	0.109	77.8		381	0.1041	78.7
382	0.0364	91.95		382	0.0623	86.63		382	0.1286	74.38		382	0.1321	73.77		382	0.1213	75.63		382	0.1441	71.77		382	0.1304	74.06		382	0.1211	75.66		382	0.1083	77.92		382	0.1036	78.78
383	0.0368	91.87		383	0.0628	86.54		383	0.1287	74.35		383	0.132	73.79		383	0.121	75.69		383	0.1438	71.81		383	0.13	74.13		383	0.1206	75.75		383	0.1081	77.97		383	0.1032	78.86
384	0.037	91.84		384	0.063	86.5		384	0.1288	74.34		384	0.1317	73.84		384	0.1204	75.78		384	0.1433	71.9		384	0.1295	74.22		384	0.1202	75.83		384	0.1074	78.1		384	0.1027	78.95
385	0.0375	91.73		385	0.0634	86.42		385	0.1289	74.32		385	0.1318	73.82		385	0.12	75.85		385	0.1429	71.96		385	0.1292	74.26		385	0.1198	75.9		385	0.1071	78.15		385	0.1021	79.05
386	0.0378	91.66		386	0.0637	86.36		386	0.1289	74.31		386	0.1318	73.83		386	0.1197	75.91		386	0.1425	72.02		386	0.1288	74.33		386	0.1195	75.94		386	0.1068	78.2		386	0.102	79.07
387	0.0384	91.54		387	0.0644	86.22		387	0.1293	74.25		387	0.1318	73.82		387	0.1192	76.01		387	0.1423	72.06		387	0.1285	74.4		387	0.1191	76.02		387	0.1064	78.27		387	0.1016	79.15
388	0.0388	91.45		388	0.0646	86.17		388	0.1292	74.27		388	0.1316	73.86		388	0.1185	76.12		388	0.1417	72.16		388	0.1279	74.49		388	0.1186	76.11		388	0.1059	78.37		388	0.1009	79.26
389	0.039	91.41		389	0.065	86.1		389	0.1293	74.25		389	0.1314	73.89		389	0.1181	76.19		389	0.1413	72.23		389	0.1275	74.55		389	0.1181	76.19		389	0.1056	78.42		389	0.1006	79.33
390	0.0393	91.35		390	0.0653	86.04		390	0.1291	74.29		390	0.1312	73.93		390	0.1175	76.3		390	0.1407	72.32		390	0.1269	74.66		390	0.1177	76.26		390	0.1051	78.5		390	0.1001	79.42
391	0.0394	91.33		391	0.0654	86.02		391	0.1289	74.32		391	0.1309	73.98		391	0.1168	76.41		391	0.1403	72.4		391	0.1265	74.74		391	0.1171	76.37		391	0.1045	78.62		391	0.0996	79.5
392	0.0395	91.3		392	0.0655	86		392	0.1288	74.34		392	0.1306	74.03		392	0.1163	76.5		392	0.1399	72.46		392	0.1261	74.81		392	0.1167	76.43		392	0.1042	78.66		392	0.0993	79.56
393	0.0394	91.33		393	0.0652	86.05		393	0.1285	74.39		393	0.13	74.13		393	0.1157	76.61		393	0.1393	72.56		393	0.1256	74.89		393	0.1162	76.53		393	0.1036	78.77		393	0.0986	79.68
394	0.0392	91.37		394	0.0652	86.06		394	0.128	74.47		394	0.1296	74.2		394	0.1152	76.71		394	0.1389	72.62		394	0.1253	74.95		394	0.1158	76.6		394	0.1033	78.82		394	0.0984	79.73
395	0.0389	91.42		395	0.065	86.11		395	0.1277	74.53		395	0.1292	74.26		395	0.1144	76.84		395	0.1384	72.72		395	0.1249	75		395	0.1154	76.66		395	0.1031	78.87		395	0.098	79.8
396	0.0385	91.52		396	0.0645	86.19		396	0.1273	74.6		396	0.1286	74.37		396	0.1139	76.93		396	0.1379	72.8		396	0.1246	75.06		396	0.1152	76.71		396	0.1027	78.93		396	0.0978	79.83
397	0.038	91.62		397	0.0641	86.28		397	0.1267	74.7		397	0.1282	74.43		397	0.1135	77		397	0.1376	72.84		397	0.1242	75.13		397	0.1149	76.75		397	0.1025	78.98		397	0.0975	79.9
398	0.0372	91.79		398	0.0632	86.45		398	0.1259	74.84		398	0.1276	74.54		398	0.1129	77.11		398	0.1372	72.9		398	0.1238	75.19		398	0.1146	76.81		398	0.1022	79.03		398	0.0973	79.94
399	0.0364	91.95		399	0.0627	86.57		399	0.1253	74.94		399	0.127	74.64		399	0.1124	77.2		399	0.1369	72.96		399	0.1235	75.25		399	0.1144	76.85		399	0.102	79.07		399	0.0969	80
400	0.0353	92.18		400	0.0618	86.73		400	0.1245	75.07		400	0.1264	74.76		400	0.1118	77.31		400	0.1365	73.03		400	0.1232	75.3		400	0.1141	76.9		400	0.1018	79.11		400	0.0966	80.05
401	0.0343	92.4		401	0.0608	86.93		401	0.1237	75.22		401	0.1258	74.86		401	0.1113	77.4		401	0.1361	73.1		401	0.1229	75.35		401	0.1139	76.94		401	0.1015	79.16		401	0.0964	80.1
402	0.0333	92.63		402	0.0598	87.14		402	0.1227	75.39		402	0.125	74.99		402	0.1108	77.49		402	0.1356	73.19		402	0.1225	75.43		402	0.1134	77.02		402	0.1012	79.21		402	0.0961	80.16
403	0.0322	92.85		403	0.0587	87.36		403	0.1218	75.55		403	0.1245	75.08		403	0.1102	77.59		403	0.1353	73.24		403	0.1223	75.45		403	0.1134	77.03		403	0.101	79.24		403	0.0961	80.16
404	0.031	93.11		404	0.0577	87.55		404	0.121	75.69		404	0.1239	75.17		404	0.1099	77.65		404	0.1351	73.26		404	0.1221	75.49		404	0.1132	77.06		404	0.1009	79.26		404	0.0958	80.21
405	0.0296	93.41		405	0.0564	87.83		405	0.1199	75.87		405	0.1231	75.32		405	0.1092	77.76		405	0.1346	73.35		405	0.1217	75.55		405	0.1128	77.13		405	0.1007	79.31		405	0.0955	80.25
406	0.0282	93.71		406	0.0551	88.09		406	0.1189	76.05		406	0.1224	75.44		406	0.1088	77.84		406	0.1344	73.38		406	0.1216	75.58		406	0.1126	77.16		406	0.1004	79.35		406	0.0952	80.31
407	0.027	93.97		407	0.0541	88.29		407	0.1181	76.19		407	0.122	75.51		407	0.1086	77.88		407	0.1342	73.43		407	0.1215	75.6		407	0.1125	77.18		407	0.1004	79.37		407	0.0952	80.32
408	0.026	94.19		408	0.053	88.52		408	0.1173	76.34		408	0.1214	75.61		408	0.1081	77.96		408	0.1339	73.48		408	0.1213	75.63		408	0.1124	77.2		408	0.1002	79.39		408	0.095	80.35
409	0.025	94.41		409	0.0522	88.68		409	0.1166	76.46		409	0.1212	75.65		409	0.1079	77.99		409	0.1338	73.48		409	0.1213	75.63		409	0.1123	77.21		409	0.1002	79.4		409	0.0949	80.38
410	0.0242	94.59		410	0.0514	88.83		410	0.116	76.56		410	0.1207	75.73		410	0.1077	78.03		410	0.1337	73.5		410	0.1212	75.65		410	0.1122	77.24		410	0.1001	79.41		410	0.0948	80.39
411	0.0234	94.74		411	0.0508	88.96		411	0.1154	76.66		411	0.1206	75.76		411	0.1076	78.05		411	0.1337	73.5		411	0.1212	75.64		411	0.1122	77.23		411	0.1	79.44		411	0.0947	80.41
412	0.0228	94.9		412	0.0502	89.09		412	0.115	76.74		412	0.1202	75.82		412	0.1074	78.09		412	0.1336	73.52		412	0.121	75.68		412	0.112	77.26		412	0.0998	79.46		412	0.0945	80.45
413	0.0222	95.01		413	0.0497	89.19		413	0.1147	76.79		413	0.1201	75.84		413	0.1074	78.1		413	0.1336	73.51		413	0.121	75.68		413	0.1121	77.25		413	0.0998	79.47		413	0.0944	80.47
414	0.0219	95.08		414	0.0493	89.26		414	0.1145	76.83		414	0.1201	75.84		414	0.1073	78.12		414	0.1337	73.5		414	0.121	75.68		414	0.112	77.27		414	0.0998	79.47		414	0.0944	80.47
415	0.0216	95.16		415	0.0491	89.32		415	0.1144	76.84		415	0.12	75.85		415	0.1072	78.13		415	0.1338	73.49		415	0.1211	75.67		415	0.112	77.27		415	0.0998	79.47		415	0.0943	80.49
416	0.0213	95.21		416	0.0489	89.35		416	0.1142	76.88		416	0.1199	75.87		416	0.1072	78.13		416	0.1338	73.49		416	0.1211	75.67		416	0.1119	77.28		416	0.0997	79.49		416	0.0942	80.5
417	0.0211	95.27		417	0.0487	89.39		417	0.114	76.91		417	0.12	75.86		417	0.1071	78.14		417	0.1337	73.51		417	0.1211	75.66		417	0.1118	77.3		417	0.0996	79.51		417	0.0941	80.53
418	0.0211	95.26		418	0.0486	89.41		418	0.1141	76.9		418	0.1201	75.84		418	0.1072	78.13		418	0.1338	73.48		418	0.1211	75.67		418	0.1119	77.28		418	0.0996	79.51		418	0.0941	80.53
419	0.0211	95.25		419	0.0487	89.39		419	0.1142	76.88		419	0.1202	75.82		419	0.1074	78.09		419	0.134	73.45		419	0.1214	75.62		419	0.1121	77.26		419	0.0997	79.49		419	0.094	80.53
420	0.0212	95.24		420	0.0488	89.38		420	0.1142	76.87		420	0.1203	75.8		420	0.1075	78.08		420	0.1342	73.42		420	0.1213	75.62		420	0.1121	77.24		420	0.0996	79.51		420	0.094	80.53
421	0.0214	95.2		421	0.0488	89.37		421	0.1143	76.86		421	0.1205	75.77		421	0.1075	78.08		421	0.1344	73.39		421	0.1215	75.59		421	0.1121	77.25		421	0.0996	79.51		421	0.0939	80.56
422	0.0215	95.17		422	0.0491	89.31		422	0.1146	76.8		422	0.1207	75.73		422	0.1078	78.02		422	0.1346	73.35		422	0.1216	75.57		422	0.1122	77.23		422	0.0997	79.49		422	0.0939	80.55
423	0.0218	95.1		423	0.0494	89.25		423	0.1147	76.78		423	0.121	75.68		423	0.108	77.98		423	0.1347	73.34		423	0.1218	75.54		423	0.1123	77.21		423	0.0997	79.49		423	0.094	80.54
424	0.022	95.06		424	0.0496	89.21		424	0.115	76.74		424	0.1213	75.64		424	0.1082	77.95		424	0.1349	73.31		424	0.1219	75.52		424	0.1122	77.23		424	0.0997	79.49		424	0.0939	80.55
425	0.0223	94.99		425	0.0498	89.17		425	0.1152	76.7		425	0.1215	75.59		425	0.1083	77.92		425	0.1349	73.3		425	0.122	75.51		425	0.1124	77.2		425	0.0997	79.48		425	0.0939	80.55
426	0.0227	94.92		426	0.0501	89.1		426	0.1154	76.66		426	0.1218	75.54		426	0.1085	77.9		426	0.1351	73.26		426	0.1221	75.48		426	0.1125	77.19		426	0.0996	79.5		426	0.0939	80.56
427	0.0231	94.82		427	0.0505	89.02		427	0.1158	76.6		427	0.1222	75.47		427	0.1088	77.84		427	0.1354	73.21		427	0.1223	75.45		427	0.1126	77.17		427	0.0998	79.47		427	0.094	80.55
428	0.0234	94.75		428	0.0508	88.95		428	0.1162	76.53		428	0.1225	75.41		428	0.109	77.81		428	0.1357	73.16		428	0.1224	75.43		428	0.1126	77.16		428	0.0998	79.47		428	0.094	80.54
429	0.0238	94.66		429	0.0511	88.89		429	0.1164	76.48		429	0.1228	75.37		429	0.1092	77.77		429	0.1359	73.13		429	0.1226	75.41		429	0.1127	77.15		429	0.0998	79.47		429	0.0939	80.55
430	0.0243	94.55		430	0.0516	88.8		430	0.1169	76.4		430	0.1232	75.3		430	0.1095	77.71		430	0.1362	73.08		430	0.1227	75.38		430	0.1129	77.11		430	0.0998	79.47		430	0.094	80.53
431	0.0248	94.45		431	0.0521	88.69		431	0.1174	76.32		431	0.1237	75.22		431	0.1099	77.64		431	0.1365	73.03		431	0.1229	75.35		431	0.113	77.09		431	0.0999	79.46		431	0.0941	80.52
432	0.0252	94.35		432	0.0525	88.61		432	0.1177	76.26		432	0.1239	75.18		432	0.1101	77.61		432	0.1368	72.99		432	0.1231	75.32		432	0.113	77.08		432	0.1	79.44		432	0.094	80.53
433	0.0257	94.25		433	0.0529	88.53		433	0.1182	76.18		433	0.1242	75.13		433	0.1103	77.56		433	0.1371	72.93		433	0.1232	75.3		433	0.1132	77.06		433	0.1	79.43		433	0.0941	80.52
434	0.0263	94.13		434	0.0535	88.41		434	0.1187	76.09		434	0.1248	75.02		434	0.1107	77.5		434	0.1375	72.87		434	0.1236	75.24		434	0.1134	77.02		434	0.1001	79.41		434	0.0942	80.49
435	0.0269	93.99		435	0.0541	88.29		435	0.1192	76		435	0.1253	74.94		435	0.1112	77.41		435	0.1378	72.81		435	0.1238	75.2		435	0.1135	77		435	0.1003	79.37		435	0.0943	80.49
436	0.0276	93.85		436	0.0546	88.18		436	0.1197	75.92		436	0.1258	74.85		436	0.1116	77.34		436	0.138	72.77		436	0.124	75.16		436	0.1138	76.94		436	0.1003	79.37		436	0.0944	80.47
437	0.028	93.75		437	0.0552	88.07		437	0.1201	75.84		437	0.1261	74.79		437	0.1119	77.29		437	0.1383	72.73		437	0.1242	75.13		437	0.1138	76.95		437	0.1005	79.34		437	0.0944	80.47
438	0.0287	93.61		438	0.0556	87.97		438	0.1205	75.76		438	0.1267	74.69		438	0.1122	77.23		438	0.1385	72.69		438	0.1244	75.09		438	0.114	76.91		438	0.1005	79.35		438	0.0945	80.44
439	0.0293	93.47		439	0.0563	87.84		439	0.1212	75.66		439	0.1272	74.6		439	0.1127	77.14		439	0.139	72.62		439	0.1247	75.03		439	0.1143	76.86		439	0.1008	79.29		439	0.0946	80.42
440	0.0299	93.34		440	0.0568	87.73		440	0.1218	75.54		440	0.1277	74.52		440	0.113	77.09		440	0.1393	72.55		440	0.125	74.99		440	0.1144	76.84		440	0.1009	79.27		440	0.0947	80.42
441	0.0305	93.22		441	0.0574	87.62		441	0.1222	75.48		441	0.1282	74.43		441	0.1134	77.02		441	0.1396	72.51		441	0.1251	74.97		441	0.1144	76.84		441	0.1008	79.28		441	0.0946	80.43
442	0.0312	93.06		442	0.0581	87.48		442	0.1228	75.37		442	0.1286	74.36		442	0.1139	76.94		442	0.14	72.44		442	0.1254	74.92		442	0.1146	76.81		442	0.1009	79.26		442	0.0947	80.4
443	0.032	92.89		443	0.0587	87.36		443	0.1235	75.25		443	0.1293	74.24		443	0.1143	76.85		443	0.1404	72.37		443	0.1258	74.85		443	0.1148	76.77		443	0.1011	79.23		443	0.0948	80.39
444	0.0329	92.71		444	0.0595	87.2		444	0.1242	75.12		444	0.1299	74.15		444	0.1149	76.75		444	0.1409	72.29		444	0.1261	74.8		444	0.1152	76.71		444	0.1013	79.2		444	0.095	80.35
445	0.0337	92.54		445	0.0603	87.04		445	0.1248	75.02		445	0.1305	74.05		445	0.1153	76.69		445	0.1413	72.23		445	0.1264	74.75		445	0.1153	76.69		445	0.1016	79.15		445	0.0952	80.32
446	0.0346	92.34		446	0.0611	86.87		446	0.1256	74.88		446	0.1311	73.95		446	0.1158	76.59		446	0.1417	72.15		446	0.1268	74.68		446	0.1156	76.63		446	0.1017	79.12		446	0.0954	80.29
447	0.0354	92.18		447	0.0618	86.74		447	0.1263	74.76		447	0.1315	73.87		447	0.1163	76.51		447	0.1422	72.08		447	0.127	74.64		447	0.1158	76.59		447	0.1018	79.1		447	0.0955	80.27
448	0.0362	92		448	0.0625	86.59		448	0.127	74.65		448	0.1322	73.75		448	0.1168	76.41		448	0.1425	72.02		448	0.1273	74.59		448	0.116	76.56		448	0.102	79.08		448	0.0955	80.25
449	0.0371	91.81		449	0.0634	86.41		449	0.1279	74.5		449	0.1329	73.63		449	0.1174	76.31		449	0.143	71.95		449	0.1277	74.53		449	0.1163	76.51		449	0.1022	79.03		449	0.0957	80.22
450	0.0378	91.67		450	0.064	86.29		450	0.1283	74.42		450	0.1334	73.56		450	0.1179	76.23		450	0.1434	71.89		450	0.1279	74.5		450	0.1165	76.48		450	0.1023	79.01		450	0.0958	80.2
451	0.0391	91.39		451	0.0654	86.02		451	0.1293	74.24		451	0.1347	73.33		451	0.1191	76.02		451	0.1437	71.83		451	0.1286	74.37		451	0.1167	76.44		451	0.1027	78.95		451	0.0962	80.13
452	0.0401	91.19		452	0.0663	85.85		452	0.1301	74.11		452	0.1354	73.22		452	0.1196	75.92		452	0.1441	71.76		452	0.1288	74.34		452	0.117	76.38		452	0.1027	78.95		452	0.0963	80.11
453	0.0412	90.96		453	0.0672	85.66		453	0.131	73.96		453	0.1361	73.09		453	0.1204	75.8		453	0.1448	71.65		453	0.1293	74.26		453	0.1174	76.31		453	0.1031	78.87		453	0.0966	80.05
454	0.0421	90.76		454	0.068	85.5		454	0.1316	73.85		454	0.1367	72.99		454	0.1208	75.72		454	0.1452	71.59		454	0.1295	74.21		454	0.1176	76.28		454	0.1032	78.85		454	0.0968	80.03
455	0.0429	90.6		455	0.0688	85.35		455	0.1324	73.72		455	0.1373	72.89		455	0.1212	75.65		455	0.1455	71.53		455	0.1298	74.16		455	0.1177	76.26		455	0.1033	78.83		455	0.0968	80.02
456	0.0438	90.4		456	0.0697	85.17		456	0.1331	73.6		456	0.1379	72.8		456	0.1217	75.56		456	0.1458	71.48		456	0.1301	74.11		456	0.1179	76.23		456	0.1035	78.8		456	0.0969	80.01
457	0.0449	90.18		457	0.0705	85.01		457	0.1339	73.47		457	0.1387	72.67		457	0.1224	75.44		457	0.1465	71.37		457	0.1306	74.03		457	0.1182	76.17		457	0.1037	78.76		457	0.097	79.98
458	0.0459	89.96		458	0.0716	84.8		458	0.1349	73.31		458	0.1395	72.53		458	0.1231	75.32		458	0.1471	71.27		458	0.131	73.96		458	0.1186	76.1		458	0.1041	78.69		458	0.0974	79.9
459	0.047	89.75		459	0.0725	84.63		459	0.1356	73.18		459	0.1402	72.41		459	0.1236	75.23		459	0.1476	71.18		459	0.1314	73.9		459	0.1189	76.05		459	0.1043	78.65		459	0.0975	79.89
460	0.0477	89.59		460	0.0732	84.49		460	0.1363	73.07		460	0.1406	72.34		460	0.1241	75.15		460	0.1481	71.11		460	0.1315	73.87		460	0.119	76.03		460	0.1044	78.63		460	0.0976	79.87
461	0.0487	89.4		461	0.074	84.34		461	0.1369	72.96		461	0.1411	72.25		461	0.1244	75.09		461	0.1483	71.06		461	0.1319	73.81		461	0.1191	76.01		461	0.1045	78.62		461	0.0978	79.84
462	0.0497	89.19		462	0.0749	84.16		462	0.1378	72.81		462	0.1419	72.13		462	0.1251	74.97		462	0.149	70.96		462	0.1323	73.74		462	0.1196	75.93		462	0.1047	78.57		462	0.0981	79.78
463	0.0507	88.98		463	0.0758	83.98		463	0.1388	72.64		463	0.1428	71.98		463	0.1258	74.86		463	0.1496	70.87		463	0.1327	73.67		463	0.1199	75.88		463	0.105	78.51		463	0.0982	79.76
464	0.0517	88.79		464	0.0767	83.81		464	0.1395	72.53		464	0.1434	71.87		464	0.1263	74.77		464	0.15	70.79		464	0.1331	73.6		464	0.1201	75.84		464	0.1053	78.47		464	0.0984	79.73
465	0.0527	88.58		465	0.0776	83.64		465	0.1403	72.4		465	0.1441	71.77		465	0.1268	74.68		465	0.1505	70.72		465	0.1334	73.56		465	0.1204	75.79		465	0.1055	78.44		465	0.0985	79.7
466	0.0537	88.36		466	0.0785	83.46		466	0.1412	72.25		466	0.1448	71.64		466	0.1275	74.57		466	0.1511	70.62		466	0.1339	73.47		466	0.1206	75.75		466	0.1056	78.41		466	0.0987	79.67
467	0.0549	88.13		467	0.0796	83.25		467	0.1421	72.1		467	0.1457	71.5		467	0.1282	74.45		467	0.1517	70.52		467	0.1343	73.4		467	0.121	75.68		467	0.106	78.35		467	0.099	79.62
468	0.056	87.91		468	0.0806	83.06		468	0.143	71.95		468	0.1465	71.37		468	0.1288	74.33		468	0.1523	70.41		468	0.1348	73.32		468	0.1213	75.63		468	0.1063	78.28		468	0.0992	79.58
469	0.057	87.71		469	0.0814	82.9		469	0.1438	71.82		469	0.1471	71.26		469	0.1293	74.25		469	0.1528	70.34		469	0.1351	73.26		469	0.1216	75.58		469	0.1065	78.25		469	0.0993	79.55
470	0.058	87.51		470	0.0824	82.72		470	0.1447	71.67		470	0.1477	71.16		470	0.1299	74.14		470	0.1532	70.28		470	0.1357	73.17		470	0.1219	75.53		470	0.1067	78.22		470	0.0995	79.52
471	0.059	87.29		471	0.0833	82.54		471	0.1455	71.53		471	0.1486	71.02		471	0.1305	74.04		471	0.1537	70.2		471	0.1359	73.13		471	0.1222	75.48		471	0.107	78.17		471	0.0998	79.47
472	0.0601	87.07		472	0.0843	82.35		472	0.1464	71.38		472	0.1494	70.9		472	0.1312	73.93		472	0.1542	70.11		472	0.1363	73.07		472	0.1225	75.43		472	0.1073	78.11		472	0.1	79.44
473	0.0612	86.85		473	0.0853	82.17		473	0.1473	71.24		473	0.1502	70.77		473	0.1318	73.82		473	0.1548	70.02		473	0.1366	73.01		473	0.1228	75.37		473	0.1075	78.08		473	0.1002	79.4
474	0.0623	86.63		474	0.0862	82		474	0.1481	71.11		474	0.1509	70.65		474	0.1324	73.72		474	0.1553	69.93		474	0.1371	72.93		474	0.1232	75.3		474	0.1077	78.04		474	0.1004	79.36
475	0.0634	86.42		475	0.0872	81.81		475	0.149	70.96		475	0.1516	70.53		475	0.133	73.61		475	0.156	69.82		475	0.1374	72.87		475	0.1234	75.26		475	0.1079	78.01		475	0.1006	79.33
476	0.0645	86.2		476	0.0883	81.6		476	0.1498	70.83		476	0.1524	70.41		476	0.1337	73.51		476	0.1564	69.75		476	0.1378	72.81		476	0.1237	75.21		476	0.1082	77.95		476	0.1009	79.27
477	0.0657	85.96		477	0.0893	81.42		477	0.1508	70.66		477	0.1531	70.29		477	0.1343	73.4		477	0.157	69.66		477	0.1382	72.75		477	0.124	75.17		477	0.1083	77.92		477	0.101	79.25
478	0.0668	85.75		478	0.0903	81.23		478	0.1517	70.52		478	0.1539	70.16		478	0.135	73.28		478	0.1576	69.57		478	0.1386	72.68		478	0.1243	75.11		478	0.1087	77.86		478	0.1012	79.21
479	0.0679	85.53		479	0.0913	81.04		479	0.1525	70.39		479	0.1547	70.04		479	0.1355	73.2		479	0.158	69.5		479	0.1389	72.62		479	0.1245	75.07		479	0.1088	77.83		479	0.1014	79.18
480	0.0691	85.3		480	0.0923	80.86		480	0.1534	70.24		480	0.1553	69.94		480	0.1361	73.1		480	0.1586	69.41		480	0.1393	72.57		480	0.1249	75.01		480	0.1091	77.79		480	0.1016	79.14
481	0.0701	85.09		481	0.0933	80.68		481	0.1542	70.11		481	0.156	69.82		481	0.1367	73		481	0.159	69.35		481	0.1394	72.54		481	0.125	74.99		481	0.1093	77.75		481	0.1017	79.12
482	0.0712	84.88		482	0.0942	80.5		482	0.1552	69.96		482	0.1568	69.7		482	0.1374	72.88		482	0.1596	69.24		482	0.1398	72.47		482	0.1253	74.93		482	0.1095	77.72		482	0.1019	79.08
483	0.0725	84.63		483	0.0954	80.27		483	0.1562	69.79		483	0.1576	69.57		483	0.1381	72.77		483	0.1602	69.15		483	0.1404	72.38		483	0.1257	74.86		483	0.1099	77.64		483	0.1023	79.01
484	0.0737	84.4		484	0.0964	80.09		484	0.157	69.66		484	0.1583	69.45		484	0.1386	72.67		484	0.1607	69.08		484	0.1407	72.33		484	0.1261	74.81		484	0.11	77.62		484	0.1025	78.98
485	0.0748	84.18		485	0.0975	79.89		485	0.1579	69.51		485	0.1591	69.33		485	0.1393	72.56		485	0.1613	68.98		485	0.141	72.27		485	0.1264	74.75		485	0.1103	77.57		485	0.1028	78.93
486	0.0758	83.98		486	0.0984	79.72		486	0.1587	69.39		486	0.1598	69.21		486	0.1398	72.48		486	0.1616	68.93		486	0.1413	72.23		486	0.1264	74.74		486	0.1105	77.54		486	0.1029	78.91
487	0.0769	83.77		487	0.0994	79.55		487	0.1596	69.25		487	0.1605	69.1		487	0.1404	72.38		487	0.162	68.86		487	0.1416	72.17		487	0.1268	74.67		487	0.1107	77.5		487	0.103	78.89
488	0.0781	83.55		488	0.1004	79.37		488	0.1605	69.1		488	0.1612	68.99		488	0.141	72.28		488	0.1625	68.78		488	0.1419	72.12		488	0.1271	74.63		488	0.111	77.45		488	0.1033	78.83
489	0.0792	83.33		489	0.1014	79.17		489	0.1614	68.96		489	0.162	68.87		489	0.1417	72.17		489	0.1631	68.7		489	0.1424	72.05		489	0.1275	74.57		489	0.1112	77.41		489	0.1036	78.78
490	0.0802	83.14		490	0.1023	79.02		490	0.1622	68.83		490	0.1626	68.77		490	0.1422	72.07		490	0.1636	68.61		490	0.1427	72		490	0.1277	74.52		490	0.1114	77.37		490	0.1038	78.74
491	0.081	82.99		491	0.1029	78.9		491	0.1629	68.73		491	0.1633	68.67		491	0.1427	72		491	0.1639	68.57		491	0.1429	71.96		491	0.1279	74.49		491	0.1116	77.33		491	0.104	78.71
492	0.0818	82.83		492	0.1037	78.76		492	0.1636	68.62		492	0.1638	68.59		492	0.1432	71.92		492	0.1644	68.49		492	0.1432	71.92		492	0.1281	74.46		492	0.1119	77.29		492	0.1041	78.68
493	0.0827	82.65		493	0.1045	78.61		493	0.1643	68.5		493	0.1645	68.48		493	0.1438	71.81		493	0.165	68.4		493	0.1436	71.84		493	0.1285	74.39		493	0.1122	77.24		493	0.1044	78.63
494	0.0835	82.5		494	0.1053	78.48		494	0.1651	68.38		494	0.1651	68.38		494	0.1444	71.72		494	0.1655	68.32		494	0.144	71.79		494	0.1288	74.33		494	0.1125	77.18		494	0.1047	78.58
495	0.0842	82.38		495	0.1059	78.36		495	0.166	68.24		495	0.1656	68.3		495	0.1448	71.64		495	0.166	68.24		495	0.1444	71.72		495	0.1292	74.27		495	0.1128	77.13		495	0.105	78.53
496	0.0848	82.26		496	0.1064	78.27		496	0.1662	68.2		496	0.1662	68.21		496	0.1454	71.55		496	0.1664	68.18		496	0.1447	71.67		496	0.1295	74.22		496	0.113	77.09		496	0.1052	78.49
497	0.0854	82.15		497	0.1069	78.19		497	0.1668	68.11		497	0.1666	68.15		497	0.1458	71.48		497	0.1668	68.11		497	0.1449	71.62		497	0.1297	74.17		497	0.1132	77.06		497	0.1054	78.46
498	0.0859	82.05		498	0.1074	78.08		498	0.1672	68.04		498	0.1671	68.06		498	0.1464	71.38		498	0.1673	68.03		498	0.1453	71.57		498	0.1301	74.12		498	0.1135	77		498	0.1057	78.4
499	0.0865	81.94		499	0.1079	78		499	0.1678	67.96		499	0.1677	67.96		499	0.1469	71.3		499	0.1678	67.96		499	0.1458	71.48		499	0.1304	74.06		499	0.1138	76.95		499	0.1059	78.35
500	0.0869	81.86		500	0.1083	77.93		500	0.1682	67.88		500	0.1682	67.89		500	0.1475	71.21		500	0.1683	67.88		500	0.1461	71.44		500	0.1309	73.98		500	0.1142	76.88		500	0.1063	78.29
501	0.0874	81.77		501	0.1087	77.86		501	0.1687	67.81		501	0.1687	67.82		501	0.1481	71.11		501	0.1686	67.82		501	0.1466	71.36		501	0.1312	73.93		501	0.1146	76.81		501	0.1066	78.24
502	0.0877	81.71		502	0.1089	77.82		502	0.1691	67.75		502	0.1691	67.75		502	0.1485	71.04		502	0.169	67.76		502	0.1469	71.3		502	0.1315	73.87		502	0.1147	76.79		502	0.1068	78.21
503	0.0881	81.63		503	0.1091	77.78		503	0.1694	67.7		503	0.1695	67.69		503	0.149	70.96		503	0.1694	67.7		503	0.1472	71.25		503	0.1318	73.82		503	0.115	76.74		503	0.107	78.16
504	0.0885	81.56		504	0.1095	77.71		504	0.1699	67.63		504	0.1701	67.59		504	0.1496	70.86		504	0.1701	67.6		504	0.1478	71.16		504	0.1323	73.74		504	0.1154	76.66		504	0.1074	78.09
505	0.0889	81.49		505	0.1098	77.66		505	0.1704	67.55		505	0.1708	67.49		505	0.1503	70.74		505	0.1709	67.47		505	0.1483	71.08		505	0.1328	73.65		505	0.1159	76.58		505	0.1078	78.02
506	0.0893	81.42		506	0.1101	77.6		506	0.171	67.46		506	0.1715	67.38		506	0.1511	70.61		506	0.1715	67.38		506	0.1489	70.97		506	0.1333	73.57		506	0.1163	76.5		506	0.1082	77.94
507	0.0896	81.36		507	0.1105	77.54		507	0.1714	67.39		507	0.1722	67.27		507	0.1517	70.51		507	0.1722	67.27		507	0.1494	70.89		507	0.1339	73.47		507	0.1168	76.42		507	0.1086	77.88
508	0.0899	81.3		508	0.1107	77.5		508	0.1718	67.33		508	0.1727	67.19		508	0.1523	70.42		508	0.1727	67.18		508	0.1499	70.81		508	0.1343	73.4		508	0.1172	76.35		508	0.1089	77.82
509	0.0903	81.23		509	0.111	77.44		509	0.1724	67.24		509	0.1734	67.08		509	0.1531	70.3		509	0.1734	67.08		509	0.1505	70.72		509	0.1348	73.32		509	0.1176	76.28		509	0.1093	77.75
510	0.0907	81.15		510	0.1113	77.39		510	0.1729	67.16		510	0.1741	66.97		510	0.1539	70.17		510	0.1743	66.95		510	0.151	70.63		510	0.1353	73.23		510	0.1181	76.19		510	0.1098	77.65
511	0.091	81.09		511	0.1116	77.34		511	0.1734	67.08		511	0.1747	66.88		511	0.1545	70.07		511	0.1747	66.87		511	0.1515	70.55		511	0.1358	73.15		511	0.1184	76.14		511	0.1101	77.61
512	0.0918	80.95		512	0.1123	77.21		512	0.1743	66.94		512	0.1758	66.71		512	0.1556	69.88		512	0.1758	66.71		512	0.1523	70.43		512	0.1366	73.01		512	0.1191	76.01		512	0.1107	77.49
513	0.0923	80.85		513	0.1128	77.13		513	0.1751	66.81		513	0.1767	66.58		513	0.1566	69.72		513	0.1766	66.59		513	0.1529	70.32		513	0.1373	72.9		513	0.1198	75.89		513	0.1112	77.41
514	0.0929	80.74		514	0.1134	77.03		514	0.1759	66.7		514	0.1776	66.44		514	0.1575	69.58		514	0.1775	66.45		514	0.1536	70.21		514	0.138	72.78		514	0.1201	75.85		514	0.1116	77.33
515	0.0937	80.59		515	0.1139	76.92		515	0.1767	66.57		515	0.1785	66.29		515	0.1584	69.43		515	0.1784	66.32		515	0.1545	70.07		515	0.1386	72.68		515	0.1208	75.73		515	0.1122	77.24
516	0.0946	80.43		516	0.1148	76.77		516	0.1777	66.42		516	0.1796	66.12		516	0.1596	69.25		516	0.1795	66.15		516	0.1552	69.96		516	0.1394	72.55		516	0.1214	75.62		516	0.1127	77.13
517	0.0954	80.28		517	0.1155	76.65		517	0.1787	66.27		517	0.1807	65.96		517	0.1607	69.07		517	0.1805	65.99		517	0.156	69.82		517	0.1401	72.43		517	0.122	75.5		517	0.1133	77.04
518	0.0964	80.1		518	0.1165	76.47		518	0.1799	66.09		518	0.1821	65.75		518	0.1619	68.88		518	0.1816	65.82		518	0.157	69.66		518	0.1409	72.3		518	0.1227	75.39		518	0.1139	76.94
519	0.0975	79.89		519	0.1175	76.3		519	0.1811	65.91		519	0.1833	65.57		519	0.1631	68.69		519	0.1829	65.63		519	0.1579	69.51		519	0.1417	72.16		519	0.1234	75.27		519	0.1144	76.84
520	0.0986	79.69		520	0.1183	76.16		520	0.1823	65.73		520	0.1845	65.38		520	0.1642	68.51		520	0.184	65.47		520	0.1587	69.39		520	0.1424	72.05		520	0.1239	75.17		520	0.115	76.73
521	0.0998	79.47		521	0.1195	75.95		521	0.1836	65.53		521	0.1859	65.18		521	0.1655	68.31		521	0.1851	65.3		521	0.1596	69.25		521	0.1433	71.9		521	0.1246	75.06		521	0.1156	76.64
522	0.1011	79.23		522	0.1206	75.76		522	0.1849	65.33		522	0.1874	64.96		522	0.1668	68.11		522	0.1863	65.12		522	0.1605	69.11		522	0.144	71.78		522	0.1252	74.95		522	0.1162	76.53
523	0.1027	78.94		523	0.1219	75.52		523	0.1864	65.1		523	0.1889	64.73		523	0.1682	67.88		523	0.1876	64.92		523	0.1617	68.91		523	0.1449	71.62		523	0.126	74.81		523	0.1167	76.43
524	0.1044	78.64		524	0.1236	75.23		524	0.1882	64.84		524	0.1907	64.46		524	0.1699	67.62		524	0.1891	64.7		524	0.1629	68.73		524	0.146	71.45		524	0.1269	74.66		524	0.1176	76.28
525	0.1063	78.28		525	0.1253	74.95		525	0.1901	64.55		525	0.1926	64.18		525	0.1717	67.35		525	0.1907	64.46		525	0.1641	68.53		525	0.1471	71.26		525	0.1279	74.49		525	0.1184	76.13
526	0.1084	77.9		526	0.1272	74.62		526	0.1922	64.24		526	0.1946	63.89		526	0.1734	67.07		526	0.1924	64.21		526	0.1654	68.33		526	0.1482	71.09		526	0.1286	74.36		526	0.1192	76
527	0.1107	77.51		527	0.1291	74.28		527	0.1943	63.93		527	0.1966	63.59		527	0.1754	66.78		527	0.194	63.98		527	0.1666	68.14		527	0.1492	70.93		527	0.1296	74.2		527	0.1199	75.88
528	0.1129	77.1		528	0.1311	73.94		528	0.1964	63.61		528	0.1988	63.27		528	0.1773	66.49		528	0.1957	63.72		528	0.168	67.93		528	0.1503	70.75		528	0.1305	74.04		528	0.1206	75.75
529	0.1153	76.68		529	0.1337	73.51		529	0.1987	63.28		529	0.2009	62.96		529	0.1793	66.17		529	0.1974	63.47		529	0.1693	67.72		529	0.1515	70.56		529	0.1314	73.89		529	0.1215	75.6
530	0.1181	76.2		530	0.1359	73.13		530	0.2013	62.91		530	0.2035	62.59		530	0.1816	65.83		530	0.1995	63.17		530	0.171	67.45		530	0.1528	70.34		530	0.1325	73.71		530	0.1225	75.41
531	0.121	75.69		531	0.1385	72.69		531	0.2039	62.53		531	0.206	62.22		531	0.1838	65.5		531	0.2014	62.9		531	0.1725	67.22		531	0.1541	70.13		531	0.1336	73.52		531	0.1235	75.26
532	0.1238	75.2		532	0.1411	72.26		532	0.2065	62.16		532	0.2084	61.88		532	0.186	65.16		532	0.2033	62.61		532	0.174	66.99		532	0.1554	69.92		532	0.1345	73.36		532	0.1244	75.1
533	0.1267	74.7		533	0.1437	71.83		533	0.2091	61.79		533	0.2109	61.53		533	0.1881	64.84		533	0.2054	62.32		533	0.1755	66.76		533	0.1565	69.74		533	0.1355	73.19		533	0.1252	74.96
534	0.13	74.13		534	0.1466	71.35		534	0.2122	61.34		534	0.2139	61.11		534	0.1906	64.48		534	0.2076	62.01		534	0.1771	66.51		534	0.1579	69.52		534	0.1366	73.01		534	0.1262	74.79
535	0.1334	73.55		535	0.1496	70.86		535	0.2153	60.91		535	0.2168	60.7		535	0.193	64.12		535	0.2096	61.71		535	0.1787	66.27		535	0.1593	69.3		535	0.1378	72.82		535	0.127	74.64
536	0.1372	72.91		536	0.153	70.31		536	0.2186	60.45		536	0.2198	60.29		536	0.1957	63.73		536	0.212	61.37		536	0.1804	66.01		536	0.1607	69.08		536	0.1389	72.63		536	0.1281	74.45
537	0.1412	72.24		537	0.1567	69.71		537	0.2223	59.94		537	0.223	59.83		537	0.1985	63.31		537	0.2145	61.02		537	0.1824	65.7		537	0.1623	68.82		537	0.1402	72.41		537	0.1293	74.25
538	0.1453	71.57		538	0.1603	69.14		538	0.2259	59.44		538	0.2264	59.38		538	0.2013	62.91		538	0.2169	60.68		538	0.1842	65.43		538	0.1638	68.57		538	0.1413	72.23		538	0.1304	74.07
539	0.1493	70.92		539	0.164	68.55		539	0.2296	58.94		539	0.2296	58.94		539	0.204	62.52		539	0.2194	60.34		539	0.1861	65.15		539	0.1654	68.32		539	0.1426	72.02		539	0.1314	73.9
540	0.1534	70.24		540	0.1678	67.95		540	0.2333	58.43		540	0.233	58.48		540	0.207	62.09		540	0.2219	60		540	0.1878	64.9		540	0.1668	68.1		540	0.1439	71.8		540	0.1323	73.75
541	0.1579	69.52		541	0.172	67.3		541	0.2376	57.86		541	0.2365	58.01		541	0.2101	61.65		541	0.2245	59.63		541	0.1898	64.6		541	0.1685	67.85		541	0.1451	71.6		541	0.1334	73.56
542	0.1629	68.72		542	0.1765	66.61		542	0.242	57.28		542	0.2405	57.48		542	0.2133	61.2		542	0.2274	59.23		542	0.1921	64.26		542	0.1703	67.56		542	0.1466	71.35		542	0.1348	73.32
543	0.1678	67.95		543	0.1809	65.94		543	0.2462	56.73		543	0.2444	56.97		543	0.2166	60.73		543	0.2302	58.86		543	0.1942	63.95		543	0.1721	67.29		543	0.1479	71.13		543	0.136	73.12
544	0.173	67.14		544	0.1857	65.21		544	0.2508	56.13		544	0.2484	56.45		544	0.2201	60.24		544	0.2332	58.46		544	0.1965	63.61		544	0.1739	67		544	0.1495	70.88		544	0.1373	72.89
545	0.1786	66.28		545	0.1907	64.46		545	0.2557	55.51		545	0.2526	55.9		545	0.2238	59.73		545	0.2363	58.04		545	0.1986	63.29		545	0.1758	66.71		545	0.1509	70.65		545	0.1386	72.68
546	0.1844	65.4		546	0.1962	63.65		546	0.2608	54.86		546	0.2571	55.32		546	0.2274	59.24		546	0.2393	57.64		546	0.2011	62.93		546	0.1778	66.41		546	0.1524	70.41		546	0.1399	72.46
547	0.1905	64.49		547	0.2016	62.86		547	0.2658	54.22		547	0.2616	54.75		547	0.2312	58.73		547	0.2425	57.22		547	0.2035	62.59		547	0.1796	66.12		547	0.1538	70.18		547	0.1411	72.26
548	0.1969	63.54		548	0.2074	62.02		548	0.2714	53.53		548	0.2664	54.15		548	0.2353	58.17		548	0.246	56.76		548	0.2061	62.21		548	0.1818	65.8		548	0.1555	69.91		548	0.1425	72.03
549	0.2037	62.57		549	0.2136	61.16		549	0.2772	52.82		549	0.2715	53.52		549	0.2396	57.6		549	0.2496	56.28		549	0.2089	61.82		549	0.184	65.46		549	0.1572	69.62		549	0.144	71.78
550	0.2104	61.6		550	0.2197	60.3		550	0.2829	52.13		550	0.2765	52.9		550	0.2437	57.06		550	0.253	55.84		550	0.2116	61.43		550	0.1861	65.14		550	0.1589	69.36		550	0.1454	71.55
551	0.2171	60.66		551	0.2258	59.46		551	0.2887	51.43		551	0.2815	52.3		551	0.2478	56.52		551	0.2566	55.38		551	0.2142	61.06		551	0.1883	64.82		551	0.1606	69.09		551	0.1469	71.31
552	0.224	59.7		552	0.2322	58.59		552	0.2947	50.74		552	0.2866	51.68		552	0.2522	55.95		552	0.2603	54.92		552	0.2169	60.69		552	0.1905	64.5		552	0.1624	68.81		552	0.1483	71.08
553	0.231	58.75		553	0.2386	57.72		553	0.3006	50.05		553	0.2918	51.08		553	0.2565	55.4		553	0.2639	54.46		553	0.2197	60.3		553	0.1926	64.19		553	0.164	68.55		553	0.1496	70.87
554	0.2381	57.8		554	0.245	56.89		554	0.3066	49.36		554	0.297	50.47		554	0.2608	54.85		554	0.2677	53.99		554	0.2224	59.92		554	0.1948	63.86		554	0.1657	68.29		554	0.1509	70.64
555	0.245	56.88		555	0.2513	56.06		555	0.3126	48.68		555	0.3021	49.88		555	0.2652	54.3		555	0.2715	53.52		555	0.2253	59.53		555	0.197	63.53		555	0.1675	68		555	0.1524	70.4
556	0.252	55.98		556	0.2577	55.25		556	0.3187	48.01		556	0.3073	49.28		556	0.2696	53.75		556	0.2753	53.05		556	0.2281	59.14		556	0.1993	63.2		556	0.1692	67.74		556	0.1539	70.17
557	0.2592	55.05		557	0.2643	54.41		557	0.325	47.31		557	0.3129	48.65		557	0.2743	53.18		557	0.2792	52.57		557	0.2309	58.76		557	0.2016	62.87		557	0.171	67.45		557	0.1553	69.94
558	0.2665	54.13		558	0.2711	53.56		558	0.3315	46.61		558	0.3185	48.03		558	0.279	52.6		558	0.2833	52.08		558	0.234	58.35		558	0.2038	62.55		558	0.1728	67.17		558	0.1568	69.7
559	0.2737	53.25		559	0.2778	52.75		559	0.3379	45.93		559	0.324	47.43		559	0.2837	52.04		559	0.2872	51.62		559	0.2369	57.96		559	0.2061	62.22		559	0.1746	66.9		559	0.1583	69.46
560	0.2808	52.38		560	0.2844	51.95		560	0.3442	45.27		560	0.3295	46.82		560	0.2884	51.47		560	0.2912	51.15		560	0.2398	57.57		560	0.2084	61.89		560	0.1763	66.63		560	0.1596	69.24
561	0.2886	51.45		561	0.2916	51.1		561	0.351	44.57		561	0.3355	46.19		561	0.2934	50.88		561	0.2954	50.66		561	0.2429	57.16		561	0.2108	61.54		561	0.178	66.37		561	0.1611	69
562	0.2966	50.51		562	0.2988	50.26		562	0.3579	43.87		562	0.3417	45.53		562	0.2986	50.28		562	0.2997	50.15		562	0.246	56.75		562	0.2133	61.2		562	0.18	66.08		562	0.1627	68.75
563	0.3044	49.61		563	0.306	49.44		563	0.3648	43.17		563	0.3477	44.9		563	0.3038	49.69		563	0.3041	49.65		563	0.2494	56.32		563	0.2157	60.86		563	0.1818	65.8		563	0.1641	68.53
564	0.3126	48.69		564	0.3134	48.59		564	0.3721	42.45		564	0.3542	44.23		564	0.3091	49.08		564	0.3087	49.13		564	0.2525	55.91		564	0.2182	60.5		564	0.1838	65.5		564	0.1656	68.29
565	0.3218	47.67		565	0.3217	47.68		565	0.3802	41.67		565	0.3615	43.51		565	0.3149	48.43		565	0.3136	48.58		565	0.2562	55.43		565	0.221	60.12		565	0.1858	65.2		565	0.1674	68.02
566	0.331	46.67		566	0.33	46.77		566	0.3884	40.89		566	0.3688	42.77		566	0.3211	47.74		566	0.3187	48		566	0.2599	54.96		566	0.2238	59.73		566	0.1879	64.87		566	0.1692	67.73
567	0.3397	45.74		567	0.3381	45.91		567	0.3962	40.16		567	0.3756	42.11		567	0.3269	47.11		567	0.3236	47.46		567	0.2634	54.52		567	0.2264	59.37		567	0.1899	64.57		567	0.1708	67.49
568	0.3485	44.82		568	0.3464	45.04		568	0.4043	39.42		568	0.3827	41.42		568	0.3328	46.48		568	0.3286	46.92		568	0.2669	54.08		568	0.2291	59		568	0.192	64.28		568	0.1723	67.25
569	0.358	43.86		569	0.355	44.16		569	0.4128	38.65		569	0.3901	40.73		569	0.3388	45.84		569	0.3337	46.38		569	0.2705	53.64		569	0.2319	58.63		569	0.1939	63.98		569	0.174	66.98
570	0.3678	42.87		570	0.364	43.25		570	0.4214	37.89		570	0.3978	40.02		570	0.3451	45.17		570	0.3389	45.83		570	0.2742	53.18		570	0.2345	58.28		570	0.196	63.68		570	0.1755	66.76
571	0.378	41.88		571	0.3734	42.32		571	0.4306	37.1		571	0.4056	39.3		571	0.3517	44.5		571	0.3443	45.26		571	0.2779	52.73		571	0.2373	57.9		571	0.1981	63.37		571	0.1771	66.51
572	0.3888	40.85		572	0.3833	41.37		572	0.4402	36.29		572	0.4138	38.56		572	0.3583	43.82		572	0.3498	44.69		572	0.2816	52.28		572	0.2401	57.53		572	0.2002	63.07		572	0.1788	66.25
573	0.3999	39.82		573	0.3935	40.41		573	0.4499	35.49		573	0.4222	37.83		573	0.365	43.16		573	0.3552	44.14		573	0.2854	51.83		573	0.2429	57.16		573	0.2023	62.76		573	0.1804	66
574	0.4113	38.78		574	0.4039	39.46		574	0.4597	34.7		574	0.4307	37.1		574	0.3717	42.49		574	0.3607	43.58		574	0.2892	51.39		574	0.2456	56.8		574	0.2044	62.47		574	0.1821	65.75
575	0.4232	37.74		575	0.4148	38.48		575	0.4701	33.87		575	0.4393	36.36		575	0.3786	41.82		575	0.3661	43.04		575	0.293	50.94		575	0.2482	56.46		575	0.2063	62.19		575	0.1836	65.53
576	0.4357	36.67		576	0.4264	37.46		576	0.4809	33.05		576	0.4483	35.62		576	0.3856	41.15		576	0.3716	42.5		576	0.2965	50.53		576	0.251	56.11		576	0.2082	61.92		576	0.185	65.31
577	0.4489	35.57		577	0.4383	36.45		577	0.4916	32.24		577	0.4573	34.89		577	0.3926	40.5		577	0.3771	41.96		577	0.3002	50.1		577	0.2536	55.77		577	0.21	61.65		577	0.1864	65.1
578	0.4621	34.51		578	0.4502	35.46		578	0.5027	31.42		578	0.4665	34.16		578	0.3996	39.85		578	0.3827	41.43		578	0.3039	49.67		578	0.2562	55.44		578	0.212	61.37		578	0.1879	64.88
579	0.4755	33.46		579	0.4627	34.46		579	0.5141	30.61		579	0.4756	33.45		579	0.4068	39.19		579	0.3883	40.9		579	0.3076	49.25		579	0.2589	55.09		579	0.214	61.09		579	0.1894	64.66
580	0.4897	32.39		580	0.4758	33.43		580	0.5258	29.8		580	0.4851	32.73		580	0.414	38.55		580	0.3939	40.38		580	0.3113	48.83		580	0.2615	54.76		580	0.2159	60.82		580	0.1908	64.44
581	0.5049	31.27		581	0.4894	32.4		581	0.5384	28.95		581	0.4948	32		581	0.4213	37.91		581	0.3996	39.84		581	0.315	48.41		581	0.2642	54.42		581	0.2179	60.55		581	0.1924	64.21
582	0.5208	30.15		582	0.5034	31.38		582	0.5508	28.13		582	0.505	31.26		582	0.4287	37.27		582	0.4055	39.31		582	0.3188	47.99		582	0.2668	54.1		582	0.2198	60.28		582	0.1937	64.01
583	0.537	29.04		583	0.5184	30.31		583	0.5642	27.27		583	0.5151	30.54		583	0.4363	36.62		583	0.4112	38.8		583	0.3227	47.57		583	0.2694	53.77		583	0.2217	60.02		583	0.1952	63.79
584	0.5539	27.93		584	0.5338	29.26		584	0.5777	26.44		584	0.5256	29.82		584	0.4438	35.99		584	0.417	38.28		584	0.3263	47.17		584	0.2721	53.45		584	0.2235	59.77		584	0.1966	63.58
585	0.5668	27.11		585	0.5454	28.48		585	0.5879	25.83		585	0.5333	29.29		585	0.4494	35.53		585	0.4213	37.91		585	0.329	46.88		585	0.2739	53.22		585	0.2249	59.58		585	0.1977	63.43
586	0.5936	25.49		586	0.57	26.91		586	0.6092	24.59		586	0.549	28.25		586	0.4614	34.56		586	0.4302	37.14		586	0.3346	46.28		586	0.2774	52.8		586	0.228	59.16		586	0.1991	63.23
587	0.6143	24.31		587	0.5889	25.77		587	0.6254	23.69		587	0.561	27.48		587	0.47	33.89		587	0.4369	36.57		587	0.3389	45.82		587	0.2805	52.42		587	0.2302	58.85		587	0.2008	62.98
588	0.6346	23.19		588	0.6076	24.68		588	0.6413	22.84		588	0.5727	26.75		588	0.4783	33.25		588	0.443	36.06		588	0.3428	45.42		588	0.2832	52.09		588	0.2324	58.56		588	0.2023	62.76
589	0.656	22.08		589	0.6268	23.62		589	0.6574	22.01		589	0.5843	26.04		589	0.4863	32.64		589	0.4492	35.55		589	0.3466	45.02		589	0.2859	51.77		589	0.2344	58.29		589	0.2039	62.52
590	0.6776	21.01		590	0.6465	22.57		590	0.6739	21.19		590	0.596	25.35		590	0.4947	32.01		590	0.4555	35.04		590	0.3506	44.61		590	0.2887	51.44		590	0.2364	58.02		590	0.2055	62.3
591	0.6994	19.98		591	0.6664	21.56		591	0.6901	20.41		591	0.6076	24.68		591	0.5029	31.41		591	0.4613	34.57		591	0.3544	44.22		591	0.2914	51.12		591	0.2384	57.75		591	0.207	62.09
592	0.7213	19		592	0.6868	20.57		592	0.7063	19.66		592	0.6193	24.03		592	0.5108	30.85		592	0.4671	34.11		592	0.358	43.85		592	0.2941	50.81		592	0.2404	57.5		592	0.2085	61.87
593	0.7441	18.03		593	0.7075	19.61		593	0.7228	18.93		593	0.6308	23.4		593	0.5185	30.3		593	0.4729	33.66		593	0.3617	43.48		593	0.2967	50.51		593	0.2423	57.24		593	0.2099	61.68
594	0.7672	17.09		594	0.7285	18.68		594	0.7397	18.21		594	0.6422	22.79		594	0.5266	29.75		594	0.4789	33.19		594	0.3657	43.08		594	0.2994	50.19		594	0.2444	56.96		594	0.2114	61.47
595	0.7907	16.19		595	0.7496	17.8		595	0.7563	17.53		595	0.6538	22.19		595	0.5343	29.22		595	0.4851	32.73		595	0.3695	42.7		595	0.3021	49.87		595	0.2465	56.69		595	0.213	61.23
596	0.8137	15.36		596	0.7708	16.95		596	0.7729	16.87		596	0.6651	21.62		596	0.5417	28.72		596	0.4906	32.32		596	0.3732	42.34		596	0.3047	49.58		596	0.2486	56.42		596	0.2145	61.03
597	0.8313	14.75		597	0.7861	16.36		597	0.785	16.4		597	0.6731	21.23		597	0.5472	28.37		597	0.4949	32		597	0.3759	42.09		597	0.3066	49.36		597	0.25	56.24		597	0.2157	60.86
598	0.8618	13.75		598	0.8136	15.36		598	0.806	15.63		598	0.687	20.56		598	0.5568	27.74		598	0.5021	31.47		598	0.3805	41.64		598	0.3097	49.01		598	0.2526	55.9		598	0.2174	60.62
599	0.8843	13.05		599	0.8344	14.64		599	0.8218	15.07		599	0.6973	20.08		599	0.5637	27.31		599	0.5074	31.09		599	0.3839	41.31		599	0.3121	48.74		599	0.2545	55.66		599	0.2188	60.43
600	0.9062	12.41		600	0.8543	13.99		600	0.8367	14.56		600	0.7071	19.63		600	0.5701	26.91		600	0.5123	30.74		600	0.3871	41.01		600	0.3145	48.47		600	0.2562	55.44		600	0.22	60.25
601	0.9278	11.81		601	0.8736	13.38		601	0.8514	14.08		601	0.7164	19.21		601	0.5767	26.51		601	0.5173	30.39		601	0.3904	40.7		601	0.3169	48.21		601	0.258	55.21		601	0.2214	60.06
602	0.9487	11.25		602	0.893	12.79		602	0.8655	13.63		602	0.7259	18.8		602	0.5833	26.11		602	0.5225	30.03		602	0.3939	40.38		602	0.3193	47.94		602	0.2598	54.99		602	0.2227	59.88
603	0.968	10.76		603	0.9113	12.26		603	0.8789	13.21		603	0.7346	18.42		603	0.5894	25.74		603	0.5274	29.69		603	0.3969	40.09		603	0.3216	47.69		603	0.2616	54.76		603	0.224	59.7
604	0.9868	10.31		604	0.9285	11.79		604	0.8918	12.83		604	0.7429	18.07		604	0.5951	25.4		604	0.532	29.37		604	0.4	39.81		604	0.3238	47.44		604	0.2632	54.55		604	0.2252	59.54
605	1.0048	9.89		605	0.9446	11.36		605	0.9037	12.48		605	0.7511	17.74		605	0.6009	25.07		605	0.5366	29.07		605	0.4031	39.53		605	0.326	47.21		605	0.2649	54.33		605	0.2265	59.36
606	1.0211	9.52		606	0.9599	10.97		606	0.915	12.16		606	0.7586	17.43		606	0.6067	24.73		606	0.5412	28.76		606	0.4062	39.25		606	0.3282	46.96		606	0.2665	54.13		606	0.2276	59.21
607	1.0353	9.22		607	0.9738	10.62		607	0.9256	11.87		607	0.7658	17.15		607	0.6124	24.41		607	0.5457	28.47		607	0.4092	38.97		607	0.3304	46.73		607	0.2681	53.94		607	0.2288	59.05
608	1.048	8.95		608	0.9854	10.34		608	0.9342	11.64		608	0.7721	16.9		608	0.6172	24.14		608	0.5498	28.19		608	0.412	38.72		608	0.3324	46.51		608	0.2695	53.77		608	0.2297	58.93
609	1.0587	8.74		609	0.9953	10.11		609	0.9418	11.43		609	0.778	16.67		609	0.6221	23.87		609	0.5539	27.93		609	0.4148	38.48		609	0.3343	46.31		609	0.2708	53.6		609	0.2306	58.81
610	1.0663	8.58		610	1.003	9.93		610	0.9483	11.27		610	0.7831	16.48		610	0.6264	23.64		610	0.5577	27.69		610	0.4173	38.26		610	0.336	46.13		610	0.272	53.46		610	0.2313	58.71
611	1.0727	8.46		611	1.0089	9.8		611	0.9534	11.13		611	0.7876	16.31		611	0.6304	23.42		611	0.5612	27.47		611	0.4197	38.05		611	0.3377	45.95		611	0.2732	53.31		611	0.2321	58.61
612	1.0772	8.37		612	1.0135	9.69		612	0.9579	11.02		612	0.7918	16.15		612	0.6343	23.21		612	0.5646	27.25		612	0.4221	37.84		612	0.3392	45.79		612	0.2742	53.19		612	0.2327	58.51
613	1.0799	8.32		613	1.0168	9.62		613	0.9613	10.93		613	0.7956	16.01		613	0.6378	23.02		613	0.5679	27.05		613	0.4243	37.65		613	0.3407	45.63		613	0.2752	53.06		613	0.2333	58.44
614	1.0817	8.29		614	1.0184	9.59		614	0.9641	10.86		614	0.7989	15.89		614	0.6414	22.83		614	0.5711	26.85		614	0.4264	37.47		614	0.342	45.49		614	0.2761	52.96		614	0.2338	58.37
615	1.0817	8.28		615	1.0191	9.57		615	0.966	10.81		615	0.8021	15.77		615	0.6448	22.66		615	0.5739	26.67		615	0.4283	37.3		615	0.3433	45.36		615	0.2767	52.88		615	0.2342	58.32
616	1.0813	8.29		616	1.0191	9.57		616	0.9678	10.77		616	0.8049	15.67		616	0.6479	22.49		616	0.5769	26.49		616	0.4302	37.14		616	0.3444	45.25		616	0.2775	52.79		616	0.2344	58.29
617	1.0799	8.32		617	1.0185	9.58		617	0.9689	10.74		617	0.8078	15.57		617	0.6511	22.33		617	0.5797	26.32		617	0.4319	36.99		617	0.3453	45.16		617	0.2779	52.73		617	0.2345	58.27
618	1.0779	8.36		618	1.0171	9.61		618	0.9701	10.71		618	0.8105	15.47		618	0.6541	22.18		618	0.5825	26.15		618	0.4333	36.87		618	0.3461	45.07		618	0.2783	52.69		618	0.2346	58.27
619	1.0759	8.4		619	1.0159	9.64		619	0.9711	10.69		619	0.8133	15.37		619	0.6572	22.02		619	0.5851	26		619	0.4348	36.74		619	0.3468	45		619	0.2785	52.66		619	0.2344	58.29
620	1.0739	8.44		620	1.0144	9.67		620	0.9723	10.66		620	0.8162	15.27		620	0.6604	21.86		620	0.5874	25.86		620	0.4361	36.63		620	0.3474	44.94		620	0.2786	52.65		620	0.2342	58.31
621	1.072	8.47		621	1.013	9.71		621	0.9737	10.62		621	0.8194	15.16		621	0.6635	21.7		621	0.5901	25.7		621	0.4374	36.52		621	0.3478	44.89		621	0.2787	52.64		621	0.234	58.34
622	1.0705	8.5		622	1.0123	9.72		622	0.9757	10.57		622	0.823	15.03		622	0.667	21.53		622	0.5927	25.55		622	0.4387	36.41		622	0.3482	44.85		622	0.2786	52.65		622	0.2337	58.39
623	1.0694	8.52		623	1.0118	9.73		623	0.978	10.52		623	0.8267	14.9		623	0.6704	21.36		623	0.5953	25.39		623	0.4399	36.32		623	0.3485	44.82		623	0.2785	52.67		623	0.2333	58.44
624	1.07	8.51		624	1.0125	9.72		624	0.9811	10.44		624	0.8308	14.76		624	0.6742	21.18		624	0.5979	25.24		624	0.441	36.23		624	0.3487	44.81		624	0.2781	52.71		624	0.2327	58.53
625	1.071	8.49		625	1.0142	9.68		625	0.9852	10.35		625	0.8357	14.6		625	0.6783	20.97		625	0.6007	25.08		625	0.442	36.14		625	0.3487	44.81		625	0.2777	52.76		625	0.232	58.61
626	1.0734	8.44		626	1.0168	9.62		626	0.99	10.23		626	0.8409	14.42		626	0.6823	20.78		626	0.6035	24.92		626	0.4429	36.07		626	0.3485	44.82		626	0.2771	52.83		626	0.2311	58.73
627	1.0771	8.37		627	1.0227	9.49		627	0.9956	10.1		627	0.8467	14.23		627	0.6864	20.59		627	0.6062	24.76		627	0.4436	36.01		627	0.3482	44.85		627	0.2764	52.91		627	0.2302	58.86
628	1.0822	8.28		628	1.0257	9.43		628	1.002	9.95		628	0.8529	14.03		628	0.6906	20.39		628	0.6088	24.62		628	0.4442	35.95		628	0.348	44.87		628	0.2757	53		628	0.2293	58.98
629	1.0892	8.14		629	1.0324	9.28		629	1.0095	9.78		629	0.8595	13.82		629	0.6952	20.18		629	0.6116	24.46		629	0.4449	35.9		629	0.3475	44.93		629	0.2749	53.11		629	0.2281	59.14
630	1.0978	7.98		630	1.0407	9.1		630	1.0184	9.58		630	0.8667	13.59		630	0.7	19.95		630	0.6144	24.3		630	0.4454	35.86		630	0.347	44.97		630	0.2739	53.22		630	0.227	59.3
631	1.1082	7.8		631	1.0508	8.9		631	1.0283	9.37		631	0.8744	13.35		631	0.7047	19.74		631	0.617	24.15		631	0.4459	35.82		631	0.3464	45.04		631	0.2729	53.35		631	0.2258	59.45
632	1.1202	7.58		632	1.0619	8.67		632	1.0392	9.14		632	0.8824	13.11		632	0.7094	19.52		632	0.6197	24.01		632	0.446	35.81		632	0.3455	45.14		632	0.2716	53.5		632	0.2245	59.64
633	1.1334	7.36		633	1.0745	8.42		633	1.0506	8.9		633	0.8906	12.86		633	0.7142	19.31		633	0.622	23.88		633	0.446	35.81		633	0.3445	45.24		633	0.2703	53.67		633	0.2231	59.83
634	1.1485	7.1		634	1.089	8.15		634	1.0633	8.64		634	0.8992	12.61		634	0.7188	19.11		634	0.6241	23.76		634	0.4458	35.83		634	0.3433	45.37		634	0.2687	53.86		634	0.2216	60.03
635	1.1649	6.84		635	1.1045	7.86		635	1.0764	8.39		635	0.9078	12.36		635	0.7232	18.91		635	0.626	23.66		635	0.4453	35.87		635	0.3418	45.52		635	0.2671	54.07		635	0.2199	60.27
636	1.183	6.56		636	1.1211	7.57		636	1.0906	8.12		636	0.9168	12.11		636	0.7275	18.73		636	0.6276	23.57		636	0.4445	35.94		636	0.3402	45.69		636	0.2652	54.3		636	0.2181	60.52
637	1.2022	6.28		637	1.1398	7.25		637	1.1056	7.84		637	0.9263	11.85		637	0.7318	18.54		637	0.629	23.5		637	0.4435	36.01		637	0.3383	45.89		637	0.2633	54.54		637	0.2162	60.78
638	1.2232	5.98		638	1.1593	6.93		638	1.1211	7.57		638	0.9353	11.61		638	0.7359	18.37		638	0.6302	23.43		638	0.4424	36.11		638	0.3363	46.1		638	0.2612	54.8		638	0.2143	61.06
639	1.2447	5.69		639	1.1797	6.61		639	1.1369	7.3		639	0.9448	11.35		639	0.74	18.2		639	0.6313	23.37		639	0.4411	36.22		639	0.3343	46.31		639	0.2591	55.07		639	0.2124	61.32
640	1.2674	5.4		640	1.201	6.29		640	1.1531	7.03		640	0.9542	11.11		640	0.7439	18.03		640	0.6322	23.32		640	0.4397	36.34		640	0.3321	46.55		640	0.257	55.34		640	0.2103	61.62
641	1.2916	5.11		641	1.2235	5.98		641	1.1702	6.76		641	0.9637	10.87		641	0.7475	17.89		641	0.6329	23.29		641	0.4381	36.47		641	0.3298	46.79		641	0.2547	55.63		641	0.2082	61.92
642	1.3153	4.84		642	1.2465	5.67		642	1.1879	6.49		642	0.9731	10.64		642	0.7511	17.74		642	0.6335	23.26		642	0.4364	36.61		642	0.3273	47.06		642	0.2524	55.93		642	0.206	62.22
643	1.3409	4.56		643	1.2698	5.37		643	1.2054	6.23		643	0.9828	10.4		643	0.7543	17.61		643	0.6338	23.24		643	0.4343	36.78		643	0.3249	47.33		643	0.2499	56.25		643	0.2039	62.53
644	1.3674	4.29		644	1.2942	5.08		644	1.2232	5.98		644	0.9922	10.18		644	0.7574	17.48		644	0.6337	23.24		644	0.4321	36.97		644	0.3222	47.62		644	0.2472	56.59		644	0.2014	62.89
645	1.3955	4.02		645	1.3208	4.78		645	1.242	5.73		645	1.0018	9.96		645	0.7604	17.36		645	0.6335	23.25		645	0.4297	37.18		645	0.3192	47.95		645	0.2444	56.96		645	0.199	63.24
646	1.4267	3.74		646	1.3495	4.47		646	1.263	5.46		646	1.0121	9.73		646	0.7631	17.25		646	0.6328	23.29		646	0.4267	37.44		646	0.3158	48.33		646	0.2412	57.38		646	0.1962	63.66
647	1.4551	3.51		647	1.3763	4.2		647	1.2822	5.22		647	1.0207	9.53		647	0.7654	17.16		647	0.6319	23.34		647	0.4239	37.68		647	0.3125	48.7		647	0.2382	57.78		647	0.1936	64.04
648	1.4819	3.3		648	1.4015	3.97		648	1.2993	5.02		648	1.0289	9.36		648	0.7669	17.11		648	0.6306	23.41		648	0.4209	37.94		648	0.3094	49.05		648	0.2353	58.17		648	0.1911	64.41
649	1.5089	3.1		649	1.4271	3.74		649	1.3166	4.82		649	1.0361	9.2		649	0.7679	17.07		649	0.6289	23.5		649	0.4178	38.22		649	0.3061	49.42		649	0.2324	58.56		649	0.1886	64.77
650	1.5358	2.91		650	1.4523	3.53		650	1.3331	4.64		650	1.0425	9.07		650	0.7681	17.06		650	0.6267	23.62		650	0.4144	38.51		650	0.3025	49.83		650	0.2293	58.98		650	0.186	65.16
651	1.5601	2.75		651	1.4759	3.34		651	1.3481	4.49		651	1.0477	8.96		651	0.7676	17.08		651	0.624	23.77		651	0.4107	38.84		651	0.299	50.23		651	0.2263	59.39		651	0.1835	65.54
652	1.5843	2.6		652	1.4988	3.17		652	1.3622	4.34		652	1.052	8.87		652	0.7664	17.12		652	0.6206	23.95		652	0.4067	39.21		652	0.2953	50.67		652	0.2231	59.82		652	0.1808	65.95
653	1.6083	2.46		653	1.5201	3.02		653	1.3749	4.22		653	1.0554	8.8		653	0.7641	17.21		653	0.6166	24.18		653	0.4023	39.6		653	0.2914	51.12		653	0.2198	60.28		653	0.178	66.37
654	1.6295	2.35		654	1.5416	2.87		654	1.3861	4.11		654	1.0572	8.77		654	0.7611	17.33		654	0.6119	24.44		654	0.3976	40.03		654	0.287	51.64		654	0.2164	60.75		654	0.1752	66.81
655	1.65	2.24		655	1.5623	2.74		655	1.3964	4.01		655	1.0579	8.75		655	0.757	17.5		655	0.6067	24.74		655	0.3926	40.5		655	0.2827	52.15		655	0.2129	61.24		655	0.1723	67.25
656	1.669	2.14		656	1.5798	2.63		656	1.4052	3.93		656	1.0575	8.76		656	0.7521	17.7		656	0.6009	25.07		656	0.3872	41		656	0.2783	52.69		656	0.2095	61.74		656	0.1694	67.7
657	1.6882	2.05		657	1.5975	2.53		657	1.4127	3.87		657	1.0559	8.79		657	0.7465	17.93		657	0.5944	25.44		657	0.3816	41.53		657	0.2737	53.25		657	0.2058	62.26		657	0.1663	68.19
658	1.7055	1.97		658	1.6132	2.44		658	1.419	3.81		658	1.0525	8.86		658	0.74	18.2		658	0.5874	25.86		658	0.3757	42.11		658	0.2688	53.86		658	0.202	62.8		658	0.1634	68.65
659	1.72	1.91		659	1.6266	2.36		659	1.4231	3.77		659	1.0485	8.94		659	0.7327	18.51		659	0.58	26.3		659	0.3696	42.7		659	0.264	54.45		659	0.1983	63.35		659	0.1604	69.12
660	1.7327	1.85		660	1.6399	2.29		660	1.426	3.75		660	1.043	9.06		660	0.7244	18.86		660	0.5717	26.81		660	0.3632	43.33		660	0.2591	55.06		660	0.1945	63.91		660	0.1573	69.61
661	1.7427	1.81		661	1.6492	2.24		661	1.427	3.74		661	1.036	9.2		661	0.7151	19.27		661	0.563	27.35		661	0.3564	44.02		661	0.2539	55.73		661	0.1905	64.5		661	0.1542	70.12
662	1.749	1.78		662	1.6556	2.21		662	1.425	3.76		662	1.0273	9.39		662	0.705	19.72		662	0.5537	27.95		662	0.3494	44.73		662	0.2484	56.44		662	0.1865	65.09		662	0.1509	70.64
663	1.7523	1.77		663	1.6595	2.19		663	1.4208	3.79		663	1.0174	9.61		663	0.6943	20.22		663	0.5439	28.58		663	0.3422	45.48		663	0.2432	57.12		663	0.1825	65.69		663	0.1477	71.16
664	1.7523	1.77		664	1.6589	2.19		664	1.4134	3.86		664	1.0063	9.86		664	0.6823	20.78		664	0.5335	29.28		664	0.3348	46.26		664	0.2379	57.83		664	0.1783	66.33		664	0.1446	71.68
665	1.7467	1.79		665	1.6537	2.22		665	1.4025	3.96		665	0.9918	10.19		665	0.6689	21.43		665	0.5219	30.06		665	0.3271	47.09		665	0.232	58.61		665	0.174	66.99		665	0.1413	72.22
666	1.7359	1.84		666	1.6444	2.27		666	1.3877	4.09		666	0.9752	10.59		666	0.6546	22.15		666	0.51	30.91		666	0.319	47.97		666	0.2263	59.39		666	0.1698	67.64		666	0.138	72.78
667	1.7193	1.91		667	1.6285	2.35		667	1.3683	4.28		667	0.9562	11.06		667	0.6387	22.98		667	0.4973	31.82		667	0.3107	48.9		667	0.2203	60.21		667	0.1655	68.32		667	0.1347	73.34
668	1.6942	2.02		668	1.6053	2.48		668	1.3446	4.52		668	0.9345	11.63		668	0.6213	23.92		668	0.4839	32.81		668	0.3021	49.88		668	0.2144	61.04		668	0.1612	68.99		668	0.1313	73.9
669	1.6641	2.17		669	1.5752	2.66		669	1.3158	4.83		669	0.9106	12.29		669	0.6034	24.92		669	0.4703	33.86		669	0.2936	50.86		669	0.2086	61.86		669	0.1571	69.65		669	0.1282	74.43
670	1.6268	2.36		670	1.5408	2.88		670	1.2843	5.2		670	0.8849	13.04		670	0.5847	26.02		670	0.4564	34.96		670	0.2852	51.86		670	0.2028	62.7		670	0.1531	70.28		670	0.1251	74.97
671	1.5827	2.61		671	1.4985	3.17		671	1.2474	5.66		671	0.8573	13.89		671	0.5654	27.2		671	0.4422	36.13		671	0.2765	52.9		671	0.1971	63.52		671	0.1491	70.95		671	0.122	75.5
672	1.5331	2.93		672	1.4522	3.53		672	1.2074	6.2		672	0.8275	14.88		672	0.545	28.51		672	0.4275	37.37		672	0.268	53.95		672	0.1915	64.35		672	0.1451	71.6		672	0.1191	76.01
673	1.4764	3.34		673	1.3979	4		673	1.1623	6.88		673	0.7956	16.01		673	0.5237	29.95		673	0.4122	38.7		673	0.2594	55.03		673	0.1858	65.19		673	0.1412	72.25		673	0.1162	76.53
674	1.4137	3.86		674	1.3402	4.57		674	1.1144	7.68		674	0.762	17.3		674	0.5018	31.49		674	0.3969	40.1		674	0.2507	56.14		674	0.1801	66.05		674	0.1373	72.9		674	0.1133	77.04
675	1.348	4.49		675	1.2806	5.24		675	1.0661	8.59		675	0.7282	18.7		675	0.4801	33.1		675	0.3817	41.53		675	0.242	57.28		675	0.1748	66.86		675	0.1336	73.52		675	0.1105	77.54
676	1.279	5.26		676	1.2173	6.06		676	1.0156	9.65		676	0.6943	20.22		676	0.4581	34.83		676	0.3663	43.02		676	0.2334	58.43		676	0.1697	67.65		676	0.1299	74.14		676	0.1078	78.01
677	1.2071	6.21		677	1.1494	7.09		677	0.9622	10.91		677	0.6587	21.95		677	0.4354	36.69		677	0.351	44.56		677	0.2251	59.55		677	0.1644	68.49		677	0.1264	74.76		677	0.1051	78.5
678	1.1355	7.32		678	1.0831	8.26		678	0.9104	12.29		678	0.6244	23.75		678	0.4139	38.55		678	0.3362	46.11		678	0.2172	60.64		678	0.1596	69.25		678	0.1231	75.31		678	0.1028	78.93
679	1.0658	8.59		679	1.018	9.59		679	0.8594	13.82		679	0.5914	25.62		679	0.3932	40.44		679	0.3219	47.66		679	0.2097	61.7		679	0.1549	70		679	0.1199	75.87		679	0.1005	79.35
680	0.9991	10.02		680	0.955	11.09		680	0.8104	15.47		680	0.5597	27.56		680	0.3734	42.33		680	0.3085	49.15		680	0.2026	62.72		680	0.1504	70.72		680	0.1168	76.41		680	0.0983	79.75
681	0.9272	11.83		681	0.888	12.94		681	0.7578	17.47		681	0.5259	29.79		681	0.3527	44.39		681	0.2944	50.77		681	0.1953	63.79		681	0.1459	71.46		681	0.1138	76.94		681	0.0961	80.16
682	0.8559	13.93		682	0.8224	15.05		682	0.707	19.63		682	0.4934	32.1		682	0.3328	46.47		682	0.2811	52.35		682	0.1883	64.82		682	0.1417	72.16		682	0.111	77.45		682	0.094	80.55
683	0.788	16.29		683	0.7594	17.4		683	0.6586	21.95		683	0.4626	34.47		683	0.3137	48.56		683	0.2683	53.91		683	0.1815	65.84		683	0.1376	72.84		683	0.1083	77.93		683	0.092	80.91
684	0.7231	18.92		684	0.6979	20.05		684	0.612	24.43		684	0.4328	36.92		684	0.2954	50.65		684	0.2563	55.42		684	0.1753	66.79		684	0.1338	73.48		684	0.1057	78.4		684	0.09	81.28
685	0.6577	21.99		685	0.6375	23.04		685	0.5656	27.19		685	0.403	39.54		685	0.2773	52.81		685	0.2444	56.96		685	0.169	67.76		685	0.13	74.13		685	0.1032	78.85		685	0.0882	81.63
686	0.5976	25.26		686	0.5814	26.22		686	0.5235	29.95		686	0.3759	42.08		686	0.2607	54.87		686	0.2334	58.43		686	0.1634	68.65		686	0.1265	74.73		686	0.1009	79.27		686	0.0865	81.94
687	0.545	28.51		687	0.5322	29.36		687	0.4862	32.64		687	0.3521	44.45		687	0.2461	56.74		687	0.2235	59.77		687	0.1583	69.45		687	0.1234	75.26		687	0.0988	79.65		687	0.0849	82.24
688	0.4968	31.85		688	0.487	32.58		688	0.4514	35.36		688	0.3302	46.75		688	0.2327	58.53		688	0.2145	61.02		688	0.1537	70.2		688	0.1206	75.75		688	0.0968	80.01		688	0.0835	82.51
689	0.4516	35.35		689	0.4449	35.9		689	0.4188	38.13		689	0.3094	49.05		689	0.2203	60.21		689	0.2063	62.18		689	0.1495	70.88		689	0.1179	76.23		689	0.0951	80.33		689	0.0821	82.77
690	0.4091	38.99		690	0.407	39.17		690	0.3895	40.79		690	0.2903	51.25		690	0.2089	61.82		690	0.1987	63.29		690	0.1454	71.54		690	0.1155	76.64		690	0.0935	80.64		690	0.0809	83
691	0.371	42.56		691	0.3716	42.5		691	0.3624	43.41		691	0.2732	53.31		691	0.1983	63.34		691	0.1915	64.34		691	0.1418	72.14		691	0.1133	77.04		691	0.0919	80.92		691	0.0797	83.24
[truncated: 409 more rows]

## Sheet: Figure_11_b_Solar_Simulator
MB Before Mix				MB in Dark				15 min				30 min				45 min				60 min				75 min				90 min				105 min				120 min
[truncated: 922 more rows]
