# Supplementary material for: Antifouling polymeric nanocomposite membrane based on interfacial polymerization of polyamide enhanced with green TiO2nanoparticles for water desalination
Source: PeerJ journal article supplement (doi:10.7717/peerj-achem.26), 2023-06-14
Supplement: Supplementary_Table_01.docx [file Supplementary_Table_01.docx]

**Flux and Salt Rejection**

|  | **Triplicate of Water Weight (g) at 2 bar** | | | | | |
| --- | --- | --- | --- | --- | --- | --- |
| **Time (min)** | **TFC** | | | **TFN** | | |
| 5 | | 3.7 | | --- | |  | |  | |  | |  | |  | | | 1.45 | | --- | |  | |  | |  | |  | |  | | | 3.2 | | --- | |  | |  | |  | |  | |  | | | 4.1 | | --- | |  | |  | |  | |  | |  | | | 3.8 | | --- | |  | |  | |  | |  | |  | | | 3.47 | | --- | |  | |  | |  | |  | |
| 10 | 3.9 | | 1.66 | | --- | |  | | 3.17 | 4.21 | 3.77 | 3.5 |
| 15 | 3.67 | 1.34 | 3.22 | 3.9 | 3.69 | 3.65 |
| 20 | 3.55 | 1.3 | | 3.44 | | --- | |  | | 4.02 | 3.71 | 3.49 |
| 25 | 3.1 | 1.34 | 3.32 | 4.25 | 3.91 | 3.58 |
| 30 | 3.2 | 1.25 | 3.12 | 3.92 | 3.87 | 3.55 |
| **NaCl Rejection %** | 84.1 | 83.2 | 84.6 | 78.6 | 77.8 | 76.4 |
