# Supplementary material for: Antifouling polymeric nanocomposite membrane based on interfacial polymerization of polyamide enhanced with green TiO2nanoparticles for water desalination
Source: PeerJ journal article supplement (doi:10.7717/peerj-achem.26), 2023-06-14
Supplement: Supplementary_Table_02.docx [file Supplementary_Table_02.docx]

**Antifouling**

|  | **Triplicate of Water Weight (g) at 2 bar** | | | | | | | | |
| --- | --- | --- | --- | --- | --- | --- | --- | --- | --- |
| **Time (min)** | **TFC** | | | | | | | | |
|  | **Before Foulent** | | | **With Foulnet** | | | **After Washing** | | |
| 5 | 2.3 | 1.55 | 3.5 | 3.1 | 2.88 | 2.3 | 1.77 | 0.66 | 2.3 |
| 10 | 2.6 | 1.77 | 3.8 | 2.47 | 2.37 | 2.2 | 1.54 | 0.7 | 2.4 |
| 15 | 2.55 | 1.6 | 3.33 | 2.01 | 1.94 | 1.9 | 1.87 | 0.87 | 2.5 |
| 20 | 2.79 | 1.4 | 3.77 | 1.8 | 1.73 | 1.6 | 1.67 | 0.78 | 2.45 |
| 25 | 2.46 | 1.9 | 3.9 | 1.58 | 1.51 | 1.5 | 1.8 | 0.76 | 2.54 |
| 30 | 2.7 | 2 | 3.4 | 1.45 | 1.45 | 1.3 | 1.66 | 0.69 | 2.34 |
| 35 | 2.54 | 1.45 | 3.53 | 1.4 | 1.26 | 1.1 | 1.67 | 0.79 | 2.6 |
| 40 | 2.34 | 1.67 | 3.8 | 1.41 | 1.23 | 1.11 | 1.68 | 0.9 | 2.51 |
| 45 | 2.76 | 1.8 | 3.9 | 1.38 | 1.11 | 1.1 | 1.65 | 0.84 | 2.53 |
| 50 | 2.8 | 1.3 | 3.5 | 1.27 | 1.1 | 0.98 | 1.8 | 0.85 | 2.34 |
| 55 | 2.9 | 1.87 | 3.76 | 1.25 | 0.99 | 0.89 | 1.85 | 0.8 | 2.43 |
| 60 | 2.4 | 1.65 | 3.38 | 1.19 | 1.04 | 0.87 | 1.67 | 0.77 | 2.5 |
| 65 | 2.6 | 1.94 | 3.87 | 1.1 | 0.96 | 0.85 | 1.7 | 0.75 | 2.41 |
| 70 | 2.55 | 1.89 | 3.57 | 1.01 | 0.87 | 0.82 | 1.59 | 0.87 | 2.3 |
| 75 | 2.61 | 1.67 | 3.66 | 1.01 | 0.86 | 0.81 | 1.71 | 0.82 | 2.39 |
| 80 | 2.69 | 1.8 | 3.87 | 1.01 | 0.85 | 0.8 | 1.81 | 0.9 | 2.4 |
| 85 | 2.54 | 1.67 | 3.7 | 1 | 0.86 | 0.81 | 1.64 | 0.77 | 2.32 |
| 90 | 2.5 | 1.89 | 3.8 | 1 | 0.85 | 0.8 | 1.66 | 0.75 | 2.37 |

| **Time (min)** | **TFN** | | | | | | | | | |
| --- | --- | --- | --- | --- | --- | --- | --- | --- | --- | --- |
|  | **Before Foulent** | | | **With Foulnet** | | | **After Washing** | | | |
| 5 | 3.66 | 4.27 | 3.59 | 3.56 | 3.87 | 4.27 | | 3.52 | 3 | 3.3 |
| 10 | 3.76 | 4.33 | 3.51 | 3.47 | 3.71 | 4.16 | | 3.5 | 2.92 | 3.29 |
| 15 | 3.76 | 4.09 | 3.56 | 3.37 | 3.67 | 3.92 | | 3.3 | 2.93 | 3.27 |
| 20 | 3.93 | 4.1 | 3.5 | 3.25 | 3.54 | 3.86 | | 3.29 | 2.83 | 3.25 |
| 25 | 3.83 | 4.31 | 3.65 | 3.1 | 3.31 | 3.78 | | 3.47 | 2.88 | 3.3 |
| 30 | 3.73 | 4.22 | 3.65 | 2.89 | 3.01 | 3.7 | | 3.32 | 2.9 | 3.29 |
| 35 | 3.64 | 4.31 | 3.54 | 2.72 | 2.89 | 3.68 | | 3.5 | 2.76 | 3.22 |
| 40 | 3.6 | 4.16 | 3.65 | 2.6 | 2.73 | 3.66 | | 3.52 | 2.84 | 3.31 |
| 45 | 3.7 | 4.18 | 3.54 | 2.51 | 2.57 | 3.59 | | 3.48 | 2.93 | 3.27 |
| 50 | 3.91 | 4.27 | 3.49 | 2.47 | 2.39 | 3.38 | | 3.37 | 2.88 | 3.27 |
| 55 | 3.85 | 4.28 | 3.65 | 2.28 | 2.3 | 3.21 | | 3.5 | 2.95 | 3.3 |
| 60 | 3.7 | 4.3 | 3.54 | 2.11 | 2.1 | 3.19 | | 3.3 | 2.96 | 3.28 |
| 65 | 3.87 | 4.21 | 3.6 | 1.91 | 1.78 | 3.09 | | 3.48 | 2.94 | 3.25 |
| 70 | 3.91 | 4.1 | 3.57 | 1.78 | 1.65 | 2.98 | | 3.52 | 2.98 | 3.2 |
| 75 | 3.71 | 3.9 | 3.5 | 1.76 | 1.57 | 2.87 | | 3.4 | 2.75 | 3.27 |
| 80 | 3.77 | 4.25 | 3.48 | 1.68 | 1.55 | 2.8 | | 3.31 | 2.76 | 3.31 |
| 85 | 3.69 | 4.02 | 3.65 | 1.67 | 1.54 | 2.78 | | 3.3 | 2.85 | 3.26 |
| 90 | 3.8 | 3.92 | 3.57 | 1.67 | 1.54 | 2.78 | | 3.4 | 2.94 | 3.22 |
